# Supplementary material for: To Target or Not to Target Schistosoma mansoni Cyclic Nucleotide Phosphodiesterase 4A?
Source: MDPI journal article supplement (doi:10.3390/ijms24076817), 2023-04-06
Supplement: s1 [file s1]

## Supplementary data

### To target or not to target *Schistosoma mansoni* cyclic nucleotide phosphodiesterase 4A?

Yang Zheng<sup>1</sup>, Susanne Schroeder<sup>2</sup>, Georgi K. Kanev<sup>1</sup>, Sanaa S. Botros<sup>3</sup>, Samia William<sup>4</sup>, Abdel-Nasser A. Sabra<sup>3</sup>, Louis Maes<sup>5</sup>, Guy Caljon<sup>5</sup>, Carmen Gil<sup>6</sup>, Ana Martinez<sup>6</sup>, Irene G. Salado<sup>7</sup>, Koen Augustyns<sup>7</sup>, Ewald Edink<sup>1</sup>, Maarten Sijm<sup>1</sup>, Erik de Heuvel<sup>1</sup>, Iwan J. P. de Esch<sup>1</sup>, Tiffany van der Meer<sup>1</sup>, Marco Siderius<sup>1</sup>, Geert Jan Sterk<sup>1</sup>, David Brown<sup>2</sup> and Rob Leurs<sup>1\*</sup>

<sup>1</sup> Division of Medicinal Chemistry, Amsterdam Institute of Molecular and Life Sciences, Vrije Universiteit Amsterdam, 1081 HZ Amsterdam, the Netherlands.

<sup>2</sup> School of Biosciences, University of Kent, Canterbury CT2 7NJ, UK.

<sup>3</sup> Pharmacology Department, Theodor Bilharz Research Institute, Warrak El-Hadar, Imbaba, P.O. Box 30, Giza, 12411, Egypt.

<sup>4</sup> Parasitology Department, Theodor Bilharz Research Institute, Warrak El-Hadar, Imbaba, P.O. Box 30, Giza, 12411, Egypt.

<sup>5</sup> Laboratory of Microbiology, Parasitology and Hygiene (LMPH), University of Antwerp, Universiteitsplein 1, 2610 Wilrijk, Belgium.

<sup>6</sup> Centro de Investigaciones Biologicas (CIB-CSIC), Ramiro de Maeztu 9, 28040 Madrid, Spain.

<sup>7</sup> Medicinal Chemistry, Faculty of Pharmaceutical, Biomedical and Veterinary Sciences, University of Antwerp, Universiteitsplein 1, 2610 Antwerp, Belgium.

\* Corresponding author: r.leurs@vu.nl (RL)

## Table of contents

|                       |          |
|-----------------------|----------|
| Experimental section  | P3-29    |
| Table S1-2            | P30-32   |
| Figure S1-2           | P33-34   |
| Crystallographic data | P35      |
| Figure S3-S257        | P36-206  |
| References            | P207-209 |

Table S1. Overview of the PDE4NPD toolbox and inhibitor selectivity for human (h) or parasite PDEs.

Table S2. SmpPDE4A inhibition of roflumilast analogues.

Fig S1. Correlation plot of the inhibition of the PDE Toolbox compounds of the enzymatic activities of purified SmpPDE4A\_CD (catalytic domain) and SmpPDE4A\_FL (full length).

Fig S2. Binding of the substrate cAMP (A) and its hydrolyzed product AMP (B) in the binding pockets of SmpPDE4A\_CD, as observed in the chain A and chain B of the X-ray structure 6FG5.

Fig S3-S257. Chemical characterization of final compounds.



## Experimental section

All starting materials were obtained from commercial suppliers and used without purification. Anhydrous THF and DMF were obtained by passing through an activated alumina column prior to use. TLC analyses were performed using Merck F<sub>254</sub> aluminum-backed silica plates and visualized with 254 nm UV light. Flash column chromatography was executed using Biotage Isolera equipment. All HRMS spectra were recorded on a Bruker microTOF mass spectrometer using ESI in positive-ion mode. All NMR spectra were recorded on either a Bruker Avance 250, Bruker Avance 300, Bruker Avance 500, or Bruker Avance 600 spectrometer. The peak multiplicities are defined as follows: s, singlet; d, doublet; t, triplet; q, quartet; p, pentet; dd, doublet of doublets; dt, doublet of triplets; td, triplet of doublets; br, broad; m, multiplet; app, apparent. The spectra were referenced to the internal solvent peak as follows: CDCl<sub>3</sub> ( $\delta$  = 7.26 ppm in <sup>1</sup>H NMR,  $\delta$  = 77.16 ppm in <sup>13</sup>C NMR), DMSO-*d*<sub>6</sub> ( $\delta$  = 2.50 ppm in <sup>1</sup>H NMR,  $\delta$  = 39.52 ppm in <sup>13</sup>C NMR). IUPAC names were adapted from ChemBioDraw Ultra 19.0. Purities were measured with the aid of analytical LC-MS using a Shimadzu LC-20AD liquid chromatography pump system with a Shimadzu SPDMS20A diode array detector with the MS detection performed with a Shimadzu LCMS-2010EV mass spectrometer operating in positive ionization mode. The column used was an Xbridge (C18) 5  $\mu$ m column (100 mm  $\times$  4.6 mm). The following solutions are used for the eluents. Solvent A: H<sub>2</sub>O/HCOOH 999:1, and solvent B: MeCN/HCOOH 999:1. The eluent program used is as follows: flow rate: 1.0 mL/min, start with 95% A in a linear gradient to 10% A over 4.5 min, hold 1.5 min at 10% A, in 0.5 min in a linear gradient to 95% A, hold 1.5 min at 95% A, total run time: 8.0 min. Compound purities were calculated as the percentage peak area of the analyzed compound by UV detection at 254 nm. Given that many compounds were made by undergraduate students and re-purification was usually necessary, yields are not representative and are therefore omitted from the procedures.

General procedure for all compounds: under an N<sub>2</sub> atmosphere in a dry flask, oxalyl chloride (4.8 mmol, 1.2 eq.) was added dropwise to a mixture of carboxylic acid A (4.0 mmol, 1.0 eq.) and DMF (100  $\mu$ L) in THF (20 mL) at 0°C. The mixture was allowed to reach room temperature and stirred for an additional 30 min to obtain the corresponding acyl chloride. In another dry flask with N<sub>2</sub> insert, NaH (60% dispersion in mineral oil, 10.0 mmol, 2.5 eq.) was added in small portions to amine/aniline B (10.0 mmol, 2.5 eq.) in DMF (20 mL) at 0°C. The suspension was allowed to reach room temperature and stirred for an additional 30 min. To this mixture, the crude acyl chloride solution was added dropwise at 0°C. The reaction mixture was allowed to reach room temperature and stirred for an additional 30 min. After quenching with a saturated NH<sub>4</sub>Cl solution (150 mL), the aqueous suspension was extracted with EtOAc for three times. The combined organic layers were washed with brine, dried over Na<sub>2</sub>SO<sub>4</sub> and concentrated *in vacuo*. The crude product was purified using flash column chromatography. All compounds were analyzed using LCMS, <sup>1</sup>H NMR, <sup>13</sup>C NMR and HRMS and had purity >95% (area% on LC at 254 nm).

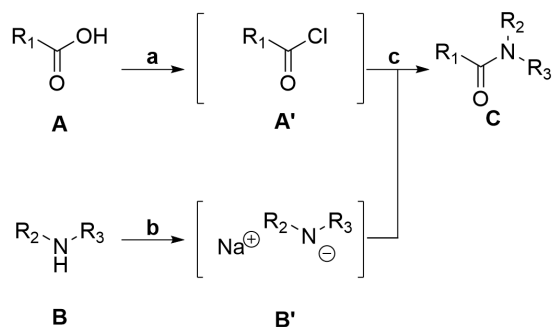

**Scheme 1. General synthetic route of the roflumilast analogue library.** Reagents and conditions: a: acid A, THF, (COCl)<sub>2</sub>, *cat.* DMF, 0°C to RT, 30 min; b: amine/aniline B, NaH, DMF, 0°C to RT, 30 min; c: A', B', 0°C to RT, 30 min; d: C, *m*-CPBA, DCM, RT, 30 min.

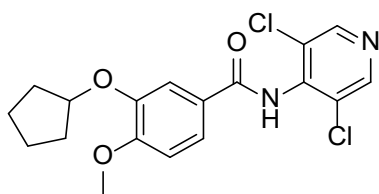

**3-(Cyclopentyloxy)-N-(3,5-dichloropyridin-4-yl)-4-methoxybenzamide (NPD-0005).**

<sup>1</sup>H NMR (500 MHz, CDCl<sub>3</sub>) δ 8.56 (s, 2H), 7.69 (s, 1H), 7.52 - 7.48 (m, 2H), 6.94 (d, *J* = 8.3 Hz, 1H), 4.87 (tt, *J* = 6.3, 3.2 Hz, 1H), 3.93 (s, 3H), 2.04 - 1.80 (m, 6H), 1.67 - 1.59 (m, 2H). <sup>13</sup>C NMR (126 MHz, CDCl<sub>3</sub>) δ 164.3, 154.2, 148.2, 148.0, 140.7, 128.8, 125.0, 120.7, 114.3, 111.0, 80.9, 56.3, 32.9, 24.2. LC-MS: *t*<sub>R</sub> = 4.52 min, purity: >99%, *M/z* [M+H]<sup>+</sup>: 381; HRMS calcd. for C<sub>18</sub>H<sub>18</sub>Cl<sub>2</sub>N<sub>2</sub>O<sub>3</sub> [M+H]<sup>+</sup> = 381.0767, found 381.0784. Spectral data are in agreement with a previous report. [1]

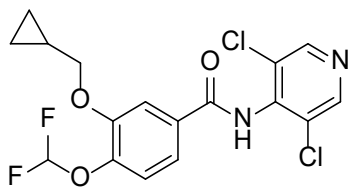

**3-(Cyclopropylmethoxy)-N-(3,5-dichloropyridin-4-yl)-4-(difluoromethoxy)benzamide (NPD-0006)**

<sup>1</sup>H NMR (600 MHz, CDCl<sub>3</sub>) δ 8.58 (s, 2H), 7.70 (s, 1H), 7.59 (s, 1H), 7.47 (d, *J* = 8.2 Hz, 1H), 7.29 (d, *J* = 8.2 Hz, 1H), 6.75 (t, *J* = 74.8 Hz, 1H), 3.97 (d, *J* = 6.9 Hz, 2H), 1.36 - 1.28 (m, 1H), 0.70 - 0.66 (m, 2H), 0.40 - 0.36 (m, 2H). <sup>13</sup>C NMR (151 MHz, CDCl<sub>3</sub>) δ 163.8, 151.1, 148.4, 144.0, 139.9, 130.9, 129.0, 122.5, 120.0, 117.5, 115.8 (t, *J* = 256.7 Hz), 74.4, 10.2, 3.5. LC-MS: *t*<sub>R</sub> = 4.65 min, purity: 99%, *M/z* [M+H]<sup>+</sup>: 403; HRMS calcd. for C<sub>17</sub>H<sub>14</sub>Cl<sub>2</sub>F<sub>2</sub>N<sub>2</sub>O<sub>3</sub> [M+H]<sup>+</sup> = 403.0422, found 403.0417. Spectral data are in agreement with a previous report. [2]

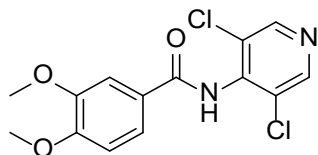

**N-(3,5-Dichloropyridin-4-yl)-3,4-dimethoxybenzamide (NPD-0446)**

$^1\text{H}$  NMR (500 MHz,  $\text{DMSO}-d_6$ )  $\delta$  10.48 (s, 1H), 8.77 (s, 2H), 7.70 (dd,  $J$  = 8.4, 2.1 Hz, 1H), 7.59 (d,  $J$  = 2.1 Hz, 1H), 7.14 (d,  $J$  = 8.5 Hz, 1H), 3.87 (s, 3H), 3.85 (s, 3H).  $^{13}\text{C}$  NMR (126 MHz,  $\text{DMSO}-d_6$ )  $\delta$  164.3, 152.3, 148.5, 148.3, 141.6, 130.8, 124.7, 121.6, 111.1, 111.0, 55.8, 55.6. LC-MS:  $t_R$  = 3.51 min, purity: >99%,  $M/z$   $[\text{M}+\text{H}]^+$ : 327; HRMS calcd. for  $\text{C}_{14}\text{H}_{12}\text{Cl}_2\text{N}_2\text{O}_3$   $[\text{M}+\text{H}]^+$  = 327.0298, found 327.0309. Spectral data are in agreement with a previous report. [3]

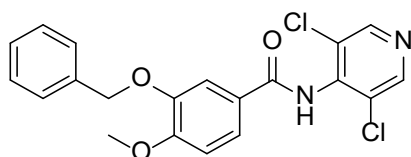

**3-(Benzyloxy)-N-(3,5-dichloropyridin-4-yl)-4-methoxybenzamide (NPD-0546)**

$^1\text{H}$  NMR (500 MHz,  $\text{DMSO}-d_6$  + 1 drop of  $\text{CDCl}_3$ )  $\delta$  10.35 (s, 1H), 8.61 (s, 2H), 7.71 - 7.66 (m, 2H), 7.47 - 7.43 (m, 2H), 7.38 - 7.33 (m, 2H), 7.32 - 7.27 (m, 1H), 7.07 - 7.02 (m, 1H), 5.13 (s, 2H), 3.86 (s, 3H).  $^{13}\text{C}$  NMR (126 MHz,  $\text{DMSO}-d_6$  + 1 drop of  $\text{CDCl}_3$ )  $\delta$  164.2, 152.5, 147.9, 147.3, 141.4, 136.5, 130.7, 128.2, 127.75, 127.68, 124.7, 122.0, 112.9, 110.8, 70.1, 55.6. LC-MS:  $t_R$  = 4.52 min, purity: >99%,  $M/z$   $[\text{M}+\text{H}]^+$ : 403; HRMS calcd. for  $\text{C}_{20}\text{H}_{16}\text{Cl}_2\text{N}_2\text{O}_3$   $[\text{M}+\text{H}]^+$  = 403.0611, found 403.0609. Spectral data are in agreement with a previous report. [4]

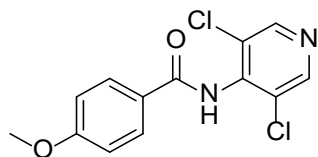

**N-(3,5-Dichloropyridin-4-yl)-4-methoxybenzamide (NPD-0548)**

$^1\text{H}$  NMR (500 MHz,  $\text{DMSO}-d_6$ )  $\delta$  10.49 (s, 1H), 8.76 (s, 2H), 8.02 (d,  $J$  = 8.9 Hz, 2H), 7.12 (d,  $J$  = 8.9 Hz, 2H), 3.87 (s, 3H).  $^{13}\text{C}$  NMR (126 MHz,  $\text{DMSO}-d_6$ )  $\delta$  164.3, 162.5, 148.3, 141.6, 130.9, 130.0, 124.8, 113.9, 55.6. LC-MS:  $t_R$  = 3.73 min, purity: >99%,  $M/z$   $[\text{M}+\text{H}]^+$ : 297; HRMS calcd. for  $\text{C}_{13}\text{H}_{10}\text{Cl}_2\text{N}_2\text{O}_2$   $[\text{M}+\text{H}]^+$  = 297.0192, found 297.0201.

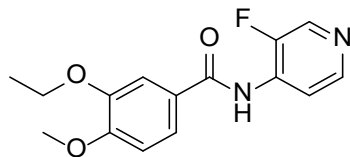

**3-Ethoxy-N-(3-fluoropyridin-4-yl)-4-methoxybenzamide (NPD-1177)**

$^1\text{H}$  NMR (250 MHz, DMSO- $d_6$ )  $\delta$  10.28 (s, 1H), 8.58 (d,  $J$  = 2.8 Hz, 1H), 8.38 (d,  $J$  = 5.3 Hz, 1H), 7.87 (dd,  $J$  = 6.7, 5.3 Hz, 1H), 7.63 (dd,  $J$  = 8.4, 2.1 Hz, 1H), 7.54 (d,  $J$  = 2.1 Hz, 1H), 7.10 (d,  $J$  = 8.5 Hz, 1H), 4.09 (q,  $J$  = 7.0 Hz, 2H), 3.85 (s, 3H), 1.36 (t,  $J$  = 7.0 Hz, 3H).  $^{13}\text{C}$  NMR (126 MHz, DMSO- $d_6$ )  $\delta$  165.2, 152.4, 151.4 (d,  $J$  = 255.1 Hz), 147.6, 146.3 (d,  $J$  = 5.0 Hz), 138.2 (d,  $J$  = 21.8 Hz), 133.7 (d,  $J$  = 9.5 Hz), 125.4, 121.8, 118.7 (app s), 112.1, 111.0, 63.9, 55.7, 14.7. LC-MS:  $t_R$  = 3.26 min, purity: >99%,  $M/z$   $[\text{M}+\text{H}]^+$ : 291; HRMS calcd. for  $\text{C}_{15}\text{H}_{15}\text{FN}_2\text{O}_3$   $[\text{M}+\text{H}]^+$  = 291.1139, found 291.1150.

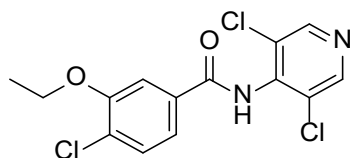

**4-Chloro-*N*-(3,5-dichloropyridin-4-yl)-3-ethoxybenzamide (NPD-1178)**

$^1\text{H}$  NMR (250 MHz, DMSO- $d_6$ )  $\delta$  10.73 (s, 1H), 8.77 (s, 2H), 7.71 - 7.65 (m, 1H), 7.66 - 7.61 (m, 2H), 4.22 (q,  $J$  = 7.0 Hz, 2H), 1.40 (t,  $J$  = 7.0 Hz, 3H).  $^{13}\text{C}$  NMR (126 MHz, DMSO- $d_6$ )  $\delta$  164.3, 154.4, 148.8, 141.6, 133.0, 131.1, 130.6, 126.1, 121.3, 113.1, 65.1, 15.0. LC-MS:  $t_R$  = 4.60 min, purity: 99%,  $M/z$   $[\text{M}+\text{H}]^+$ : 345; HRMS calcd. For  $\text{C}_{14}\text{H}_{11}\text{Cl}_3\text{N}_2\text{O}_2$   $[\text{M}+\text{H}]^+$  = 344.9959, found 344.9958.

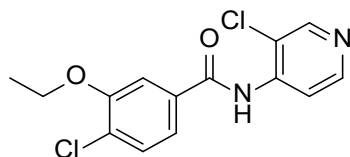

**4-Chloro-*N*-(3-chloropyridin-4-yl)-3-ethoxybenzamide (NPD-1179)**

$^1\text{H}$  NMR (250 MHz, DMSO- $d_6$ )  $\delta$  10.25 (s, 1H), 8.70 (s, 1H), 8.52 (d,  $J$  = 5.3 Hz, 1H), 7.83 (d,  $J$  = 5.3 Hz, 1H), 7.67 (d,  $J$  = 1.7 Hz, 1H), 7.63 (d,  $J$  = 8.2 Hz, 1H), 7.57 (dd,  $J$  = 8.2, 1.8 Hz, 1H), 4.22 (q,  $J$  = 7.0 Hz, 2H), 1.40 (t,  $J$  = 7.0 Hz, 3H).  $^{13}\text{C}$  NMR (126 MHz, DMSO- $d_6$ )  $\delta$  165.1, 154.3, 150.2, 149.1, 142.8, 133.9, 130.5, 126.0, 125.2, 121.4, 120.7, 113.2, 65.1, 15.0. LC-MS:  $t_R$  = 4.64 min, purity: >99%,  $M/z$   $[\text{M}+\text{H}]^+$ : 311; HRMS calcd. For  $\text{C}_{14}\text{H}_{12}\text{Cl}_2\text{N}_2\text{O}_2$   $[\text{M}+\text{H}]^+$  = 311.0349, found 311.0351.

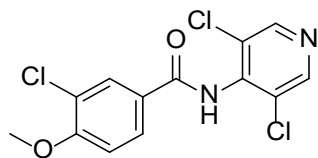

**3-Chloro-*N*-(3,5-dichloropyridin-4-yl)-4-methoxybenzamide (NPD-1180)**

$^1\text{H}$  NMR (250 MHz, DMSO- $d_6$ )  $\delta$  10.63 (s, 1H), 8.75 (s, 2H), 8.11 (s, 1H), 8.01 (d,  $J$  = 8.7 Hz, 1H), 7.34 (d,  $J$  = 8.8 Hz, 1H), 3.96 (s, 3H).  $^{13}\text{C}$  NMR (126 MHz, DMSO- $d_6$ )  $\delta$  163.2, 157.8, 148.4, 141.2, 130.7, 129.5, 128.9, 125.5, 121.2, 112.7, 56.7. LC-MS:  $t_R$  = 4.18 min, purity: 98%,  $M/z$   $[\text{M}+\text{H}]^+$ : 331; HRMS calcd. For  $\text{C}_{13}\text{H}_9\text{Cl}_3\text{N}_2\text{O}_2$   $[\text{M}+\text{H}]^+$  = 330.9802, found 330.9810.

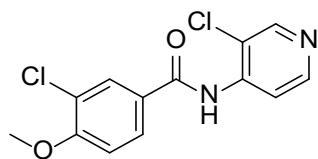

**3-Chloro-*N*-(3-chloropyridin-4-yl)-4-methoxybenzamide (NPD-1181)**

$^1\text{H}$  NMR (250 MHz,  $\text{DMSO-}d_6$ )  $\delta$  10.17 (s, 1H), 8.68 (s, 1H), 8.50 (d,  $J$  = 5.4 Hz, 1H), 8.09 (d,  $J$  = 2.2 Hz, 1H), 8.00 (dd,  $J$  = 8.6, 2.3 Hz, 1H), 7.84 (dd,  $J$  = 5.6, 0.5 Hz, 1H), 7.33 (d,  $J$  = 8.7 Hz, 1H), 3.97 (s, 3H).  $^{13}\text{C}$  NMR (126 MHz,  $\text{DMSO-}d_6$ )  $\delta$  164.3, 158.1, 150.2, 149.0, 142.9, 130.1, 129.4, 126.7, 125.1, 121.5, 120.5, 113.0, 57.1. LC-MS:  $t_R$  = 4.13 min, purity: >99%,  $M/z$   $[\text{M}+\text{H}]^+$ : 297; HRMS calcd. For  $\text{C}_{13}\text{H}_{10}\text{Cl}_2\text{N}_2\text{O}_2$   $[\text{M}+\text{H}]^+$  = 297.0192, found 297.0197.

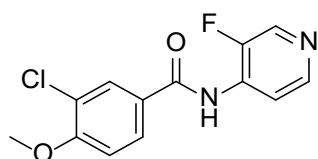

**3-Chloro-*N*-(3-fluoropyridin-4-yl)-4-methoxybenzamide (NPD-1182)**

$^1\text{H}$  NMR (500 MHz,  $\text{CDCl}_3$ )  $\delta$  10.45 (s, 1H), 8.59 (d,  $J$  = 2.9 Hz, 1H), 8.38 (d,  $J$  = 5.3 Hz, 1H), 8.09 (d,  $J$  = 2.2 Hz, 1H), 7.98 (dd,  $J$  = 8.7, 2.3 Hz, 1H), 7.88 (dd,  $J$  = 6.7, 5.3 Hz, 1H), 7.31 (d,  $J$  = 8.8 Hz, 1H), 3.96 (s, 3H).  $^{13}\text{C}$  NMR (126 MHz,  $\text{DMSO-}d_6$ )  $\delta$  164.2, 157.6, 151.3 (d,  $J$  = 255.7 Hz), 146.3 (d,  $J$  = 5.1 Hz), 138.2 (d,  $J$  = 21.8 Hz), 133.4 (d,  $J$  = 9.2 Hz), 129.8, 129.1, 126.3, 120.9, 118.6 (app s), 112.5, 56.6. LC-MS:  $t_R$  = 3.53 min, purity: >99%,  $M/z$   $[\text{M}+\text{H}]^+$ : 281; HRMS calcd. For  $\text{C}_{13}\text{H}_{10}\text{ClFN}_2\text{O}_2$   $[\text{M}+\text{H}]^+$  = 281.0488, found 281.0490.

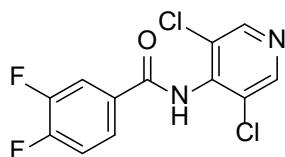

***N*-(3,5-Dichloropyridin-4-yl)-3,4-difluorobenzamide (NPD-1183)**

$^1\text{H}$  NMR (250 MHz,  $\text{DMSO-}d_6$ )  $\delta$  10.82 (s, 1H), 8.79 (s, 2H), 8.11-8.00 (m, 1H), 7.96-7.89 (m, 1H), 7.75-7.62 (m, 1H).  $^{13}\text{C}$  NMR (126 MHz,  $\text{DMSO-}d_6$ )  $\delta$  162.8 (d,  $J$  = 2.0 Hz), 152.2 (dd,  $J$  = 252.3, 12.6 Hz), 149.7 (dd,  $J$  = 249.8, 12.7 Hz), 148.4, 140.9, 130.7, 130.0 (dd,  $J$  = 4.7, 3.4 Hz), 125.7 (dd,  $J$  = 7.7, 3.5 Hz), 118.2 (d,  $J$  = 17.7 Hz), 117.4 (d,  $J$  = 18.6 Hz). LC-MS:  $t_R$  = 4.15 min, purity: >99%,  $M/z$   $[\text{M}+\text{H}]^+$ : 303; HRMS calcd. For  $\text{C}_{12}\text{H}_6\text{Cl}_2\text{F}_2\text{N}_2\text{O}$   $[\text{M}+\text{H}]^+$  = 302.9898, found 302.9908.

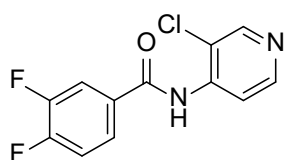

***N*-(3-Chloropyridin-4-yl)-3,4-difluorobenzamide (NPD-1184)**

$^1\text{H}$  NMR (250 MHz, DMSO- $d_6$ )  $\delta$  10.33 (s, 1H), 8.70 (d,  $J$  = 0.5 Hz, 1H), 8.52 (d,  $J$  = 5.3 Hz, 1H), 8.11-8.00 (m, 1H), 7.93-7.85 (m, 1H), 7.83 (dd,  $J$  = 5.4, 0.5 Hz, 1H), 7.75-7.58 (m, 1H).  $^{13}\text{C}$  NMR (126 MHz, DMSO- $d_6$ )  $\delta$  163.6 (d,  $J$  = 2.0 Hz), 152.0 (dd,  $J$  = 252.0, 12.7 Hz), 149.8, 149.2 (dd,  $J$  = 247.2, 13.1 Hz), 148.7, 142.3, 130.9 (dd,  $J$  = 5.3, 3.4 Hz), 125.8 (dd,  $J$  = 7.7, 3.5 Hz), 124.8, 120.2, 118.0 (d,  $J$  = 17.8 Hz), 117.6 (d,  $J$  = 18.6 Hz). LC-MS:  $t_R$  = 4.01 min, purity: >99%,  $M/z$   $[\text{M}+\text{H}]^+$ : 269; HRMS calcd. For  $\text{C}_{12}\text{H}_7\text{ClF}_2\text{N}_2\text{O}$   $[\text{M}+\text{H}]^+$  = 269.0288, found 269.0299.

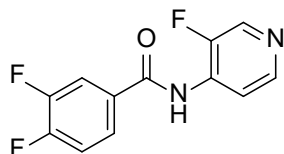***N*-(3,4-Difluoro-*N*-(3-fluoropyridin-4-yl)benzamide (NPD-1185)**

$^1\text{H}$  NMR (250 MHz,  $\text{CDCl}_3$ )  $\delta$  8.49 (d,  $J$  = 2.3 Hz, 1H), 8.45 (d,  $J$  = 6.2 Hz, 1H), 8.41 (d,  $J$  = 5.4 Hz, 1H), 8.16 (s, 1H), 7.84 - 7.71 (m, 1H), 7.71 - 7.59 (m, 1H), 7.40 - 7.27 (m, 1H).  $^{13}\text{C}$  NMR (126 MHz, DMSO- $d_6$ )  $\delta$  163.9 (d,  $J$  = 2.1 Hz), 151.2 (d,  $J$  = 255.6 Hz), 152.0 (dd,  $J$  = 251.9, 12.6 Hz), 149.1 (dd,  $J$  = 246.9, 13.0 Hz), 146.4 (d,  $J$  = 5.3 Hz), 138.3 (d,  $J$  = 21.6 Hz), 133.1 (d,  $J$  = 9.4 Hz), 130.9 (dd,  $J$  = 5.3, 3.4 Hz), 125.9 (dd,  $J$  = 7.6, 3.4 Hz), 118.5 (app s), 117.8 (d,  $J$  = 17.7 Hz), 117.8 (d,  $J$  = 18.6 Hz). LC-MS:  $t_R$  = 3.50 min, purity: >99%,  $M/z$   $[\text{M}+\text{H}]^+$ : 253; HRMS calcd. For  $\text{C}_{12}\text{H}_7\text{F}_3\text{N}_2\text{O}$   $[\text{M}+\text{H}]^+$  = 253.0583, found 253.0593.

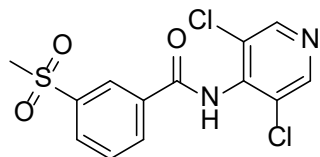***N*-(3,5-Dichloropyridin-4-yl)-3-(methylsulfonyl)benzamide (NPD-1186)**

$^1\text{H}$  NMR (500 MHz, DMSO- $d_6$  + 1 drop of  $\text{CDCl}_3$ )  $\delta$  10.96 (s, 1H), 8.69 (s, 2H), 8.57 (d,  $J$  = 8.7 Hz, 1H), 8.33 (d,  $J$  = 7.8 Hz, 1H), 8.18 (d,  $J$  = 7.9 Hz, 1H), 7.83 (t,  $J$  = 7.8 Hz, 1H), 3.26 (s, 3H).  $^{13}\text{C}$  NMR (126 MHz, DMSO- $d_6$  + 1 drop of  $\text{CDCl}_3$ )  $\delta$  163.8, 148.6, 148.2, 141.7, 134.2, 133.4, 131.1, 131.0, 130.4, 126.9, 44.0. LC-MS:  $t_R$  = 3.81 min, purity: >99%,  $M/z$   $[\text{M}+\text{H}]^+$ : 345; HRMS calcd. For  $\text{C}_{13}\text{H}_{10}\text{Cl}_2\text{N}_2\text{O}_3\text{S}$   $[\text{M}+\text{H}]^+$  = 344.9862, found 344.9852.

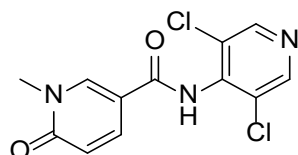***N*-(3,5-Dichloropyridin-4-yl)-1-methyl-6-oxo-1,6-dihydropyridine-3-carboxamide (NPD-1187)**

$^1\text{H}$  NMR (250 MHz, DMSO- $d_6$ )  $\delta$  10.41 (s, 1H), 8.74 (s, 2H), 8.57 (d,  $J$  = 2.6 Hz, 1H), 7.98 (dd,  $J$  = 9.5, 2.7 Hz, 1H), 6.50 (d,  $J$  = 9.5 Hz, 1H), 3.53 (s, 3H).  $^{13}\text{C}$  NMR (126 MHz, DMSO- $d_6$ )  $\delta$  162.6, 162.3, 148.8, 144.3, 141.6, 138.2, 130.9, 118.6,

111.1, 38.0. LC-MS:  $t_R$  = 2.69 min, purity: >99%,  $M/z$   $[M+H]^+$ : 298; HRMS calcd. For  $C_{12}H_9Cl_2N_3O_2$   $[M+H]^+$  = 298.0145, found 298.0152.

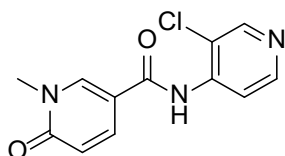

**N-(3-Chloropyridin-4-yl)-1-methyl-6-oxo-1,6-dihydropyridine-3-carboxamide acetate (NPD-1188)**

$^1H$  NMR (250 MHz, DMSO- $d_6$ )  $\delta$  8.66 (s, 1H), 8.60 (d,  $J$  = 2.6 Hz, 1H), 8.48 (d,  $J$  = 5.4 Hz, 1H), 7.94 (dd,  $J$  = 9.5, 2.7 Hz, 1H), 7.82 (d,  $J$  = 5.4 Hz, 1H), 6.48 (d,  $J$  = 9.6 Hz, 1H), 1.89 (s, 3H).  $^{13}C$  NMR (126 MHz, DMSO- $d_6$ )  $\delta$  172.3, 163.0, 161.8, 149.7, 148.6, 143.9, 142.5, 138.1, 123.9, 119.4, 118.0, 111.4, 37.5. LC-MS:  $t_R$  = 2.29 min, purity: 95%,  $M/z$   $[M+H]^+$ : 264; HRMS calcd. For  $C_{12}H_{10}ClN_3O_2$   $[M+H]^+$  = 264.0534, found 264.0545.

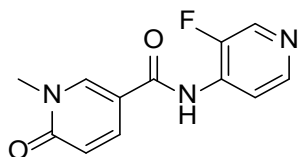

**N-(3-Fluoropyridin-4-yl)-1-methyl-6-oxo-1,6-dihydropyridine-3-carboxamide (NPD-1189)**

$^1H$  NMR (250 MHz, DMSO- $d_6$ )  $\delta$  10.20 (s, 1H), 8.61- 8.55 (m, 2H), 8.36 (d,  $J$  = 5.3 Hz, 1H), 7.94- 7.87 (m, 2H), 6.46 (d,  $J$  = 9.5 Hz, 1H), 3.51 (s, 3H).  $^{13}C$  NMR (126 MHz, DMSO- $d_6$ )  $\delta$  163.3, 161.8, 150.8 (d,  $J$  = 255.1 Hz), 146.4 (d,  $J$  = 5.1 Hz), 143.9, 138.3, 138.1 (d,  $J$  = 21.7 Hz), 133.4 (d,  $J$  = 9.0 Hz), 118.0 (app s), 117.8, 111.3, 37.5. LC-MS:  $t_R$  = 1.94 min, purity: >99%,  $M/z$   $[M+H]^+$ : 248; HRMS calcd. For  $C_{12}H_{10}FN_3O_2$   $[M+H]^+$  = 248.0830, found 248.0840.

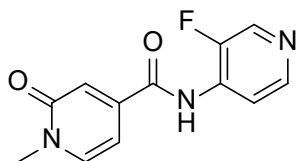

**N-(3-Fluoropyridin-4-yl)-1-methyl-2-oxo-1,2-dihydropyridine-4-carboxamide (NPD-1190)**

$^1H$  NMR (250 MHz, DMSO- $d_6$ )  $\delta$  8.55 (d,  $J$  = 2.9 Hz, 1H), 8.35 (d,  $J$  = 5.3 Hz, 1H), 7.93 - 7.78 (m, 2H), 6.94 (d,  $J$  = 1.6 Hz, 1H), 6.60 (dd,  $J$  = 7.0, 2.0 Hz, 1H), 3.47 (s, 3H).  $^{13}C$  NMR (126 MHz, DMSO- $d_6$ )  $\delta$  164.5, 161.7, 151.5 (d,  $J$  = 255.8 Hz), 146.2 (d,  $J$  = 5.1 Hz), 144.9, 140.2, 138.1 (d,  $J$  = 21.9 Hz), 134.4 (app s), 118.8, 118.4 (app s), 103.2, 36.9. LC-MS:  $t_R$  = 2.00 min, purity: >99%,  $M/z$   $[M+H]^+$ : 248; HRMS calcd. For  $C_{12}H_{10}FN_3O_2$   $[M+H]^+$  = 248.0830, found 248.0829.

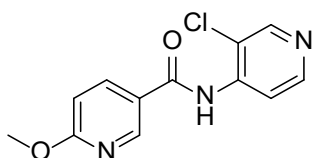

***N*-(3-Chloropyridin-4-yl)-6-methoxynicotinamide (NPD-1191)**

<sup>1</sup>H NMR (250 MHz, DMSO-*d*<sub>6</sub>) δ 10.20 (s, 1H), 8.81 (d, *J* = 2.1 Hz, 1H), 8.68 (s, 1H), 8.51 (d, *J* = 5.4 Hz, 1H), 8.24 (dd, *J* = 8.7, 2.5 Hz, 1H), 7.89 (d, *J* = 5.4 Hz, 1H), 6.98 (d, *J* = 8.7 Hz, 1H), 3.95 (s, 3H). <sup>13</sup>C NMR (126 MHz, DMSO-*d*<sub>6</sub>) δ 166.3, 164.5, 150.2, 149.1, 148.5, 142.7, 139.4, 124.7, 123.4, 120.1, 110.9, 54.3. LC-MS: *t*<sub>R</sub> = 3.37 min, purity: >99%, *M/z* [M+H]<sup>+</sup>: 264; HRMS calcd. For C<sub>12</sub>H<sub>10</sub>ClN<sub>3</sub>O<sub>2</sub> [M+H]<sup>+</sup> = 264.0534, found 264.0535.

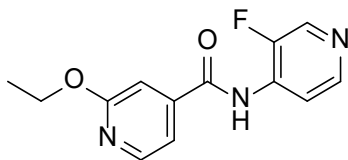***N*-(3-Fluoropyridin-4-yl)isonicotinamide (NPD-1192)**

<sup>1</sup>H NMR (250 MHz, DMSO-*d*<sub>6</sub>) δ 10.69 (s, 1H), 8.61 (d, *J* = 2.8 Hz, 1H), 8.40 (d, *J* = 5.3 Hz, 1H), 8.34 (dd, *J* = 5.3, 0.8 Hz, 1H), 7.91 (dd, *J* = 6.7, 5.3 Hz, 1H), 7.40 (dd, *J* = 5.3, 1.5 Hz, 1H), 7.27 (dd, *J* = 1.5, 0.8 Hz, 1H), 4.36 (q, *J* = 7.0 Hz, 2H), 1.33 (t, *J* = 7.0 Hz, 3H). <sup>13</sup>C NMR (126 MHz, DMSO-*d*<sub>6</sub>) δ 164.4, 163.7, 151.2 (d, *J* = 256.2 Hz), 147.9, 146.4 (d, *J* = 5.3 Hz), 143.9, 138.3 (d, *J* = 21.7 Hz), 132.9 (d, *J* = 9.3 Hz), 118.6 (app s), 115.0, 109.4, 61.8, 14.5. LC-MS: *t*<sub>R</sub> = 3.39 min, purity: >99%, *M/z* [M+H]<sup>+</sup>: 262; HRMS calcd. For C<sub>13</sub>H<sub>12</sub>FN<sub>3</sub>O<sub>2</sub> [M+H]<sup>+</sup> = 262.0986, found 262.0989.

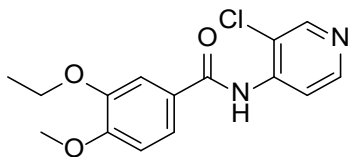***N*-(3-Chloropyridin-4-yl)-3-ethoxy-4-methoxybenzamide (NPD-1193)**

<sup>1</sup>H NMR (250 MHz, DMSO-*d*<sub>6</sub>) δ 9.94 (s, 1H), 8.67 (s, 1H), 8.49 (d, *J* = 5.4 Hz, 1H), 7.86 (d, *J* = 5.4 Hz, 1H), 7.64 (dd, *J* = 8.4, 2.1 Hz, 1H), 7.54 (d, *J* = 2.1 Hz, 1H), 7.11 (d, *J* = 8.5 Hz, 1H), 4.09 (q, *J* = 7.0 Hz, 2H), 3.85 (s, 3H), 1.36 (t, *J* = 6.9 Hz, 3H). <sup>13</sup>C NMR (126 MHz, DMSO-*d*<sub>6</sub>) δ 165.4, 152.8, 150.1, 149.0, 148.1, 143.1, 125.8, 124.8, 122.0, 120.2, 112.4, 111.6, 64.3, 56.2, 15.2. LC-MS: *t*<sub>R</sub> = 3.83 min, purity: >99%, *M/z* [M+H]<sup>+</sup>: 307; HRMS calcd. For C<sub>15</sub>H<sub>15</sub>ClN<sub>2</sub>O<sub>3</sub> [M+H]<sup>+</sup> = 307.0844, found 307.0852.

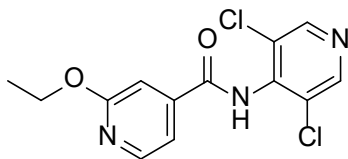***N*-(3,5-Dichloropyridin-4-yl)-2-ethoxyisonicotinamide (NPD-1194)**

<sup>1</sup>H NMR (250 MHz, DMSO-*d*<sub>6</sub>) δ 10.95 (s, 1H), 8.79 (s, 2H), 8.39 (dd, *J* = 5.3, 0.6 Hz, 2H), 7.45 (d, *J* = 5.3, 1.5 Hz, 1H), 7.35 - 7.28 (m, 1H), 4.38 (q, *J* = 7.0 Hz, 2H), 1.35 (t, *J* = 7.0 Hz, 3H). <sup>13</sup>C NMR (126 MHz, DMSO-*d*<sub>6</sub>) δ 164.3, 163.7,



148.9, 148.7, 143.3, 141.0, 131.1, 115.2, 109.5, 62.3, 14.9. LC-MS:  $t_R$  = 4.01 min, purity: >99%,  $M/z$   $[M+H]^+$ : 312; HRMS calcd. For  $C_{13}H_{11}Cl_2N_3O_2$   $[M+H]^+$  = 312.0301, found 312.0296.

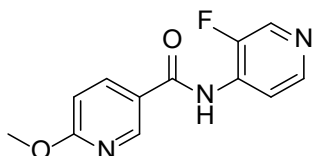

**N-(3-Fluoropyridin-4-yl)-6-methoxynicotinamide (NPD-1195)**

$^1H$  NMR (250 MHz, DMSO- $d_6$ )  $\delta$  10.51 (s, 1H), 8.78 (dd,  $J$  = 2.5, 0.8 Hz, 1H), 8.59 (d,  $J$  = 2.8 Hz, 1H), 8.38 (d,  $J$  = 5.3 Hz, 1H), 8.22 (dd,  $J$  = 8.7, 2.5 Hz, 1H), 7.93 (dd,  $J$  = 6.7, 5.3 Hz, 1H), 6.96 (dd,  $J$  = 8.7, 0.7 Hz, 1H), 3.93 (s, 3H).  $^{13}C$  NMR (126 MHz, DMSO- $d_6$ )  $\delta$  166.2, 164.8, 151.5 (d,  $J$  = 255.5 Hz), 148.7, 146.8 (d,  $J$  = 5.2 Hz), 139.5, 138.6 (d,  $J$  = 21.5 Hz), 133.8 (d,  $J$  = 9.3 Hz), 123.5, 118.7 (app s), 110.8, 54.3. LC-MS:  $t_R$  = 2.83 min, purity: >99%,  $M/z$   $[M+H]^+$ : 248; HRMS calcd. For  $C_{12}H_{10}FN_3O_2$   $[M+H]^+$  = 248.0830, found 248.0830.

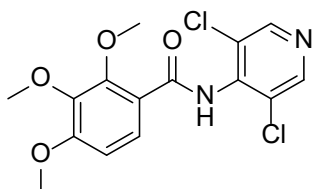

**N-(3,5-Dichloropyridin-4-yl)-2,3,4-trimethoxybenzamide (NPD-1196)**

$^1H$  NMR (500 MHz,  $CDCl_3$ )  $\delta$  10.01 (s, 1H), 8.56 (s, 2H), 7.99 (d,  $J$  = 9.0 Hz, 1H), 6.84 (d,  $J$  = 9.0 Hz, 1H), 4.16 (s, 3H), 3.95 (s, 3H), 3.92 (s, 3H).  $^{13}C$  NMR (126 MHz,  $CDCl_3$ )  $\delta$  162.0, 157.8, 152.7, 148.0, 141.8, 140.9, 129.5, 127.7, 117.2, 108.0, 62.5, 61.2, 56.4. LC-MS:  $t_R$  = 4.27 min, purity: >99%,  $M/z$   $[M+H]^+$ : 357; HRMS calcd. For  $C_{15}H_{14}Cl_2N_2O_4$   $[M+H]^+$  = 357.0403, found 357.0403. Spectral data are in agreement with a previous report. [3]

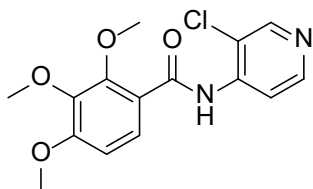

**N-(3-Chloropyridin-4-yl)-2,3,4-trimethoxybenzamide (NPD-1197)**

$^1H$  NMR (500 MHz,  $CDCl_3$ )  $\delta$  11.08 (s, 1H), 8.74 (d,  $J$  = 5.8 Hz, 1H), 8.58 (s, 1H), 8.44 (d,  $J$  = 5.8 Hz, 1H), 8.00 (d,  $J$  = 9.0 Hz, 1H), 6.85 (d,  $J$  = 9.1 Hz, 1H), 4.15 (s, 3H), 3.95 (s, 3H), 3.91 (s, 3H).  $^{13}C$  NMR (126 MHz,  $CDCl_3$ )  $\delta$  163.7, 158.1, 152.7, 147.7, 147.6, 144.0, 141.7, 127.7, 120.1, 117.4, 115.1, 108.0, 62.5, 61.2, 56.3. LC-MS:  $t_R$  = 4.06 min, purity: >99%,  $M/z$   $[M+H]^+$ : 323; HRMS calcd. For  $C_{15}H_{15}ClN_2O_4$   $[M+H]^+$  = 323.0793, found 323.0795.

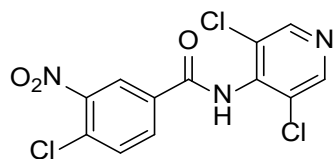

**4-Chloro-*N*-(3,5-dichloropyridin-4-yl)-3-nitrobenzamide (NPD-1198)**

$^1\text{H}$  NMR (500 MHz,  $\text{CDCl}_3$  + 1 drop of  $\text{DMSO}-d_6$ )  $\delta$  10.44 (s, 1H), 8.70 (s, 1H), 8.51 (s, 2H), 8.21 (d,  $J$  = 9.5 Hz, 1H), 7.63 (d,  $J$  = 9.5 Hz, 1H).  $^{13}\text{C}$  NMR (126 MHz,  $\text{CDCl}_3$  + 1 drop of  $\text{DMSO}-d_6$ )  $\delta$  162.4, 148.1, 147.6, 140.7, 133.3, 132.6, 132.1, 130.77, 130.75, 125.5. LC-MS:  $t_R$  = 4.31 min, purity: >99%,  $M/z$   $[\text{M}+\text{H}]^+$ : 346; HRMS calcd. For  $\text{C}_{12}\text{H}_6\text{Cl}_3\text{N}_3\text{O}_3$   $[\text{M}+\text{H}]^+$  = 345.9548, found 345.9547.

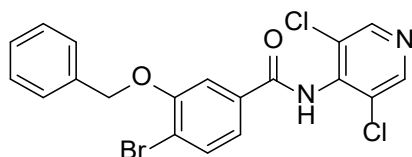

**3-(Benzyloxy)-4-bromo-*N*-(3,5-dichloropyridin-4-yl)benzamide (NPD-1199)**

$^1\text{H}$  NMR (500 MHz,  $\text{CDCl}_3$ )  $\delta$  9.82 (s, 1H), 8.45 (s, 2H), 7.62 - 7.53 (m, 2H), 7.49 - 7.43 (m, 1H), 7.42 - 7.35 (m, 2H), 7.32 - 7.19 (m, 3H), 5.12 (s, 2H).  $^{13}\text{C}$  NMR (126 MHz,  $\text{CDCl}_3$ )  $\delta$  164.5, 154.9, 148.0, 140.7, 135.8, 133.1, 133.0, 130.5, 128.4, 127.9, 127.0, 121.4, 116.9, 113.2, 70.6. LC-MS:  $t_R$  = 5.07 min, purity: >99%,  $M/z$   $[\text{M}+\text{H}]^+$ : 453; HRMS calcd. For  $\text{C}_{19}\text{H}_{13}\text{BrCl}_2\text{N}_2\text{O}_2$   $[\text{M}+\text{H}]^+$  = 450.9610, found 450.9621.

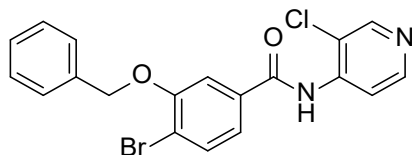

**3-(Benzyloxy)-4-bromo-*N*-(3-chloropyridin-4-yl)benzamide (NPD-1200)**

$^1\text{H}$  NMR (500 MHz,  $\text{CDCl}_3$ )  $\delta$  8.65 - 8.56 (m, 2H), 8.56 - 8.46 (m, 2H), 7.73 (d,  $J$  = 8.2 Hz, 1H), 7.53 - 7.47 (m, 3H), 7.44 - 7.39 (m, 2H), 7.37 - 7.33 (m, 1H), 7.30 (dd,  $J$  = 8.2, 2.0 Hz, 1H), 5.28 (s, 2H).  $^{13}\text{C}$  NMR (126 MHz,  $\text{CDCl}_3$ )  $\delta$  164.7, 155.9, 148.3, 148.0, 142.3, 135.7, 134.1, 133.8, 128.9, 128.4, 127.1, 120.1, 119.7, 118.5, 114.4, 112.7, 71.1. LC-MS:  $t_R$  = 5.17 min, purity: >99%,  $M/z$   $[\text{M}+\text{H}]^+$ : 417; HRMS calcd. For  $\text{C}_{19}\text{H}_{14}\text{BrClN}_2\text{O}_2$   $[\text{M}+\text{H}]^+$  = 417.0000, found 417.0006.

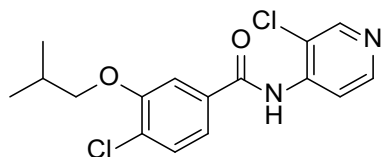

**4-Chloro-*N*-(3-chloropyridin-4-yl)-3-isobutoxybenzamide (NPD-1201)**

$^1\text{H}$  NMR (500 MHz,  $\text{CDCl}_3$ )  $\delta$  8.62 - 8.56 (m, 3H), 8.50 (d,  $J$  = 5.7 Hz, 1H), 7.53 - 7.47 (m, 2H), 7.31 (dd,  $J$  = 8.2, 2.0 Hz, 1H), 3.88 (d,  $J$  = 6.5 Hz, 2H), 2.19 (app hept,  $J$  = 6.6 Hz, 1H), 1.08 (d,  $J$  = 6.7 Hz, 6H).  $^{13}\text{C}$  NMR (126 MHz,  $\text{CDCl}_3$ )  $\delta$  164.8,

155.6, 148.4, 148.1, 142.3, 133.0, 130.7, 128.6, 120.1, 118.5, 114.4, 112.5, 75.7, 28.4, 19.3. LC-MS:  $t_R$  = 5.34 min, purity: 98%,  $M/z$   $[M+H]^+$ : 339; HRMS calcd. For  $C_{16}H_{16}Cl_2N_2O_2$   $[M+H]^+$  = 339.0662, found 339.0670.

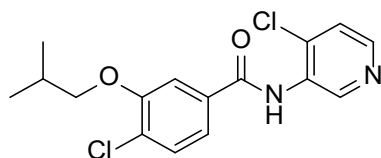

**4-Chloro-*N*-(4-chloropyridin-3-yl)-3-isobutoxybenzamide (NPD-1202)**

$^1H$  NMR (500 MHz, DMSO- $d_6$ )  $\delta$  10.44 (s, 1H), 8.71 (s, 1H), 8.47 (d,  $J$  = 5.2 Hz, 1H), 7.71 (s, 2H), 7.68 - 7.56 (m, 2H), 3.96 (d,  $J$  = 6.3 Hz, 2H), 2.12 (app hept,  $J$  = 6.5 Hz, 1H), 1.05 (d,  $J$  = 6.6 Hz, 6H).  $^{13}C$  NMR (126 MHz, DMSO- $d_6$ )  $\delta$  164.7, 154.0, 149.6, 148.2, 139.7, 133.4, 132.2, 130.0, 125.4, 124.7, 120.8, 112.7, 74.8, 27.8, 19.0. LC-MS:  $t_R$  = 4.95 min, purity: >99%,  $M/z$   $[M+H]^+$ : 339; HRMS calcd. For  $C_{16}H_{16}Cl_2N_2O_2$   $[M+H]^+$  = 339.0662, found 339.0675.

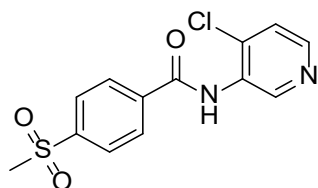

***N*-(4-Chloropyridin-3-yl)-4-(methylsulfonyl)benzamide (NPD-1203)**

$^1H$  NMR (500 MHz, DMSO- $d_6$ )  $\delta$  10.71 (s, 1H), 8.72 (s, 1H), 8.48 (d,  $J$  = 5.3 Hz, 1H), 8.23 (d,  $J$  = 8.5 Hz, 2H), 8.12 (d,  $J$  = 8.5 Hz, 2H), 7.72 (d,  $J$  = 5.3 Hz, 1H), 3.31 (s, 3H).  $^{13}C$  NMR (126 MHz, DMSO- $d_6$ )  $\delta$  164.7, 149.5, 148.5, 143.7, 139.8, 137.8, 131.9, 128.9, 127.4, 124.9, 43.3. LC-MS:  $t_R$  = 2.90 min, purity: 96%,  $M/z$   $[M+H]^+$ : 311; HRMS calcd. For  $C_{13}H_{11}ClN_2O_3S$   $[M+H]^+$  = 311.0252, found 311.0257.

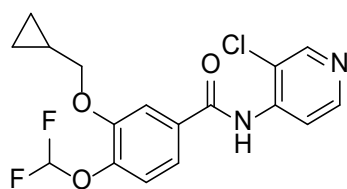

***N*-(3-Chloropyridin-4-yl)-3-(cyclopropylmethoxy)-4-(difluoromethoxy)benzamide (NPD-1204)**

$^1H$  NMR (500 MHz,  $CDCl_3$ )  $\delta$  8.58 (s, 1H), 8.52 (d,  $J$  = 5.5 Hz, 2H), 8.48 (d,  $J$  = 5.6 Hz, 1H), 7.57 (d,  $J$  = 2.1 Hz, 1H), 7.38 (dd,  $J$  = 8.3, 2.1 Hz, 1H), 7.30 (d,  $J$  = 8.3 Hz, 1H), 6.74 (t,  $J$  = 74.7 Hz, 1H), 3.97 (d,  $J$  = 7.0 Hz, 2H), 1.37 - 1.28 (m, 1H), 0.71 - 0.66 (m, 2H), 0.41 - 0.37 (m, 2H).  $^{13}C$  NMR (126 MHz,  $CDCl_3$ )  $\delta$  164.7, 151.2, 149.4, 149.1, 143.9, 141.4, 131.9, 122.5, 120.0, 119.0, 115.7 (t,  $J$  = 262.0 Hz), 114.3, 114.0, 74.3, 10.1, 3.5. LC-MS:  $t_R$  = 4.68 min, purity: >99%,  $M/z$   $[M+H]^+$ : 369; HRMS calcd. For  $C_{17}H_{15}ClF_2N_2O_3$   $[M+H]^+$  = 369.0812, found 369.0806.

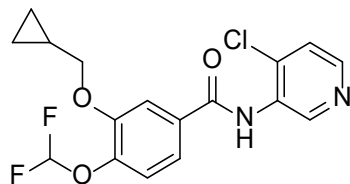

**N-(4-Chloropyridin-3-yl)-3-(cyclopropylmethoxy)-4-(difluoromethoxy)benzamide (NPD-1205)**

$^1\text{H}$  NMR (500 MHz, DMSO- $d_6$ )  $\delta$  10.37 (s, 1H), 8.68 (s, 1H), 8.46 (d,  $J$  = 5.3 Hz, 1H), 7.74 - 7.68 (m, 2H), 7.64 (dd,  $J$  = 8.4, 2.0 Hz, 1H), 7.40 - 7.08 (m, 2H), 3.99 (d,  $J$  = 7.0 Hz, 2H), 1.28 (m, 1H), 0.62 - 0.57 (m, 2H), 0.40 - 0.35 (m, 2H).  $^{13}\text{C}$  NMR (126 MHz, DMSO- $d_6$ )  $\delta$  164.7, 149.6, 149.6 (confirmed by HMBC), 148.2, 142.7 (t,  $J$  = 3.1 Hz), 140.0, 132.2, 131.2, 124.8, 120.7, 120.3, 116.5 (t,  $J$  = 258.3 Hz), 113.6, 73.3, 10.0, 3.1. LC-MS:  $t_R$  = 4.38 min, purity: >99%,  $M/z$   $[\text{M}+\text{H}]^+$ : 369; HRMS calcd. For  $\text{C}_{17}\text{H}_{15}\text{ClF}_2\text{N}_2\text{O}_3$   $[\text{M}+\text{H}]^+$  = 369.0812, found 369.0805.

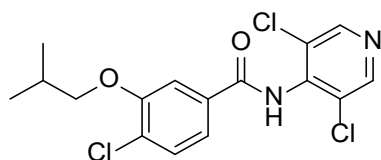

**4-Chloro-N-(3,5-dichloropyridin-4-yl)-3-isobutoxybenzamide (NPD-1206)**

$^1\text{H}$  NMR (500 MHz,  $\text{CDCl}_3$ )  $\delta$  8.59 – 8.50 (m, 3H), 8.46 (dd,  $J$  = 5.7, 3.0 Hz, 1H), 7.51 - 7.45 (m, 2H), 7.32 – 7.26 (m, 1H), 3.89 – 3.83 (m, 2H), 2.25 – 2.10 (m, 1H), 1.09 – 1.04 (m, 6H).  $^{13}\text{C}$  NMR (126 MHz, DMSO- $d_6$ )  $\delta$  166.2, 157.7, 150.7, 142.0, 134.4, 132.7, 131.1, 130.7, 121.7, 115.0, 77.9, 30.6, 21.5. LC-MS:  $t_R$  = 5.22 min, purity: 99%,  $M/z$   $[\text{M}+\text{H}]^+$ : 373; HRMS calcd. For  $\text{C}_{16}\text{H}_{15}\text{Cl}_3\text{N}_2\text{O}_2$   $[\text{M}+\text{Na}]^+$  = 395.0091, found 395.0073.

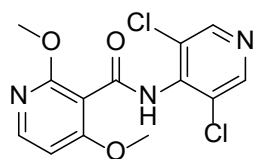

**N-(3,5-Dichloropyridin-4-yl)-2,4-dimethoxynicotinamide (NPD-1472)**

$^1\text{H}$  NMR (300 MHz, DMSO- $d_6$ )  $\delta$  9.97 (s, 1H), 8.73 (s, 2H), 8.21 (d,  $J$  = 8.3 Hz, 1H), 6.56 (d,  $J$  = 8.3 Hz, 1H), 4.08 (s, 3H), 3.97 (s, 3H).  $^{13}\text{C}$  NMR (126 MHz, DMSO- $d_6$ )  $\delta$  164.8, 161.5, 160.4, 148.1, 143.9, 141.5, 130.7, 106.6, 102.7, 54.2, 54.1. LC-MS:  $t_R$  = 4.58 min, purity: >99%,  $M/z$   $[\text{M}+\text{H}]^+$ : 328; HRMS calcd. For  $\text{C}_{13}\text{H}_{11}\text{Cl}_2\text{N}_3\text{O}_3$   $[\text{M}+\text{H}]^+$  = 328.0250, found 328.0254.

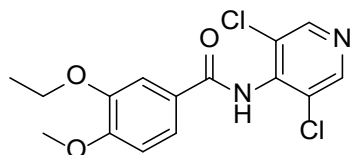

**N-(3,5-Dichloropyridin-4-yl)-3-ethoxy-4-methoxybenzamide (NPD-2976)**

$^1\text{H}$  NMR (600 MHz, DMSO- $d_6$ )  $\delta$  10.42 (s, 1H), 8.74 (s, 2H), 7.67 (dd,  $J$  = 8.5, 2.1 Hz, 1H), 7.56 (d,  $J$  = 2.1 Hz, 1H), 7.12 (d,  $J$  = 8.4 Hz, 1H), 4.09 (q,  $J$  = 7.0 Hz, 2H), 3.85 (s, 3H), 1.36 (t,  $J$  = 6.9 Hz, 3H).  $^{13}\text{C}$  NMR (151 MHz, DMSO- $d_6$ )  $\delta$  164.2, 152.4, 148.2, 147.7, 141.7 (confirmed by HMBC), 130.7, 124.8, 121.6, 112.0, 111.2, 63.9, 55.7, 14.7. LC-MS:  $t_R$  = 3.81 min, purity: >99%,  $M/z$   $[\text{M}+\text{H}]^+$ : 341; HRMS calcd. For  $\text{C}_{15}\text{H}_{14}\text{Cl}_2\text{N}_2\text{O}_3$   $[\text{M}+\text{H}]^+$  = 341.0454, found 341.0457. Spectral data are in agreement with a previous report. [4]

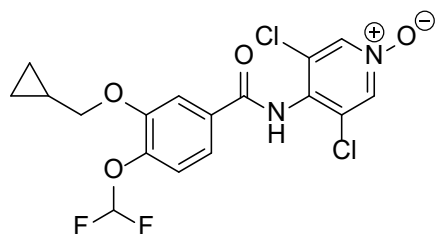

### 3,5-Dichloro-4-(3-(cyclopropylmethoxy)-4-(difluoromethoxy)benzamido)pyridine 1-oxide (NPD-2980)

To a stirred, ice-cooled (0 °C) solution of **NPD-0006** (0.15 g, 0.37 mmol) in DCM (15 mL) was added portion-wise *m*-CPBA (0.11 g, 0.48 mmol). The reaction mixture was warmed to room temperature and stirred overnight. Saturated aq.  $\text{NaHCO}_3$  (10 mL) was slowly added and the mixture was extracted with DCM (3 x 15 mL). The combined organic layers were washed with brine (50 mL), dried over  $\text{Na}_2\text{SO}_4$ , filtered and concentrated *in vacuo*. The crude product was purified with flash column chromatography using a gradient elution of EtOAc in cyclohexane (30% to 80%) to 5:1 as eluents to yield the title compound as a white solid.  $^1\text{H}$  NMR (600 MHz,  $\text{CDCl}_3$ )  $\delta$  8.25 (s, 2H), 7.82 (s, 1H), 7.58 (s, 1H), 7.46 (d,  $J$  = 8.3 Hz, 1H), 7.28 (d,  $J$  = 8.2 Hz, 1H), 6.74 (t,  $J$  = 74.8 Hz, 1H), 3.96 (d,  $J$  = 6.9 Hz, 2H), 1.36 - 1.27 (m, 1H), 0.70 - 0.65 (m, 2H), 0.40 - 0.36 (m, 2H).  $^{13}\text{C}$  NMR (151 MHz,  $\text{CDCl}_3$ )  $\delta$  164.4, 151.1, 144.1, 138.5, 131.8, 131.4, 130.6, 122.5, 119.9, 115.8 (t,  $J$  = 264.3 Hz), 114.3, 74.4, 10.1, 3.4. LC-MS:  $t_R$  = 4.01 min, purity: 98%,  $M/z$   $[\text{M}+\text{H}]^+$ : 419; HRMS calcd. For  $\text{C}_{17}\text{H}_{14}\text{Cl}_2\text{F}_2\text{N}_2\text{O}_4$   $[\text{M}+\text{H}]^+$  = 419.0371, found 419.0364. Spectral data are in agreement with a previous report. [5]

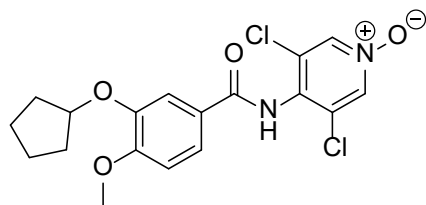

### 3,5-Dichloro-4-(3-(cyclopentyloxy)-4-methoxybenzamido)pyridine 1-oxide (NPD-2981)

Prepared from **NPD-0005** (0.15 g, 0.39 mmol) with *m*-CPBA (0.12 g, 0.51 mmol) as described for **NPD-2980** to give the title compound as a white solid.  $^1\text{H}$  NMR (500 MHz,  $\text{CDCl}_3$ )  $\delta$  8.28 (s, 2H), 7.74 (s, 1H), 7.59 - 7.43 (m, 2H), 6.93 (d,  $J$  = 7.8 Hz, 1H), 4.87 (s, 1H), 3.93 (s, 3H), 2.07 - 1.78 (m, 6H), 1.63 (app s, 2H).  $^{13}\text{C}$  NMR (126 MHz,  $\text{CDCl}_3$ )  $\delta$  164.6, 154.4, 148.2, 138.5, 134.4, 131.0, 124.5, 120.8, 114.3, 111.0, 80.9, 56.3, 32.9, 24.2. LC-MS:  $t_R$  = 3.74 min, purity: 97%,

M/z [M+H]<sup>+</sup>: 397; HRMS calcd. For C<sub>18</sub>H<sub>18</sub>Cl<sub>2</sub>N<sub>2</sub>O<sub>4</sub> [M+H]<sup>+</sup>= 397.0716, found 397.0705. Spectral data are in agreement with a previous report. [1]

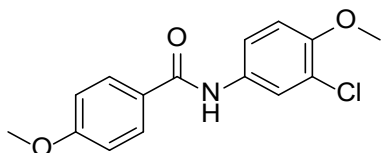

**N-(3-Chloro-4-methoxyphenyl)-4-methoxybenzamide (NPD-2991)**

<sup>1</sup>H NMR (500 MHz, CDCl<sub>3</sub>) δ 7.82 (d, *J* = 8.5 Hz, 2H), 7.71 - 7.65 (m, 2H), 7.50 (dd, *J* = 8.8, 2.1 Hz, 1H), 6.96 (d, *J* = 8.6 Hz, 2H), 6.91 (d, *J* = 8.8 Hz, 1H), 3.90 (s, 3H), 3.87 (s, 3H). <sup>13</sup>C NMR (126 MHz, CDCl<sub>3</sub>) δ 165.3, 162.7, 152.1, 131.7, 129.0, 126.8, 122.9, 122.6, 120.1, 114.1, 112.4, 56.5, 55.6. LC-MS: t<sub>R</sub>= 4.32 min, purity: >99%, M/z [M+H]<sup>+</sup>: 292; HRMS calcd. For C<sub>15</sub>H<sub>14</sub>ClNO<sub>3</sub> [M+H]<sup>+</sup>= 292.0735, found 292.0728.

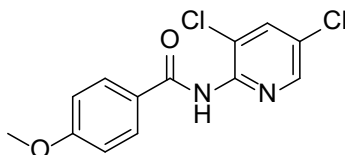

**N-(3,5-Dichloropyridin-2-yl)-4-methoxybenzamide (NPD-2992)**

<sup>1</sup>H NMR (500 MHz, CDCl<sub>3</sub>) δ 8.38 (d, *J* = 1.7 Hz, 1H), 8.30 (s, 1H), 7.90 (d, *J* = 8.7 Hz, 2H), 7.78 (d, *J* = 2.1 Hz, 1H), 6.99 (d, *J* = 8.7 Hz, 2H), 3.88 (s, 3H). <sup>13</sup>C NMR (126 MHz, CDCl<sub>3</sub>) δ 164.4, 163.2, 146.6, 145.6, 137.7, 129.7, 127.9, 126.0, 123.0, 114.2, 55.7. LC-MS: t<sub>R</sub>= 4.00 min, purity: >99%, M/z [M+H]<sup>+</sup>: 297; HRMS calcd. For C<sub>13</sub>H<sub>10</sub>Cl<sub>2</sub>N<sub>2</sub>O<sub>2</sub> [M+H]<sup>+</sup>= 297.0192, found 297.0186.

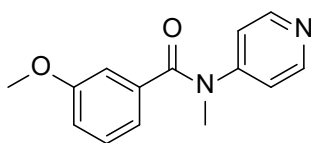

**3-Methoxy-N-methyl-N-(pyridin-4-yl)benzamide (NPD-2993)**

<sup>1</sup>H NMR (500 MHz, CDCl<sub>3</sub>) δ 8.44 (d, *J* = 4.6 Hz, 2H), 7.13 (t, *J* = 7.9 Hz, 1H), 6.96 (d, *J* = 6.0 Hz, 2H), 6.92 (s, 1H), 6.88 (dd, *J* = 8.2, 2.4 Hz, 1H), 6.83 (d, *J* = 7.6 Hz, 1H), 3.71 (s, 3H), 3.51 (s, 3H). <sup>13</sup>C NMR (126 MHz, CDCl<sub>3</sub>) δ 170.7, 159.5, 152.2, 150.6, 136.3, 129.4, 121.1, 120.2, 116.8, 113.9, 55.4, 37.5. LC-MS: t<sub>R</sub>= 2.48 min, purity: >99%, M/z [M+H]<sup>+</sup>: 243; HRMS calcd. For C<sub>14</sub>H<sub>14</sub>N<sub>2</sub>O<sub>2</sub> [M+H]<sup>+</sup>= 243.1128, found 243.1130.

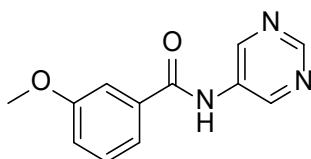

**3-Methoxy-*N*-(pyrimidin-5-yl)benzamide (NPD-2994)**

<sup>1</sup>H NMR (600 MHz, CDCl<sub>3</sub>) δ 9.20 (s, 2H), 9.01 (s, 1H), 8.17 (s, 1H), 7.48 - 7.39 (m, 3H), 7.13 (ddd, *J* = 7.9, 2.5, 1.1 Hz, 1H), 3.88 (s, 3H). <sup>13</sup>C NMR (151 MHz, CDCl<sub>3</sub>) δ 166.0, 160.3, 153.8, 148.2, 134.8, 133.9, 130.2, 119.1, 119.0, 112.9, 55.7. LC-MS: *t<sub>R</sub>* = 3.06 min, purity: >99%, *M/z* [M+H]<sup>+</sup>: 230; HRMS calcd. For C<sub>12</sub>H<sub>11</sub>N<sub>3</sub>O<sub>2</sub> [M+H]<sup>+</sup> = 230.0924, found 230.0916.

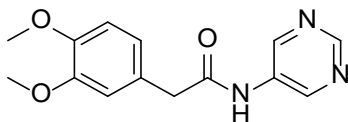**2-(3,4-Dimethoxyphenyl)-*N*-(pyrimidin-5-yl)acetamide (NPD-2995)**

<sup>1</sup>H NMR (500 MHz, CDCl<sub>3</sub>) δ 8.97 - 8.88 (m, 3H), 7.41 (s, 1H), 6.92 - 6.85 (m, 2H), 6.82 (s, 1H), 3.91 - 3.87 (m, 6H), 3.73 (s, 2H). <sup>13</sup>C NMR (126 MHz, CDCl<sub>3</sub>) δ 170.2, 154.3, 149.7, 149.0, 147.8, 133.3, 125.9, 121.9, 112.4, 111.9, 56.11, 56.07, 44.1. LC-MS: *t<sub>R</sub>* = 2.78 min, purity: >99%, *M/z* [M+H]<sup>+</sup>: 274; HRMS calcd. For C<sub>14</sub>H<sub>15</sub>N<sub>3</sub>O<sub>3</sub> [M+H]<sup>+</sup> = 274.1186, found 274.1190.

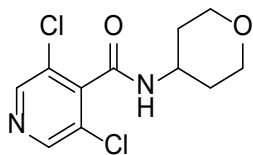**3,5-Dichloro-*N*-(tetrahydro-2H-pyran-4-yl)isonicotinamide (NPD-2996)**

<sup>1</sup>H NMR (500 MHz, CDCl<sub>3</sub>) δ 8.52 (s, 2H), 5.80 (d, *J* = 7.3 Hz, 1H), 4.31 - 4.22 (m, 1H), 3.98 (s, 2H), 3.58 - 3.49 (m, 2H), 2.08 - 2.02 (m, 2H), 1.66 - 1.53 (m, 2H). <sup>13</sup>C NMR (126 MHz, CDCl<sub>3</sub>) δ 161.4, 147.9, 142.2, 129.1, 66.7, 46.7, 32.9. LC-MS: *t<sub>R</sub>* = 2.78 min, purity: >99%, *M/z* [M+H]<sup>+</sup>: 275; HRMS calcd. For C<sub>11</sub>H<sub>12</sub>Cl<sub>2</sub>N<sub>2</sub>O<sub>2</sub> [M+H]<sup>+</sup> = 275.0349, found 275.0338.

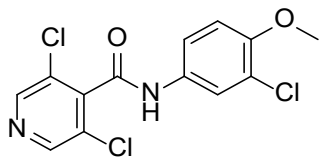**3,5-Dichloro-*N*-(3-chloro-4-methoxyphenyl)isonicotinamide (NPD-2997)**

<sup>1</sup>H NMR (500 MHz, CDCl<sub>3</sub>) δ 8.56 (s, 2H), 7.68 - 7.64 (m, 1H), 7.59 (s, 1H), 7.52 - 7.46 (m, 1H), 6.94 (d, *J* = 8.8 Hz, 1H), 3.92 (s, 3H). <sup>13</sup>C NMR (126 MHz, CDCl<sub>3</sub>) δ 160.1, 153.1, 148.0, 141.8, 129.9, 129.2, 123.3, 123.0, 120.5, 112.4, 56.6. LC-MS: *t<sub>R</sub>* = 4.26 min, purity: >99%, *M/z* [M+H]<sup>+</sup>: 331; HRMS calcd. For C<sub>13</sub>H<sub>9</sub>Cl<sub>3</sub>N<sub>2</sub>O<sub>2</sub> [M+H]<sup>+</sup> = 330.9802, found 330.9799.

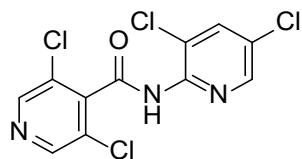

**3,5-Dichloro-*N*-(3,5-dichloropyridin-2-yl)isonicotinamide (NPD-2998)**

$^1\text{H}$  NMR (500 MHz,  $\text{DMSO-}d_6$ )  $\delta$  8.52 (s, 2H), 8.42 (s, 1H), 7.75 (s, 2H).  $^{13}\text{C}$  NMR (126 MHz,  $\text{DMSO-}d_6$ )  $\delta$  149.0, 147.5, 145.1, 144.2, 137.9, 128.5. Note: not all Carbon signals visible in spectrum. LC-MS:  $t_R$  = 4.07 min, purity: >99%,  $M/z$   $[\text{M}+\text{H}]^+$ : 338; HRMS calcd. For  $\text{C}_{11}\text{H}_5\text{Cl}_4\text{N}_3\text{O}$   $[\text{M}+\text{H}]^+$  = 335.9259, found 335.9260.

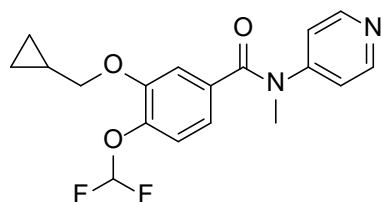

**3-(Cyclopropylmethoxy)-4-(difluoromethoxy)-*N*-methyl-*N*-(pyridin-4-yl)benzamide (NPD-2999)**

$^1\text{H}$  NMR (500 MHz,  $\text{CDCl}_3$ )  $\delta$  8.47 (d,  $J$  = 5.3 Hz, 2H), 7.04 - 6.98 (m, 4H), 6.85 (dd,  $J$  = 8.3, 2.0 Hz, 1H), 6.62 (t,  $J$  = 74.9 Hz, 1H), 3.74 (d,  $J$  = 7.0 Hz, 2H), 3.52 (s, 3H), 1.22 - 1.10 (m, 1H), 0.66 - 0.57 (m, 2H), 0.34 - 0.28 (m, 2H).  $^{13}\text{C}$  NMR (126 MHz,  $\text{CDCl}_3$ )  $\delta$  169.9, 152.7, 150.3, 149.8, 142.3, 132.8, 122.0, 121.9, 119.9, 115.8 (t,  $J$  = 260.5 Hz), 115.0, 74.1, 37.7, 10.0, 3.4. LC-MS:  $t_R$  = 3.60 min, purity: >99%,  $M/z$   $[\text{M}+\text{H}]^+$ : 349; HRMS calcd. For  $\text{C}_{18}\text{H}_{18}\text{F}_2\text{N}_2\text{O}_3$   $[\text{M}+\text{H}]^+$  = 349.1358, found 349.1363.

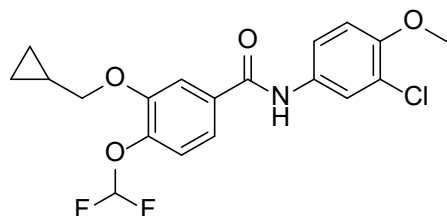

***N*-(3-Chloro-4-methoxyphenyl)-3-(cyclopropylmethoxy)-4-(difluoromethoxy)benzamide (NPD-3000)**

$^1\text{H}$  NMR (500 MHz,  $\text{CDCl}_3$ )  $\delta$  7.73 - 7.66 (m, 2H), 7.53 (s, 1H), 7.49 (d,  $J$  = 8.6 Hz, 1H), 7.31 (d,  $J$  = 8.0 Hz, 1H), 7.23 (d,  $J$  = 8.2 Hz, 1H), 6.93 (d,  $J$  = 8.8 Hz, 1H), 6.72 (t,  $J$  = 75.0 Hz, 1H), 3.94 (d,  $J$  = 6.9 Hz, 2H), 3.91 (s, 3H), 1.31 (m, 1H), 0.67 (app d,  $J$  = 7.6 Hz, 2H), 0.37 (app d,  $J$  = 4.5 Hz, 2H).  $^{13}\text{C}$  NMR (126 MHz,  $\text{CDCl}_3$ )  $\delta$  164.7, 152.4, 151.0, 143.1, 133.0, 131.3, 123.0, 122.8, 122.3, 120.2, 118.8, 115.9 (t,  $J$  = 260.4 Hz), 113.9, 112.4, 74.3, 56.5, 10.2, 3.4. LC-MS:  $t_R$  = 5.00 min, purity: >99%,  $M/z$   $[\text{M}+\text{H}]^+$ : 398; HRMS calcd. For  $\text{C}_{19}\text{H}_{18}\text{ClF}_2\text{NO}_4$   $[\text{M}+\text{H}]^+$  = 398.0965, found 398.0955.



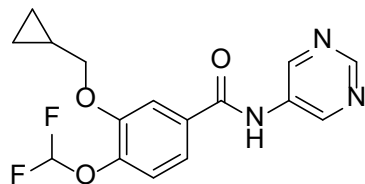

**3-(Cyclopropylmethoxy)-4-(difluoromethoxy)-N-(pyrimidin-5-yl)benzamide (NPD-3001)**

$^1\text{H}$  NMR (500 MHz,  $\text{CDCl}_3$ )  $\delta$  9.16 (s, 2H), 9.02 (s, 1H), 8.18 (s, 1H), 7.56 (s, 1H), 7.40 (d,  $J$  = 8.1 Hz, 1H), 7.24 (d,  $J$  = 8.1 Hz, 1H), 6.74 (t,  $J$  = 74.8 Hz, 1H), 3.95 (d,  $J$  = 6.9 Hz, 2H), 1.31 (tt,  $J$  = 12.7, 7.8 Hz, 1H), 0.67 (app q,  $J$  = 7.6 Hz, 2H), 0.37 (app q,  $J$  = 4.7 Hz, 2H).  $^{13}\text{C}$  NMR (126 MHz,  $\text{CDCl}_3$ )  $\delta$  165.2, 154.6, 151.1, 148.4, 143.7 (t,  $J$  = 3.2 Hz), 133.5, 131.6, 122.3, 119.2, 115.8 (t,  $J$  = 264.2 Hz), 114.0, 74.4, 10.1, 3.4. LC-MS:  $t_R$  = 4.09 min, purity: >99%,  $M/z$   $[\text{M}+\text{H}]^+$ : 336; HRMS calcd. For  $\text{C}_{16}\text{H}_{15}\text{F}_2\text{N}_3\text{O}_3$   $[\text{M}+\text{H}]^+$  = 336.1154, found 336.1145.

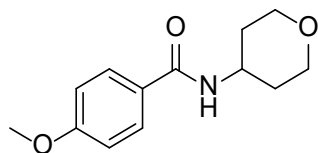

**4-Methoxy-N-(tetrahydro-2H-pyran-4-yl)benzamide (NPD-3002)**

$^1\text{H}$  NMR (500 MHz,  $\text{CDCl}_3$ )  $\delta$  7.66 (d,  $J$  = 8.0 Hz, 2H), 6.85 (d,  $J$  = 8.0 Hz, 2H), 5.90 (d,  $J$  = 6.2 Hz, 1H), 4.17 - 4.07 (m, 1H), 3.93 (app d,  $J$  = 10.2 Hz, 2H), 3.78 (s, 3H), 3.46 (app t,  $J$  = 11.7 Hz, 2H), 1.93 (app d,  $J$  = 12.5 Hz, 2H), 1.49 (app q,  $J$  = 11.8 Hz, 2H).  $^{13}\text{C}$  NMR (126 MHz,  $\text{CDCl}_3$ )  $\delta$  166.5, 162.4, 128.8, 126.9, 113.9, 67.1, 55.6, 46.3, 33.5. LC-MS:  $t_R$  = 3.01 min, purity: >99%,  $M/z$   $[\text{M}+\text{H}]^+$ : 236; HRMS calcd. For  $\text{C}_{13}\text{H}_{17}\text{NO}_3$   $[\text{M}+\text{H}]^+$  = 236.1281, found 236.1272.

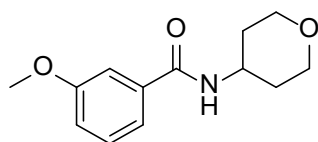

**3-Methoxy-N-(tetrahydro-2H-pyran-4-yl)benzamide (NPD-3003)**

$^1\text{H}$  NMR (500 MHz,  $\text{CDCl}_3$ )  $\delta$  7.30 - 7.25 (m, 2H), 7.24 - 7.18 (m, 1H), 6.98 (d,  $J$  = 8.1 Hz, 1H), 6.04 - 5.93 (m, 1H), 4.21 - 4.08 (m, 1H), 3.94 (app d,  $J$  = 10.6 Hz, 2H), 3.79 (s, 3H), 3.48 (app t,  $J$  = 11.7 Hz, 2H), 1.95 (app d,  $J$  = 12.6 Hz, 2H), 1.51 (app q,  $J$  = 11.9 Hz, 2H).  $^{13}\text{C}$  NMR (151 MHz,  $\text{CDCl}_3$ )  $\delta$  166.8, 160.0, 136.2, 129.7, 118.7, 117.7, 112.5, 67.0, 55.6, 46.4, 33.3. LC-MS:  $t_R$  = 3.10 min, purity: >99%,  $M/z$   $[\text{M}+\text{H}]^+$ : 236; HRMS calcd. For  $\text{C}_{13}\text{H}_{17}\text{NO}_3$   $[\text{M}+\text{H}]^+$  = 236.1281, found 236.1271.

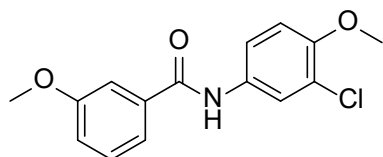

***N*-(3-Chloro-4-methoxyphenyl)-3-methoxybenzamide (NPD-3004)**

<sup>1</sup>H NMR (500 MHz, CDCl<sub>3</sub>) δ 7.86 (s, 1H), 7.68 (s, 1H), 7.50 (d, *J* = 8.8 Hz, 1H), 7.41 (s, 1H), 7.39 - 7.32 (m, 2H), 7.07 (s, 1H), 6.90 (d, *J* = 8.8 Hz, 1H), 3.89 (s, 3H), 3.85 (s, 3H). <sup>13</sup>C NMR (126 MHz, CDCl<sub>3</sub>) δ 165.5, 160.0, 152.1, 136.1, 131.4, 129.8, 122.8, 122.5, 120.0, 118.6, 118.1, 112.4, 112.2, 56.4, 55.5. LC-MS: *t*<sub>R</sub> = 4.39 min, purity: >99%, *M/z* [M+H]<sup>+</sup>: 292; HRMS calcd. For C<sub>15</sub>H<sub>14</sub>ClNO<sub>3</sub> [M+H]<sup>+</sup> = 292.0735, found 292.0721.

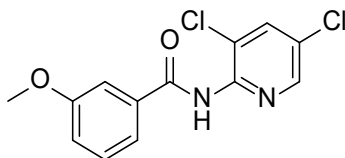***N*-(3,5-Dichloropyridin-2-yl)-3-methoxybenzamide (NPD-3005)**

<sup>1</sup>H NMR (500 MHz, CDCl<sub>3</sub>) δ 8.38 (s, 2H), 7.79 (s, 1H), 7.49 (s, 1H), 7.45 (d, *J* = 7.5 Hz, 1H), 7.41 (t, *J* = 7.7 Hz, 1H), 7.13 (d, *J* = 8.0 Hz, 1H), 3.88 (s, 3H). <sup>13</sup>C NMR (126 MHz, CDCl<sub>3</sub>) δ 164.8, 160.2, 146.3, 145.7, 137.7, 135.3, 130.1, 128.2, 123.1, 119.3, 118.9, 113.0, 55.7. LC-MS: *t*<sub>R</sub> = 4.06 min, purity: >99%, *M/z* [M+H]<sup>+</sup>: 297; HRMS calcd. For C<sub>13</sub>H<sub>10</sub>Cl<sub>2</sub>N<sub>2</sub>O<sub>2</sub> [M+H]<sup>+</sup> = 297.0192, found 297.0182.

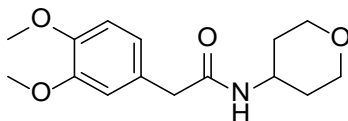**2-(3,4-Dimethoxyphenyl)-*N*-(tetrahydro-2H-pyran-4-yl)acetamide (NPD-3006)**

<sup>1</sup>H NMR (500 MHz, CDCl<sub>3</sub>) δ 6.85 (d, *J* = 7.9 Hz, 1H), 6.80 - 6.75 (m, 2H), 5.29 (d, *J* = 7.4 Hz, 1H), 4.03 - 3.93 (m, 1H), 3.91 - 3.86 (m, 8H), 3.50 (s, 2H), 3.44 (app t, *J* = 11.6 Hz, 2H), 1.82 (app d, *J* = 12.7 Hz, 2H), 1.33 (app q, *J* = 11.7 Hz, 2H). <sup>13</sup>C NMR (151 MHz, CDCl<sub>3</sub>) δ 170.7, 149.4, 148.5, 127.3, 121.7, 112.5, 111.7, 66.8, 56.1, 56.1, 45.8, 43.6, 33.1. LC-MS: *t*<sub>R</sub> = 2.78 min, purity: >99%, *M/z* [M+H]<sup>+</sup>: 280; HRMS calcd. For C<sub>15</sub>H<sub>21</sub>NO<sub>4</sub> [M+H]<sup>+</sup> = 280.1543, found 280.1531.

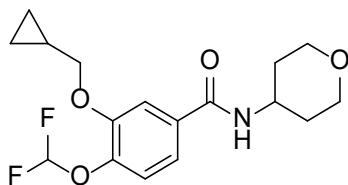**3-(Cyclopropylmethoxy)-4-(difluoromethoxy)-*N*-(tetrahydro-2H-pyran-4-yl)benzamide (NPD-3007)**

<sup>1</sup>H NMR (500 MHz, CDCl<sub>3</sub>) δ 7.46 (s, 1H), 7.23 - 7.14 (m, 2H), 6.69 (t, *J* = 75.1 Hz, 1H), 5.95 (d, *J* = 6.7 Hz, 1H), 4.24 - 4.12 (m, 1H), 4.00 (app d, *J* = 10.8 Hz, 2H), 3.93 (app d, *J* = 6.8 Hz, 2H), 3.53 (app t, *J* = 11.7 Hz, 2H), 2.00 (app d, *J* = 12.0 Hz, 2H), 1.65 - 1.54 (m, 2H), 1.36 - 1.22 (m, 1H), 0.66 (app d, *J* = 7.0 Hz, 2H), 0.36 (app s, 2H). <sup>13</sup>C NMR (151 MHz, CDCl<sub>3</sub>) δ 165.9, 150.8, 142.9 (t, *J* = 3.1 Hz), 122.3, 118.7, 115.9 (t, *J* = 261.1 Hz), 113.9, 74.3, 66.9, 46.6, 33.3, 10.2,

3.4. LC-MS:  $t_R$  = 4.15 min, purity: >99%,  $M/z$   $[M+H]^+$ : 342; HRMS calcd. For  $C_{17}H_{21}F_2NO_4$   $[M+H]^+$  = 342.1511, found 342.1509.

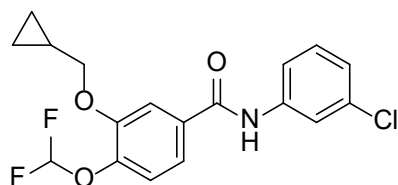

**N-(3-Chlorophenyl)-3-(cyclopropylmethoxy)-4-(difluoromethoxy)benzamide (NPD-3075)**

$^1H$  NMR (500 MHz,  $CDCl_3$ )  $\delta$  7.80 (s, 1H), 7.76 (app t,  $J$  = 2.0 Hz, 1H), 7.53 (d,  $J$  = 2.0 Hz, 1H), 7.49 - 7.45 (m, 1H), 7.34 - 7.27 (m, 2H), 7.24 (d,  $J$  = 8.2 Hz, 1H), 7.14 (ddd,  $J$  = 8.0, 1.9, 0.9 Hz, 1H), 6.72 (t,  $J$  = 74.9 Hz, 1H), 3.94 (d,  $J$  = 7.0 Hz, 2H), 1.35 - 1.27 (m, 1H), 0.69 - 0.65 (m, 2H), 0.39 - 0.35 (m, 2H).  $^{13}C$  NMR (126 MHz,  $CDCl_3$ )  $\delta$  164.8, 151.0, 143.3, 138.9, 135.0, 132.9, 130.3, 124.9, 122.4, 120.4, 118.8, 118.2, 115.9 (t,  $J$  = 263.6 Hz), 113.9, 74.3, 10.1, 3.4. LC-MS:  $t_R$  = 5.18 min, purity: >99%,  $M/z$   $[M+H]^+$ : 368; HRMS calcd. For  $C_{18}H_{16}ClF_2NO_3$   $[M+H]^+$  = 368.0860, found 368.0854.

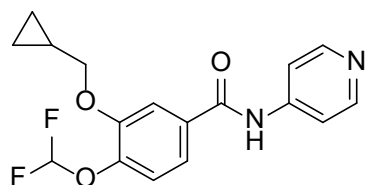

**3-(Cyclopropylmethoxy)-4-(difluoromethoxy)-N-(pyridin-4-yl)benzamide (NPD-3076)**

$^1H$  NMR (500 MHz,  $CDCl_3$ )  $\delta$  8.55 (d,  $J$  = 5.1 Hz, 2H), 8.14 (s, 1H), 7.61 (d,  $J$  = 5.1 Hz, 2H), 7.53 (s, 1H), 7.35 (d,  $J$  = 8.2 Hz, 1H), 7.24 (d,  $J$  = 8.2 Hz, 1H), 6.73 (t,  $J$  = 74.8 Hz, 1H), 3.94 (d,  $J$  = 6.9 Hz, 2H), 1.31 (m, 1H), 0.67 (app d,  $J$  = 7.3 Hz, 2H), 0.37 (app d,  $J$  = 4.4 Hz, 2H).  $^{13}C$  NMR (151 MHz,  $DMSO-d_6$ )  $\delta$  165.3, 151.1, 150.9, 145.1, 143.1 (t,  $J$  = 3.1 Hz), 132.4, 122.3, 119.1, 115.8 (t,  $J$  = 264.7 Hz), 114.0, 114.0, 74.3, 10.1, 3.4. LC-MS:  $t_R$  = 3.54 min, purity: >99%,  $M/z$   $[M+H]^+$ : 335; HRMS calcd. For  $C_{17}H_{16}F_2N_2O_3$   $[M+H]^+$  = 335.1202, found 335.1209.

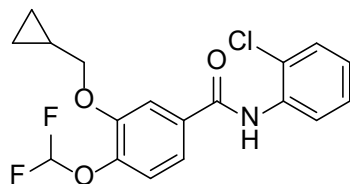

**N-(2-Chlorophenyl)-3-(cyclopropylmethoxy)-4-(difluoromethoxy)benzamide (NPD-3080)**

$^1H$  NMR (500 MHz,  $CDCl_3$ )  $\delta$  8.52 (dd,  $J$  = 8.3, 1.5 Hz, 1H), 8.40 (s, 1H), 7.59 (d,  $J$  = 2.0 Hz, 1H), 7.44 - 7.38 (m, 2H), 7.36 - 7.32 (m, 1H), 7.27 (d,  $J$  = 8.2 Hz, 1H), 7.10 (app td,  $J$  = 7.8, 1.5 Hz, 1H), 6.73 (app t,  $J$  = 74.9 Hz, 1H), 3.97 (d,  $J$  = 7.0 Hz, 2H), 1.37 - 1.29 (m, 1H), 0.71 - 0.65 (m, 2H), 0.42 - 0.36 (m, 2H).  $^{13}C$  NMR (126 MHz,  $CDCl_3$ )  $\delta$  164.4, 151.0, 143.4, 134.6, 133.1, 129.2, 128.1, 125.1, 123.2, 122.5, 121.6, 118.9, 115.9 (t,  $J$  = 261.6 Hz), 114.0, 74.2, 10.2, 3.4. LC-MS:  $t_R$  =

5.08 min, purity: >99%, M/z [M+H]<sup>+</sup>: 368; HRMS calcd. For C<sub>18</sub>H<sub>16</sub>ClF<sub>2</sub>NO<sub>3</sub> [M+H]<sup>+</sup>= 368.0860, found 368.0851.

Spectral data are in agreement with a previous report. [6]

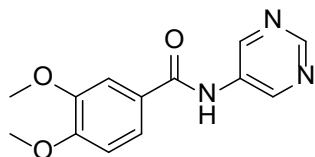

**3,4-Dimethoxy-N-(pyrimidin-5-yl)benzamide (NPD-3081)**

<sup>1</sup>H NMR (500 MHz, CDCl<sub>3</sub>) δ 9.11 (s, 2H), 9.00 (s, 1H), 8.01 (s, 1H), 7.50 (s, 1H), 7.44 (d, *J* = 8.3 Hz, 1H), 6.92 (d, *J* = 8.2 Hz, 1H), 3.95 (app s, 6H). <sup>13</sup>C NMR (126 MHz, CDCl<sub>3</sub>) δ 165.7, 154.3, 152.9, 149.5, 148.2, 133.8, 125.9, 120.0, 110.9, 110.5, 56.3, 56.3. LC-MS: t<sub>R</sub> = 2.82 min, purity: 97%, M/z [M+H]<sup>+</sup>: 260; HRMS calcd. For C<sub>13</sub>H<sub>13</sub>N<sub>3</sub>O<sub>3</sub> [M+H]<sup>+</sup>= 260.1030, found 260.1024.

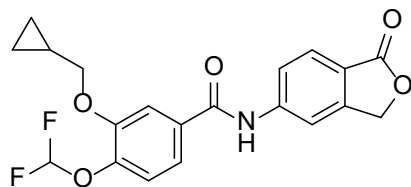

**3-(Cyclopropylmethoxy)-4-(difluoromethoxy)-N-(1-oxo-1,3-dihydroisobenzofuran-5-yl)benzamide (NPD-3083)**

<sup>1</sup>H NMR (500 MHz, CDCl<sub>3</sub>) δ 8.23 (s, 2H), 7.87 (d, *J* = 8.2 Hz, 1H), 7.55 (s, 1H), 7.47 (d, *J* = 8.2 Hz, 1H), 7.39 (d, *J* = 8.1 Hz, 1H), 7.29 - 7.24 (m, 1H), 6.73 (t, *J* = 74.8 Hz, 1H), 5.32 (s, 2H), 3.96 (d, *J* = 6.9 Hz, 2H), 1.32 (m, 1H), 0.68 (app q, *J* = 5.4 Hz, 2H), 0.38 (app q, *J* = 4.8 Hz, 2H). <sup>13</sup>C NMR (126 MHz, CDCl<sub>3</sub>) δ 170.7, 165.0, 150.9, 148.6, 143.4 (t, *J* = 3.1 Hz), 143.2, 132.4, 126.7, 122.3, 121.3, 120.6, 119.0, 115.7 (t, *J* = 261.1 Hz), 113.8, 112.7, 74.2, 69.6, 10.0, 3.3. LC-MS: t<sub>R</sub> = 4.55 min, purity: 98%, M/z [M+H]<sup>+</sup>: 390; HRMS calcd. For C<sub>20</sub>H<sub>17</sub>F<sub>2</sub>NO<sub>5</sub> [M+H]<sup>+</sup>= 390.1148, found 390.1140.

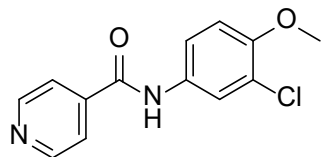

**N-(3-chloro-4-methoxyphenyl)isonicotinamide (NPD-3085)**

<sup>1</sup>H NMR (500 MHz, CDCl<sub>3</sub>) δ 8.80 (d, *J* = 3.5 Hz, 2H), 7.83 (s, 1H), 7.70 (app s, 3H), 7.52 (d, *J* = 8.6 Hz, 1H), 6.94 (d, *J* = 8.7 Hz, 1H), 3.92 (s, 3H). <sup>13</sup>C NMR (126 MHz, CDCl<sub>3</sub>) δ 163.7, 152.7, 151.0, 141.8, 130.7, 123.1, 122.9, 120.9, 120.3, 112.3, 56.5. LC-MS: t<sub>R</sub> = 3.33 min, purity: >99%, M/z [M+H]<sup>+</sup>: 263; HRMS calcd. For C<sub>13</sub>H<sub>11</sub>ClN<sub>2</sub>O<sub>2</sub> [M+H]<sup>+</sup>= 263.0582, found 263.0586.

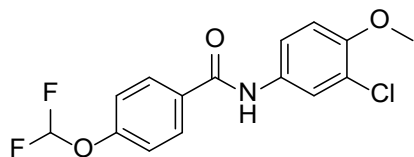

**N-(3-Chloro-4-methoxyphenyl)-4-(difluoromethoxy)benzamide (NPD-3086)**

$^1\text{H}$  NMR (500 MHz,  $\text{CDCl}_3$ )  $\delta$  7.87 (d,  $J$  = 7.7 Hz, 2H), 7.76 (s, 1H), 7.67 (s, 1H), 7.49 (d,  $J$  = 8.8 Hz, 1H), 7.20 (d,  $J$  = 7.8 Hz, 2H), 6.91 (d,  $J$  = 8.8 Hz, 1H), 6.59 (t,  $J$  = 73.1 Hz, 1H), 3.90 (s, 3H).  $^{13}\text{C}$  NMR (126 MHz,  $\text{CDCl}_3$ )  $\delta$  164.6, 153.8 (t,  $J$  = 2.7 Hz), 152.2, 131.5, 131.2, 129.0, 123.0, 122.6, 120.2, 119.3, 115.4 (t,  $J$  = 261.5 Hz), 112.2, 56.4. LC-MS:  $t_R$  = 4.57 min, purity: >99%,  $M/z$   $[\text{M}+\text{H}]^+$ : 328; HRMS calcd. For  $\text{C}_{15}\text{H}_{12}\text{ClF}_2\text{NO}_3$   $[\text{M}+\text{H}]^+$  = 328.0547, found 328.0540.

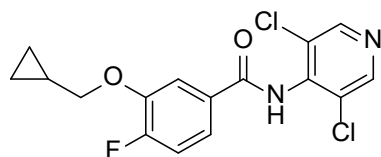

**3-(Cyclopropylmethoxy)-N-(3,5-dichloropyridin-4-yl)-4-fluorobenzamide (NPD-3093)**

$^1\text{H}$  NMR (500 MHz,  $\text{CDCl}_3$ )  $\delta$  8.57 (s, 2H), 7.68 (s, 1H), 7.59 (dd,  $J$  = 8.0, 2.1 Hz, 1H), 7.46 (ddd,  $J$  = 8.3, 4.0, 2.2 Hz, 1H), 7.20 (dd,  $J$  = 10.5, 8.4 Hz, 1H), 3.96 (d,  $J$  = 7.0 Hz, 2H), 1.38 - 1.29 (m, 1H), 0.71 - 0.65 (m, 2H), 0.38 (app q,  $J$  = 4.8 Hz, 2H).  $^{13}\text{C}$  NMR (126 MHz,  $\text{CDCl}_3$ )  $\delta$  163.8, 155.8 (d,  $J$  = 254.3 Hz), 148.5, 147.9 (d,  $J$  = 10.9 Hz), 139.9, 129.2 (d,  $J$  = 3.2 Hz), 128.9, 120.3 (d,  $J$  = 8.2 Hz), 116.5 (d,  $J$  = 19.5 Hz), 115.2 (d,  $J$  = 3.2 Hz), 74.6, 10.2, 3.5. LC-MS:  $t_R$  = 4.52 min, purity: 96%,  $M/z$   $[\text{M}+\text{H}]^+$ : 355; HRMS calcd. For  $\text{C}_{16}\text{H}_{13}\text{Cl}_2\text{FN}_2\text{O}_2$   $[\text{M}+\text{H}]^+$  = 355.0411, found 355.0398.

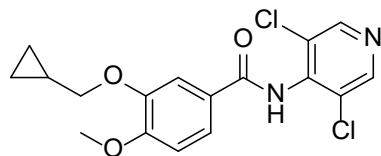

**3-(Cyclopropylmethoxy)-N-(3,5-dichloropyridin-4-yl)-4-methoxybenzamide (NPD-3094)**

$^1\text{H}$  NMR (500 MHz,  $\text{CDCl}_3$ )  $\delta$  8.57 (s, 2H), 7.73 - 7.48 (m, 3H), 6.97 (d,  $J$  = 7.9 Hz, 1H), 4.05 - 3.85 (m, 5H), 1.45 - 1.33 (m, 1H), 0.69 (app d,  $J$  = 7.2 Hz, 2H), 0.47 - 0.31 (m, 2H).  $^{13}\text{C}$  NMR (126 MHz,  $\text{CDCl}_3$ )  $\delta$  164.3, 153.6, 148.9, 148.4, 140.3, 128.7, 125.1, 121.0, 112.9, 110.8, 74.3, 56.3, 10.3, 3.6. LC-MS:  $t_R$  = 4.17 min, purity: 98%,  $M/z$   $[\text{M}+\text{H}]^+$ : 367; HRMS calcd. For  $\text{C}_{17}\text{H}_{16}\text{Cl}_2\text{N}_2\text{O}_3$   $[\text{M}+\text{H}]^+$  = 367.0611, found 367.0593.

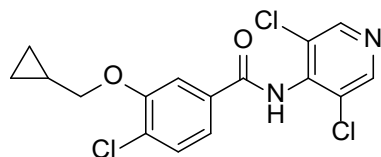

**4-Chloro-3-(cyclopropylmethoxy)-N-(3,5-dichloropyridin-4-yl)benzamide (NPD-3096)**

$^1\text{H}$  NMR (500 MHz,  $\text{CDCl}_3$ )  $\delta$  8.58 (s, 2H), 7.69 (s, 1H), 7.56 - 7.48 (m, 2H), 7.40 (dd,  $J$  = 8.1, 1.6 Hz, 1H), 3.98 (d,  $J$  = 6.8 Hz, 2H), 1.39 - 1.30 (m, 1H), 0.68 (app q,  $J$  = 5.5 Hz, 2H), 0.41 (app q,  $J$  = 5.1 Hz, 2H).  $^{13}\text{C}$  NMR (126 MHz,  $\text{CDCl}_3$ )  $\delta$  163.9, 155.3, 148.5, 139.8, 132.3, 130.7, 129.0, 128.6, 119.7, 113.3, 74.3, 10.1, 3.5. LC-MS:  $t_R$  = 4.81 min, purity: >99%,  $M/z$   $[\text{M}+\text{H}]^+$ : 371; HRMS calcd. For  $\text{C}_{16}\text{H}_{13}\text{Cl}_3\text{N}_2\text{O}_2$   $[\text{M}+\text{H}]^+$  = 371.0115, found 371.0101.

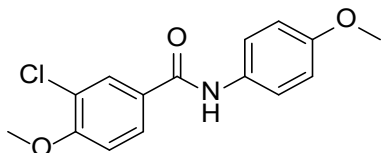

**3-Chloro-4-methoxy-N-(4-methoxyphenyl)benzamide (NPD-3286)**

$^1\text{H}$  NMR (600 MHz,  $\text{CDCl}_3$ )  $\delta$  7.89 (d,  $J$  = 2.1 Hz, 1H), 7.78 (dd,  $J$  = 8.6, 2.2 Hz, 1H), 7.63 (s, 1H), 7.51 (d,  $J$  = 8.7 Hz, 2H), 6.99 (d,  $J$  = 8.5 Hz, 1H), 6.91 (d,  $J$  = 8.9 Hz, 2H), 3.97 (s, 3H), 3.82 (s, 3H).  $^{13}\text{C}$  NMR (151 MHz,  $\text{CDCl}_3$ )  $\delta$  164.0, 157.7, 156.7, 130.8, 129.1, 128.0, 127.2, 122.8, 122.2, 114.3, 111.6, 56.4, 55.5. LC-MS:  $t_R$  = 4.25 min, purity: >99%,  $M/z$   $[\text{M}+\text{H}]^+$ : 292; HRMS calcd. For  $\text{C}_{15}\text{H}_{14}\text{ClNO}_3$   $[\text{M}+\text{H}]^+$  = 292.0735, found 292.0729.

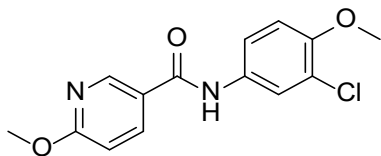

**N-(3-Chloro-4-methoxyphenyl)-6-methoxynicotinamide (NPD-3287)**

$^1\text{H}$  NMR (600 MHz,  $\text{CDCl}_3$ )  $\delta$  8.70 (s, 1H), 8.09 (d,  $J$  = 8.3 Hz, 1H), 7.70 (s, 1H), 7.64 (s, 1H), 7.51 (d,  $J$  = 7.9 Hz, 1H), 6.95 (d,  $J$  = 8.7 Hz, 1H), 6.86 (d,  $J$  = 8.5 Hz, 1H), 4.03 (s, 3H), 3.93 (s, 3H).  $^{13}\text{C}$  NMR (151 MHz,  $\text{CDCl}_3$ )  $\delta$  166.4, 163.9, 152.4, 146.5, 138.0, 131.3, 123.9, 123.2, 122.8, 120.3, 112.4, 111.3, 56.6, 54.3. LC-MS:  $t_R$  = 4.06 min, purity: 99%,  $M/z$   $[\text{M}+\text{H}]^+$ : 293; HRMS calcd. For  $\text{C}_{14}\text{H}_{13}\text{ClN}_2\text{O}_3$   $[\text{M}+\text{H}]^+$  = 293.0687, found 293.0676.

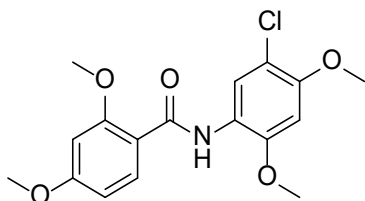

**N-(5-Chloro-2,4-dimethoxyphenyl)-2,4-dimethoxybenzamide (NPD-3288)**

$^1\text{H}$  NMR (300 MHz,  $\text{CDCl}_3$ )  $\delta$  9.87 (s, 1H), 7.98 (d,  $J$  = 9.0 Hz, 1H), 7.72 (d,  $J$  = 2.5 Hz, 1H), 7.58 (dd,  $J$  = 8.9, 2.5 Hz, 1H), 6.92 (d,  $J$  = 8.9 Hz, 1H), 6.83 (d,  $J$  = 9.0 Hz, 1H), 4.07 (s, 3H), 3.93 (s, 3H), 3.92 - 3.88 (m, 6H).  $^{13}\text{C}$  NMR (151 MHz,  $\text{CDCl}_3$ )  $\delta$  162.8, 157.0, 152.3, 151.8, 141.9, 132.4, 127.1, 122.7, 122.6, 119.8, 118.8, 112.5, 108.0, 62.1, 61.2, 56.6, 56.3. LC-MS:  $t_R$  = 4.61 min, purity: >99%,  $M/z$   $[\text{M}+\text{H}]^+$ : 352; HRMS calcd. For  $\text{C}_{17}\text{H}_{18}\text{ClNO}_5$   $[\text{M}+\text{H}]^+$  = 352.0946, found 352.0945.

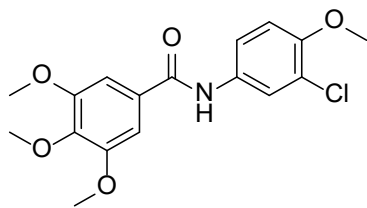

**N-(3-Chloro-4-methoxyphenyl)-3,4,5-trimethoxybenzamide (NPD-3289)**

$^1\text{H}$  NMR (600 MHz,  $\text{CDCl}_3$ )  $\delta$  7.68 (s, 1H), 7.66 (d,  $J$  = 2.5 Hz, 1H), 7.53 (dd,  $J$  = 8.8, 2.5 Hz, 1H), 7.06 (s, 2H), 6.93 (d,  $J$  = 8.9 Hz, 1H), 3.92 (app s, 6H), 3.91 (s, 3H), 3.90 (s, 3H).  $^{13}\text{C}$  NMR (151 MHz,  $\text{CDCl}_3$ )  $\delta$  165.5, 153.5, 152.3, 141.5, 131.5, 130.2, 123.0, 122.8, 120.2, 112.4, 104.6, 61.1, 56.6. Note: Carbon signals of the two non-equivalent methoxy groups overlap. LC-MS:  $t_R$  = 4.23 min, purity: >99%,  $M/z$   $[\text{M}+\text{H}]^+$ : 352; HRMS calcd. For  $\text{C}_{17}\text{H}_{18}\text{ClNO}_5$   $[\text{M}+\text{H}]^+$  = 352.0946, found 352.0940.

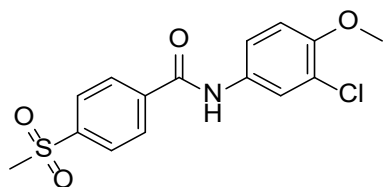

**N-(3-Chloro-4-methoxyphenyl)-4-(methylsulfonyl)benzamide (NPD-3290)**

$^1\text{H}$  NMR (300 MHz,  $\text{CDCl}_3$  +  $\text{DMSO}-d_6$ )  $\delta$  10.16 (s, 1H), 8.14 (d,  $J$  = 8.4 Hz, 2H), 7.96 (d,  $J$  = 8.4 Hz, 2H), 7.83 (d,  $J$  = 2.4 Hz, 1H), 7.62 - 7.57 (m, 1H), 6.89 (d,  $J$  = 8.9 Hz, 1H), 3.82 (s, 3H), 3.07 (s, 3H).  $^{13}\text{C}$  NMR (151 MHz,  $\text{CDCl}_3$  +  $\text{DMSO}-d_6$ )  $\delta$  163.2, 150.6, 142.0, 138.8, 131.4, 127.9, 126.3, 122.0, 120.7, 119.5, 111.2, 55.3, 43.3. LC-MS:  $t_R$  = 3.83 min, purity: 97%,  $M/z$   $[\text{M}+\text{H}]^+$ : 340; HRMS calcd. For  $\text{C}_{15}\text{H}_{14}\text{ClNO}_4\text{S}$   $[\text{M}+\text{H}]^+$  = 340.0405, found 340.0400.

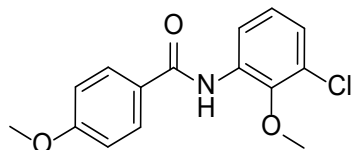

**N-(3-Chloro-2-methoxyphenyl)-4-methoxybenzamide (NPD-3291)**

$^1\text{H}$  NMR (300 MHz,  $\text{CDCl}_3$ )  $\delta$  8.48 (s, 1H), 8.43 (dd,  $J$  = 5.8, 4.0 Hz, 1H), 7.86 (d,  $J$  = 8.8 Hz, 2H), 7.11 (s, 1H), 7.10 (d,  $J$  = 1.9 Hz, 1H), 7.01 (d,  $J$  = 8.8 Hz, 2H), 3.95 (s, 3H), 3.89 (s, 3H).  $^{13}\text{C}$  NMR (151 MHz,  $\text{CDCl}_3$ )  $\delta$  165.0, 162.9, 145.2, 133.5, 129.1, 127.0, 126.9, 125.5, 125.0, 119.0, 114.3, 61.1, 55.7. LC-MS:  $t_R$  = 4.65 min, purity: >99%,  $M/z$   $[\text{M}+\text{H}]^+$ : 292; HRMS calcd. For  $\text{C}_{15}\text{H}_{14}\text{ClNO}_3$   $[\text{M}+\text{H}]^+$  = 292.0735, found 292.0726.

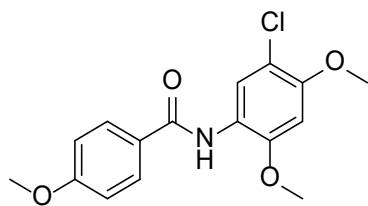

**N-(5-Chloro-2,4-dimethoxyphenyl)-4-methoxybenzamide (NPD-3292)**

$^1\text{H}$  NMR (300 MHz,  $\text{CDCl}_3$ )  $\delta$  8.60 (s, 1H), 8.25 (s, 1H), 7.86 (d,  $J$  = 8.8 Hz, 2H), 7.01 (d,  $J$  = 8.8 Hz, 2H), 6.58 (s, 1H), 3.97 (s, 3H), 3.93 (s, 3H), 3.90 (s, 3H).  $^{13}\text{C}$  NMR (151 MHz,  $\text{CDCl}_3$ )  $\delta$  164.6, 162.6, 151.4, 147.9, 129.0, 127.4, 122.0, 121.7, 114.14, 114.11, 96.8, 56.9, 56.4, 55.6. LC-MS:  $t_R$  = 4.46 min, purity: >99%,  $M/z$   $[\text{M}+\text{H}]^+$ : 322; HRMS calcd. For  $\text{C}_{16}\text{H}_{16}\text{ClNO}_4$   $[\text{M}+\text{H}]^+$  = 322.0841, found 322.0840.

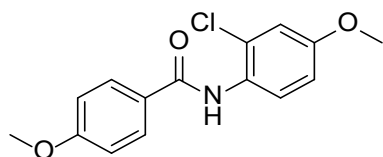

**N-(2-Chloro-4-methoxyphenyl)-4-methoxybenzamide (NPD-3293)**

$^1\text{H}$  NMR (300 MHz,  $\text{CDCl}_3$ )  $\delta$  8.38 (d,  $J$  = 9.1 Hz, 1H), 8.14 (s, 1H), 7.88 (d,  $J$  = 8.8 Hz, 2H), 7.04 - 6.94 (m, 3H), 6.88 (dd,  $J$  = 9.1, 2.8 Hz, 1H), 3.88 (s, 3H), 3.81 (s, 3H).  $^{13}\text{C}$  NMR (151 MHz,  $\text{CDCl}_3$ )  $\delta$  164.8, 162.8, 156.3, 129.1, 128.4, 127.1, 124.3, 123.0, 114.7, 114.2, 113.4, 55.9, 55.6. LC-MS:  $t_R$  = 4.26 min, purity: >99%,  $M/z$   $[\text{M}+\text{H}]^+$ : 292; HRMS calcd. For  $\text{C}_{15}\text{H}_{14}\text{ClNO}_3$   $[\text{M}+\text{H}]^+$  = 292.0735, found 292.0728.

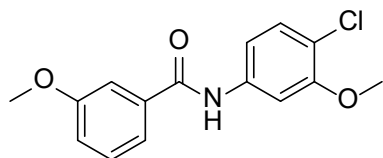

**N-(4-Chloro-3-methoxyphenyl)-3-methoxybenzamide (NPD-3294)**

$^1\text{H}$  NMR (300 MHz,  $\text{CDCl}_3$ )  $\delta$  7.81 (s, 1H), 7.72 (d,  $J$  = 2.2 Hz, 1H), 7.43 (s, 1H), 7.39 (app d,  $J$  = 7.2 Hz, 2H), 7.32 (d,  $J$  = 8.5 Hz, 1H), 7.10 (m, 1H), 6.90 (dd,  $J$  = 8.5, 2.3 Hz, 1H), 3.95 (s, 3H), 3.88 (s, 3H).  $^{13}\text{C}$  NMR (151 MHz,  $\text{CDCl}_3$ )  $\delta$  165.7, 160.2, 155.5, 137.9, 136.2, 130.2, 130.0, 118.7, 118.4, 117.9, 112.6, 112.3, 104.7, 56.4, 55.7. LC-MS:  $t_R$  = 4.46 min, purity: >99%,  $M/z$   $[\text{M}+\text{H}]^+$ : 292; HRMS calcd. For  $\text{C}_{15}\text{H}_{14}\text{ClNO}_3$   $[\text{M}+\text{H}]^+$  = 292.0735, found 292.0725.

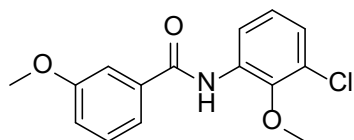

**N-(3-Chloro-2-methoxyphenyl)-3-methoxybenzamide (NPD-3295)**



$^1\text{H}$  NMR (300 MHz,  $\text{CDCl}_3$ )  $\delta$  8.38 (d,  $J = 9.1$  Hz, 1H), 8.21 (s, 1H), 7.51 - 7.45 (m, 1H), 7.42 (app d,  $J = 6.6$  Hz, 2H), 7.10 (m, 1H), 6.98 (d,  $J = 2.8$  Hz, 1H), 6.89 (dd,  $J = 9.1, 2.8$  Hz, 1H), 3.89 (s, 3H), 3.81 (s, 3H).  $^{13}\text{C}$  NMR (151 MHz,  $\text{CDCl}_3$ )  $\delta$  165.2, 160.2, 156.5, 136.4, 130.0, 128.2, 124.4, 123.1, 118.8, 118.3, 114.7, 113.5, 112.7, 55.9, 55.6. LC-MS:  $t_R = 4.33$  min, purity: >99%,  $M/z$   $[\text{M}+\text{H}]^+$ : 292; HRMS calcd. For  $\text{C}_{15}\text{H}_{14}\text{ClNO}_3$   $[\text{M}+\text{H}]^+ = 292.0735$ , found 292.0732.

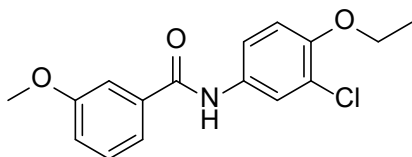

**N-(3-Chloro-4-ethoxyphenyl)-3-methoxybenzamide (NPD-3296)**

$^1\text{H}$  NMR (300 MHz,  $\text{CDCl}_3$ )  $\delta$  7.71 (s, 1H), 7.68 (d,  $J = 2.6$  Hz, 1H), 7.49 (dd,  $J = 8.9, 2.6$  Hz, 1H), 7.44 - 7.40 (m, 1H), 7.40 - 7.33 (m, 2H), 7.08 (m, 1H), 6.92 (d,  $J = 8.9$  Hz, 1H), 4.11 (q,  $J = 7.0$  Hz, 2H), 3.87 (s, 3H), 1.47 (t,  $J = 7.0$  Hz, 3H).  $^{13}\text{C}$  NMR (151 MHz,  $\text{CDCl}_3$ )  $\delta$  165.6, 160.1, 151.7, 136.3, 131.5, 129.9, 123.3, 122.9, 120.1, 118.7, 118.2, 113.9, 112.6, 65.3, 55.6, 14.9. LC-MS:  $t_R = 4.61$  min, purity: >99%,  $M/z$   $[\text{M}+\text{H}]^+$ : 306; HRMS calcd. For  $\text{C}_{16}\text{H}_{16}\text{ClNO}_3$   $[\text{M}+\text{H}]^+ = 306.0891$ , found 306.0881.

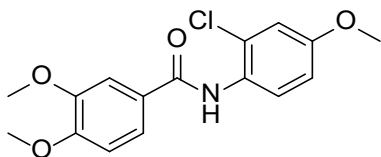

**N-(2-Chloro-4-methoxyphenyl)-3,4-dimethoxybenzamide (NPD-3297)**

$^1\text{H}$  NMR (300 MHz,  $\text{CDCl}_3$ )  $\delta$  8.59 (s, 1H), 8.29 (s, 1H), 7.45 (s, 1H), 7.42 - 7.34 (m, 2H), 7.15 - 7.02 (m, 1H), 6.56 (s, 1H), 3.94 (s, 3H), 3.91 (s, 3H), 3.88 (s, 3H).  $^{13}\text{C}$  NMR (151 MHz,  $\text{CDCl}_3$ )  $\delta$  164.9, 160.1, 151.6, 148.0, 136.6, 129.9, 121.8, 121.7, 118.8, 118.0, 114.1, 112.7, 96.7, 56.9, 56.4, 55.6. LC-MS:  $t_R = 4.53$  min, purity: >99%,  $M/z$   $[\text{M}+\text{H}]^+$ : 322; HRMS calcd. For  $\text{C}_{16}\text{H}_{16}\text{ClNO}_4$   $[\text{M}+\text{H}]^+ = 322.0841$ , found 322.0835.

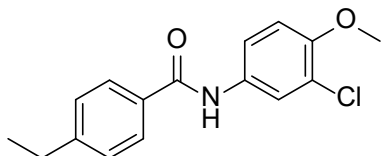

**N-(3-Chloro-4-methoxyphenyl)-4-ethylbenzamide (NPD-3298)**

$^1\text{H}$  NMR (300 MHz,  $\text{CDCl}_3$ )  $\delta$  7.77 (d,  $J = 8.1$  Hz, 2H), 7.69 (d,  $J = 2.4$  Hz, 2H), 7.52 (dd,  $J = 8.9, 2.5$  Hz, 1H), 7.31 (d,  $J = 8.1$  Hz, 2H), 6.92 (d,  $J = 8.9$  Hz, 1H), 3.90 (s, 3H), 2.72 (q,  $J = 7.6$  Hz, 2H), 1.27 (t,  $J = 7.6$  Hz, 3H).  $^{13}\text{C}$  NMR (151 MHz,  $\text{CDCl}_3$ )  $\delta$  165.7, 152.2, 148.9, 132.1, 131.7, 128.4, 127.2, 122.9, 122.7, 120.1, 112.4, 56.6, 29.0, 15.4. LC-MS:  $t_R = 4.74$  min, purity: >99%,  $M/z$   $[\text{M}+\text{H}]^+$ : 290; HRMS calcd. For  $\text{C}_{16}\text{H}_{16}\text{ClNO}_2$   $[\text{M}+\text{H}]^+ = 290.0942$ , found 290.0933.

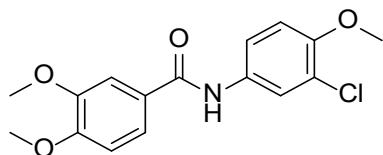

**N-(3-Chloro-4-methoxyphenyl)-3,4-dimethoxybenzamide (NPD-3299)**

$^1\text{H}$  NMR (600 MHz,  $\text{CDCl}_3$ )  $\delta$  7.70 (s, 1H), 7.67 (d,  $J$  = 2.5 Hz, 1H), 7.52 (dd,  $J$  = 8.8, 2.5 Hz, 1H), 7.48 (d,  $J$  = 1.8 Hz, 1H), 7.37 (dd,  $J$  = 8.3, 1.8 Hz, 1H), 6.94 - 6.89 (m, 2H), 3.95 (s, 6H), 3.90 (s, 3H).  $^{13}\text{C}$  NMR (151 MHz,  $\text{CDCl}_3$ )  $\delta$  165.3, 152.3, 152.1, 149.4, 131.7, 127.3, 123.0, 122.7, 120.1, 119.5, 112.4, 110.8, 110.5, 56.6, 56.2. Note: Two methoxy group carbon signals overlap. LC-MS:  $t_R$  = 4.07 min, purity: >99%,  $M/z$   $[\text{M}+\text{H}]^+$ : 322; HRMS calcd. For  $\text{C}_{16}\text{H}_{16}\text{ClNO}_4$   $[\text{M}+\text{H}]^+$  = 322.0841, found 322.0841.

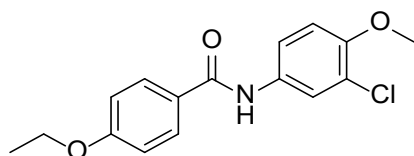

**N-(3-Chloro-4-methoxyphenyl)-4-ethoxybenzamide (NPD-3300)**

$^1\text{H}$  NMR (300 MHz,  $\text{CDCl}_3$ )  $\delta$  7.81 (d,  $J$  = 8.8 Hz, 2H), 7.70 - 7.63 (m, 2H), 7.50 (dd,  $J$  = 8.9, 2.5 Hz, 1H), 6.98 - 6.89 (m, 3H), 4.10 (q,  $J$  = 7.0 Hz, 2H), 3.90 (s, 3H), 1.45 (t,  $J$  = 7.0 Hz, 3H).  $^{13}\text{C}$  NMR (151 MHz,  $\text{CDCl}_3$ )  $\delta$  165.3, 162.1, 152.1, 131.8, 129.0, 126.7, 122.9, 122.7, 120.1, 114.6, 112.4, 63.9, 56.6, 14.8. LC-MS:  $t_R$  = 4.52 min, purity: >99%,  $M/z$   $[\text{M}+\text{H}]^+$ : 306; HRMS calcd. For  $\text{C}_{16}\text{H}_{16}\text{ClNO}_3$   $[\text{M}+\text{H}]^+$  = 306.0891, found 306.0884.

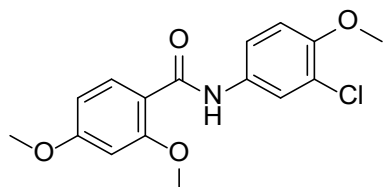

**N-(3-Chloro-4-methoxyphenyl)-2,4-dimethoxybenzamide (NPD-3301)**

$^1\text{H}$  NMR (300 MHz,  $\text{CDCl}_3$ )  $\delta$  9.59 (s, 1H), 8.24 (d,  $J$  = 8.8 Hz, 1H), 7.67 (d,  $J$  = 2.5 Hz, 1H), 7.60 (d,  $J$  = 2.4 Hz, 1H), 6.91 (d,  $J$  = 2.4 Hz, 1H), 6.65 (dd,  $J$  = 8.8, 2.3 Hz, 1H), 6.53 (d,  $J$  = 2.1 Hz, 1H), 4.03 (s, 3H), 3.90 (s, 3H), 3.88 (s, 3H).  $^{13}\text{C}$  NMR (151 MHz,  $\text{CDCl}_3$ )  $\delta$  164.0, 163.2, 158.7, 151.7, 134.4, 132.4, 122.9, 122.5, 120.1, 114.6, 112.4, 105.9, 98.9, 56.6, 56.4, 55.8. LC-MS:  $t_R$  = 4.59 min, purity: >99%,  $M/z$   $[\text{M}+\text{H}]^+$ : 322; HRMS calcd. For  $\text{C}_{16}\text{H}_{16}\text{ClNO}_4$   $[\text{M}+\text{H}]^+$  = 322.0841, found 322.0838.

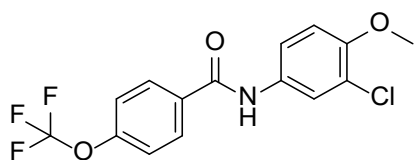

***N*-(3-Chloro-4-methoxyphenyl)-4-(trifluoromethoxy)benzamide (NPD-3302)**

$^1\text{H}$  NMR (300 MHz,  $\text{CDCl}_3$ )  $\delta$  7.89 (d,  $J$  = 8.7 Hz, 2H), 7.74 (s, 1H), 7.67 (d,  $J$  = 2.4 Hz, 1H), 7.49 (dd,  $J$  = 8.8, 2.4 Hz, 1H), 7.31 (d,  $J$  = 8.4 Hz, 2H), 6.92 (d,  $J$  = 8.9 Hz, 1H), 3.90 (s, 3H).  $^{13}\text{C}$  NMR (151 MHz,  $\text{CDCl}_3$ )  $\delta$  164.3, 152.4, 151.8, 133.1, 131.1, 128.9, 123.0, 122.7, 120.9, 120.1, 119.5 (q,  $J$  = 260.4 Hz), 112.3, 56.4. LC-MS:  $t_R$  = 4.86 min, purity: >99%,  $M/z$   $[\text{M}+\text{H}]^+$ : 346; HRMS calcd. For  $\text{C}_{15}\text{H}_{11}\text{ClF}_3\text{NO}_3$   $[\text{M}+\text{H}]^+$  = 346.0452, found 346.0456.

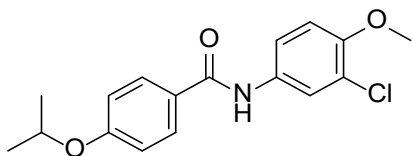

***N*-(3-Chloro-4-methoxyphenyl)-4-isopropoxybenzamide (NPD-3303)**

$^1\text{H}$  NMR (300 MHz,  $\text{CDCl}_3$ )  $\delta$  7.80 (d,  $J$  = 8.8 Hz, 2H), 7.68 (d,  $J$  = 2.5 Hz, 1H), 7.63 (s, 1H), 7.50 (dd,  $J$  = 8.8, 2.5 Hz, 1H), 6.98 - 6.89 (m, 3H), 4.64 (hept,  $J$  = 6.1 Hz, 1H), 3.90 (s, 3H), 1.37 (d,  $J$  = 6.1 Hz, 6H).  $^{13}\text{C}$  NMR (151 MHz,  $\text{CDCl}_3$ )  $\delta$  165.3, 161.2, 152.1, 131.8, 129.0, 126.4, 122.9, 122.7, 120.1, 115.6, 112.4, 70.3, 56.6, 22.1. LC-MS:  $t_R$  = 4.72 min, purity: >99%,  $M/z$   $[\text{M}+\text{H}]^+$ : 320; HRMS calcd. For  $\text{C}_{17}\text{H}_{18}\text{ClNO}_3$   $[\text{M}+\text{H}]^+$  = 320.1048, found 320.1036.

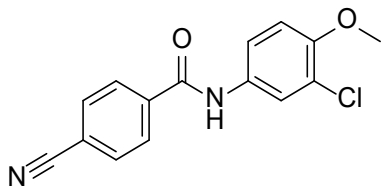

***N*-(3-Chloro-4-methoxyphenyl)-4-cyanobenzamide (NPD-3304)**

$^1\text{H}$  NMR (300 MHz,  $\text{CDCl}_3$ )  $\delta$  7.96 (d,  $J$  = 8.3 Hz, 2H), 7.79 (d,  $J$  = 8.4 Hz, 2H), 7.75 (s, 1H), 7.68 (d,  $J$  = 2.3 Hz, 1H), 7.50 (dd,  $J$  = 8.8, 2.2 Hz, 1H), 6.94 (d,  $J$  = 8.9 Hz, 1H), 3.91 (s, 3H).  $^{13}\text{C}$  NMR (126 MHz,  $\text{DMSO}-d_6$ )  $\delta$  163.9, 151.1, 138.7, 132.5, 132.4, 128.5, 122.0, 120.5, 120.3, 118.4, 113.9, 112.8, 56.2. LC-MS:  $t_R$  = 4.20 min, purity: >99%,  $M/z$   $[\text{M}+\text{H}]^+$ : 287; HRMS calcd. For  $\text{C}_{15}\text{H}_{11}\text{ClN}_2\text{O}_2$   $[\text{M}+\text{H}]^+$  = 287.0582, found 287.0570.

**Table S1. Overview of the PDE4NPD toolbox and inhibitor selectivity for human (h) or parasite PDEs**

| <b>Tool</b>     | <b>Compound ID</b> | <b>Name</b>  | <b>PDE selectivity</b> | <b>Literature</b> |
|-----------------|--------------------|--------------|------------------------|-------------------|
| <b>NPD-0013</b> | VUF14752           | IBMX         | non-selective          | [7]               |
| <b>NPD-0014</b> | VUF14753           | Caffeine     | non-selective          | [8]               |
| <b>NPD-0015</b> | VUF14754           | Dipyradamole | non-selective          | [9]               |
| <b>NPD-0009</b> | VUF14748           | Vinpocetine  | hPDE1                  | [10]              |
| <b>NPD-0031</b> | VUF14680           |              | hPDE1                  | [11]              |
| <b>NPD-0017</b> | VUF14759           | BAY 60-7550  | hPDE2                  | [12]              |
| <b>NPD-0010</b> | VUF14749           | Trequinsin   | hPDE3                  | [13]              |
| <b>NPD-0011</b> | VUF14750           | Amrinone     | hPDE3                  | [14]              |
| <b>NPD-0018</b> | VUF14760           | Milrinone    | hPDE3                  | [12]              |
| <b>NPD-0027</b> | VUF14810           | Cilostamide  | hPDE3                  | [15]              |
| <b>NPD-0005</b> | VUF14664           | piclamilast  | hPDE4                  | [16]              |
| <b>NPD-0006</b> | VUF14665           | roflumilast  | hPDE4                  | [12]              |
| <b>NPD-0007</b> | VUF14672           |              | hPDE4                  | [17]              |
| <b>NPD-0034</b> | VUF14910           | etazolate    | hPDE4                  | [18]              |
| <b>NPD-0072</b> | VUF14761           | Rolipram     | hPDE4                  | [12]              |
| <b>NPD-0029</b> | VUF14834           |              | hPDE4/7                | [19]              |
| <b>NPD-0001</b> | VUF14656           | PPS54019     | hPDE4/TbrPDEB1         | [20]              |
| <b>NPD-0340</b> | VUF13524           |              | hPDE4/TbrPDEB1         | [21]              |
| <b>NPD-0339</b> | VUF11842           |              | hPDE4/TbrPDEB1         | [12]              |
| <b>NPD-0002</b> | VUF14661           |              | hPDE5                  | [22]              |
| <b>NPD-0003</b> | VUF14662           | Sildenafil   | hPDE5                  | [12]              |
| <b>NPD-0004</b> | VUF14789           |              | hPDE5                  | [23]              |
| <b>NPD-0022</b> | VUF14786           | Tadalafil    | hPDE5                  | [12]              |
| <b>NPD-0030</b> | VUF14837           | Vardenafil   | hPDE5                  | [12]              |
| <b>NPD-0025</b> | VUF14808           | Zaprinast    | hPDE5/PDE6             | [24]              |
| <b>NPD-0020</b> | VUF14782           | BRL-50481    | hPDE7                  | [25]              |
| <b>NPD-0078</b> | MR 1.51            |              | hPDE7                  | [26]              |
| <b>NPD-0082</b> | AGF2.20            |              | hPDE7                  | [27]              |
| <b>NPD-1091</b> | WP5.11b            |              | hPDE8                  | [28]              |
| <b>NPD-1092</b> | WP5.19R            |              | hPDE8                  | [28]              |
| <b>NPD-1100</b> | VSP2.34            |              | hPDE8                  | [28]              |
| <b>NPD-0012</b> | VUF14751           | BAY73-6691   | hPDE9                  | [12]              |
| <b>NPD-0019</b> | VUF14763           | BIPPO        | PfPDEalpha             | [29]              |
| <b>NPD-0024</b> | VUF14792           |              | PfPDEalpha             | [29]              |
| <b>NPD-0008</b> | VUF14680           | PPS58083     | TbrPDEB1               | [30]              |
| <b>NPD-0016</b> | VUF14755           | Papaverine   | hPDE10                 | [12]              |
| <b>NPD-0026</b> | VUF14809           | TC-E 5005    | hPDE10                 | [31]              |



Table S2. SmPDE4A inhibition of roflumilast analogues

| Comp     | SmPDE4A pK <sub>i</sub> <sup>a</sup><br>or inhibition at<br>10 µM | Comp     | SmPDE4A pK <sub>i</sub> <sup>a</sup><br>or inhibition at<br>10 µM | Comp     | SmPDE4A pK <sub>i</sub> <sup>a</sup><br>or inhibition at<br>10 µM |
|----------|-------------------------------------------------------------------|----------|-------------------------------------------------------------------|----------|-------------------------------------------------------------------|
| NPD-1177 | 44%                                                               | NPD-1201 | 1%                                                                | NPD-3083 | 3%                                                                |
| NPD-1178 | 48%                                                               | NPD-1202 | 0%                                                                | NPD-3085 | 1%                                                                |
| NPD-1179 | 50%                                                               | NPD-1203 | 10%                                                               | NPD-3086 | 41%                                                               |
| NPD-1181 | 22%                                                               | NPD-1206 | 14%                                                               | NPD-3093 | 5.6 ± 0.0 <sup>a</sup>                                            |
| NPD-1182 | 22%                                                               | NPD-1472 | 5%                                                                | NPD-3286 | 7%                                                                |
| NPD-1183 | 15%                                                               | NPD-2976 | 46%                                                               | NPD-3287 | 20%                                                               |
| NPD-1184 | 22%                                                               | NPD-2981 | 6.4 ± 0.1                                                         | NPD-3288 | 0%                                                                |
| NPD-1185 | 18%                                                               | NPD-2991 | 5.2 ± 0.2 <sup>a</sup>                                            | NPD-3289 | 0%                                                                |
| NPD-1186 | 19%                                                               | NPD-2992 | 4%                                                                | NPD-3290 | 0%                                                                |
| NPD-1187 | 20%                                                               | NPD-2993 | 24%                                                               | NPD-3291 | 0%                                                                |
| NPD-1188 | 13%                                                               | NPD-2994 | 7%                                                                | NPD-3292 | 0%                                                                |
| NPD-1189 | 8%                                                                | NPD-2995 | 3%                                                                | NPD-3293 | 2%                                                                |
| NPD-1190 | 9%                                                                | NPD-2996 | 21%                                                               | NPD-3294 | 0%                                                                |
| NPD-1191 | 8%                                                                | NPD-2997 | 27%                                                               | NPD-3295 | 8%                                                                |
| NPD-1192 | 6%                                                                | NPD-2998 | 11%                                                               | NPD-3296 | 6%                                                                |
| NPD-1193 | 7%                                                                | NPD-2999 | 26%                                                               | NPD-3297 | 0%                                                                |
| NPD-1194 | 0%                                                                | NPD-3001 | 15%                                                               | NPD-3298 | 6.1 ± 0.0 <sup>a</sup>                                            |
| NPD-1195 | 0%                                                                | NPD-3002 | 21%                                                               | NPD-3299 | 0%                                                                |
| NPD-1196 | 1%                                                                | NPD-3003 | 4%                                                                | NPD-3300 | 5.8 ± 0.0 <sup>a</sup>                                            |
| NPD-1197 | 10%                                                               | NPD-3004 | 5.0 ± 0.0 <sup>a</sup>                                            | NPD-3301 | 16%                                                               |
| NPD-1198 | 6%                                                                | NPD-3005 | 18%                                                               | NPD-3302 | 42%                                                               |
| NPD-1199 | 28%                                                               | NPD-3006 | 16%                                                               | NPD-3303 | 27%                                                               |
| NPD-1200 | 0%                                                                | NPD-3007 | 34%                                                               | NPD-3304 | 18%                                                               |

<sup>a</sup> Partial curve

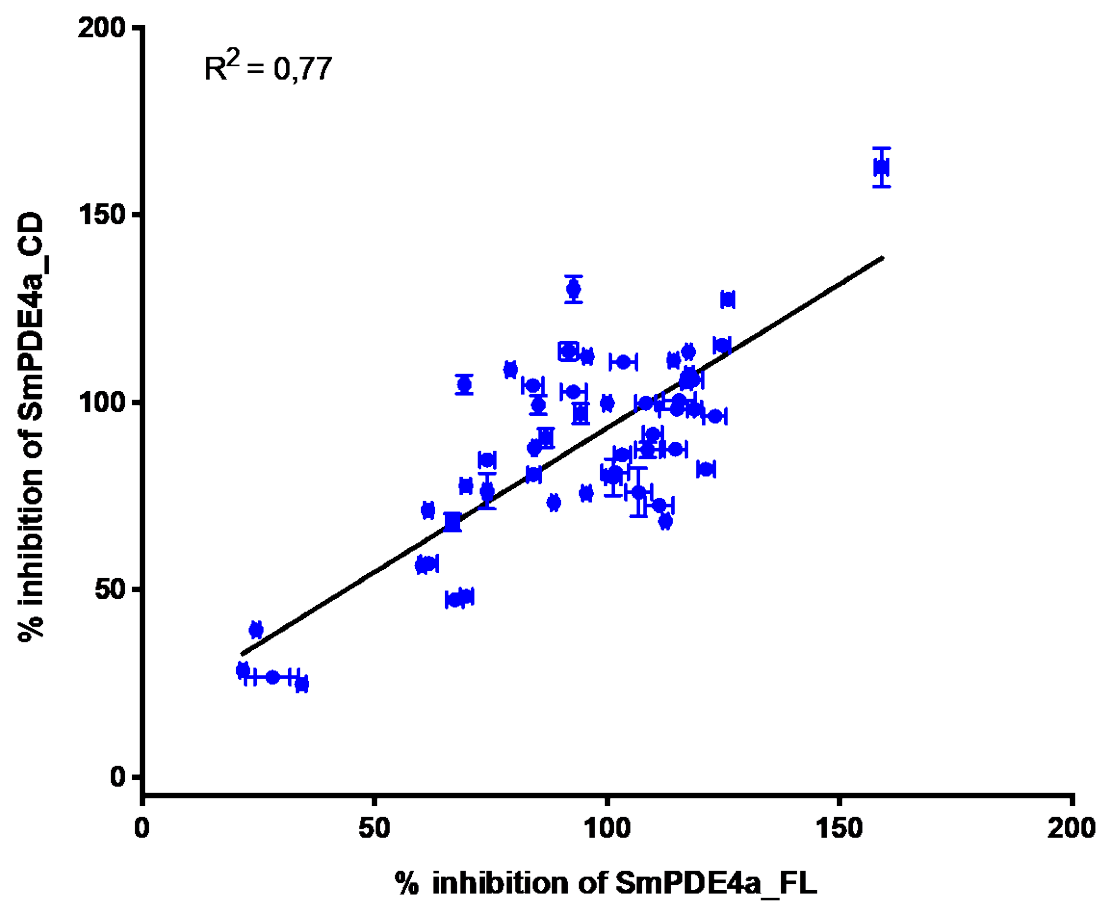

Fig S1. Correlation plot of the inhibition of the PDE Toolbox compounds of the enzymatic activities of purified SmPDE4A\_CD (catalytic domain) and SmPDE4A\_FL (full length).

**A**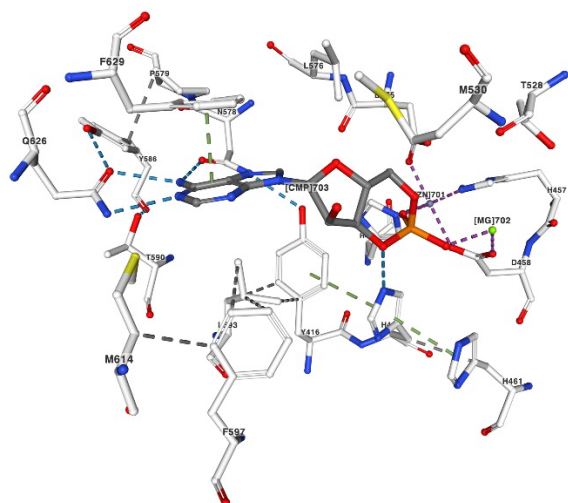**B**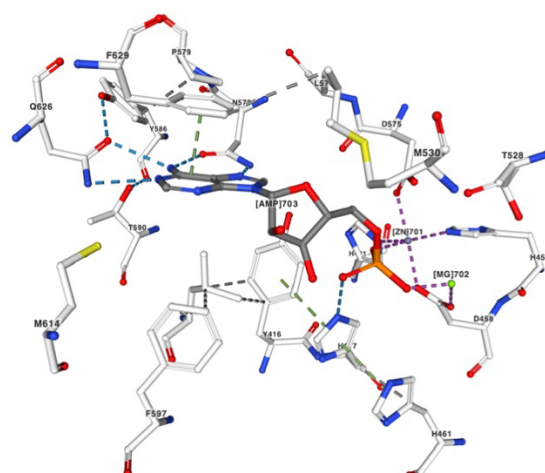

**Fig S2. Binding of the substrate cAMP (A) and its hydrolyzed product AMP (B) in the binding pockets of SmPDE4A\_CD, as observed in the chain A and chain B of the X-ray structure 6FG5. Binding pocket residues are visualized with NGL Viewer [33] implemented at the RCSB PDB website.**



## Crystallographic data

The coordinates of the 2 obtained x-ray structures of SmPDE4A\_CD can be obtained from the Protein Data Bank with the IDs 6FG5 (apo structure) and 6EZU (co-crystal with cAMP and AMP). Full validation reports for both structures can be found at [https://files.rcsb.org/pub/pdb/validation\\_reports/fg/6fg5/6fg5\\_full\\_validation.pdf](https://files.rcsb.org/pub/pdb/validation_reports/fg/6fg5/6fg5_full_validation.pdf) for 6FG5 and at [https://files.rcsb.org/pub/pdb/validation\\_reports/ez/6ezu/6ezu\\_full\\_validation.pdf](https://files.rcsb.org/pub/pdb/validation_reports/ez/6ezu/6ezu_full_validation.pdf) for 6EZU. For both structures the data and refinement statistics are reported in the tables below.

### 6FG5:

| Property                                                                | Value                                                       | Source           |
|-------------------------------------------------------------------------|-------------------------------------------------------------|------------------|
| Space group                                                             | P 31 2 1                                                    | Depositor        |
| Cell constants<br>a, b, c, $\alpha$ , $\beta$ , $\gamma$                | 81.80Å 81.80Å 256.13Å<br>90.00° 90.00° 120.00°              | Depositor        |
| Resolution (Å)                                                          | 47.50 – 2.35<br>47.50 – 2.35                                | Depositor<br>EDS |
| % Data completeness<br>(in resolution range)                            | 100.0 (47.50-2.35)<br>96.1 (47.50-2.35)                     | Depositor<br>EDS |
| $R_{merge}$                                                             | 0.07                                                        | Depositor        |
| $R_{sym}$                                                               | (Not available)                                             | Depositor        |
| $\langle I/\sigma(I) \rangle$ <sup>1</sup>                              | 1.67 (at 2.34Å)                                             | Xtriage          |
| Refinement program                                                      | REFMAC 5.8.0189                                             | Depositor        |
| R, $R_{free}$                                                           | 0.203 , 0.245<br>0.205 , (Not available)                    | Depositor<br>DCC |
| $R_{free}$ test set                                                     | No test flags present.                                      | wwPDB-VP         |
| Wilson B-factor (Å <sup>2</sup> )                                       | 50.1                                                        | Xtriage          |
| Anisotropy                                                              | 0.236                                                       | Xtriage          |
| Bulk solvent $k_{sol}$ (e/Å <sup>3</sup> ), $B_{sol}$ (Å <sup>2</sup> ) | 0.31 , 26.2                                                 | EDS              |
| L-test for twinning <sup>2</sup>                                        | $\langle  L  \rangle = 0.49$ , $\langle L^2 \rangle = 0.33$ | Xtriage          |
| Estimated twinning fraction                                             | 0.026 for -h,-k,l                                           | Xtriage          |
| $F_o, F_c$ correlation                                                  | 0.95                                                        | EDS              |
| Total number of atoms                                                   | 5411                                                        | wwPDB-VP         |
| Average B, all atoms (Å <sup>2</sup> )                                  | 57.0                                                        | wwPDB-VP         |

6EZU:

| Property                                                                | Value                                                       | Source           |
|-------------------------------------------------------------------------|-------------------------------------------------------------|------------------|
| Space group                                                             | P 31 2 1                                                    | Depositor        |
| Cell constants<br>a, b, c, $\alpha$ , $\beta$ , $\gamma$                | 81.55Å 81.55Å 255.87Å<br>90.00° 90.00° 120.00°              | Depositor        |
| Resolution (Å)                                                          | 85.44 – 2.04<br>47.41 – 2.04                                | Depositor<br>EDS |
| % Data completeness<br>(in resolution range)                            | 99.9 (85.44-2.04)<br>100.0 (47.41-2.04)                     | Depositor<br>EDS |
| $R_{merge}$                                                             | 0.07                                                        | Depositor        |
| $R_{sym}$                                                               | (Not available)                                             | Depositor        |
| $\langle I/\sigma(I) \rangle$ <sup>1</sup>                              | 1.84 (at 2.05Å)                                             | Xtriage          |
| Refinement program                                                      | REFMAC 5.8.0189                                             | Depositor        |
| R, $R_{free}$                                                           | 0.199 , 0.233<br>0.205 , 0.236                              | Depositor<br>DCC |
| $R_{free}$ test set                                                     | 3042 reflections (4.76%)                                    | wwPDB-VP         |
| Wilson B-factor (Å <sup>2</sup> )                                       | 49.4                                                        | Xtriage          |
| Anisotropy                                                              | 0.254                                                       | Xtriage          |
| Bulk solvent $k_{sol}$ (e/Å <sup>3</sup> ), $B_{sol}$ (Å <sup>2</sup> ) | 0.32 , 44.8                                                 | EDS              |
| L-test for twinning <sup>2</sup>                                        | $\langle  L  \rangle = 0.50$ , $\langle L^2 \rangle = 0.34$ | Xtriage          |
| Estimated twinning fraction                                             | 0.022 for -h,-k,l                                           | Xtriage          |
| $F_o, F_c$ correlation                                                  | 0.96                                                        | EDS              |
| Total number of atoms                                                   | 5340                                                        | wwPDB-VP         |
| Average B, all atoms (Å <sup>2</sup> )                                  | 61.0                                                        | wwPDB-VP         |

Acquired by : Admin  
Date Acquired : 25/4/2019 9:19:48 AM  
Sample Name : NPD-0005  
Sample ID :  
Tray# : 1  
Vial# : 3  
Injection Volume : 2  
Data File : C:\LabSolutions\Data\2019\2019-wk17\NPD-0005.lcd  
Background File : blanco 25042019.lcd  
Method File : Method SCAN ACID standard.lcm  
Report Format : DefaultLCMS.lcr  
Tuning File : C:\LabSolutions\Tuning\Tuning-ESI-pos-neg01072015a.lct  
Processed by : Admin  
Modified Date : 25/4/2019 10:14:22 AM

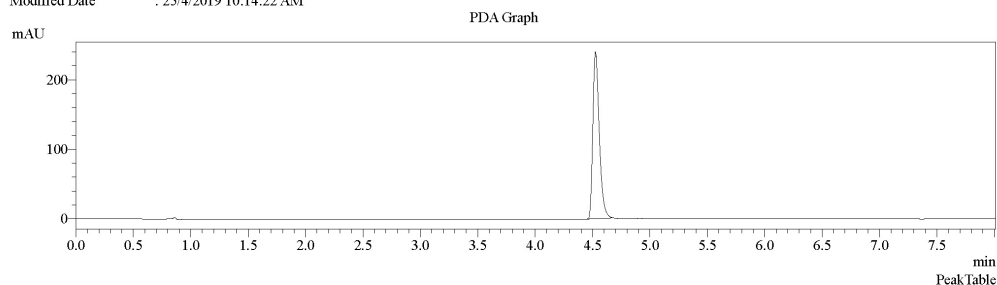

| Peak# | Name | Ret. Time | Area   | Area %  |
|-------|------|-----------|--------|---------|
| 1     |      | 4.521     | 924888 | 100.000 |

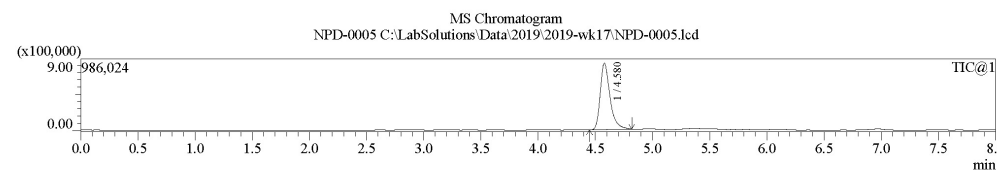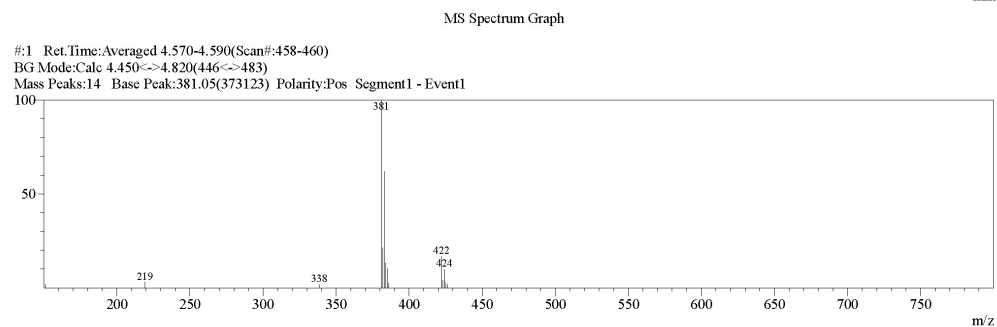

MS Spectrum Table

| #  | m/z    | Abs.Inten. | Rel.Inten. | Charge | Polarity | Monoisotopic |
|----|--------|------------|------------|--------|----------|--------------|
| 1  | 150.90 | 6333       | 1.70       |        |          |              |
| 2  | 219.10 | 10740      | 2.88       |        |          |              |
| 3  | 338.30 | 6050       | 1.62       |        |          |              |
| 4  | 381.05 | 373123     | 100.00     |        |          |              |
| 5  | 382.00 | 79416      | 21.28      |        |          |              |
| 6  | 383.05 | 231440     | 62.03      |        |          |              |
| 7  | 384.05 | 49370      | 13.23      |        |          |              |
| 8  | 385.05 | 38470      | 10.31      |        |          |              |
| 9  | 386.15 | 8921       | 2.39       |        |          |              |
| 10 | 422.10 | 61998      | 16.62      |        |          |              |
| 11 | 423.05 | 14621      | 3.92       |        |          |              |
| 12 | 424.10 | 36514      | 9.79       |        |          |              |
| 13 | 425.15 | 9774       | 2.62       |        |          |              |
| 14 | 426.05 | 6295       | 1.69       |        |          |              |

Figure S3 LCMS spectrum of compound NPD-0005

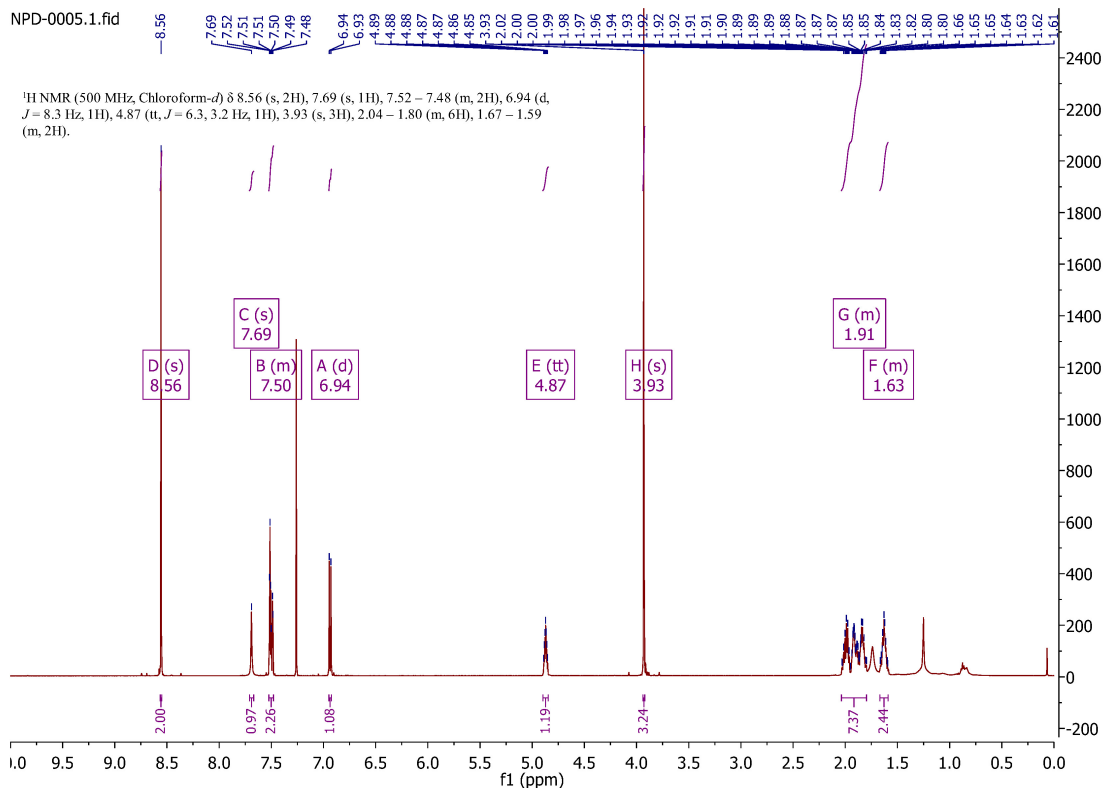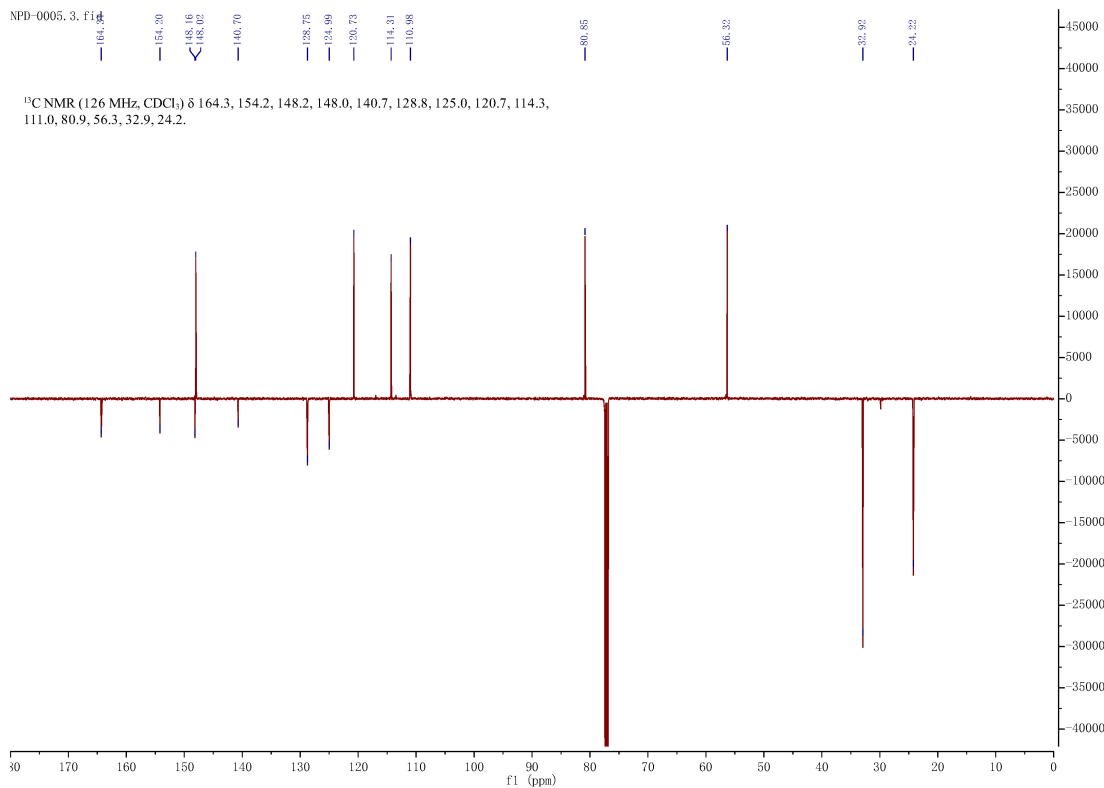

Acquired by : Admin  
 Date Acquired : 1/24/2017 1:30:09 PM  
 Sample Name : YAZH01-022  
 Sample ID :  
 Tray# : 1  
 Vial# : 17  
 Injection Volume : 1  
 Data File : C:\LabSolutions\Data\2017\2017-wk04\YAZH01-022.lcd  
 Background File : Blanco24012017.lcd  
 Method File : Method SCAN ACID standard.lcm  
 Report Format : DefaultL.CMS.lcr  
 Tuning File : C:\LabSolutions\Tuning\Tuning-ESI-pos-neg01072015a.lct  
 Processed by : Admin  
 Modified Date : 1/24/2017 2:07:19 PM

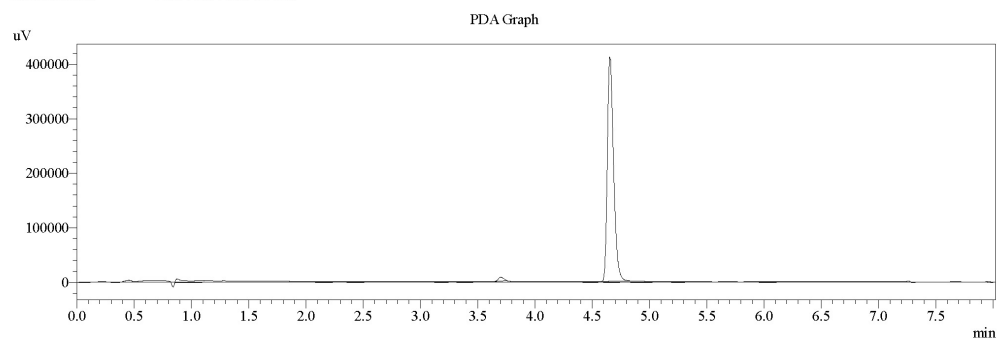

PDA Ch1 254nm 4nm

| Peak# | Name | Ret. Time | Area    | Area % |
|-------|------|-----------|---------|--------|
| 1     |      | 3.697     | 22427   | 1.427  |
| 2     |      | 4.650     | 1549438 | 98.573 |

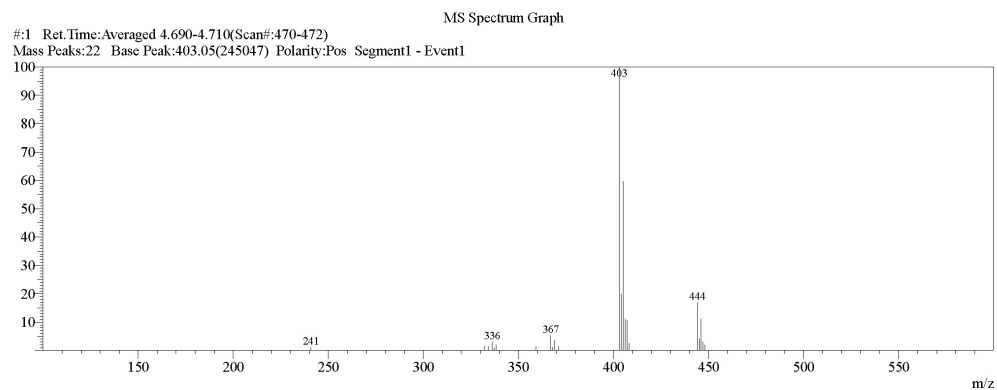

MS Spectrum Table

#1 Ret.Time:  
 BG Mode:Calc 4.580<->4.910(459<->492)  
 Mass Peaks:22 Base Peak:403.05(245047) Polarity:Pos Segment1 - Event1

| #  | m/z    | Abs.Inten. | Rel.Inten. | Charge | Polarity | Monoisotopic | #  | m/z    | Abs.Inten. | Rel.Inten. | Charge | Polarity | Monoisotopic |
|----|--------|------------|------------|--------|----------|--------------|----|--------|------------|------------|--------|----------|--------------|
| 1  | 240.90 | 2748       | 1.12       |        |          |              | 12 | 403.05 | 245047     | 100.00     |        |          |              |
| 2  | 332.25 | 4102       | 1.67       |        |          |              | 13 | 404.10 | 48852      | 19.94      |        |          |              |
| 3  | 334.15 | 3658       | 1.49       |        |          |              | 14 | 405.05 | 146051     | 59.60      |        |          |              |
| 4  | 336.15 | 7441       | 3.04       |        |          |              | 15 | 406.00 | 27547      | 11.24      |        |          |              |
| 5  | 337.15 | 2468       | 1.01       |        |          |              | 16 | 407.05 | 26258      | 10.72      |        |          |              |
| 6  | 338.20 | 4864       | 1.98       |        |          |              | 17 | 408.10 | 6298       | 2.57       |        |          |              |
| 7  | 359.35 | 3002       | 1.23       |        |          |              | 18 | 444.10 | 41602      | 16.98      |        |          |              |
| 8  | 367.05 | 12833      | 5.24       |        |          |              | 19 | 445.25 | 10121      | 4.13       |        |          |              |
| 9  | 368.15 | 2868       | 1.17       |        |          |              | 20 | 446.15 | 27620      | 11.27      |        |          |              |
| 10 | 369.10 | 8749       | 3.57       |        |          |              | 21 | 447.15 | 7595       | 3.10       |        |          |              |
| 11 | 371.15 | 3473       | 1.42       |        |          |              | 22 | 448.10 | 4990       | 2.04       |        |          |              |

Figure S6 LCMS spectrum of compound NPD-0006

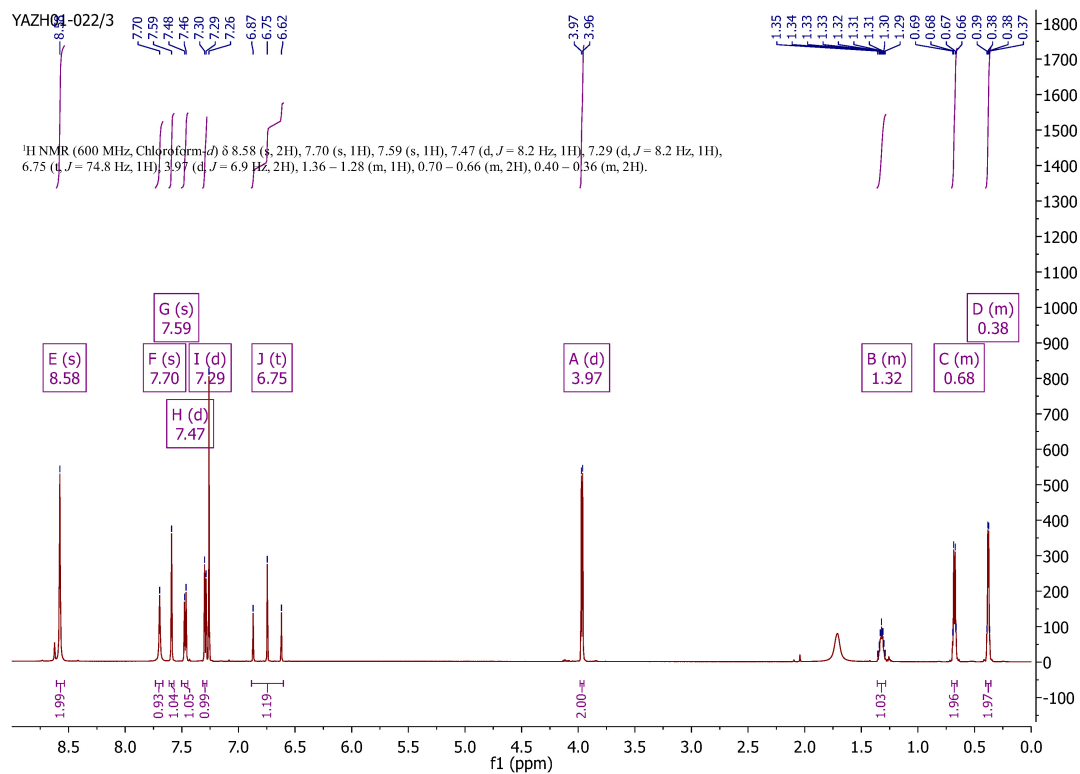

Figure S7  $^1\text{H}$  NMR spectrum of compound NPD-0006

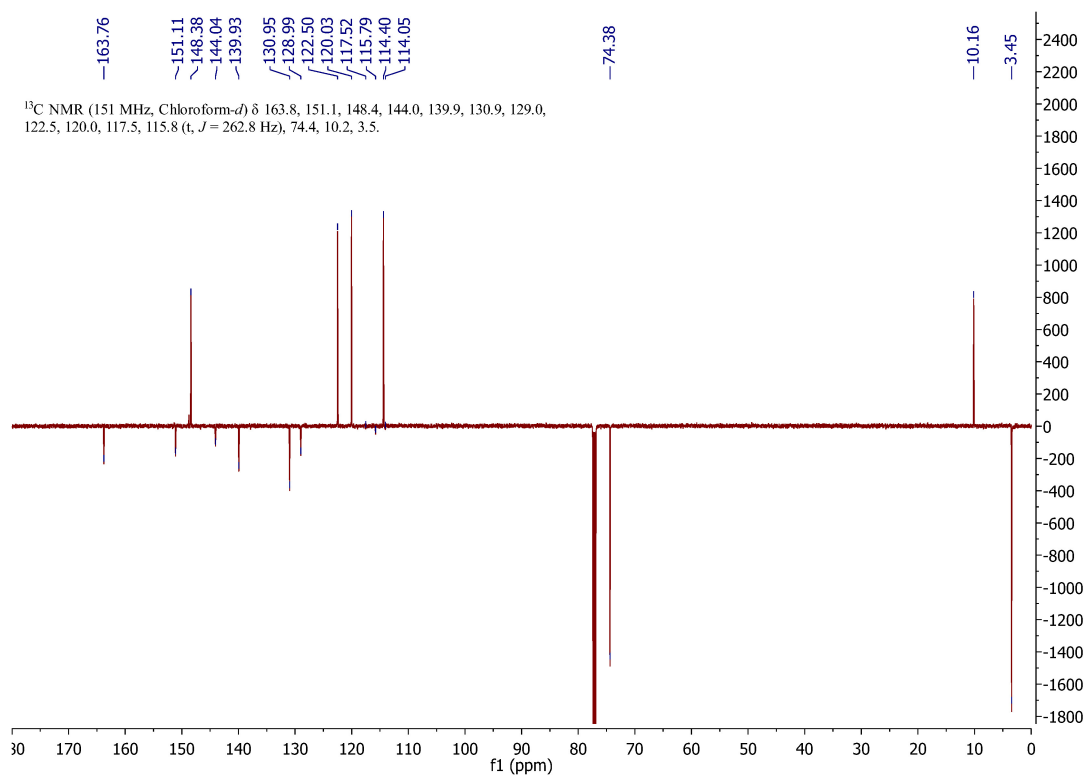

Figure S8  $^{13}\text{C}$  NMR spectrum of compound NPD-0006

Acquired by : Admin  
 Date Acquired : 6/5/2019 10:03:02 AM  
 Sample Name : VUF14667  
 Sample ID :  
 Tray# : 1  
 Vial# : 3  
 Injection Volume : 3  
 Data File : C:\LabSolutions\Data\2019\2019-wk19\VUF14667.lcd  
 Background File : blanco 06052019.lcd  
 Method File : Method SCAN ACID standard.lcm  
 Report Format : Default.LCMS.lcr  
 Tuning File : C:\LabSolutions\Tuning\Tuning-ESI-pos-neg01072015a.lct  
 Processed by : Admin  
 Modified Date : 6/5/2019 10:28:29 AM

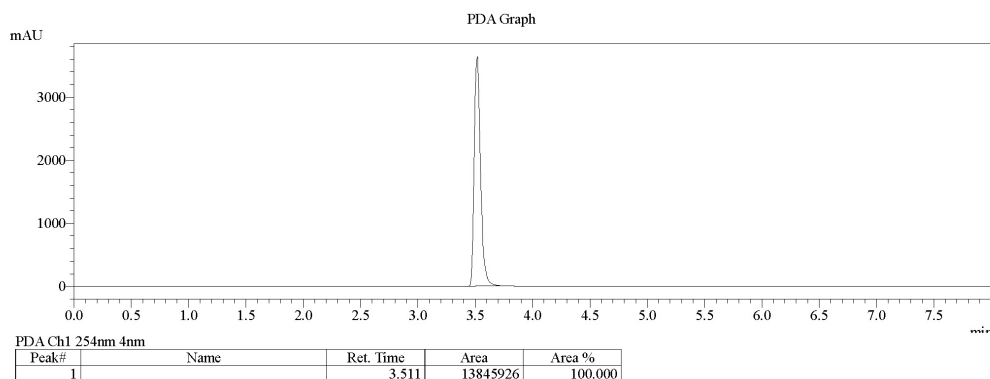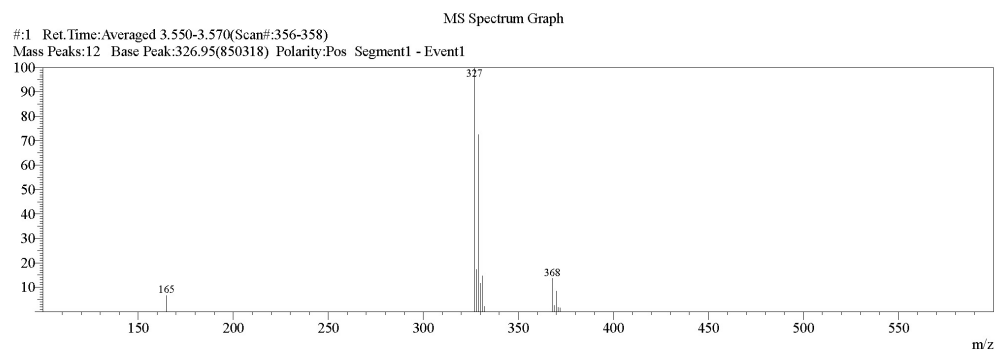

MS Spectrum Table

#1 Ret.Time:  
 BG Mode:Calc 3.450<->3.950(346<->396)

Mass Peaks:12 Base Peak:326.95(850318) Polarity:Pos Segment1 - Event1

| # | m/z    | Abs.Inten. | Rel.Inten. | Charge | Polarity | Monoisotopic | #  | m/z    | Abs.Inten. | Rel.Inten. | Charge | Polarity | Monoisotopic |
|---|--------|------------|------------|--------|----------|--------------|----|--------|------------|------------|--------|----------|--------------|
| 1 | 165.00 | 56320      | 6.62       |        |          |              | 7  | 332.00 | 18582      | 2.19       |        |          |              |
| 2 | 326.95 | 850318     | 100.00     |        |          |              | 8  | 368.00 | 115503     | 13.58      |        |          |              |
| 3 | 328.00 | 147851     | 17.39      |        |          |              | 9  | 369.05 | 22429      | 2.64       |        |          |              |
| 4 | 329.00 | 617151     | 72.58      |        |          |              | 10 | 370.05 | 71128      | 8.36       |        |          |              |
| 5 | 329.95 | 99378      | 11.69      |        |          |              | 11 | 371.05 | 16009      | 1.88       |        |          |              |
| 6 | 331.00 | 124143     | 14.60      |        |          |              | 12 | 372.05 | 12762      | 1.50       |        |          |              |

**Figure S9 LCMS spectrum of compound NPD-0446**

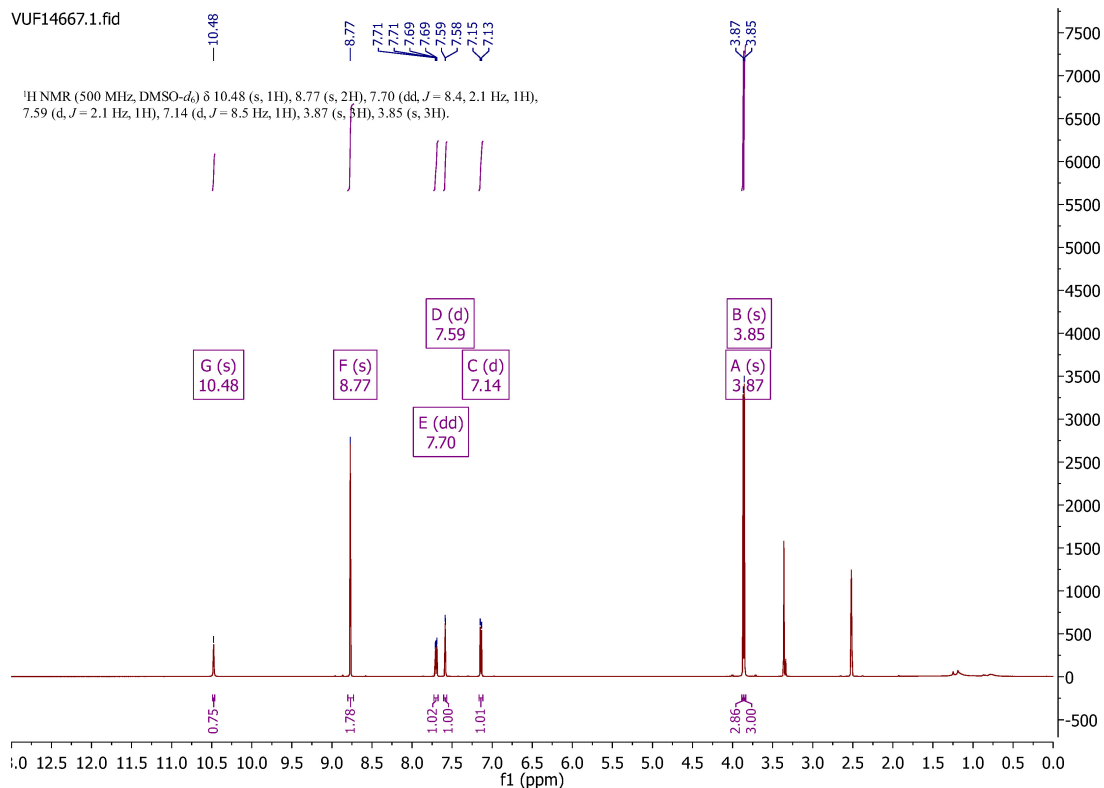

Figure S10  $^1\text{H}$  NMR spectrum of compound NPD-0446

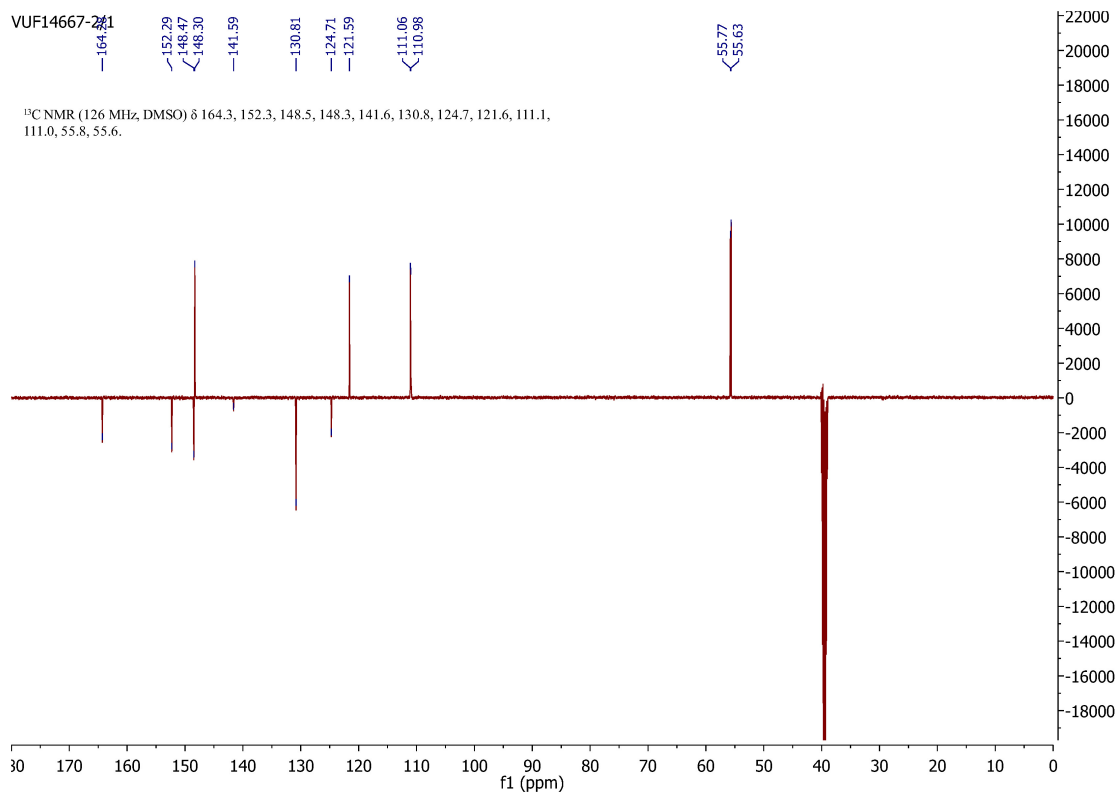

Figure S11  $^{13}\text{C}$  NMR spectrum of compound NPD-0446



Acquired by : Admin  
 Date Acquired : 1/26/2016 5:05:32 PM  
 Sample Name : Fatih compound 62  
 Sample ID :  
 Tray# : 1  
 Vial# : 5  
 Injection Volume : 1  
 Data File : C:\LabSolutions\Methods\FAR Pract Fatih compound 62.lcd  
 Background File : Blanco-2 26012016.lcd  
 Method File : Method SCAN ACID standard.lcm  
 Report Format : DefaultL.CMS.lcr  
 Tuning File : C:\LabSolutions\Tuning File\Tuning-ESI-pos-neg01072015.lct  
 Processed by : Admin  
 Modified Date : 1/27/2016 9:06:35 AM

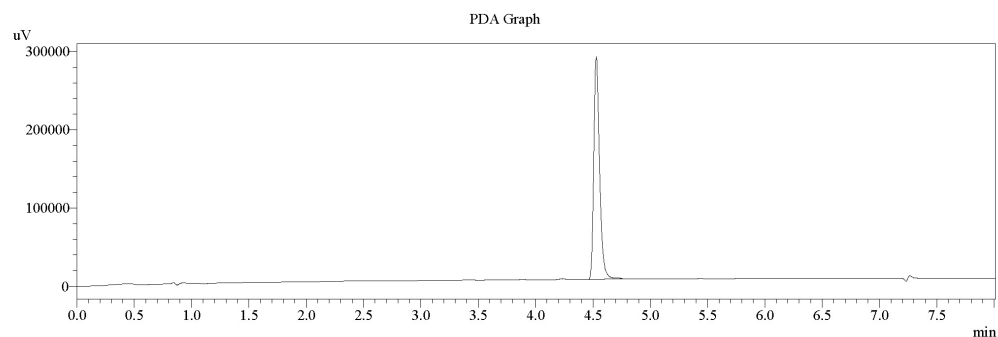

PDA Ch1 254nm 4nm

| Peak# | Name | Ret. Time | Area   | Area %  |
|-------|------|-----------|--------|---------|
| 1     |      | 4.524     | 989667 | 100.000 |

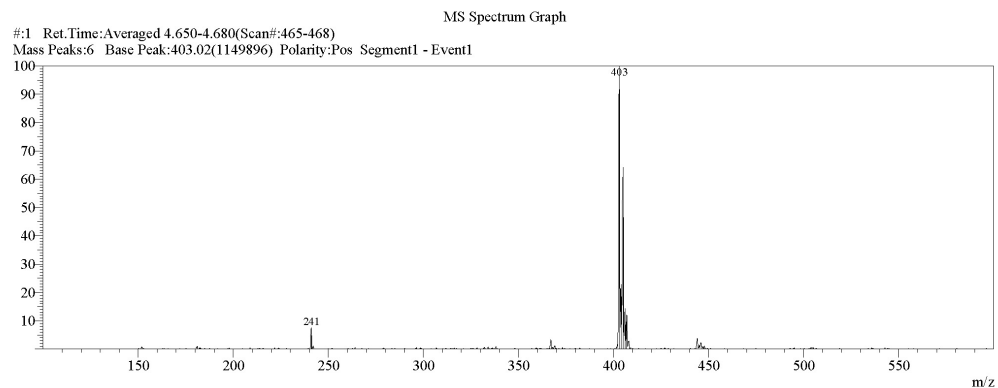

MS Spectrum Table

#1 Ret.Time:  
 BG Mode:None  
 Mass Peaks:6 Base Peak:403.02(1067212) Polarity:Pos Segment1 - Event

| # | m/z    | Abs.Inten. | Rel.Inten. | Charge | Polarity | Monoisotopic | # | m/z    | Abs.Inten. | Rel.Inten. | Charge | Polarity | Monoisotopic |
|---|--------|------------|------------|--------|----------|--------------|---|--------|------------|------------|--------|----------|--------------|
| 1 | 241.07 | 73936      | 6.93       |        |          |              | 4 | 405.01 | 707412     | 66.29      |        |          |              |
| 2 | 403.02 | 1067212    | 100.00     |        |          |              | 5 | 406.08 | 142461     | 13.35      |        |          |              |
| 3 | 404.08 | 229993     | 21.55      |        |          |              | 6 | 407.01 | 121379     | 11.37      |        |          |              |

Figure S12 LCMS spectrum of compound NPD-0546

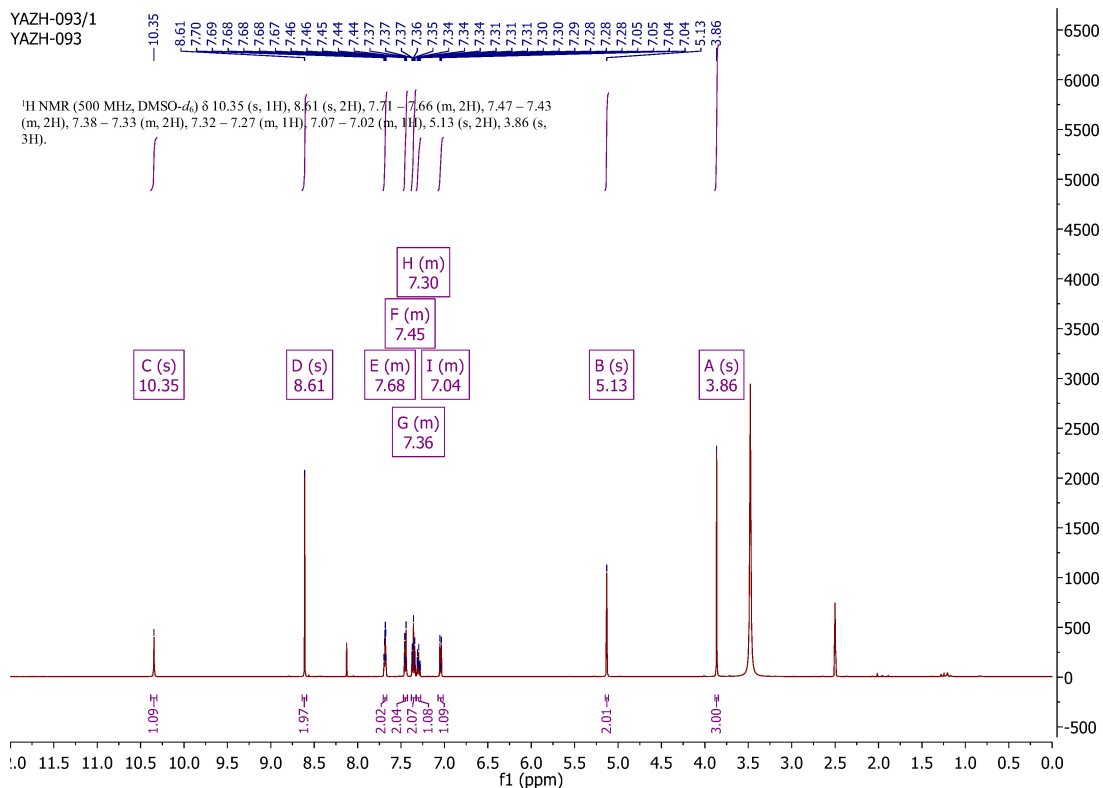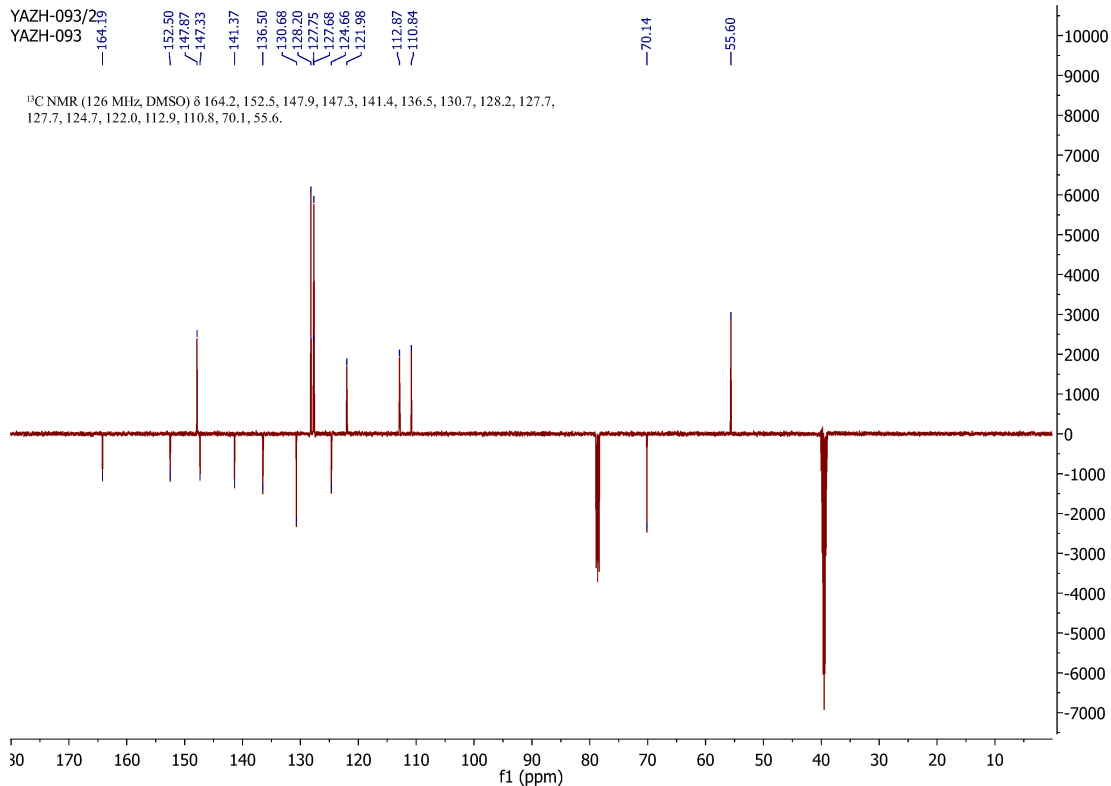

Acquired by : Admin  
 Date Acquired : 6/5/2019 9:54:24 AM  
 Sample Name : VUF14666  
 Sample ID :  
 Tray# : 1  
 Vial# : 2  
 Injection Volume : 3  
 Data File : C:\LabSolutions\Data\2019\2019-wk19\VUF14666.lcd  
 Background File : blanco 06052019.lcd  
 Method File : Method SCAN ACID standard.lcm  
 Report Format : DefaultL.CMS.lcr  
 Tuning File : C:\LabSolutions\Tuning\Tuning-ESI-pos-neg01072015a.lct  
 Processed by : Admin  
 Modified Date : 6/5/2019 10:25:29 AM

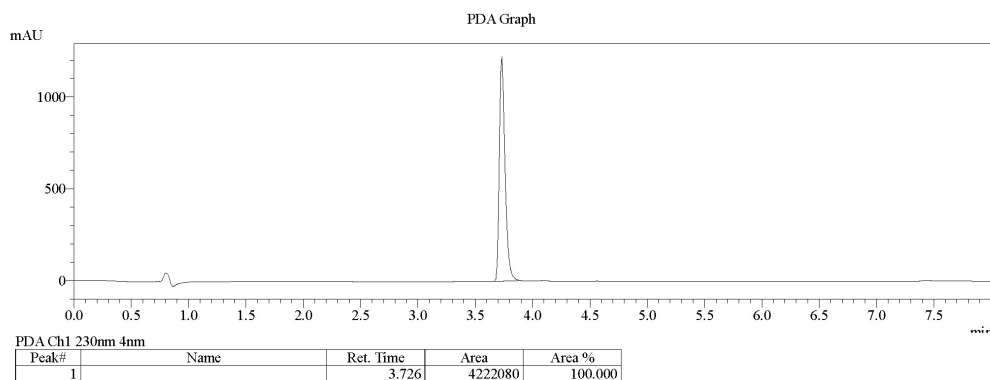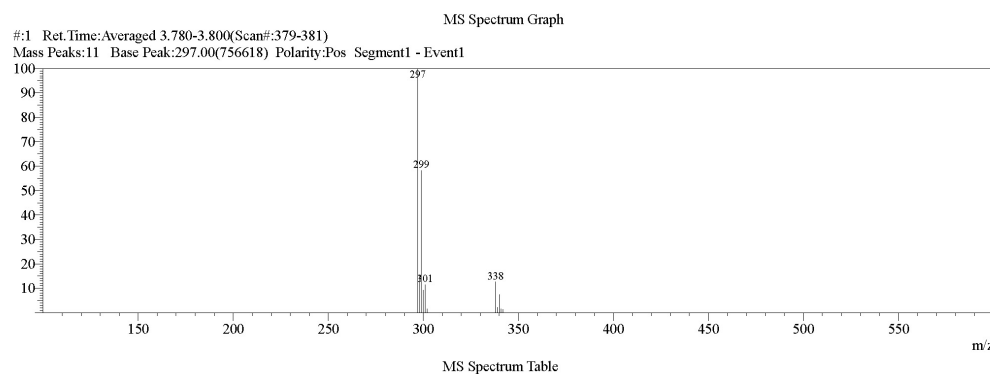

MS Spectrum Table

#1 Ret.Time:  
 BG Mode:Calc 3.680<->4.090(369<->410)  
 Mass Peaks:11 Base Peak:297.00(756618) Polarity:Pos Segment1 - Event1

| # | m/z    | Abs.Inten. | Rel.Inten. | Charge | Polarity | Monoisotopic | #  | m/z    | Abs.Inten. | Rel.Inten. | Charge | Polarity | Monoisotopic |
|---|--------|------------|------------|--------|----------|--------------|----|--------|------------|------------|--------|----------|--------------|
| 1 | 297.00 | 756618     | 100.00     |        |          |              | 7  | 338.00 | 95139      | 12.57      |        |          |              |
| 2 | 298.00 | 113869     | 15.05      |        |          |              | 8  | 339.05 | 16956      | 2.24       |        |          |              |
| 3 | 299.00 | 440277     | 58.19      |        |          |              | 9  | 340.05 | 55883      | 7.39       |        |          |              |
| 4 | 300.00 | 70642      | 9.34       |        |          |              | 10 | 341.05 | 11650      | 1.54       |        |          |              |
| 5 | 300.95 | 87257      | 11.53      |        |          |              | 11 | 341.95 | 9945       | 1.31       |        |          |              |
| 6 | 302.00 | 11893      | 1.57       |        |          |              |    |        |            |            |        |          |              |

**Figure S15 LCMS spectrum of compound NPD-0548**

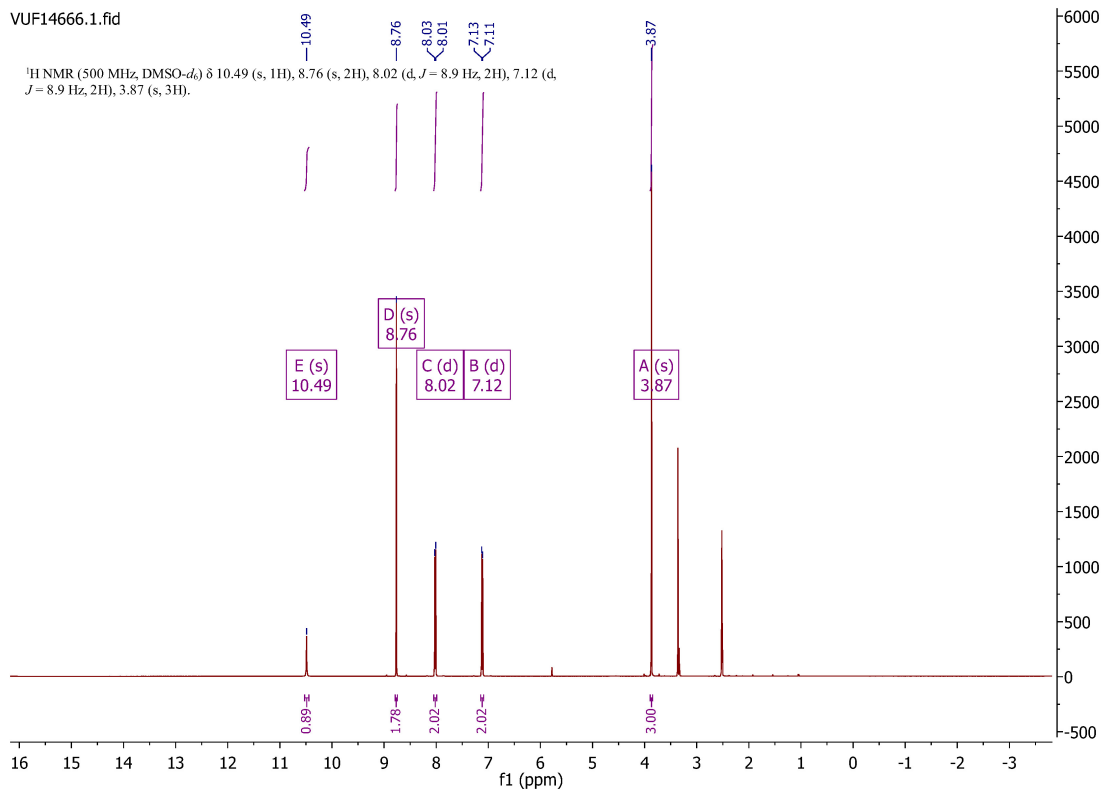

Figure S16  $^1\text{H}$  NMR spectrum of compound NPD-0548

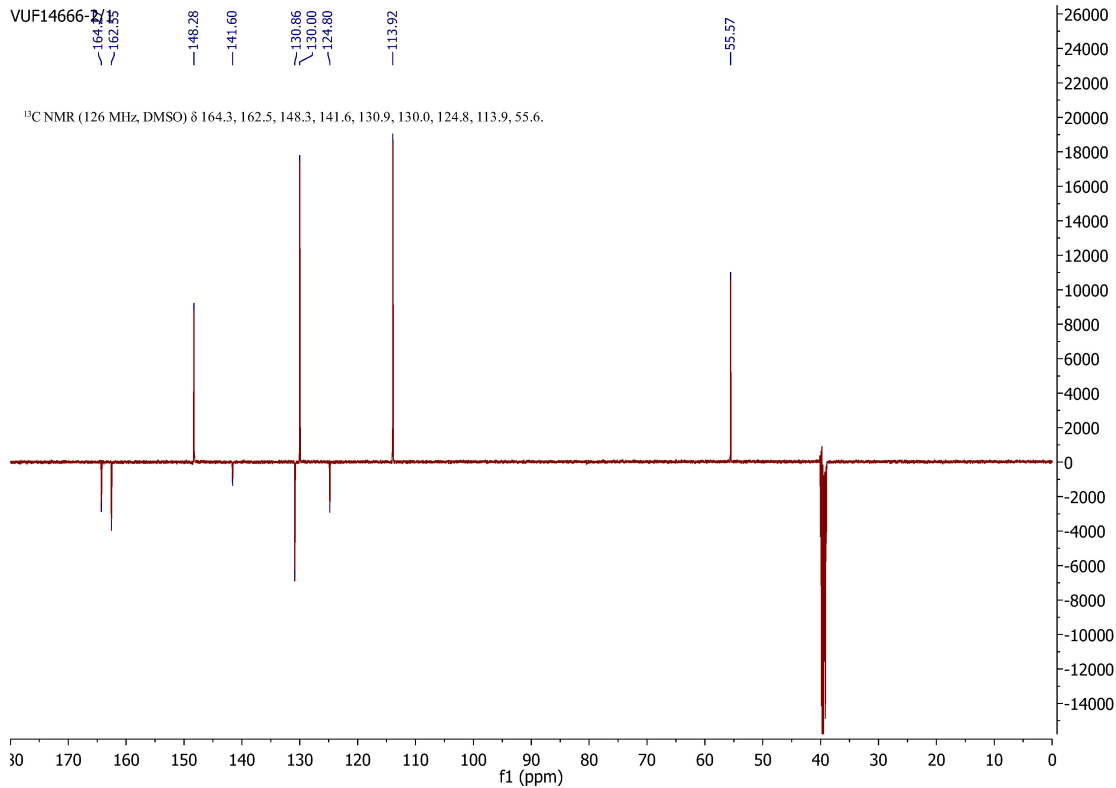

Figure S17  $^{13}\text{C}$  NMR spectrum of compound NPD-0548

Acquired by : Admin  
 Date Acquired : 10/15/2015 4:57:07 PM  
 Sample Name : YAZH-005  
 Sample ID :  
 Tray# : 1  
 Vial# : 3  
 Injection Volume : 1  
 Data File : C:\LabSolutions\Data\2015\2015-wk42\YAZH-005.lcd  
 Background File : blanco 16102016.lcd  
 Method File : Method SCAN ACID standard.lcm  
 Report Format : DefaultL.CMS.lcr  
 Tuning File : C:\LabSolutions\Tuning File\Tuning-ESI-pos-neg01072015.lct  
 Processed by : Admin  
 Modified Date : 10/16/2015 4:42:28 PM

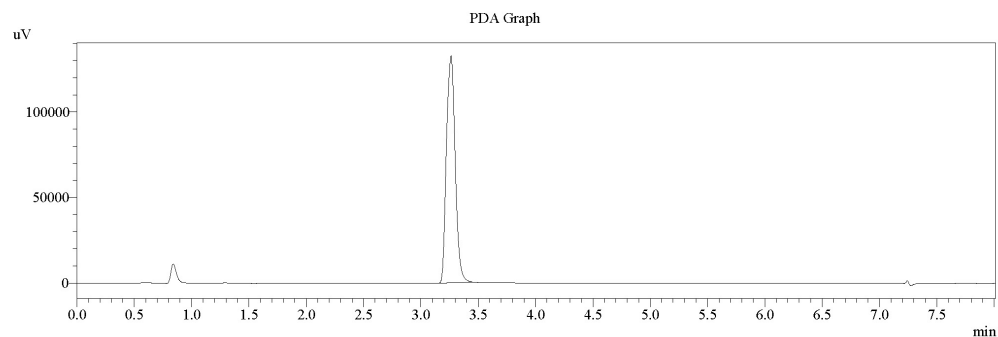

PDA Ch1 254nm 4nm

| Peak# | Name | Ret. Time | Area   | Area %  |
|-------|------|-----------|--------|---------|
| 1     |      | 3.258     | 710577 | 100.000 |

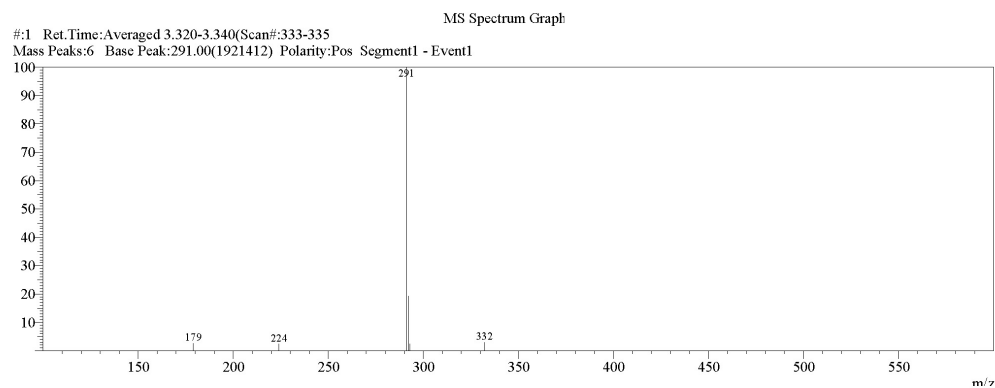

MS Spectrum Table

#1 Ret.Time:  
 BG Mode:Calc 3.190<=>3.560(320<=>357)  
 Mass Peaks:6 Base Peak:291.00(1921412) Polarity:Pos Segment1 - Event1

| # | m/z    | Abs.Inten. | Rel.Inten. | Charge | Polarity | Monoisotopic | # | m/z    | Abs.Inten. | Rel.Inten. | Charge | Polarity | Monoisotopic |
|---|--------|------------|------------|--------|----------|--------------|---|--------|------------|------------|--------|----------|--------------|
| 1 | 179.00 | 50991      | 2.65       |        |          |              | 4 | 292.05 | 369332     | 19.22      |        |          |              |
| 2 | 224.10 | 45000      | 2.34       |        |          |              | 5 | 293.05 | 44757      | 2.33       |        |          |              |
| 3 | 291.00 | 1921412    | 100.00     |        |          |              | 6 | 332.10 | 56581      | 2.94       |        |          |              |

**Figure S18 LCMS spectrum of compound NPD-1177**

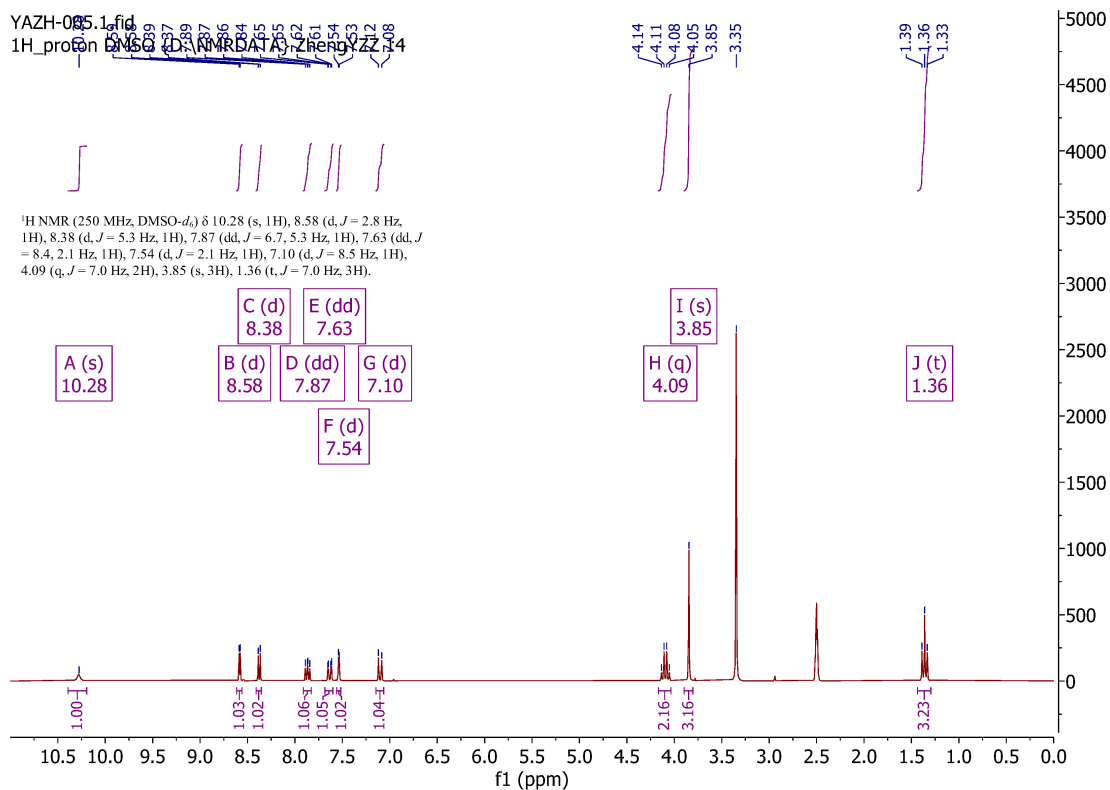

Figure S19 <sup>1</sup>H NMR spectrum of compound NPD-1177

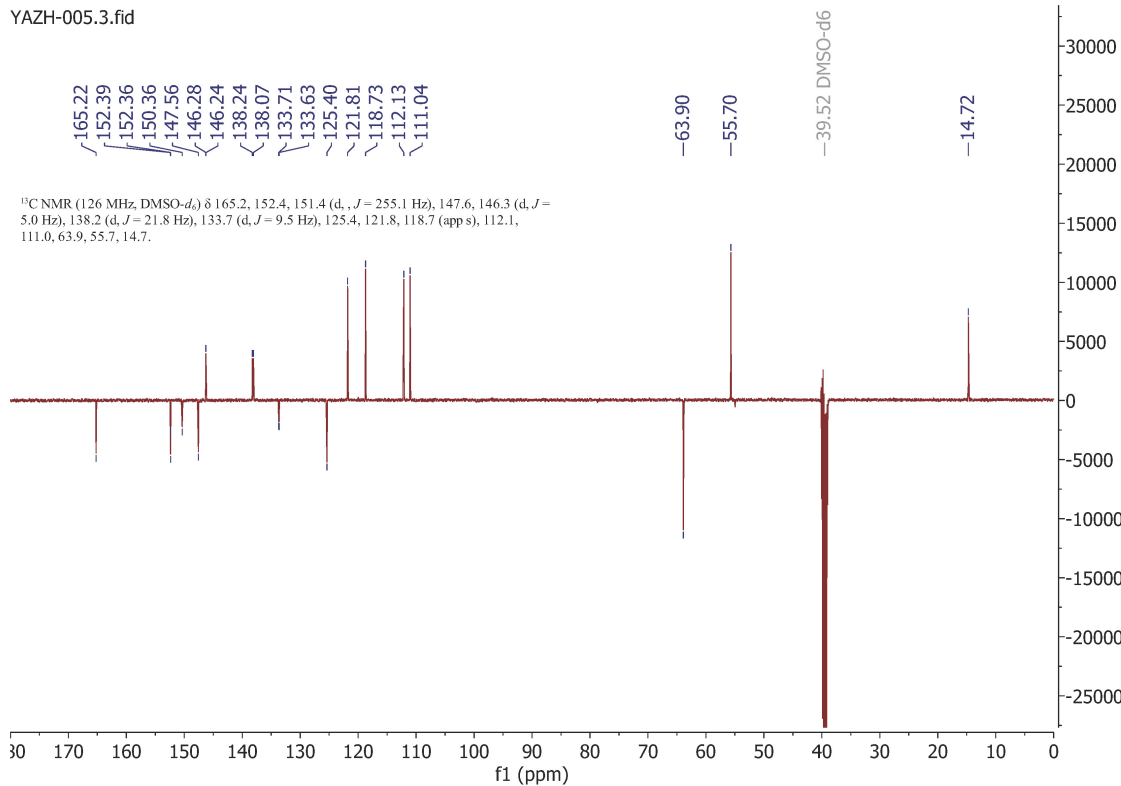

Figure S20 <sup>13</sup>C NMR spectrum of compound NPD-1177

Acquired by : Admin  
 Date Acquired : 10/15/2015 5:05:45 PM  
 Sample Name : YAZH-006  
 Sample ID :  
 Tray# : 1  
 Vial# : 4  
 Injection Volume : 1  
 Data File : C:\LabSolutions\Data\2015\2015-wk42\YAZH-006.lcd  
 Background File : blanco 16102016.lcd  
 Method File : Method SCAN ACID standard.lcm  
 Report Format : DefaultL.CMS.lcr  
 Tuning File : C:\LabSolutions\Tuning File\Tuning-ESI-pos-neg01072015.lct  
 Processed by : Admin  
 Modified Date : 10/16/2015 9:12:10 AM

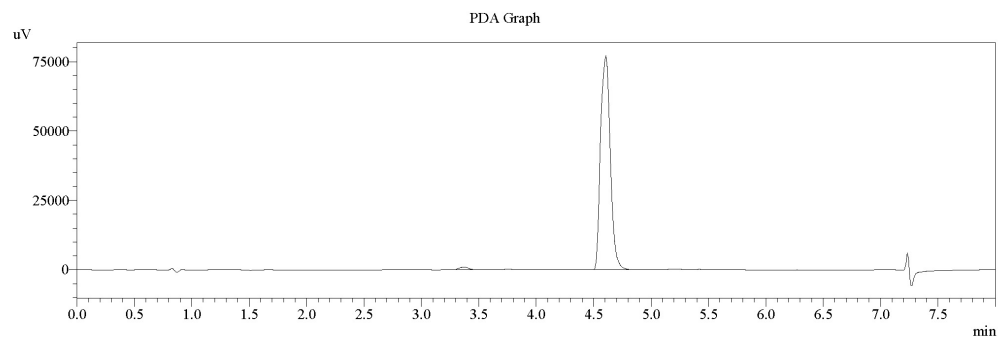

PDA Ch1 254nm 4nm

| Peak# | Name | Ret. Time | Area   | Area % |
|-------|------|-----------|--------|--------|
| 1     |      | 3.368     | 5235   | 1.147  |
| 2     |      | 4.601     | 451033 | 98.853 |

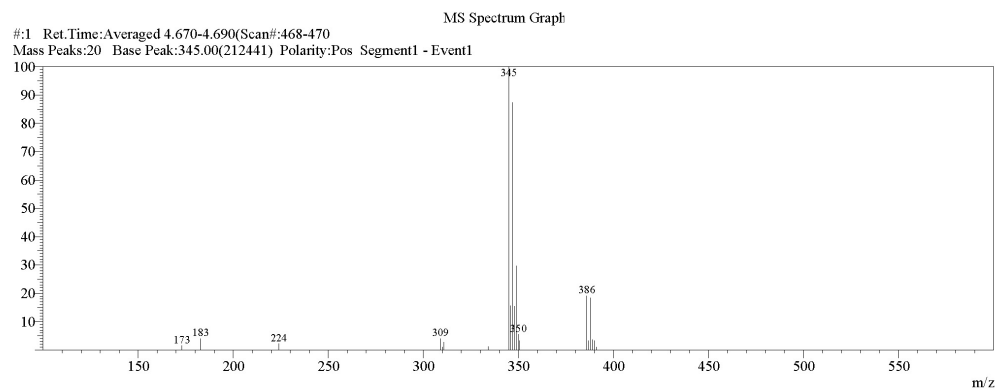

MS Spectrum Table

#1 Ret.Time:  
 BG Mode:Calc 4.550<->4.900(456<->491)

| #  | m/z    | Abs.Inten. | Rel.Inten. | Charge | Polarity | Monoisotopic |
|----|--------|------------|------------|--------|----------|--------------|
| 1  | 173.00 | 3126       | 1.47       |        |          |              |
| 2  | 182.90 | 8434       | 3.97       |        |          |              |
| 3  | 223.95 | 4605       | 2.17       |        |          |              |
| 4  | 308.95 | 8497       | 4.00       |        |          |              |
| 5  | 310.10 | 2352       | 1.11       |        |          |              |
| 6  | 310.80 | 5736       | 2.70       |        |          |              |
| 7  | 334.20 | 2461       | 1.16       |        |          |              |
| 8  | 345.00 | 212441     | 100.00     |        |          |              |
| 9  | 345.90 | 33033      | 15.55      |        |          |              |
| 10 | 346.95 | 185495     | 87.32      |        |          |              |
| 11 | 348.00 | 32728      | 15.41      |        |          |              |
| 12 | 348.95 | 63089      | 29.70      |        |          |              |
| 13 | 350.00 | 11665      | 5.49       |        |          |              |
| 14 | 350.80 | 6922       | 3.26       |        |          |              |
| 15 | 386.05 | 40483      | 19.06      |        |          |              |
| 16 | 386.95 | 6898       | 3.25       |        |          |              |
| 17 | 387.90 | 39119      | 18.41      |        |          |              |
| 18 | 389.15 | 7650       | 3.60       |        |          |              |
| 19 | 390.05 | 6968       | 3.28       |        |          |              |
| 20 | 391.05 | 2142       | 1.01       |        |          |              |

Figure S21 LCMS spectrum of compound NPD-1178

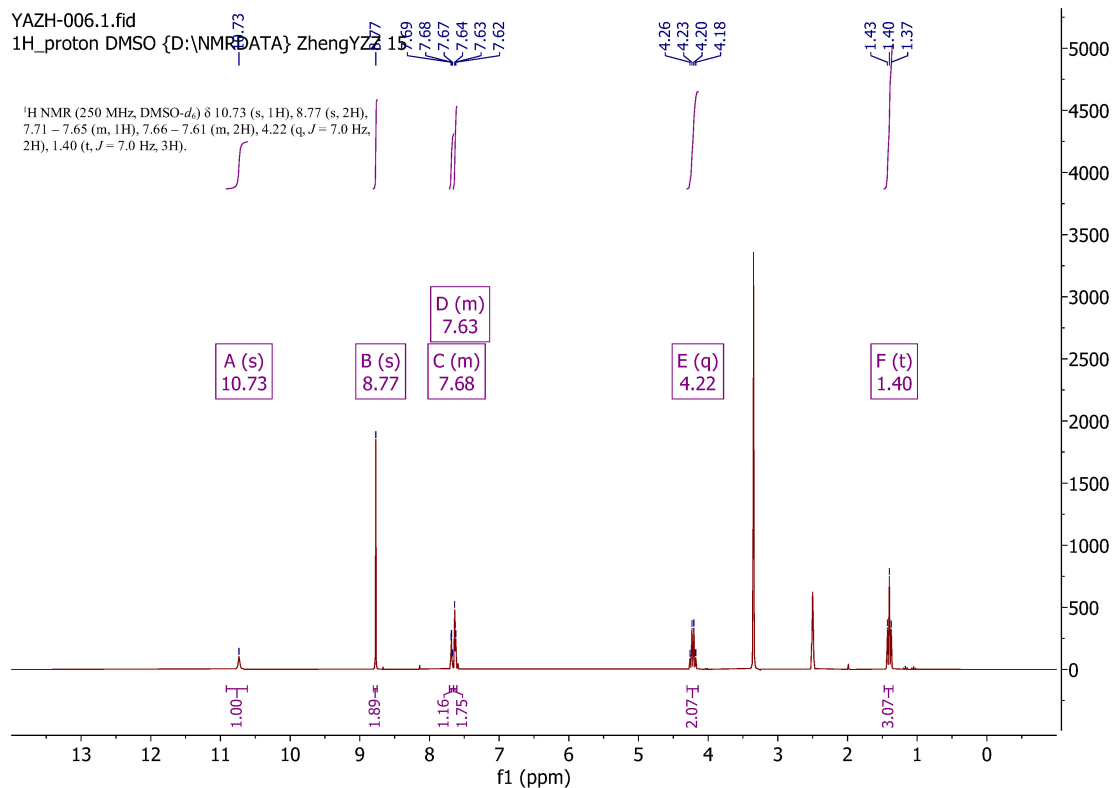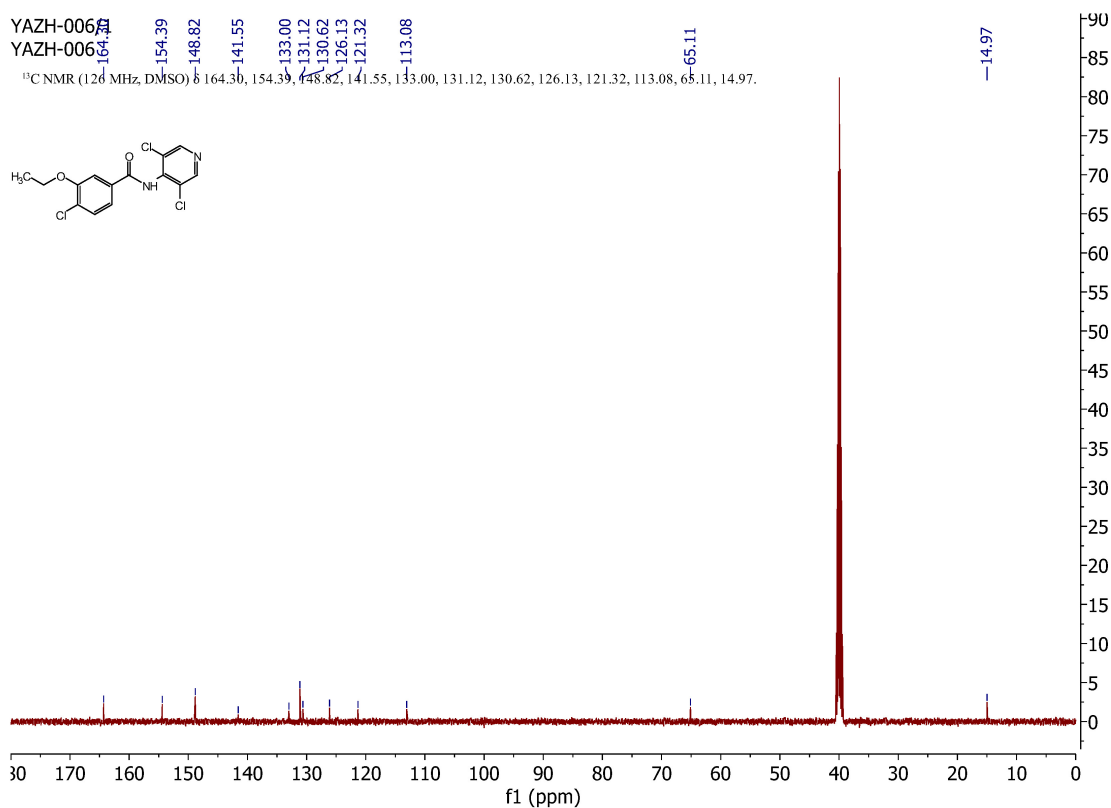



Acquired by : Admin  
 Date Acquired : 10/15/2015 5:14:23 PM  
 Sample Name : YAZH-007  
 Sample ID :  
 Tray# : 1  
 Vial# : 5  
 Injection Volume : 1  
 Data File : C:\LabSolutions\Data\2015\2015-wk42\YAZH-007.lcd  
 Background File : blanco 16102016.lcd  
 Method File : Method SCAN ACID standard.lcm  
 Report Format : DefaultL.CMS.lcr  
 Tuning File : C:\LabSolutions\Tuning File\Tuning-ESI-pos-neg01072015.lct  
 Processed by : Admin  
 Modified Date : 10/16/2015 9:14:19 AM

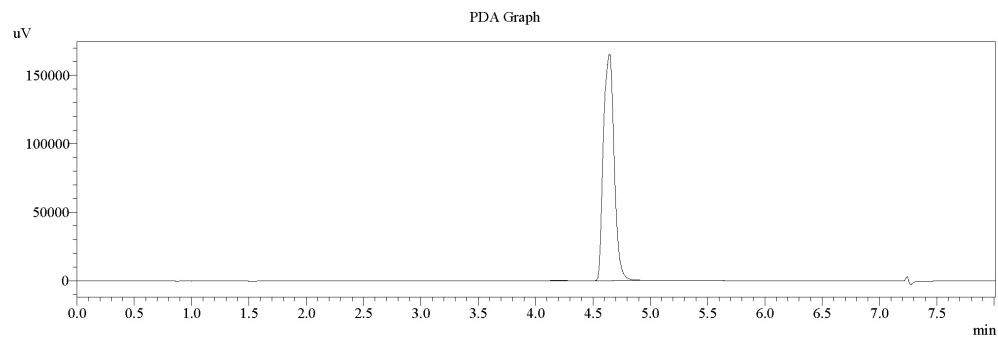

PDA Ch1 254nm 4nm

| Peak# | Name | Ret. Time | Area    | Area % |
|-------|------|-----------|---------|--------|
| 1     |      | 4.210     | 3214    | 0.297  |
| 2     |      | 4.639     | 1076423 | 99.535 |
| 3     |      | 5.231     | 1810    | 0.167  |

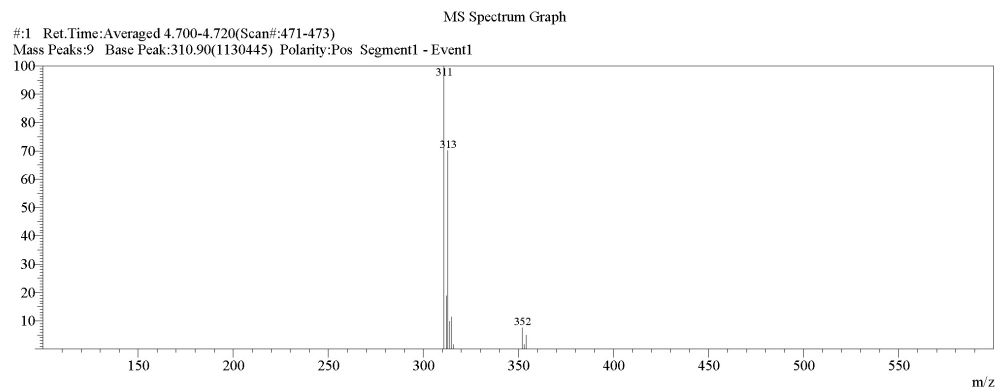

MS Spectrum Table

#1 Ret.Time:  
 BG Mode:Calc 4.560<->4.960(457<->497)

| # | m/z    | Abs.Inten. | Rel.Inten. | Charge | Polarity | Monoisotopic | # | m/z    | Abs.Inten. | Rel.Inten. | Charge | Polarity | Monoisotopic |
|---|--------|------------|------------|--------|----------|--------------|---|--------|------------|------------|--------|----------|--------------|
| 1 | 310.90 | 1130445    | 100.00     |        |          |              | 6 | 316.10 | 17698      | 1.57       |        |          |              |
| 2 | 312.00 | 212987     | 18.84      |        |          |              | 7 | 352.00 | 84880      | 7.51       |        |          |              |
| 3 | 312.95 | 792980     | 70.15      |        |          |              | 8 | 353.00 | 18323      | 1.62       |        |          |              |
| 4 | 314.00 | 111042     | 9.82       |        |          |              | 9 | 354.00 | 55399      | 4.90       |        |          |              |
| 5 | 315.00 | 129351     | 11.44      |        |          |              |   |        |            |            |        |          |              |

**Figure S24 LCMS spectrum of compound NPD-1179**

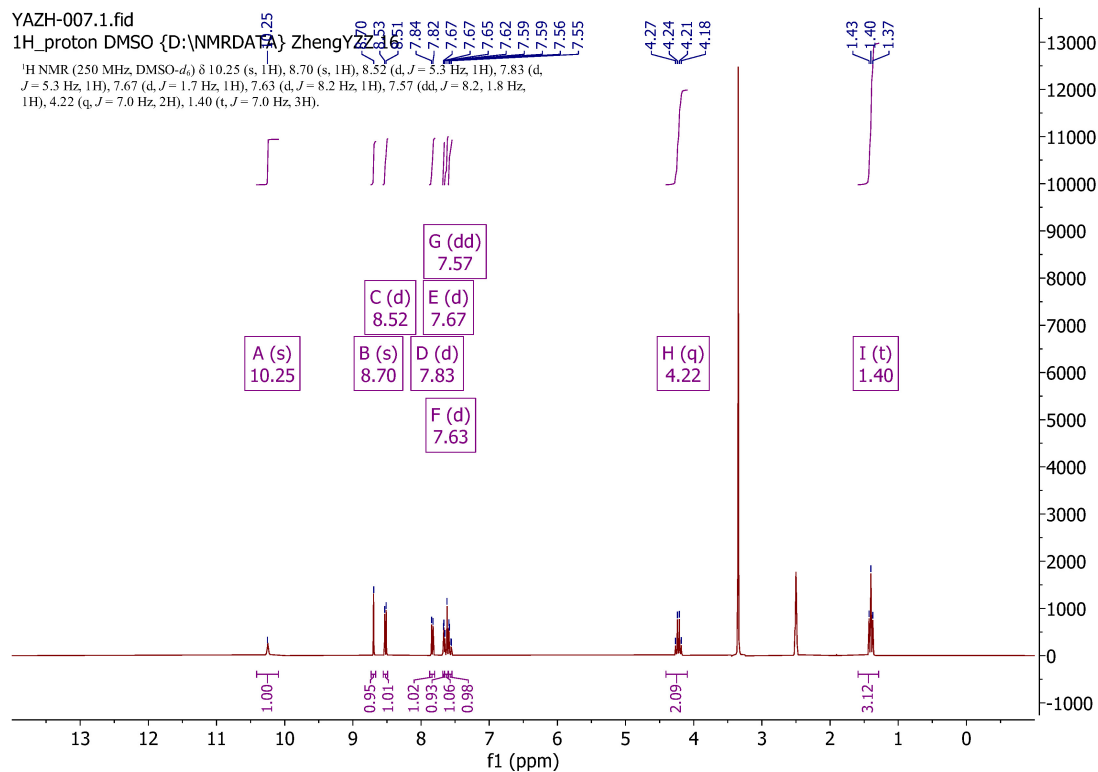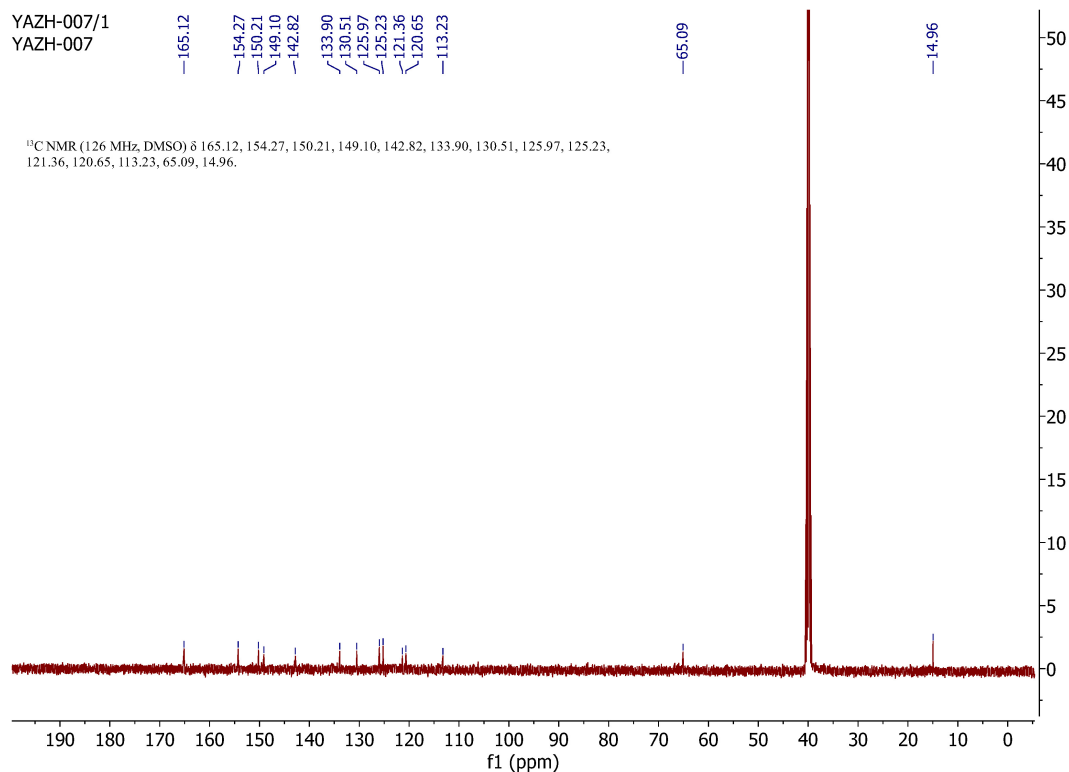

Acquired by : Admin  
 Date Acquired : 10/15/2015 5:57:41 PM  
 Sample Name : YAZH-012  
 Sample ID :  
 Tray# : 1  
 Vial# : 10  
 Injection Volume : 1  
 Data File : C:\LabSolutions\Data\2015\2015-wk42\YAZH-012.lcd  
 Background File : blanco 16102016.lcd  
 Method File : Method SCAN ACID standard.lcm  
 Report Format : DefaultL.CMS.lcr  
 Tuning File : C:\LabSolutions\Tuning File\Tuning-ESI-pos-neg01072015.lct  
 Processed by : Admin  
 Modified Date : 10/16/2015 9:36:21 AM

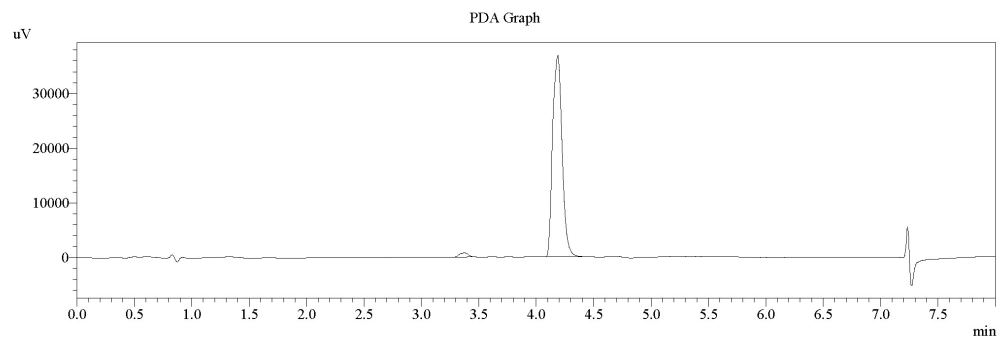

PDA Ch1 254nm 4nm

| Peak# | Name | Ret. Time | Area   | Area % |
|-------|------|-----------|--------|--------|
| 1     |      | 3.368     | 3970   | 1.836  |
| 2     |      | 4.183     | 212236 | 98.164 |

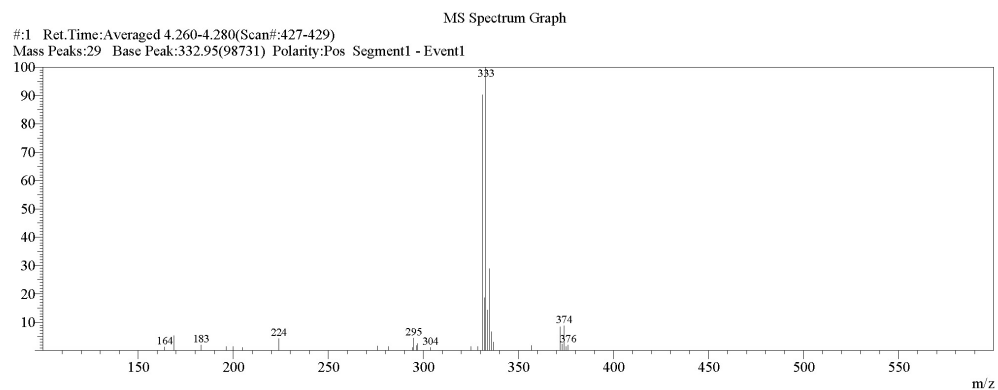

MS Spectrum Table

#1 Ret.Time:  
 BG Mode:Calc 4.140<->4.430(415<->444)

| #  | m/z    | Abs.Inten. | Rel.Inten. | Charge | Polarity | Monoisotopic | #  | m/z    | Abs.Inten. | Rel.Inten. | Charge | Polarity | Monoisotopic |
|----|--------|------------|------------|--------|----------|--------------|----|--------|------------|------------|--------|----------|--------------|
| 1  | 164.00 | 1285       | 1.30       |        |          |              | 15 | 325.15 | 1409       | 1.43       |        |          |              |
| 2  | 168.85 | 5260       | 5.33       |        |          |              | 16 | 328.75 | 1447       | 1.47       |        |          |              |
| 3  | 183.00 | 2007       | 2.03       |        |          |              | 17 | 330.90 | 89102      | 90.25      |        |          |              |
| 4  | 196.15 | 1366       | 1.38       |        |          |              | 18 | 332.00 | 18499      | 18.74      |        |          |              |
| 5  | 199.95 | 1394       | 1.41       |        |          |              | 19 | 332.95 | 98731      | 100.00     |        |          |              |
| 6  | 204.75 | 1083       | 1.10       |        |          |              | 20 | 333.85 | 14089      | 14.27      |        |          |              |
| 7  | 223.85 | 4249       | 4.30       |        |          |              | 21 | 334.95 | 28552      | 28.92      |        |          |              |
| 8  | 275.85 | 1686       | 1.71       |        |          |              | 22 | 335.90 | 6508       | 6.59       |        |          |              |
| 9  | 281.85 | 1477       | 1.50       |        |          |              | 23 | 337.00 | 2904       | 2.94       |        |          |              |
| 10 | 294.20 | 1034       | 1.05       |        |          |              | 24 | 357.00 | 1712       | 1.73       |        |          |              |
| 11 | 294.80 | 4317       | 4.37       |        |          |              | 25 | 371.95 | 8292       | 8.40       |        |          |              |
| 12 | 296.20 | 1779       | 1.80       |        |          |              | 26 | 373.00 | 2227       | 2.26       |        |          |              |
| 13 | 296.80 | 2477       | 2.51       |        |          |              | 27 | 374.00 | 8706       | 8.82       |        |          |              |
| 14 | 303.80 | 1057       | 1.07       |        |          |              | 28 | 374.95 | 1519       | 1.54       |        |          |              |

Figure S27 LCMS spectrum of compound NPD-1180

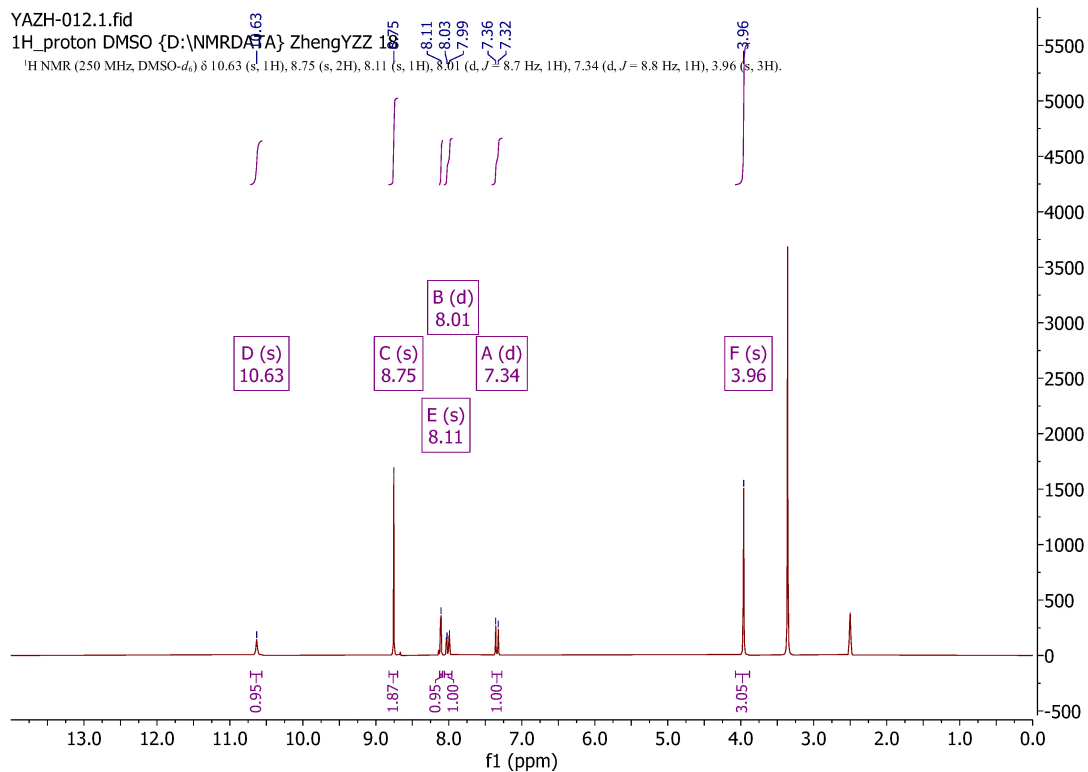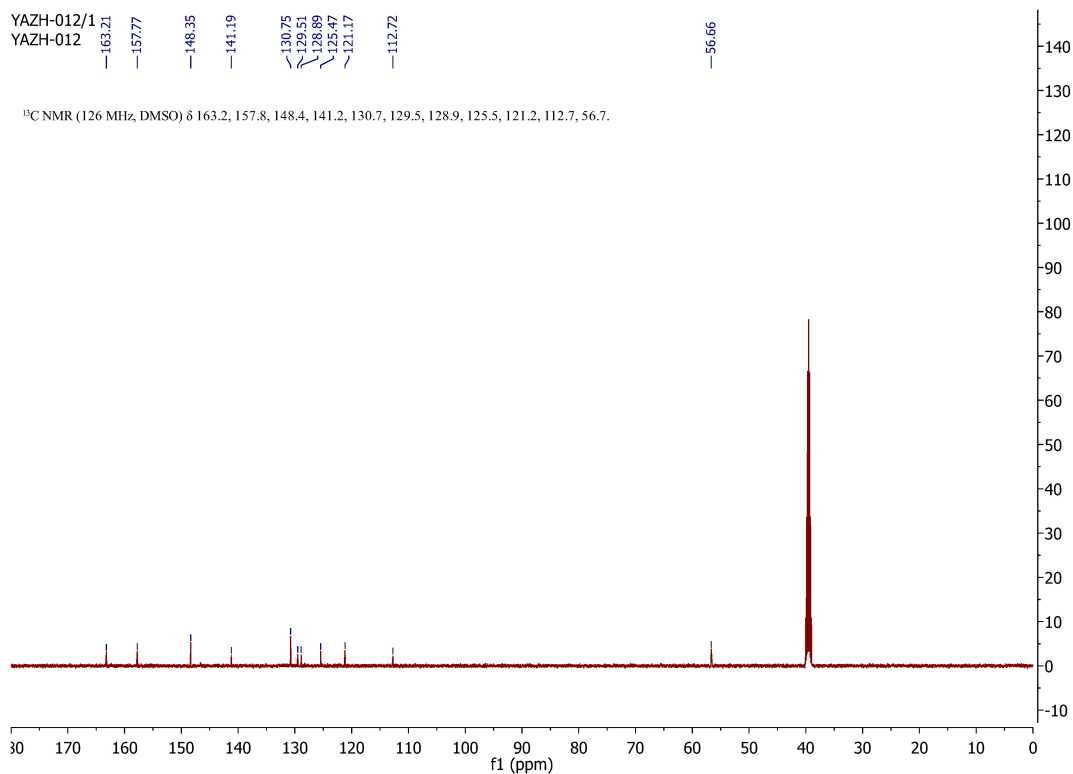

Acquired by : Admin  
 Date Acquired : 10/15/2015 6:06:19 PM  
 Sample Name : YAZH-013  
 Sample ID :  
 Tray# : 1  
 Vial# : 11  
 Injection Volume : 1  
 Data File : C:\LabSolutions\Data\2015\2015-wk42\YAZH-013.lcd  
 Background File : blanco 16102016.lcd  
 Method File : Method SCAN ACID standard.lcm  
 Report Format : Default1.CMS.lcr  
 Tuning File : C:\LabSolutions\Tuning File\Tuning-ESI-pos-neg01072015.lct  
 Processed by : Admin  
 Modified Date : 10/16/2015 9:38:45 AM

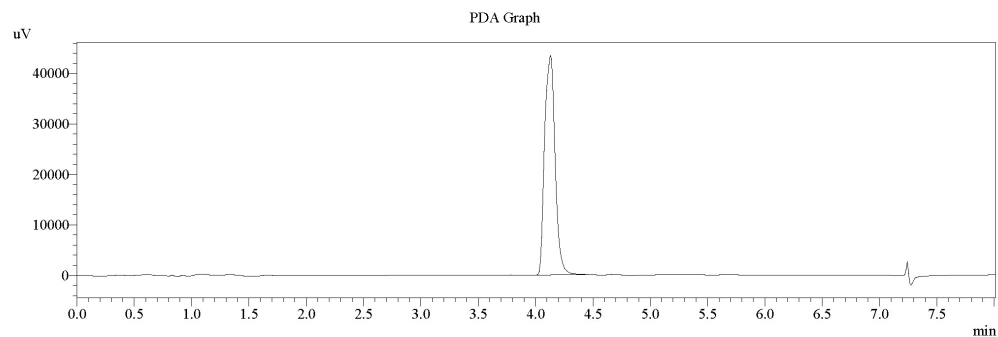

PDA Ch1 254nm 4nm

| Peak# | Name | Ret. Time | Area   | Area %  |
|-------|------|-----------|--------|---------|
| 1     |      | 4.125     | 275772 | 100.000 |

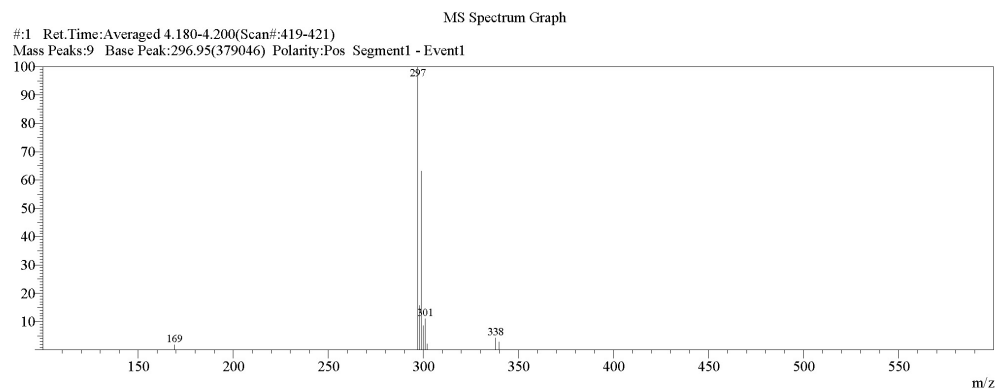

MS Spectrum Table

#1 Ret.Time:  
 BG Mode:Calc 4.050<->4.410(406<->442)

Mass Peaks:9 Base Peak:296.95(379046) Polarity:Pos Segment1 - Event1

| # | m/z    | Abs.Inten. | Rel.Inten. | Charge | Polarity | Monoisotopic | # | m/z    | Abs.Inten. | Rel.Inten. | Charge | Polarity | Monoisotopic |
|---|--------|------------|------------|--------|----------|--------------|---|--------|------------|------------|--------|----------|--------------|
| 1 | 169.00 | 6886       | 1.82       |        |          |              | 6 | 300.95 | 41810      | 11.03      |        |          |              |
| 2 | 296.95 | 379046     | 100.00     |        |          |              | 7 | 301.95 | 7970       | 2.10       |        |          |              |
| 3 | 298.00 | 59840      | 15.79      |        |          |              | 8 | 337.90 | 15932      | 4.20       |        |          |              |
| 4 | 299.00 | 239611     | 63.21      |        |          |              | 9 | 339.95 | 10560      | 2.79       |        |          |              |
| 5 | 300.00 | 32198      | 8.49       |        |          |              |   |        |            |            |        |          |              |

**Figure S30 LCMS spectrum of compound NPD-1181**

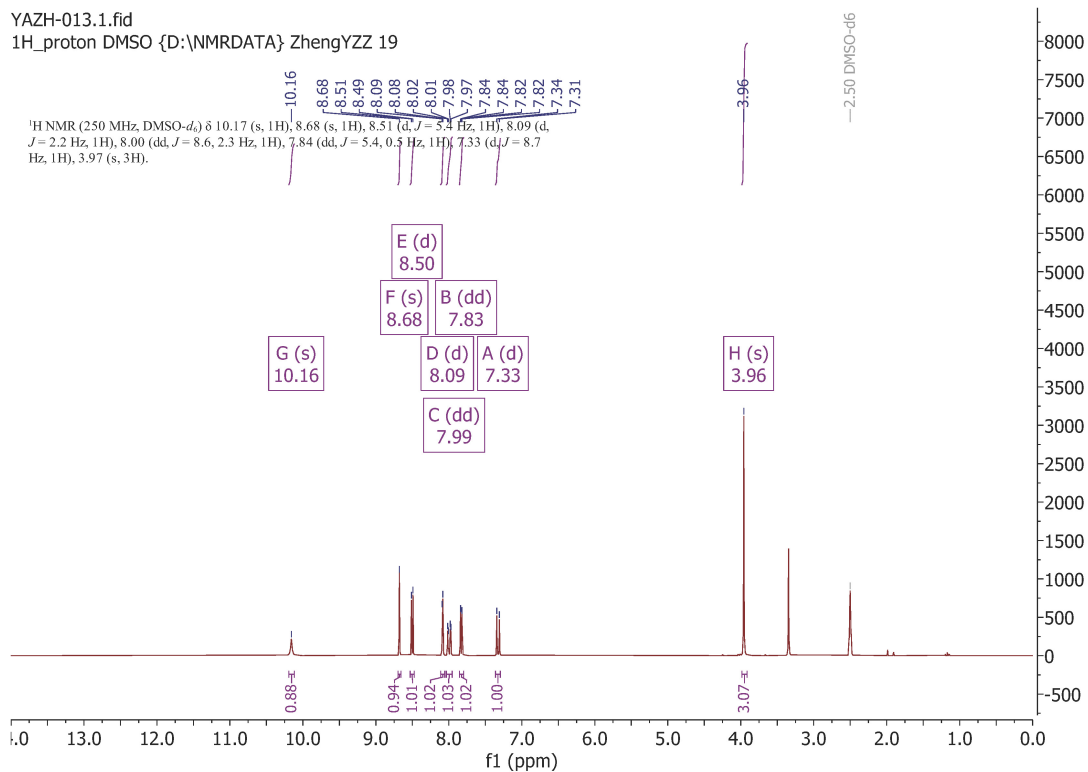

Figure S31 <sup>1</sup>H NMR spectrum of compound NPD-1181

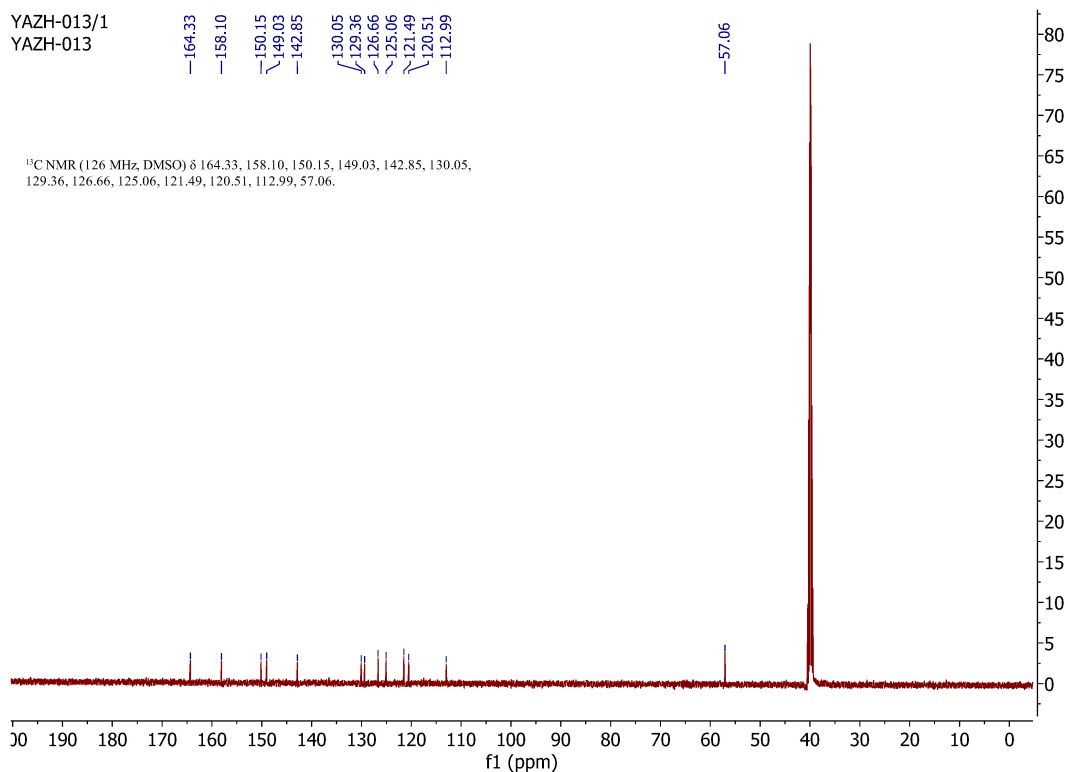

Figure S32 <sup>13</sup>C NMR spectrum of compound NPD-1181

Acquired by : Admin  
Date Acquired : 10/5/2019 3:42:14 PM  
Sample Name : YAZH-014  
Sample ID :  
Tray# : 1  
Vial# : 36  
Injection Volume : 3  
Data File : C:\LabSolutions\Data\2019-wk19\YAZH-014.lcd  
Background File : blanco 10052019.lcd  
Method File : Method SCAN ACID standard.lcm  
Report Format : DefaultL.CMS.lcr  
Tuning File : C:\LabSolutions\Tuning\Tuning-ESI-pos-neg01072015a.lct  
Processed by : Admin  
Modified Date : 10/5/2019 4:20:45 PM

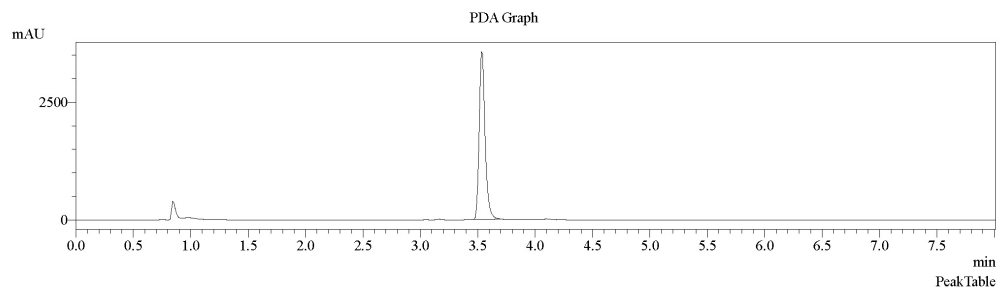

| Peak# | Name | Ret. Time | Area     | Area %  |
|-------|------|-----------|----------|---------|
| 1     |      | 3.530     | 12764741 | 100.000 |

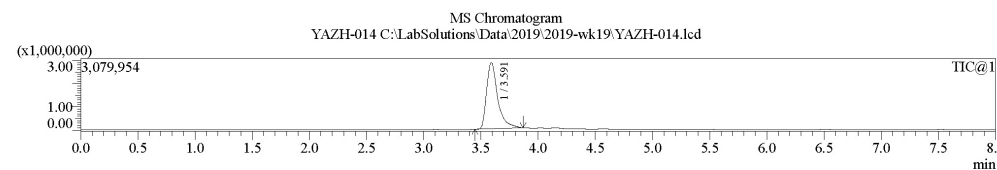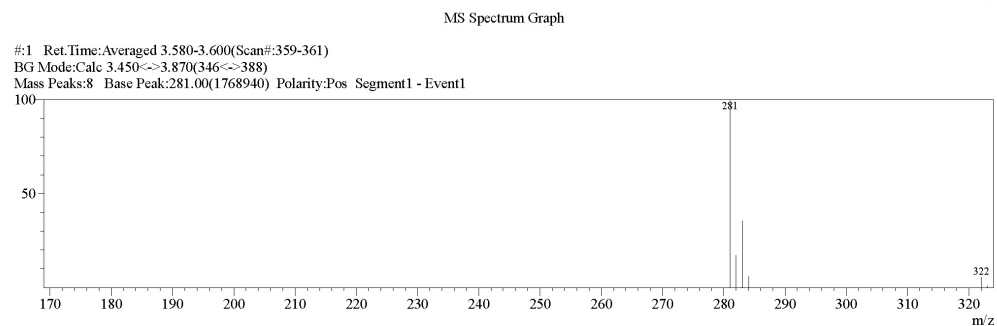

MS Spectrum Table

| # | m/z    | Abs.Inten. | Rel.Inten. | Charge | Polarity | Monoisotopic |
|---|--------|------------|------------|--------|----------|--------------|
| 1 | 169.00 | 18379      | 1.04       |        |          |              |
| 2 | 281.00 | 1768940    | 100.00     |        |          |              |
| 3 | 282.00 | 304788     | 17.23      |        |          |              |
| 4 | 283.00 | 629665     | 35.60      |        |          |              |
| 5 | 284.05 | 104172     | 5.89       |        |          |              |
| 6 | 322.05 | 94099      | 5.32       |        |          |              |
| 7 | 323.05 | 18549      | 1.05       |        |          |              |
| 8 | 324.05 | 33808      | 1.91       |        |          |              |

Figure S33 LCMS spectrum of compound NPD-1182

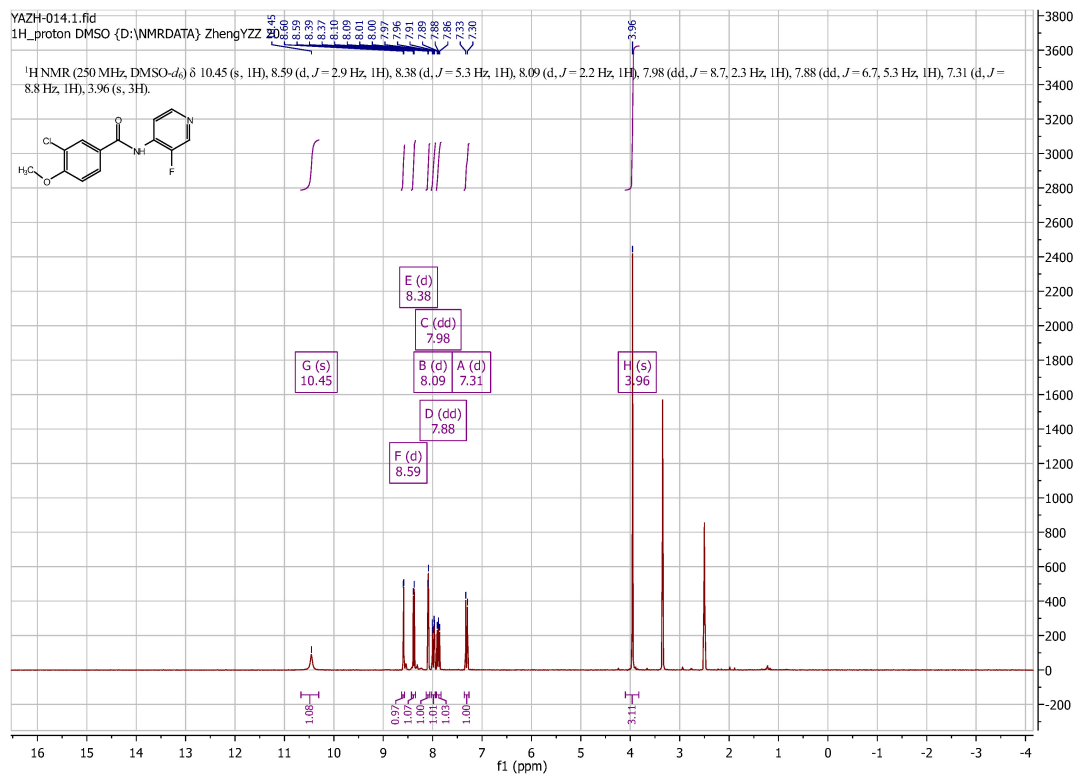

Figure S34 <sup>1</sup>H NMR spectrum of compound NPD-1182

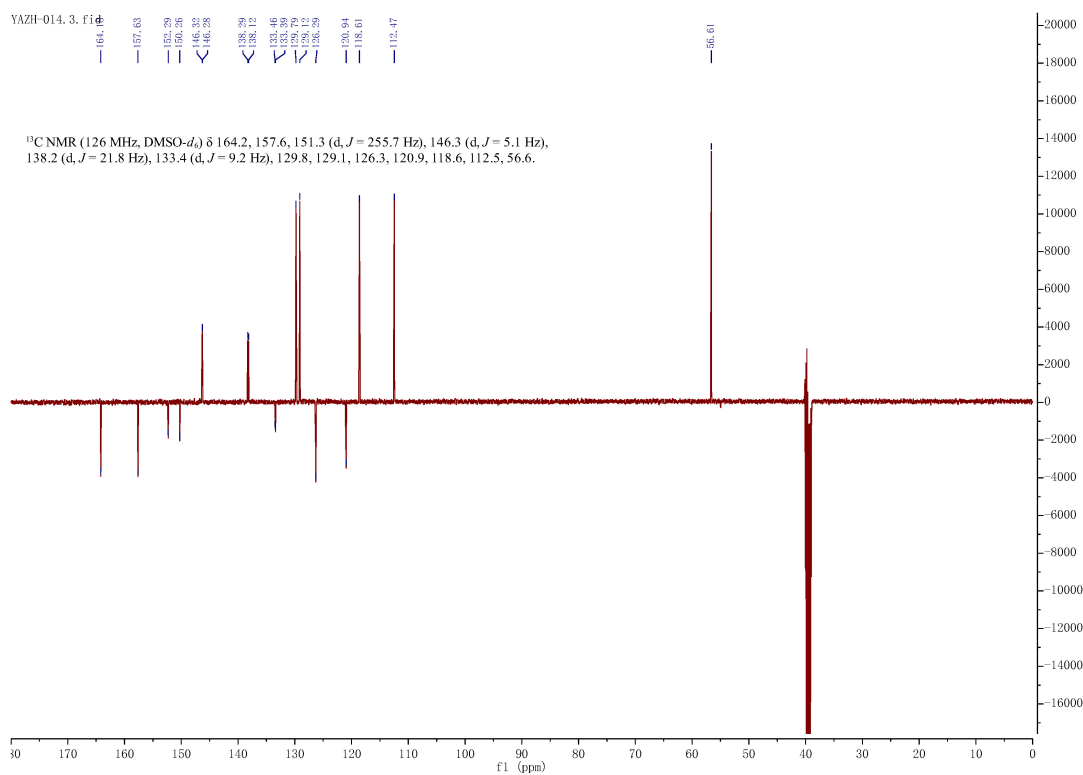

Figure S35 <sup>13</sup>C NMR spectrum of compound NPD-1182



Acquired by : Admin  
 Date Acquired : 10/15/2015 6:23:36 PM  
 Sample Name : YAZH-015  
 Sample ID :  
 Tray# : 1  
 Vial# : 13  
 Injection Volume : 1  
 Data File : C:\LabSolutions\Data\2015\2015-wk42\YAZH-015.lcd  
 Background File : blanco 16102016.lcd  
 Method File : Method SCAN ACID standard.lcm  
 Report Format : DefaultL.CMS.lcr  
 Tuning File : C:\LabSolutions\Tuning File\Tuning-ESI-pos-neg01072015.lct  
 Processed by : Admin  
 Modified Date : 10/16/2015 9:42:53 AM

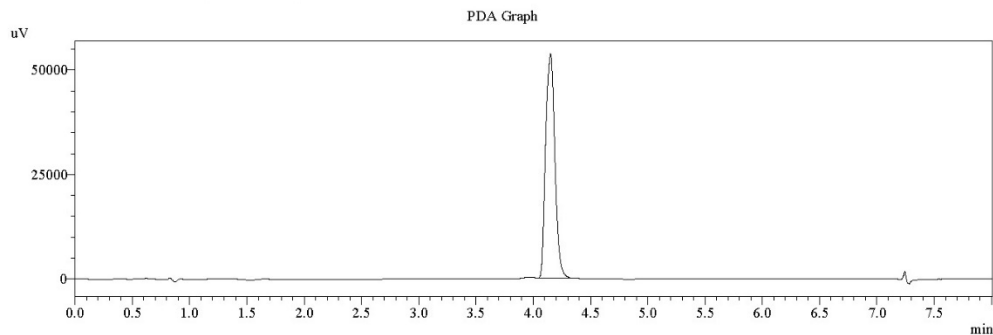

PDA Ch1 254nm 4nm

| Peak# | Name | Ret. Time | Area   | Area %  |
|-------|------|-----------|--------|---------|
| 1     |      | 4.146     | 301413 | 100.000 |

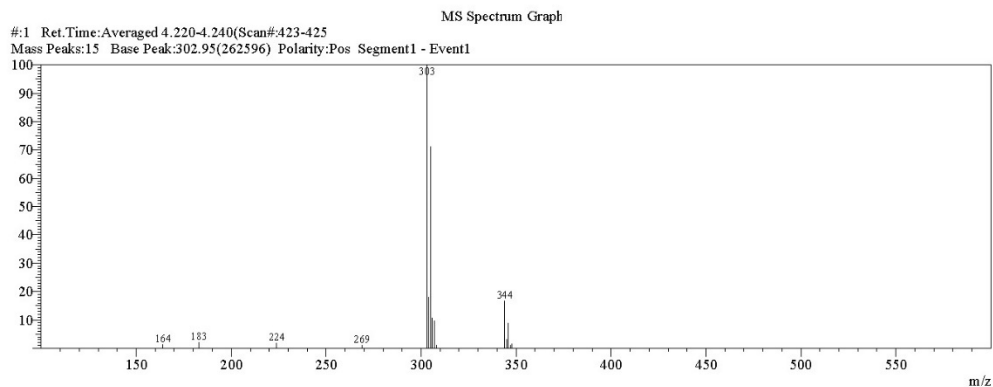

#1 Ret.Time:  
 BG Mode:Calc 4.100<=>4.450(411<=>446)

| #  | m/z    | Abs.Inten. | Rel.Inten. | Charge | Polarity | Monoisotopic |
|----|--------|------------|------------|--------|----------|--------------|
| 1  | 164.00 | 3498       | 1.33       |        |          |              |
| 2  | 182.95 | 5134       | 1.96       |        |          |              |
| 3  | 223.90 | 4892       | 1.86       |        |          |              |
| 4  | 268.85 | 2932       | 1.12       |        |          |              |
| 5  | 302.95 | 262596     | 100.00     |        |          |              |
| 6  | 303.95 | 46888      | 17.86      |        |          |              |
| 7  | 304.95 | 186816     | 71.14      |        |          |              |
| 8  | 305.85 | 27745      | 10.57      |        |          |              |
| 9  | 306.95 | 25124      | 9.57       |        |          |              |
| 10 | 308.05 | 2683       | 1.02       |        |          |              |
| 11 | 343.95 | 43986      | 16.75      |        |          |              |
| 12 | 345.15 | 8229       | 3.13       |        |          |              |
| 13 | 345.90 | 23230      | 8.85       |        |          |              |
| 14 | 347.00 | 2967       | 1.13       |        |          |              |
| 15 | 348.00 | 3792       | 1.44       |        |          |              |

Figure S36 LCMS spectrum of compound NPD-1183

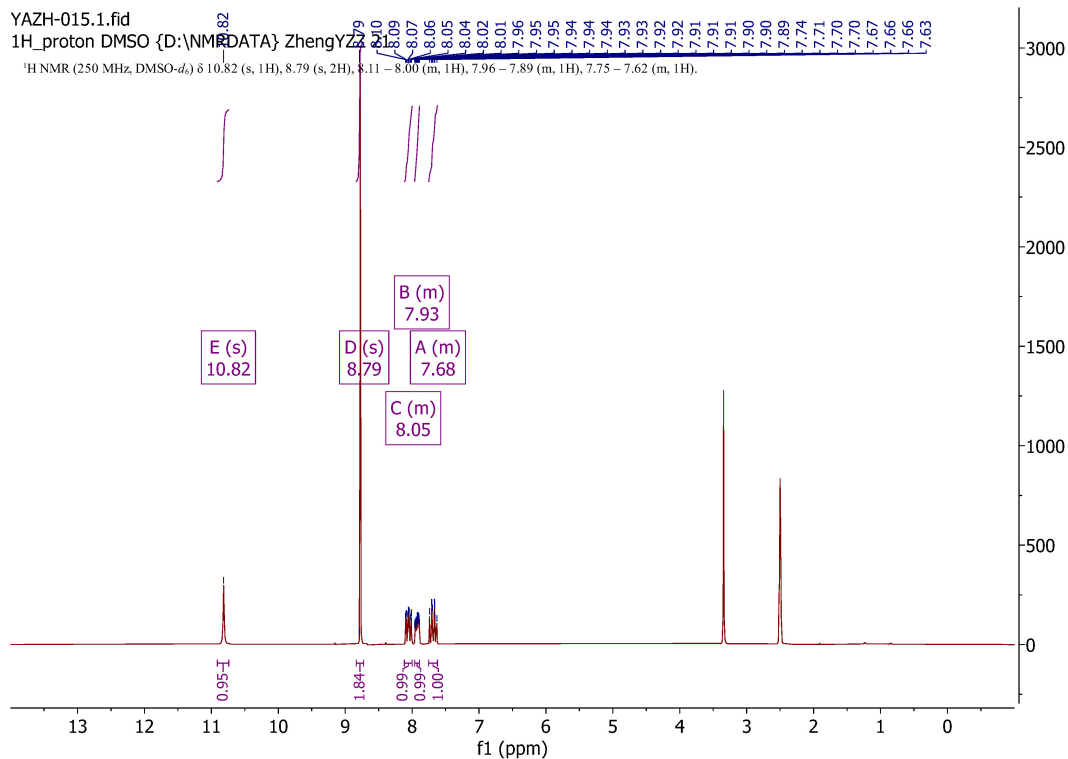

Figure S37  $^1\text{H}$  NMR spectrum of compound NPD-1183

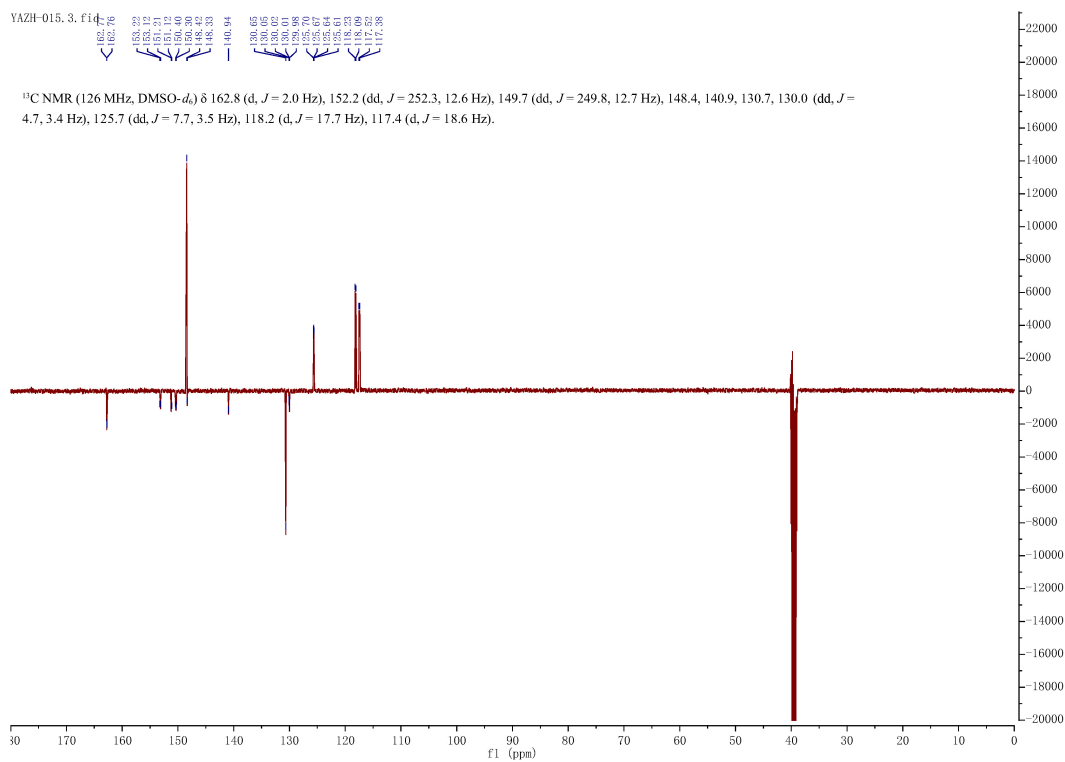

Figure S38  $^{13}\text{C}$  NMR spectrum of compound NPD-1183

Acquired by : Admin  
 Date Acquired : 10/15/2015 6:32:16 PM  
 Sample Name : YAZH-016  
 Sample ID :  
 Tray# : 1  
 Vial# : 14  
 Injection Volume : 1  
 Data File : C:\LabSolutions\Data\2015\2015-wk42\YAZH-016.lcd  
 Background File : blanco 16102016.lcd  
 Method File : Method SCAN ACID standard.lcm  
 Report Format : DefaultL.CMS.lcr  
 Tuning File : C:\LabSolutions\Tuning File\Tuning-ESI-pos-neg01072015.lct  
 Processed by : Admin  
 Modified Date : 10/16/2015 9:44:13 AM

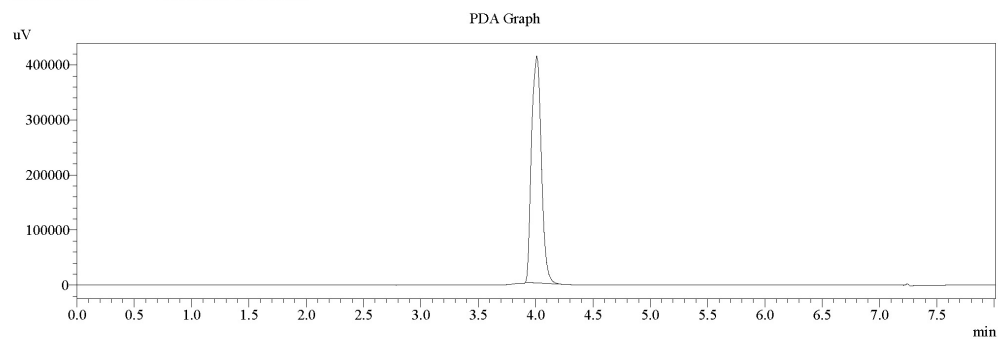

PDA Ch1 254nm 4nm

| Peak# | Name | Ret. Time | Area    | Area %  |
|-------|------|-----------|---------|---------|
| 1     |      | 4.006     | 2450571 | 100.000 |

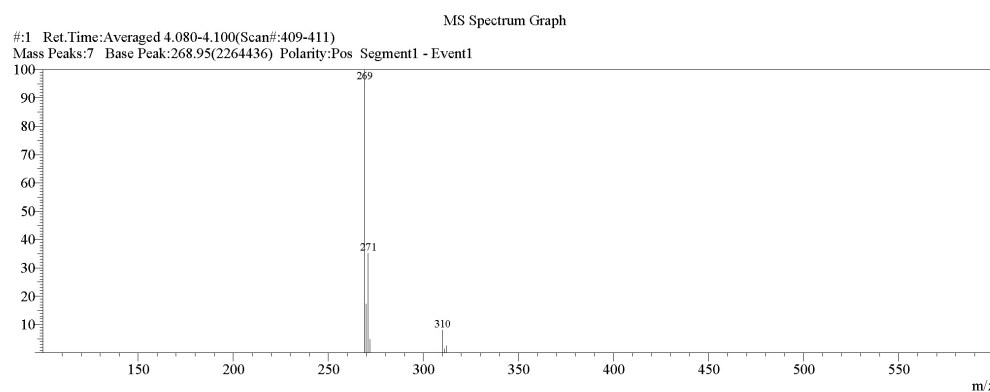

MS Spectrum Table

#1 Ret.Time:  
 BG Mode:Calc 3.920<->4.510(393<->452)

| # | m/z    | Abs.Inten. | Rel.Inten. | Charge | Polarity | Monoisotopic | # | m/z    | Abs.Inten. | Rel.Inten. | Charge | Polarity | Monoisotopic |
|---|--------|------------|------------|--------|----------|--------------|---|--------|------------|------------|--------|----------|--------------|
| 1 | 268.95 | 2264436    | 100.00     |        |          |              | 5 | 310.00 | 182863     | 8.08       |        |          |              |
| 2 | 269.95 | 390369     | 17.24      |        |          |              | 6 | 311.05 | 33790      | 1.49       |        |          |              |
| 3 | 270.95 | 795370     | 35.12      |        |          |              | 7 | 312.00 | 55214      | 2.44       |        |          |              |
| 4 | 272.00 | 109158     | 4.82       |        |          |              |   |        |            |            |        |          |              |

**Figure S39 LCMS spectrum of compound NPD-1184**

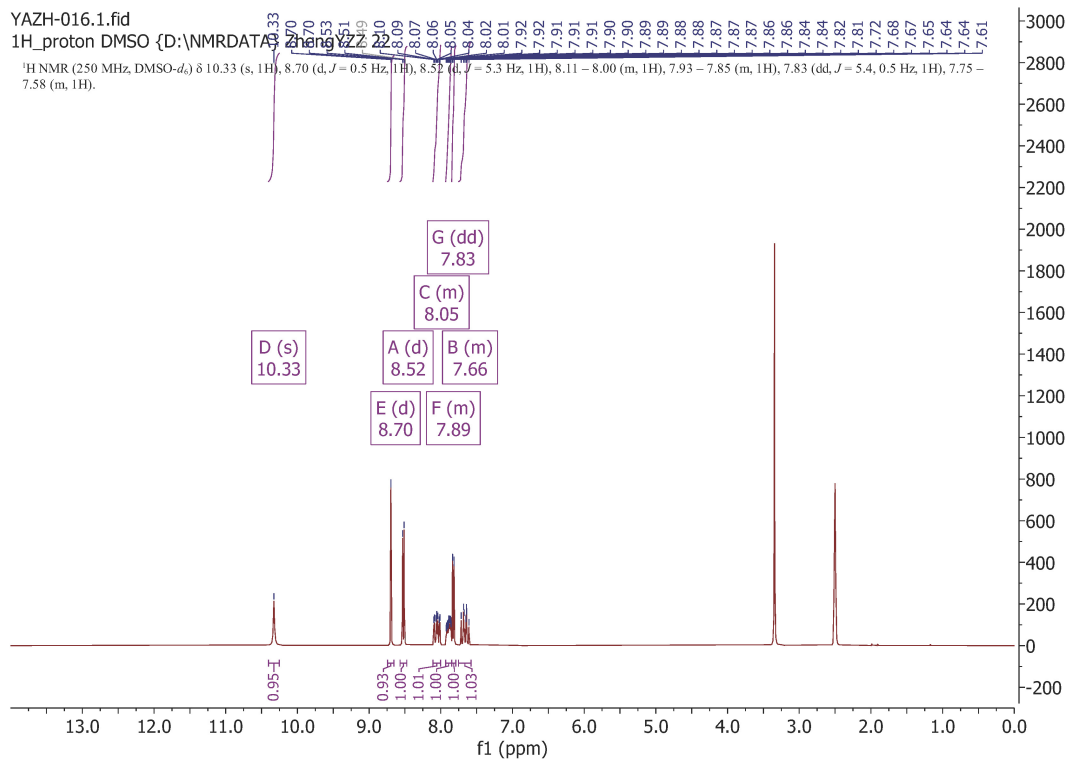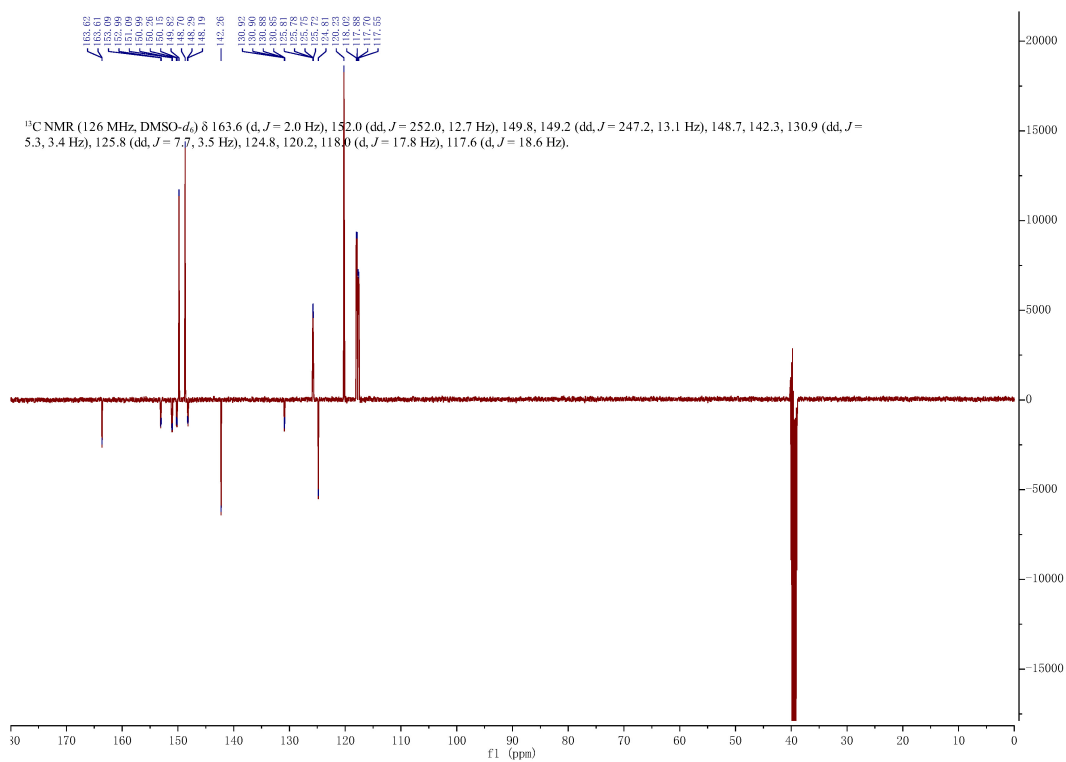

Acquired by : Admin  
 Date Acquired : 10/15/2015 6:40:56 PM  
 Sample Name : YAZH-017  
 Sample ID :  
 Tray# : 1  
 Vial# : 15  
 Injection Volume : 1  
 Data File : C:\LabSolutions\Data\2015\2015-wk42\YAZH-017.lcd  
 Background File : blanco 16102016.lcd  
 Method File : Method SCAN ACID standard.lcm  
 Report Format : DefaultL.CMS.lcr  
 Tuning File : C:\LabSolutions\Tuning File\Tuning-ESI-pos-neg01072015.lct  
 Processed by : Admin  
 Modified Date : 10/16/2015 9:45:29 AM

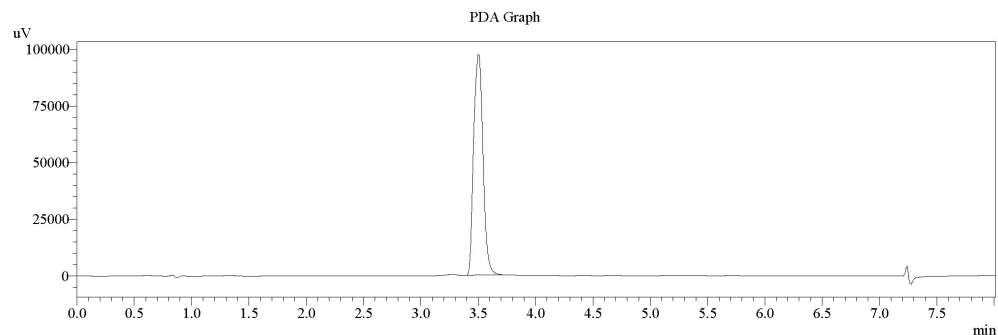

PDA Ch1 254nm 4nm

| Peak# | Name | Ret. Time | Area   | Area %  |
|-------|------|-----------|--------|---------|
| 1     |      | 3.498     | 548298 | 100.000 |

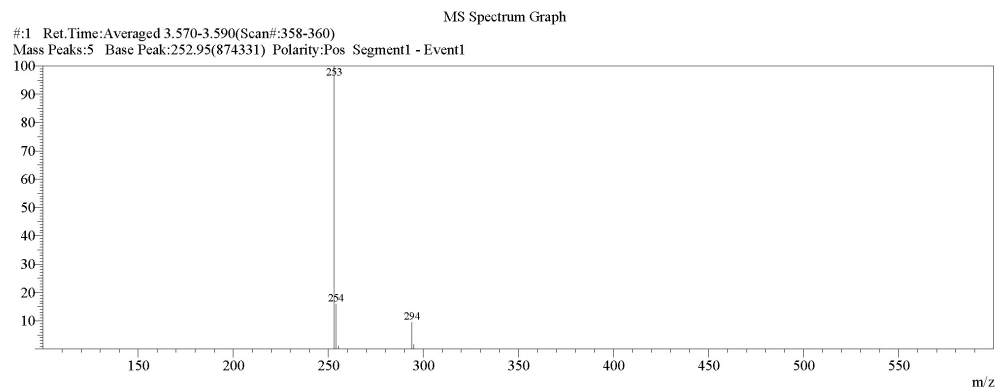

MS Spectrum Table

#1 Ret.Time:  
 BG Mode:Calc 3.450<->3.780(346<->379)  
 Mass Peaks:5 Base Peak:252.95(874331) Polarity:Pos Segment1 - Event

| # | m/z    | Abs.Inten. | Rel.Inten. | Charge | Polarity | Monoisotopic | # | m/z    | Abs.Inten. | Rel.Inten. | Charge | Polarity | Monoisotopic |
|---|--------|------------|------------|--------|----------|--------------|---|--------|------------|------------|--------|----------|--------------|
| 1 | 252.95 | 874331     | 100.00     |        |          |              | 4 | 294.00 | 82311      | 9.41       |        |          |              |
| 2 | 254.00 | 138589     | 15.85      |        |          |              | 5 | 294.90 | 14439      | 1.65       |        |          |              |
| 3 | 255.25 | 9793       | 1.12       |        |          |              |   |        |            |            |        |          |              |

**Figure S42 LCMS spectrum of compound NPD-1185**



Acquired by : Admin  
Date Acquired : 10/5/2019 3:59:27 PM  
Sample Name : YAZH-018  
Sample ID :  
Tray# : 1  
Vial# : 37  
Injection Volume : 3  
Data File : C:\LabSolutions\Data\2019-wk19\YAZH-018.lcd  
Background File : blanco 10052019.lcd  
Method File : Method SCAN ACID standard.lcm  
Report Format : DefaultL.CMS.lcr  
Tuning File : C:\LabSolutions\Tuning\Tuning-ESI-pos-neg01072015a.lct  
Processed by : Admin  
Modified Date : 10/5/2019 4:21:59 PM

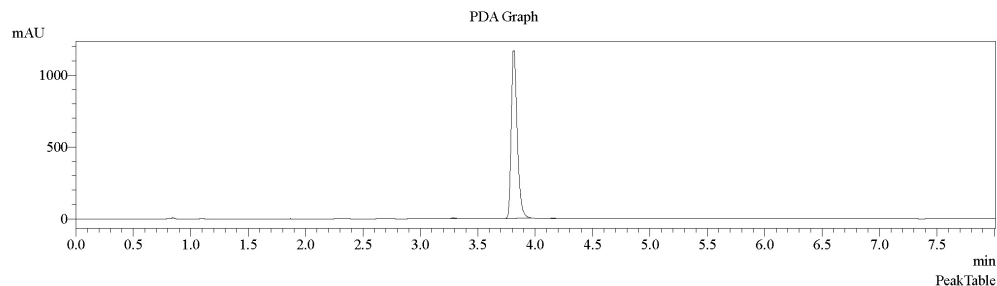

PDA Ch1 254nm 4nm

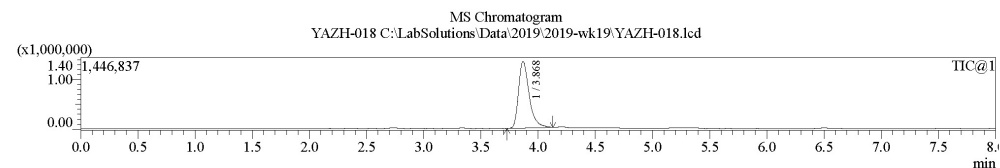

MS Spectrum Graph

#1 Ret.Time:Averaged 3.860-3.880(Scan#:387-389)  
BG Mode:Calc 3.730<=>4.130(374<=>414)  
Mass Peaks:9 Base Peak:341.00(627181) Polarity:Pos Segment1 - Event1

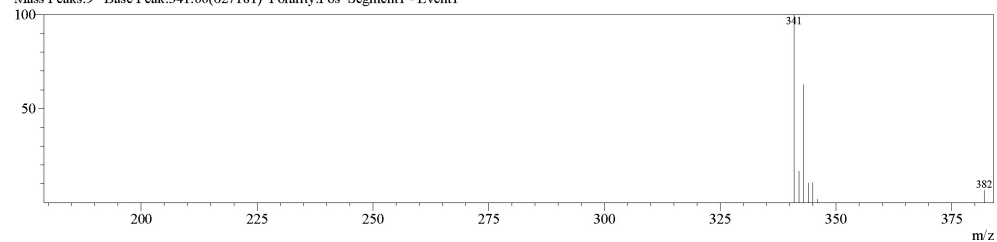

MS Spectrum Table

#1 Ret.Time:  
BG Mode:Calc 3.730<=>4.130(374<=>414)  
Mass Peaks:9 Base Peak:341.00(627181) Polarity:Pos Segment1 - Event1

| # | m/z    | Abs.Inten. | Rel.Inten. | Charge | Polarity | Monoisotopic | # | m/z    | Abs.Inten. | Rel.Inten. | Charge | Polarity | Monoisotopic |
|---|--------|------------|------------|--------|----------|--------------|---|--------|------------|------------|--------|----------|--------------|
| 1 | 179.00 | 23933      | 3.82       |        |          |              | 6 | 345.05 | 66619      | 10.62      |        |          |              |
| 2 | 341.00 | 627181     | 100.00     |        |          |              | 7 | 346.05 | 11028      | 1.76       |        |          |              |
| 3 | 342.05 | 105030     | 16.75      |        |          |              | 8 | 382.00 | 40100      | 6.39       |        |          |              |
| 4 | 343.00 | 394560     | 62.91      |        |          |              | 9 | 384.05 | 27033      | 4.31       |        |          |              |
| 5 | 344.05 | 65299      | 10.41      |        |          |              |   |        |            |            |        |          |              |

Figure S45 LCMS spectrum of compound NPD-1186

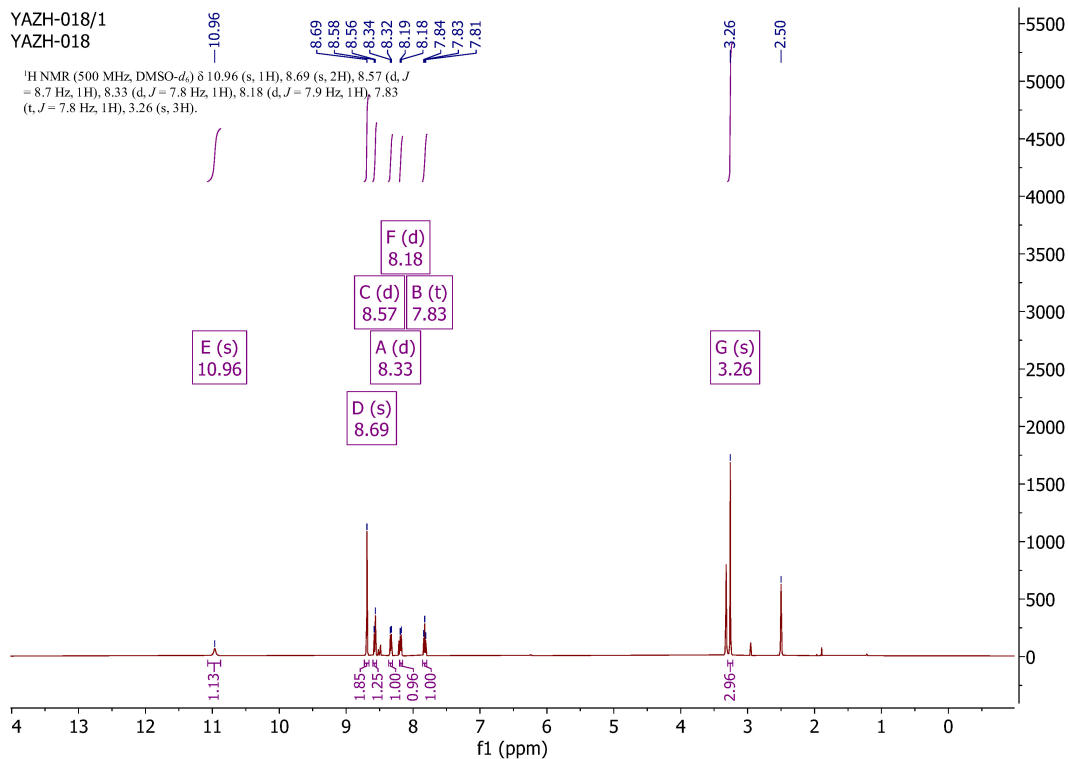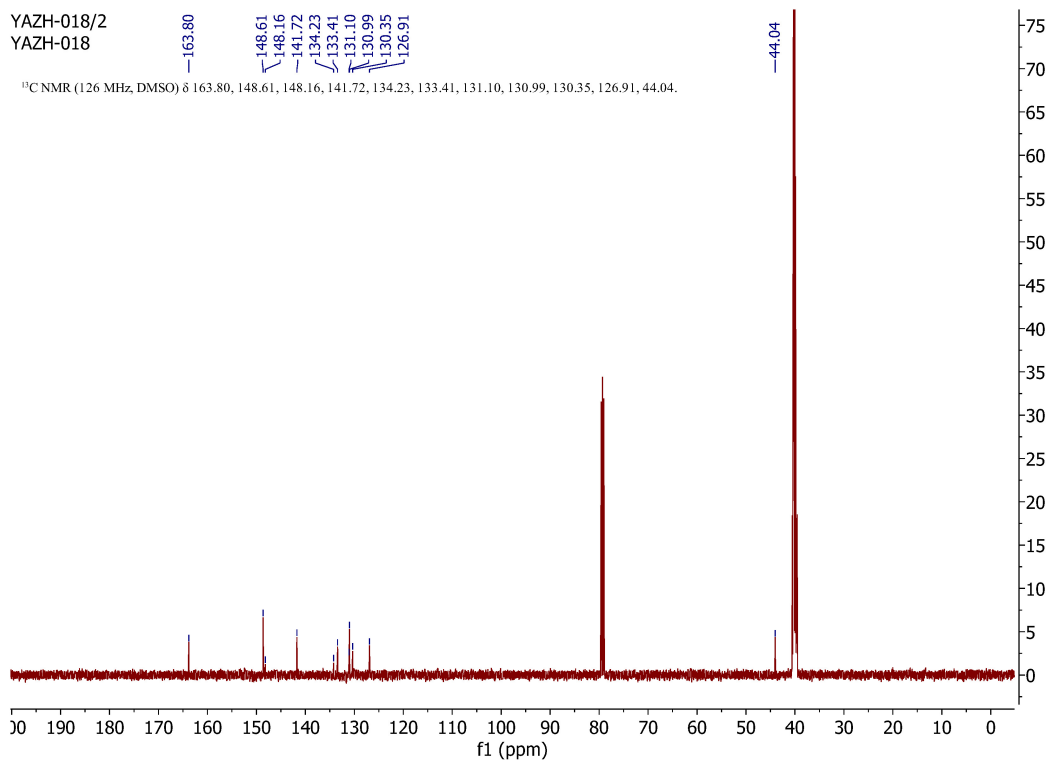



Acquired by : Admin  
 Date Acquired : 10/15/2015 7:24:14 PM  
 Sample Name : YAZH-022  
 Sample ID :  
 Tray# : 1  
 Vial# : 20  
 Injection Volume : 1  
 Data File : C:\LabSolutions\Data\2015\2015-wk42\YAZH-022.lcd  
 Background File : blanco 16102016.lcd  
 Method File : Method SCAN ACID standard.lcm  
 Report Format : Default.LCMS.lcr  
 Tuning File : C:\LabSolutions\Tuning File\Tuning-ESI-pos-neg01072015.lct  
 Processed by : Admin  
 Modified Date : 10/16/2015 9:58:56 AM

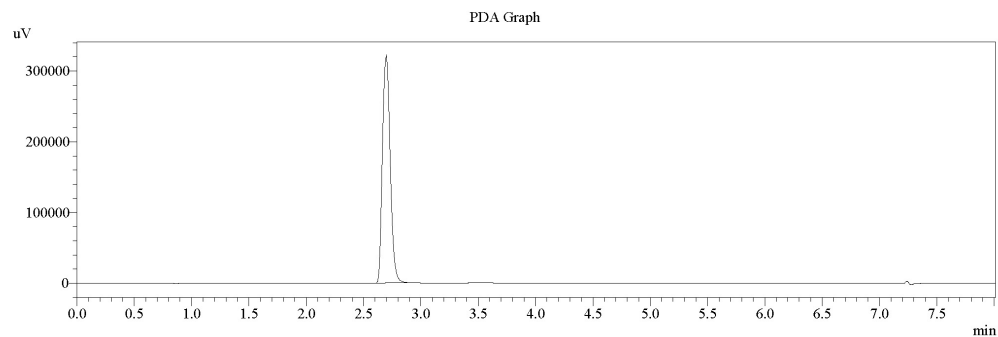

PDA Ch1 254nm 4nm

| Peak# | Name | Ret. Time | Area    | Area %  |
|-------|------|-----------|---------|---------|
| 1     |      | 2.693     | 1518425 | 100.000 |

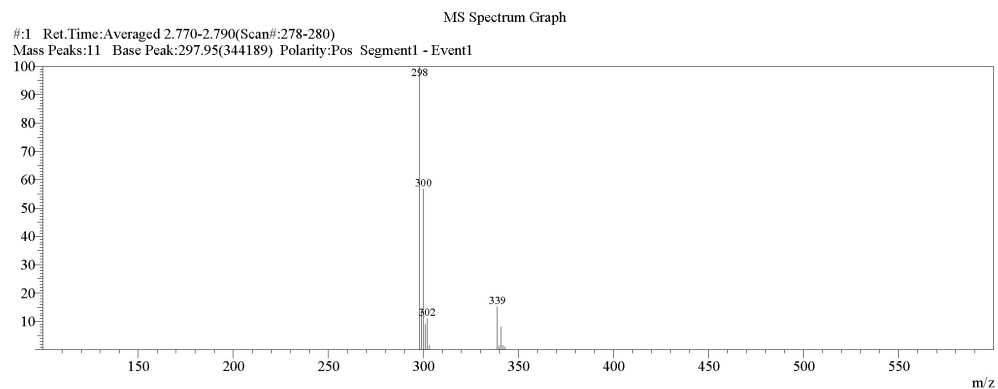

MS Spectrum Table

#1 Ret.Time:  
 BG Mode:Calc 2.640<->3.010(265<->302)

| # | m/z    | Abs.Inten. | Rel.Inten. | Charge | Polarity | Monoisotopic | #  | m/z    | Abs.Inten. | Rel.Inten. | Charge | Polarity | Monoisotopic |
|---|--------|------------|------------|--------|----------|--------------|----|--------|------------|------------|--------|----------|--------------|
| 1 | 297.95 | 344189     | 100.00     |        |          |              | 7  | 338.90 | 52191      | 15.16      |        |          |              |
| 2 | 299.00 | 47397      | 13.77      |        |          |              | 8  | 339.95 | 4878       | 1.42       |        |          |              |
| 3 | 299.95 | 195121     | 56.69      |        |          |              | 9  | 340.95 | 27680      | 8.04       |        |          |              |
| 4 | 300.95 | 30774      | 8.94       |        |          |              | 10 | 341.95 | 5631       | 1.64       |        |          |              |
| 5 | 301.90 | 37966      | 11.03      |        |          |              | 11 | 342.90 | 3658       | 1.06       |        |          |              |
| 6 | 303.05 | 5665       | 1.65       |        |          |              |    |        |            |            |        |          |              |

**Figure S48 LCMS spectrum of compound NPD-1187**

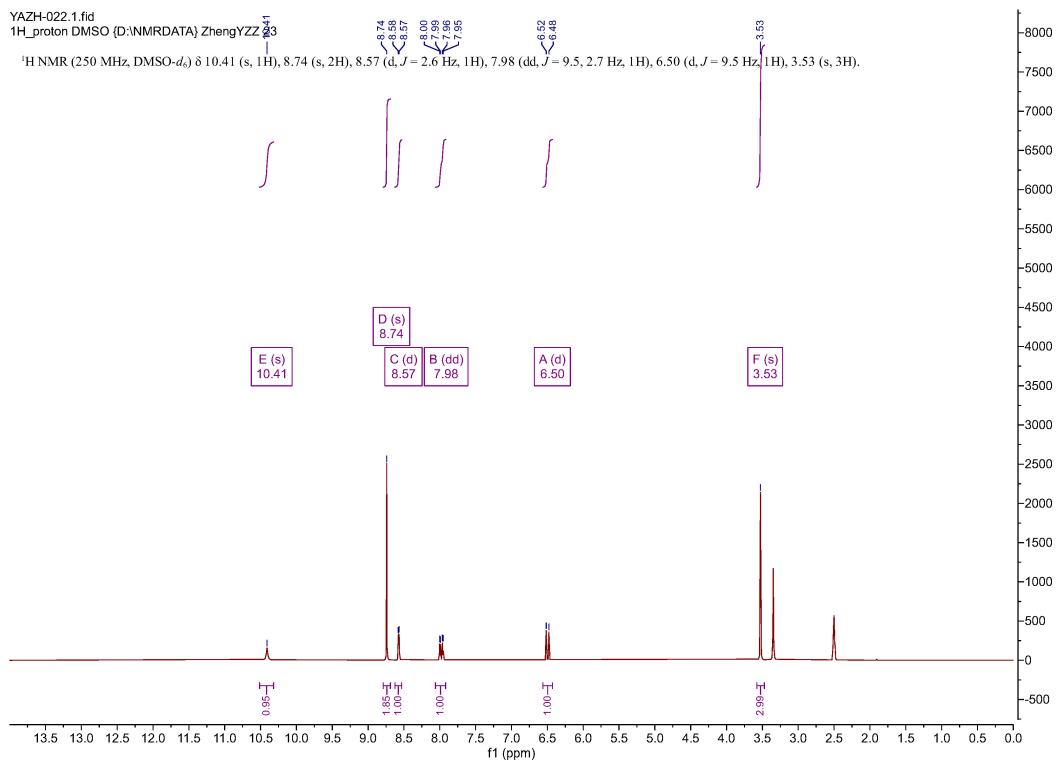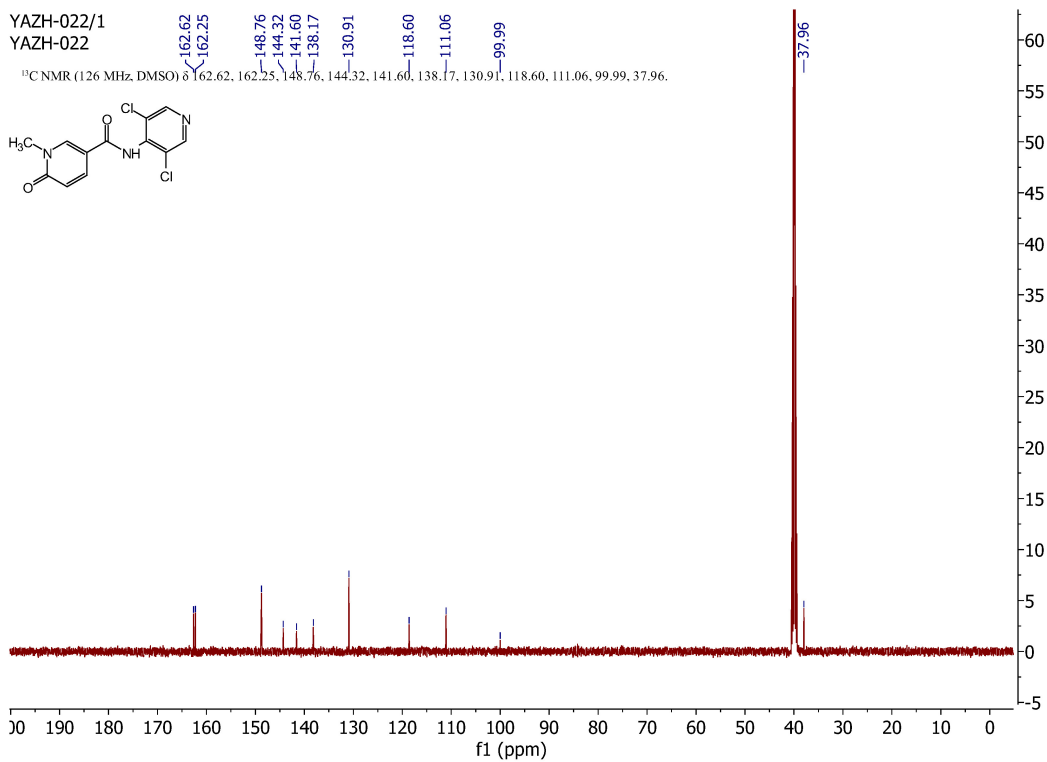

Acquired by : Admin  
 Date Acquired : 10/15/2015 7:32:54 PM  
 Sample Name : YAZH-023  
 Sample ID :  
 Tray# : 1  
 Vial# : 21  
 Injection Volume : 1  
 Data File : C:\LabSolutions\Data\2015\2015-wk42\YAZH-023.lcd  
 Background File : blanco 16102016.lcd  
 Method File : Method SCAN ACID standard.lcm  
 Report Format : DefaultL.CMS.lcr  
 Tuning File : C:\LabSolutions\Tuning File\Tuning-ESI-pos-neg01072015.lct  
 Processed by : Admin  
 Modified Date : 10/16/2015 10:00:42 AM

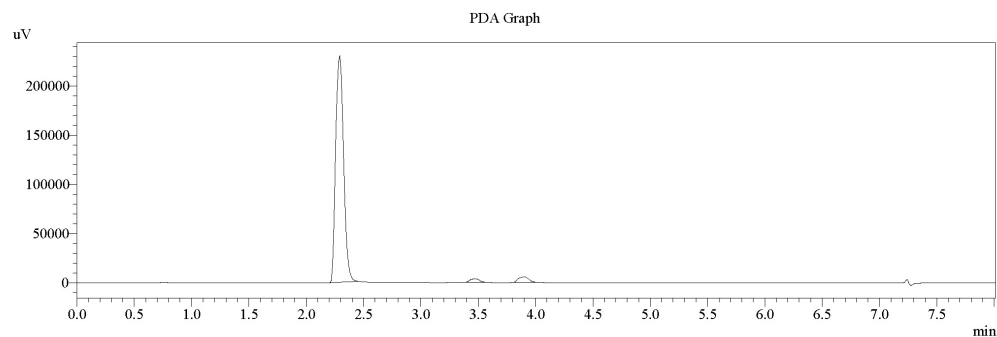

PDA Ch1 254nm 4nm

| Peak# | Name | Ret. Time | Area    | Area % |
|-------|------|-----------|---------|--------|
| 1     |      | 2.286     | 1098596 | 95.233 |
| 2     |      | 3.469     | 19853   | 1.721  |
| 3     |      | 3.897     | 35139   | 3.046  |

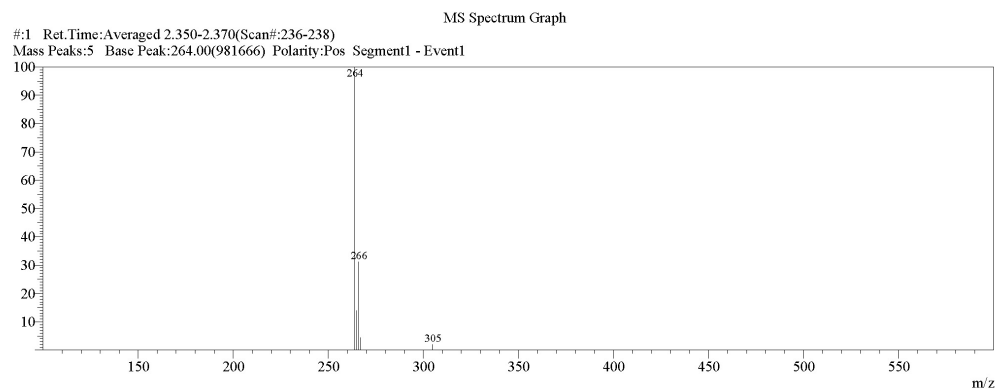

MS Spectrum Table

#1 Ret.Time:  
 BG Mode:Calc 2.230<->2.610(224<->262)  
 Mass Peaks:5 Base Peak:264.00(981666) Polarity:Pos Segment1 - Event

| # | m/z    | Abs.Inten. | Rel.Inten. | Charge | Polarity | Monoisotopic | # | m/z    | Abs.Inten. | Rel.Inten. | Charge | Polarity | Monoisotopic |
|---|--------|------------|------------|--------|----------|--------------|---|--------|------------|------------|--------|----------|--------------|
| 1 | 264.00 | 981666     | 100.00     |        |          |              | 4 | 266.95 | 42805      | 4.36       |        |          |              |
| 2 | 265.00 | 137234     | 13.98      |        |          |              | 5 | 304.95 | 19192      | 1.96       |        |          |              |
| 3 | 266.00 | 305677     | 31.14      |        |          |              |   |        |            |            |        |          |              |

**Figure S51 LCMS spectrum of compound NPD-1188**

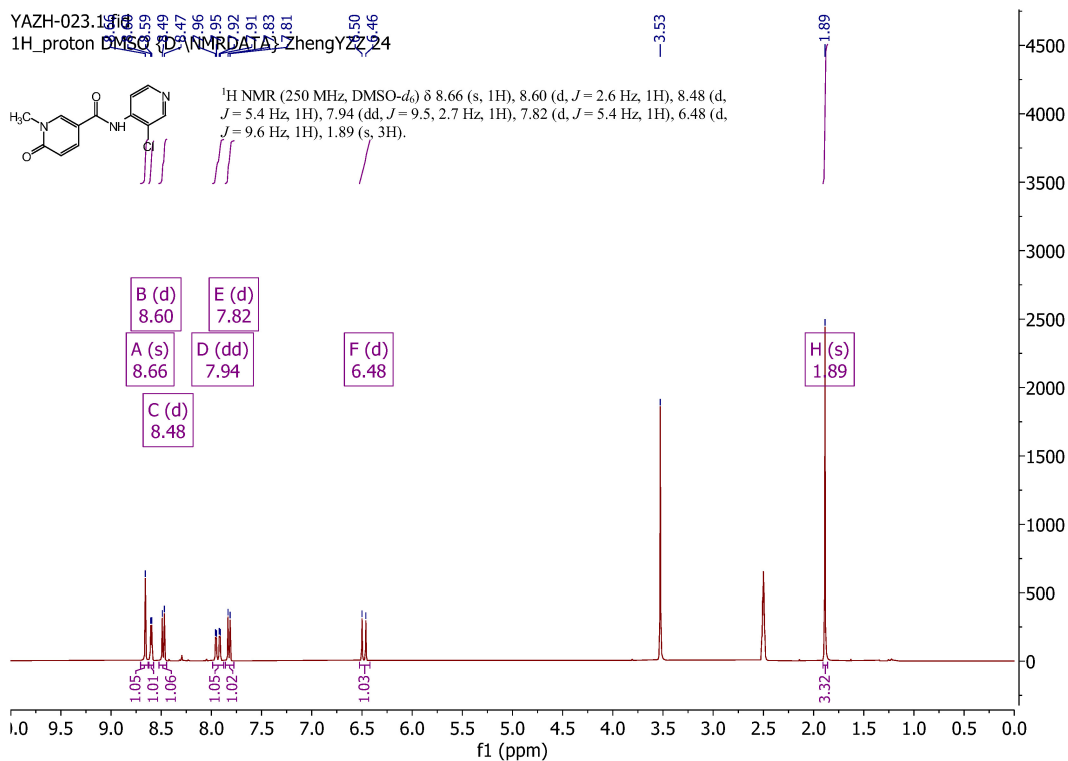

Figure S52 <sup>1</sup>H NMR spectrum of compound NPD-1188

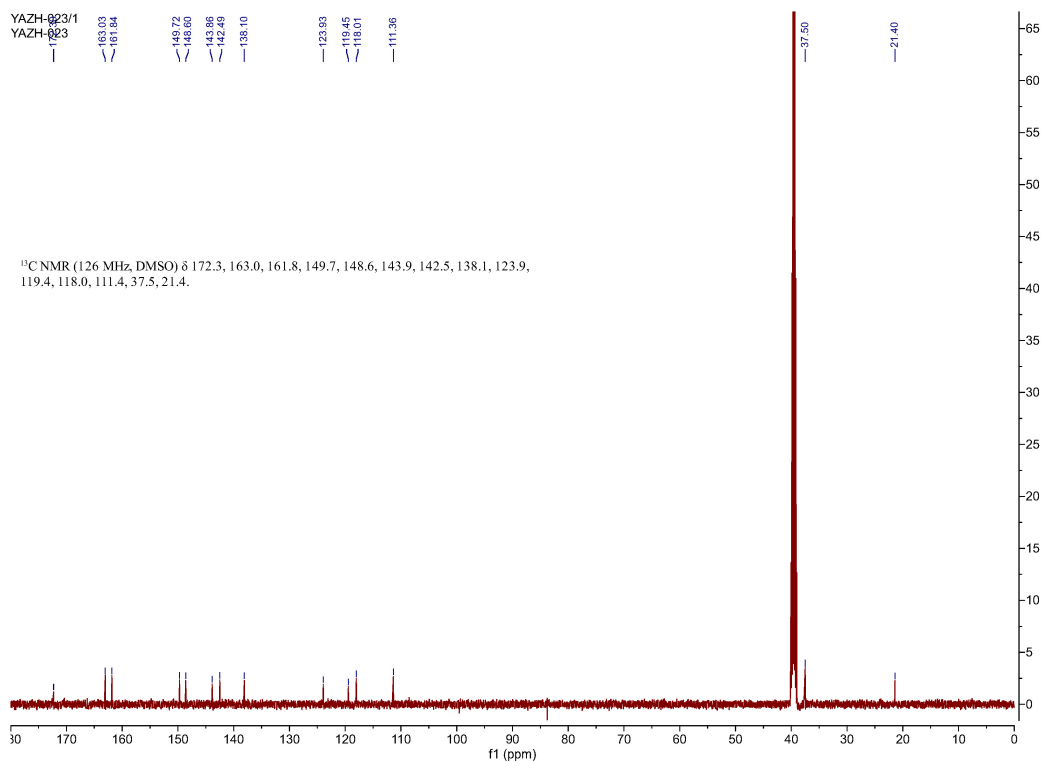

Figure S53 <sup>13</sup>C NMR spectrum of compound NPD-1188

Acquired by : Admin  
 Date Acquired : 10/5/2019 3:43:01 PM  
 Sample Name : YAZH-024  
 Sample ID :  
 Tray# : 1  
 Vial# : 28  
 Injection Volume : 3  
 Data File : C:\LabSolutions\Data\2019\2019-wk19\YAZH-024.lcd  
 Background File : blanco 10052019.lcd  
 Method File : Method SCAN ACID standard.lcm  
 Report Format : DefaultL.CMS.lcr  
 Tuning File : C:\LabSolutions\Tuning\Tuning-ESI-pos-neg01072015a.lct  
 Processed by : Admin  
 Modified Date : 10/5/2019 3:53:03 PM

Medicinal Chemistry  
 Vrije Universiteit Amsterdam

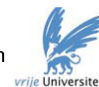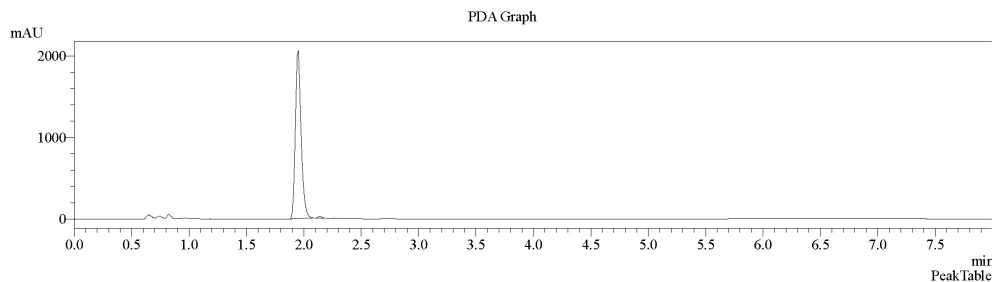

PDA Ch1 254nm 4nm

| Peak# | Name | Ret. Time | Area    | Area % |
|-------|------|-----------|---------|--------|
| 1     |      | 1.943     | 7186373 | 99.251 |
| 2     |      | 2.132     | 54222   | 0.749  |

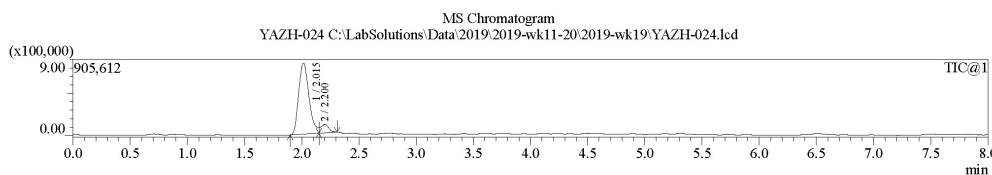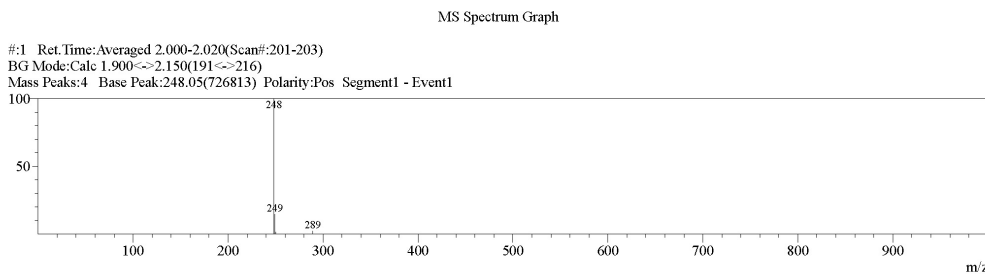

MS Spectrum Table

#1 Ret.Time:  
 BG Mode:Calc 1.900<~2.150(191<~216)  
 Mass Peaks:4 Base Peak:248.05(726813) Polarity:Pos Segment1 - Event1

| # | m/z    | Abs.Inten. | Rel.Inten. | Charge | Polarity | Monoisotopic |
|---|--------|------------|------------|--------|----------|--------------|
| 1 | 248.05 | 726813     | 100.00     |        |          |              |
| 2 | 249.00 | 107663     | 14.81      |        |          |              |
| 3 | 250.05 | 11223      | 1.54       |        |          |              |
| 4 | 289.05 | 17644      | 2.43       |        |          |              |

Figure S54 LCMS spectrum of compound NPD-1189

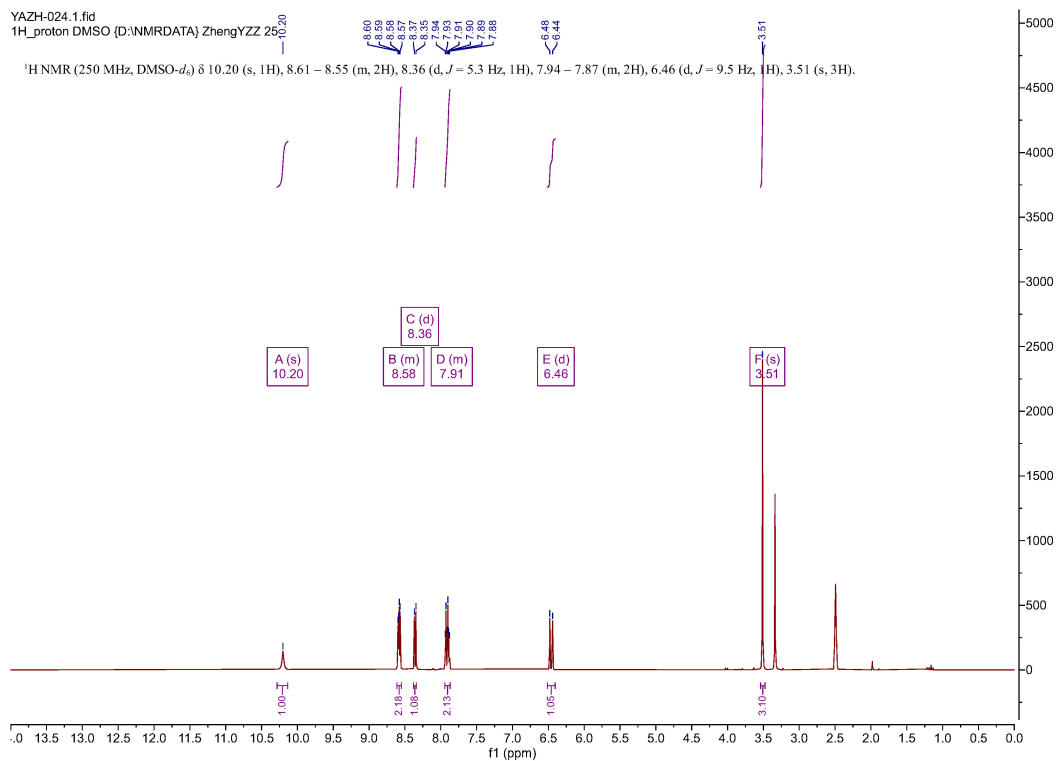

Figure S55 <sup>1</sup>H NMR spectrum of compound NPD-1189

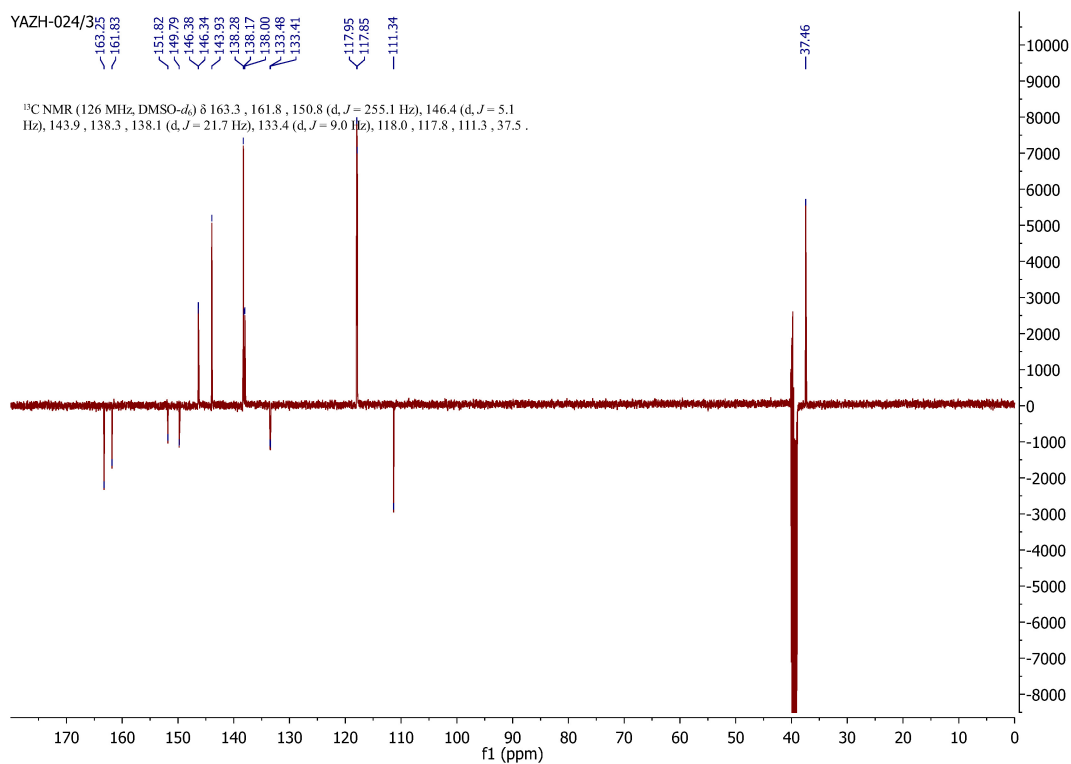

Figure S56 <sup>13</sup>C NMR spectrum of compound NPD-1189

Acquired by : Admin  
Date Acquired : 10/5/2019 4:51:39 PM  
Sample Name : YAZH-029  
Sample ID :  
Tray# : 1  
Vial# : 29  
Injection Volume : 3  
Data File : C:\LabSolutions\Data\2019-wk19\YAZH-029.lcd  
Background File : blanco 10052019.lcd  
Method File : Method SCAN ACID standard.lcm  
Report Format : DefaultL.CMS.lcr  
Tuning File : C:\LabSolutions\Tuning\Tuning-ESI-pos-neg01072015a.lct  
Processed by : Admin  
Modified Date : 10/5/2019 5:00:29 PM

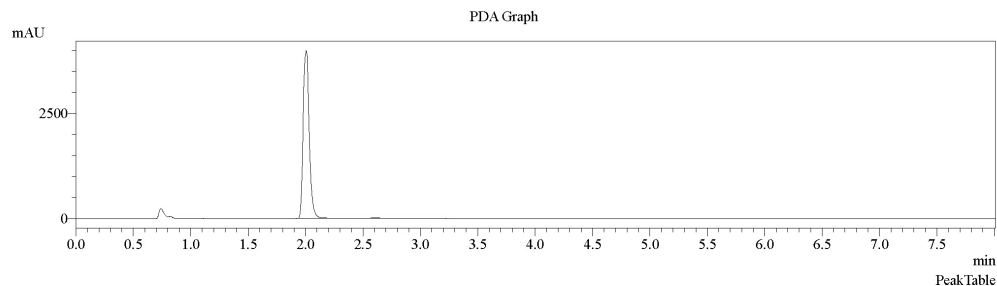

PDA Ch1 254nm 4nm

| Peak# | Name | Ret. Time | Area     | Area % |
|-------|------|-----------|----------|--------|
| 1     |      | 2.001     | 14532492 | 99.441 |
| 2     |      | 2.598     | 81620    | 0.559  |

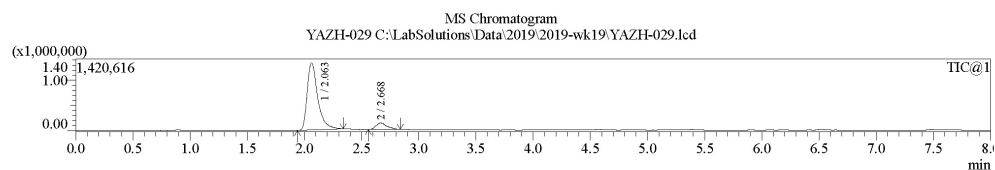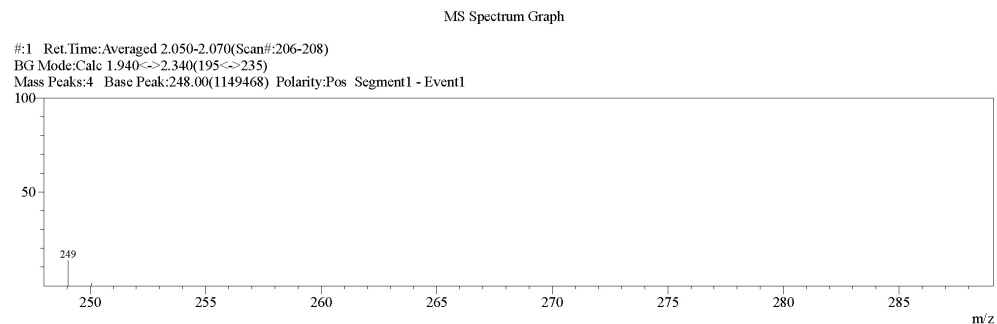

MS Spectrum Table

#1 Ret.Time:  
BG Mode:Calc 1.940<->2.340(195<->235)  
Mass Peaks:4 Base Peak:248.00(1149468) Polarity:Pos Segment1 - Event1

| # | m/z    | Abs.Inten. | Rel.Inten. | Charge | Polarity | Monoisotopic | # | m/z    | Abs.Inten. | Rel.Inten. | Charge | Polarity | Monoisotopic |
|---|--------|------------|------------|--------|----------|--------------|---|--------|------------|------------|--------|----------|--------------|
| 1 | 248.00 | 1149468    | 100.00     |        |          |              | 3 | 250.05 | 16702      | 1.45       |        |          |              |
| 2 | 249.05 | 154747     | 13.46      |        |          |              | 4 | 289.10 | 32360      | 2.82       |        |          |              |

Figure S57 LCMS spectrum of compound NPD-1190

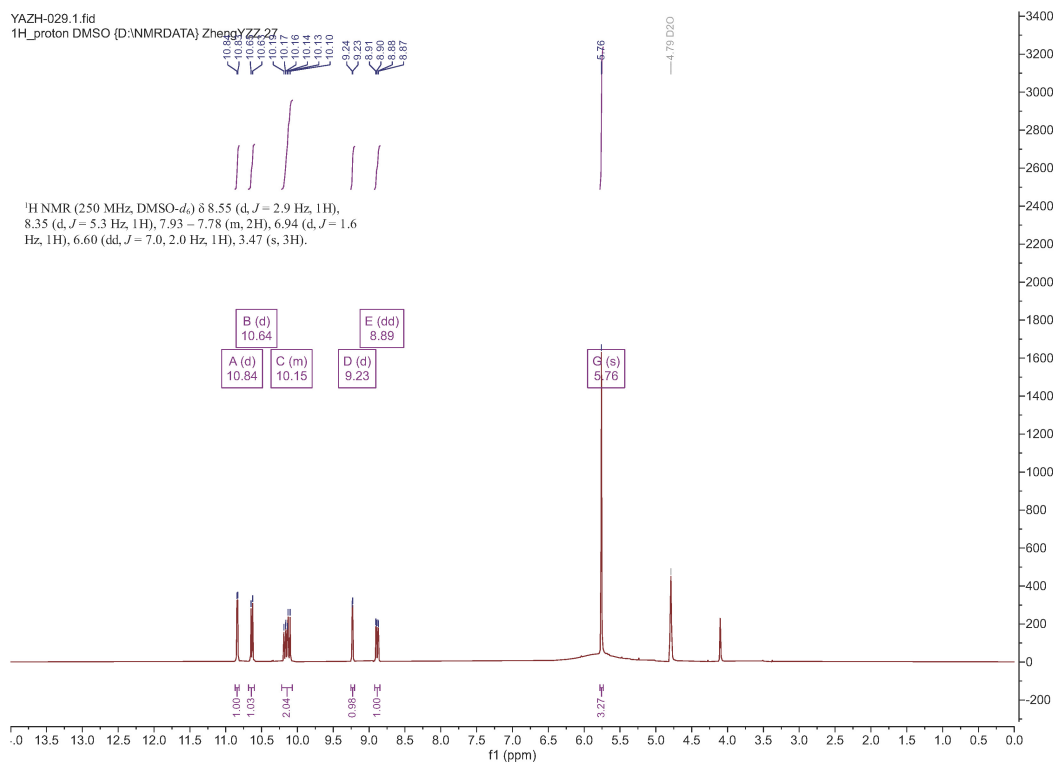

Figure S58 <sup>1</sup>H NMR spectrum of compound NPD-1190

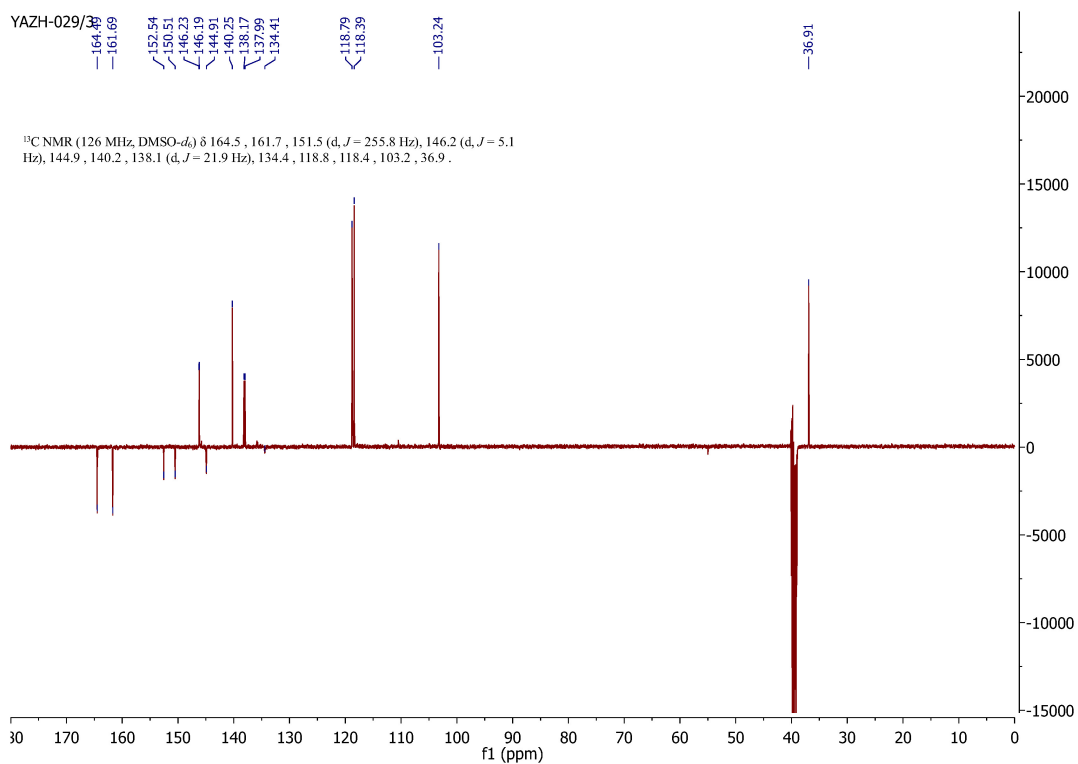

Figure S59 <sup>13</sup>C NMR spectrum of compound NPD-1190



Acquired by : Admin  
 Date Acquired : 10/15/2015 8:42:00 PM  
 Sample Name : YAZH-031  
 Sample ID :  
 Tray# : 1  
 Vial# : 29  
 Injection Volume : 1  
 Data File : C:\LabSolutions\Data\2015\2015-wk42\YAZH-031.lcd  
 Background File : blanco 16102016.lcd  
 Method File : Method SCAN ACID standard.lcm  
 Report Format : Default.LCMS.lcr  
 Tuning File : C:\LabSolutions\Tuning File\Tuning-ESI-pos-neg01072015.lct  
 Processed by : Admin  
 Modified Date : 10/16/2015 10:14:59 AM

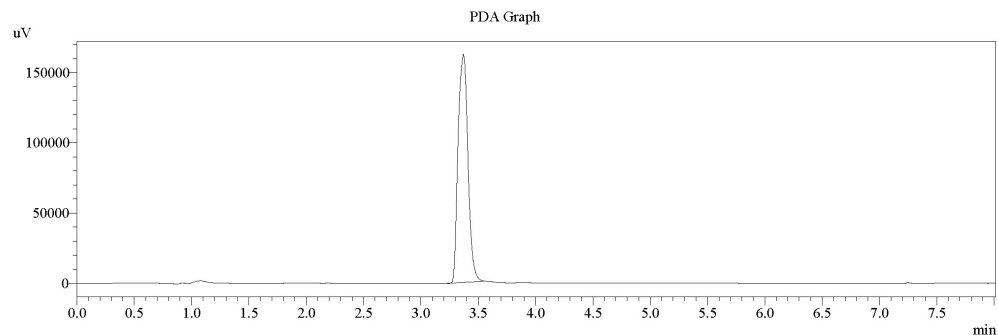

PDA Ch1 254nm 4nm

| Peak# | Name | Ret. Time | Area   | Area %  |
|-------|------|-----------|--------|---------|
| 1     |      | 3.366     | 967925 | 100.000 |

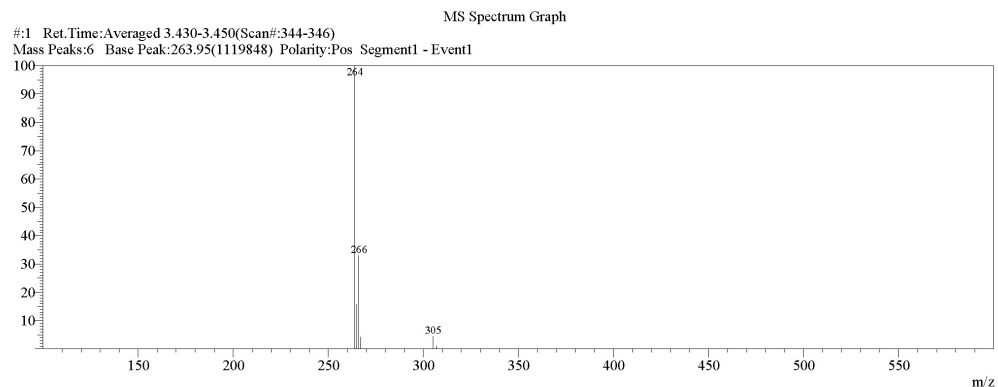

MS Spectrum Table

#1 Ret.Time:  
 BG Mode:Calc 3.290<->3.650(330<->366)

| # | m/z    | Abs.Inten. | Rel.Inten. | Charge | Polarity | Monoisotopic |
|---|--------|------------|------------|--------|----------|--------------|
| 1 | 263.95 | 1119848    | 100.00     |        |          |              |
| 2 | 265.00 | 175976     | 15.71      |        |          |              |
| 3 | 266.00 | 368548     | 32.91      |        |          |              |
| 4 | 267.05 | 47817      | 4.27       |        |          |              |
| 5 | 305.05 | 50223      | 4.48       |        |          |              |
| 6 | 306.95 | 11456      | 1.02       |        |          |              |

**Figure S60 LCMS spectrum of compound NPD-1191**

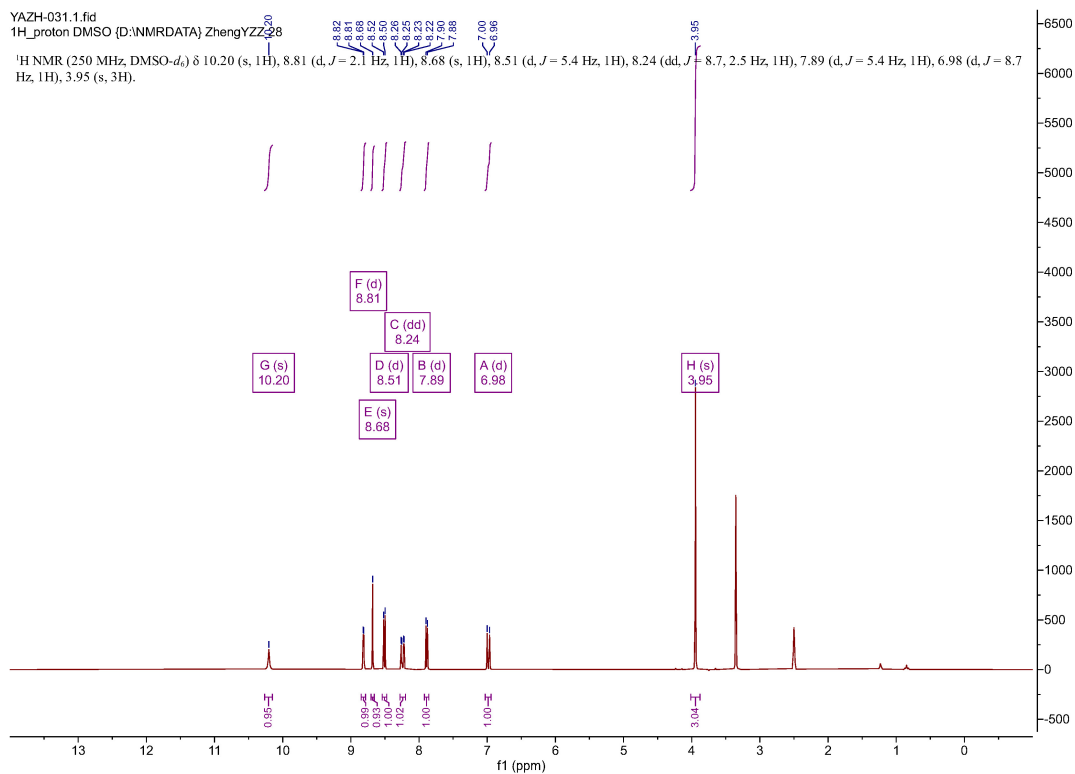

Figure S61 <sup>1</sup>H NMR spectrum of compound NPD-1191

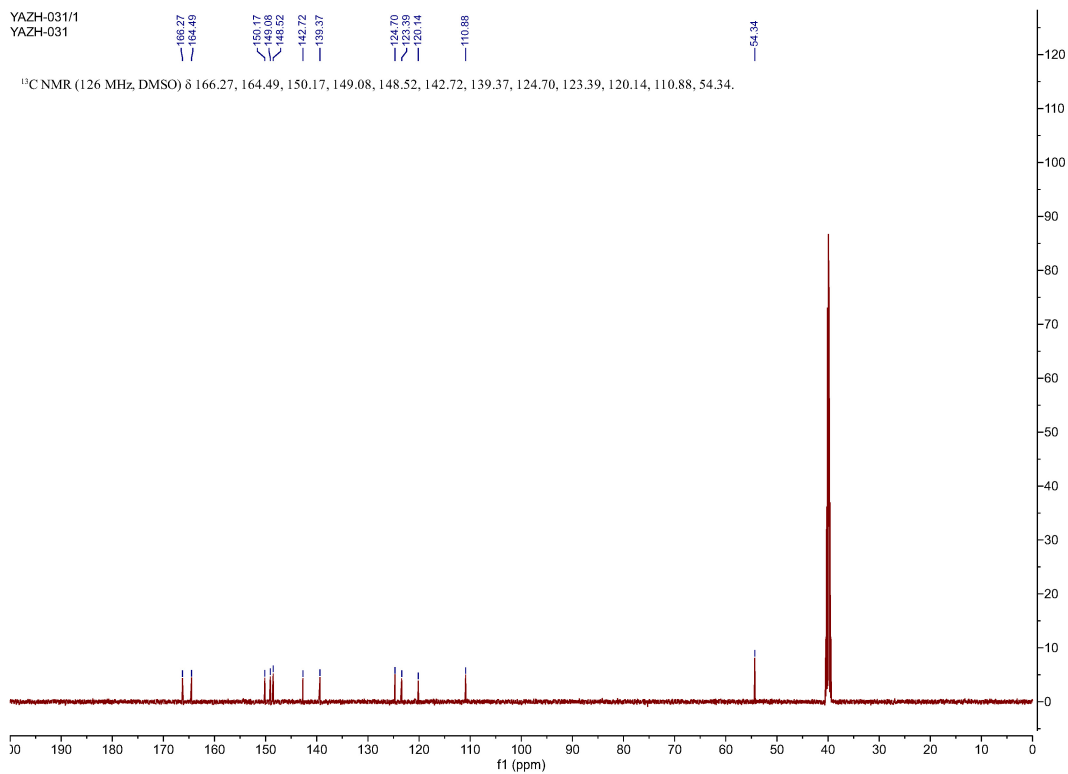

Figure S62 <sup>13</sup>C NMR spectrum of compound NPD-1191

Acquired by : Admin  
 Date Acquired : 10/15/2015 9:16:40 PM  
 Sample Name : YAZH-035  
 Sample ID :  
 Tray# : 1  
 Vial# : 33  
 Injection Volume : 1  
 Data File : C:\LabSolutions\Data\2015\2015-wk42\YAZH-035.lcd  
 Background File : blanco 16102016.lcd  
 Method File : Method SCAN ACID standard.lcm  
 Report Format : DefaultL.CMS.lcr  
 Tuning File : C:\LabSolutions\Tuning File\Tuning-ESI-pos-neg01072015.lct  
 Processed by : Admin  
 Modified Date : 10/16/2015 10:26:32 AM

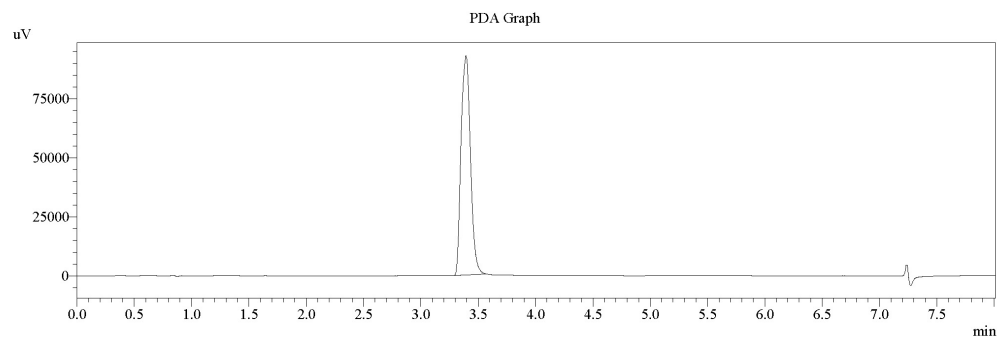

PDA Ch1 254nm 4nm

| Peak# | Name | Ret. Time | Area   | Area %  |
|-------|------|-----------|--------|---------|
| 1     |      | 3.388     | 529345 | 100.000 |

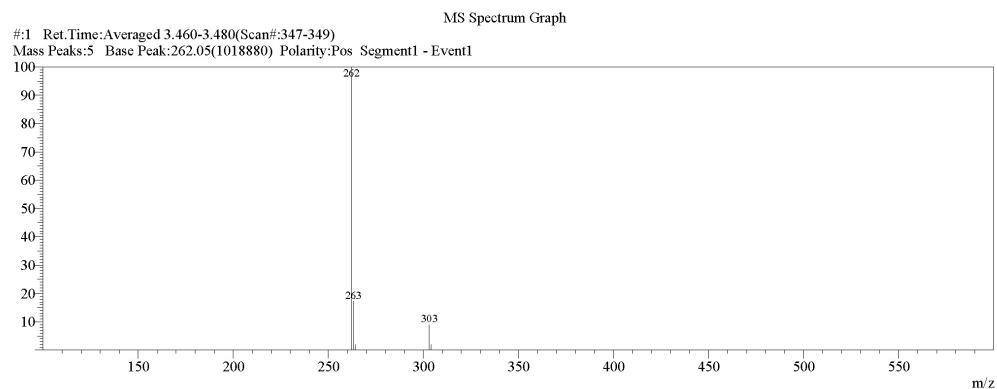

MS Spectrum Table

#1 Ret.Time:  
BG Mode:Calc 3.330<->3.700(334<->371)

Mass Peaks:5 Base Peak:262.05(1018880) Polarity:Pos Segment1 - Event

| # | m/z    | Abs.Inten. | Rel.Inten. | Charge | Polarity | Monoisotopic | # | m/z    | Abs.Inten. | Rel.Inten. | Charge | Polarity | Monoisotopic |
|---|--------|------------|------------|--------|----------|--------------|---|--------|------------|------------|--------|----------|--------------|
| 1 | 262.05 | 1018880    | 100.00     |        |          |              | 4 | 303.05 | 91380      | 8.97       |        |          |              |
| 2 | 263.05 | 175193     | 17.19      |        |          |              | 5 | 304.05 | 20228      | 1.99       |        |          |              |
| 3 | 264.05 | 20439      | 2.01       |        |          |              |   |        |            |            |        |          |              |

**Figure S63 LCMS spectrum of compound NPD-1192**



Acquired by : Admin  
 Date Acquired : 10/15/2015 9:25:18 PM  
 Sample Name : YAZH-036  
 Sample ID :  
 Tray# : 1  
 Vial# : 34  
 Injection Volume : 1  
 Data File : C:\LabSolutions\Data\2015\2015-wk42\YAZH-036.lcd  
 Background File : blanco 16102016.lcd  
 Method File : Method SCAN ACID standard.lcm  
 Report Format : DefaultL.CMS.lcr  
 Tuning File : C:\LabSolutions\Tuning File\Tuning-ESI-pos-neg01072015.lct  
 Processed by : Admin  
 Modified Date : 10/19/2015 9:03:28 AM

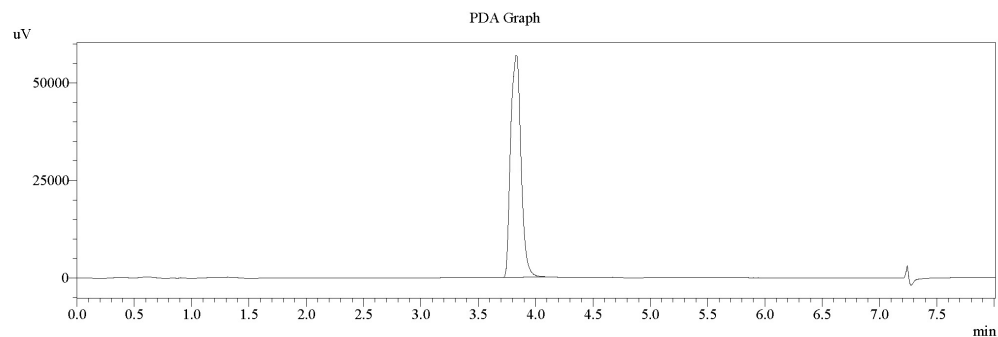

PDA Ch1 254nm 4nm

| Peak# | Name | Ret. Time | Area   | Area %  |
|-------|------|-----------|--------|---------|
| 1     |      | 3.828     | 358888 | 100.000 |

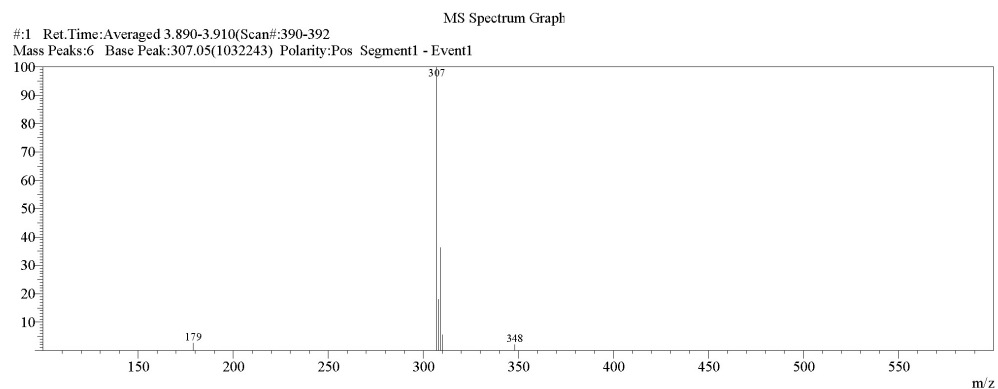

MS Spectrum Table

#1 Ret.Time:  
 BG Mode:Calc 3.750<->4.170(376<->418)  
 Mass Peaks:6 Base Peak:307.05(1032243) Polarity:Pos Segment1 - Event

| # | m/z    | Abs.Inten. | Rel.Inten. | Charge | Polarity | Monoisotopic | # | m/z    | Abs.Inten. | Rel.Inten. | Charge | Polarity | Monoisotopic |
|---|--------|------------|------------|--------|----------|--------------|---|--------|------------|------------|--------|----------|--------------|
| 1 | 179.00 | 27516      | 2.67       |        |          |              | 4 | 309.00 | 375372     | 36.36      |        |          |              |
| 2 | 307.05 | 1032243    | 100.00     |        |          |              | 5 | 310.05 | 56840      | 5.51       |        |          |              |
| 3 | 308.05 | 187211     | 18.14      |        |          |              | 6 | 348.10 | 21337      | 2.07       |        |          |              |

**Figure S66 LCMS spectrum of compound NPD-1193**

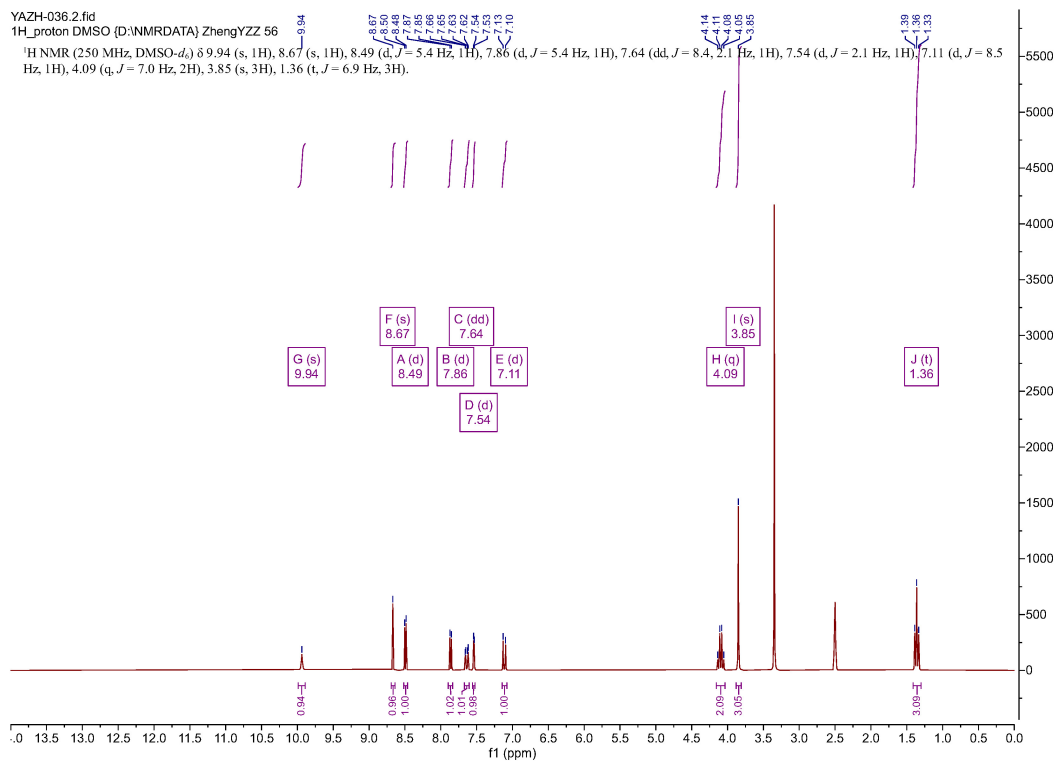

Figure S67 <sup>1</sup>H NMR spectrum of compound NPD-1193

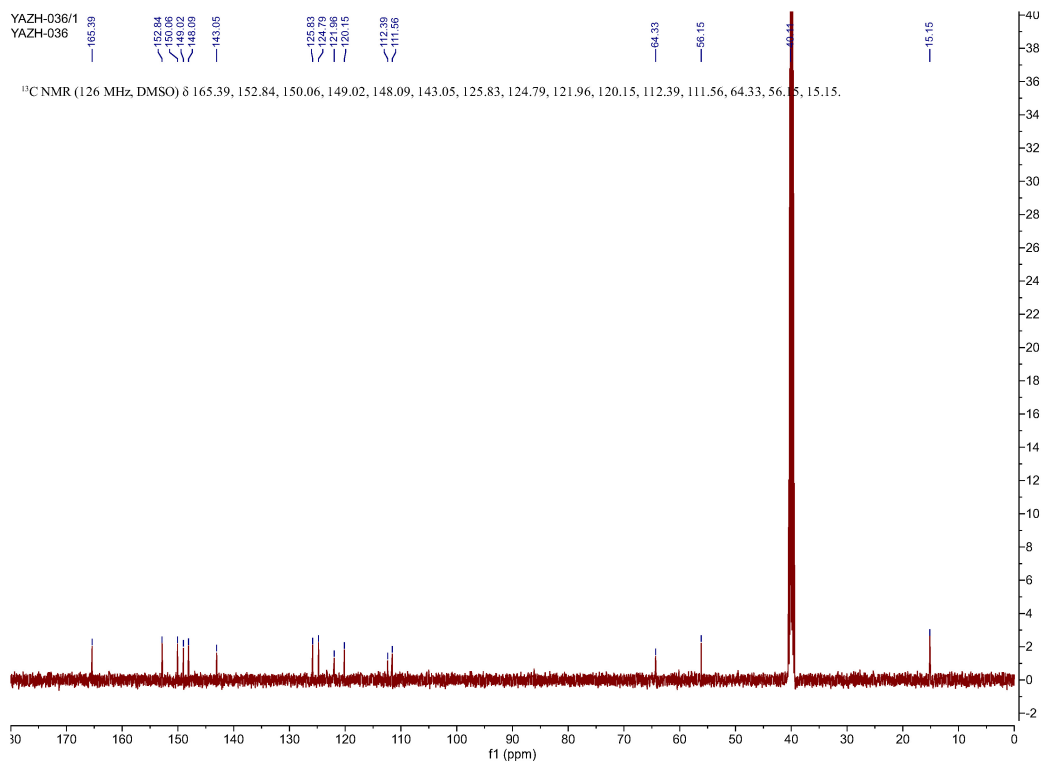

Figure S68 <sup>13</sup>C NMR spectrum of compound NPD-1193

Acquired by : Admin  
 Date Acquired : 10/16/2015 12:26:39 AM  
 Sample Name : YAZH-057  
 Sample ID :  
 Tray# : 1  
 Vial# : 55  
 Injection Volume : 1  
 Data File : C:\LabSolutions\Data\2015\2015-wk42\YAZH-057.lcd  
 Background File : blanco 16102016.lcd  
 Method File : Method SCAN ACID standard.lcm  
 Report Format : DefaultL.CMS.lcr  
 Tuning File : C:\LabSolutions\Tuning File\Tuning-ESI-pos-neg01072015.lct  
 Processed by : Admin  
 Modified Date : 10/16/2015 11:57:34 AM

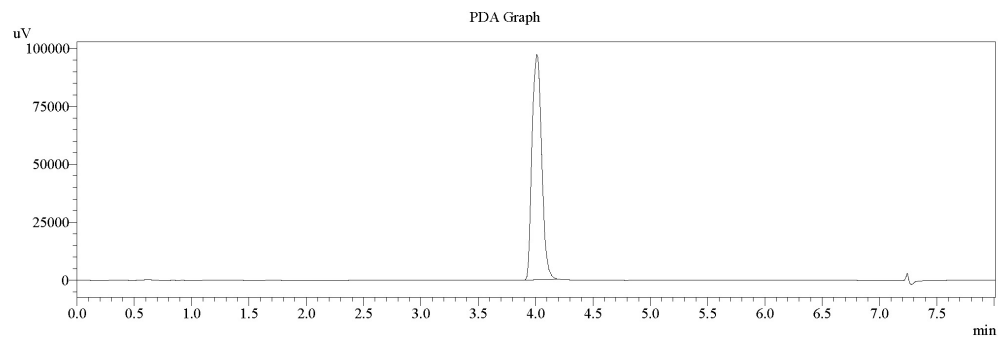

PDA Ch1 254nm 4nm

| Peak# | Name | Ret. Time | Area   | Area %  |
|-------|------|-----------|--------|---------|
| 1     |      | 4.008     | 570367 | 100.000 |

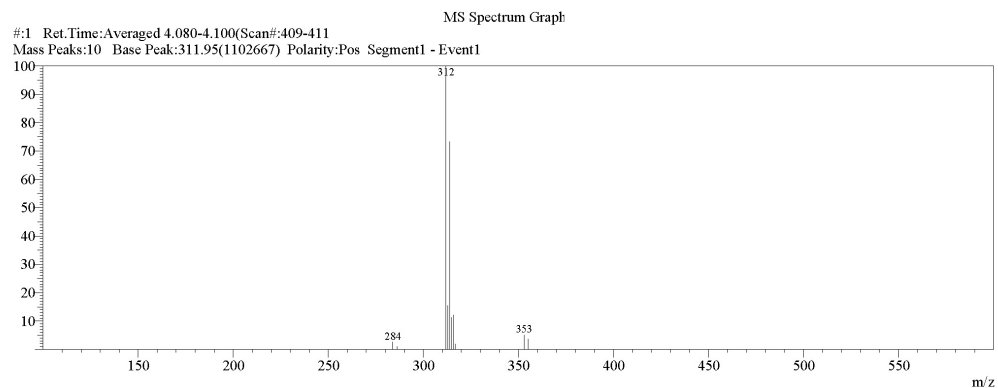

MS Spectrum Table

#1 Ret.Time:  
 BG Mode:Calc 3.940<=>4.290(395<=>430)

| # | m/z    | Abs.Inten. | Rel.Inten. | Charge | Polarity | Monoisotopic | #  | m/z    | Abs.Inten. | Rel.Inten. | Charge | Polarity | Monoisotopic |
|---|--------|------------|------------|--------|----------|--------------|----|--------|------------|------------|--------|----------|--------------|
| 1 | 284.00 | 27661      | 2.51       |        |          |              | 6  | 315.00 | 124002     | 11.25      |        |          |              |
| 2 | 286.10 | 11507      | 1.04       |        |          |              | 7  | 316.00 | 133888     | 12.14      |        |          |              |
| 3 | 311.95 | 1102667    | 100.00     |        |          |              | 8  | 316.90 | 20365      | 1.85       |        |          |              |
| 4 | 313.00 | 169450     | 15.37      |        |          |              | 9  | 353.00 | 55551      | 5.04       |        |          |              |
| 5 | 314.00 | 808420     | 73.31      |        |          |              | 10 | 355.05 | 39760      | 3.61       |        |          |              |

Figure S69 LCMS spectrum of compound NPD-1194

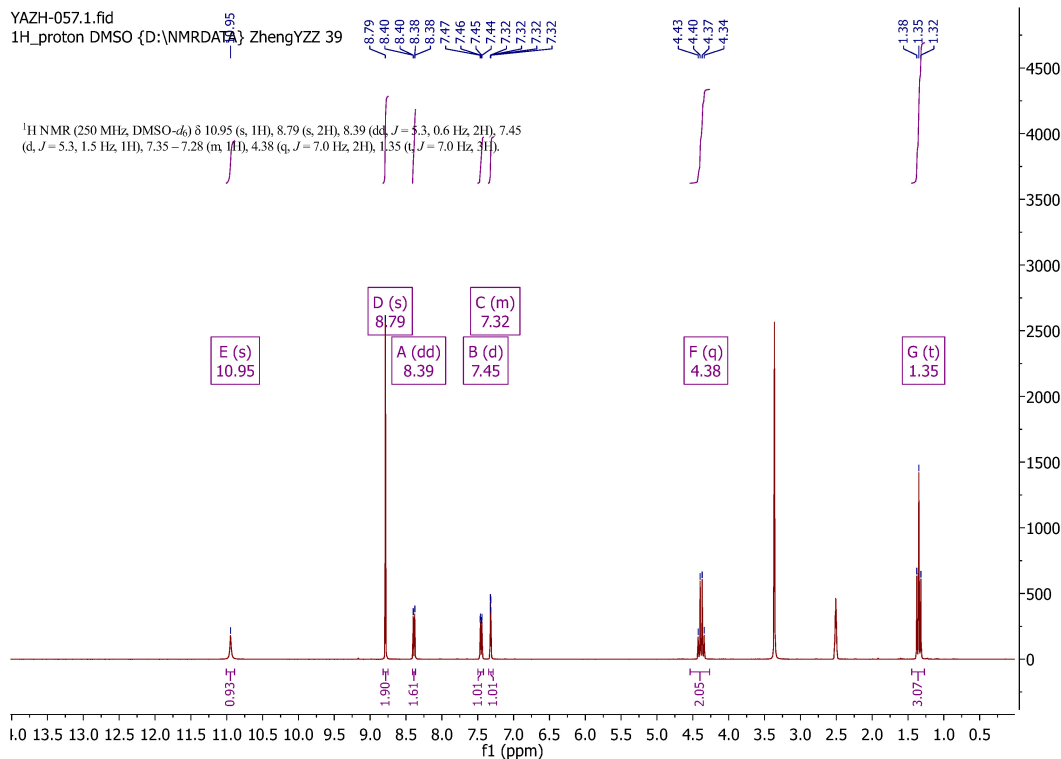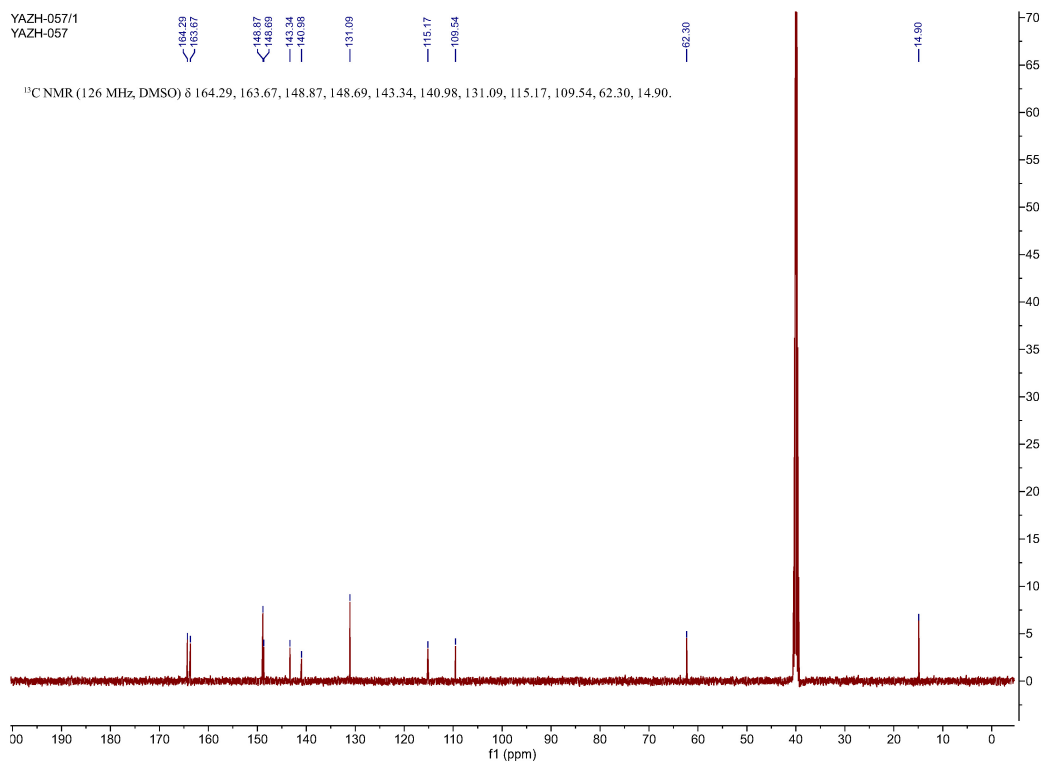



Acquired by : Admin  
 Date Acquired : 10/16/2015 1:53:00 AM  
 Sample Name : YAZH-067  
 Sample ID :  
 Tray# : 1  
 Vial# : 65  
 Injection Volume : 1  
 Data File : C:\LabSolutions\Data\2015\2015-wk42\YAZH-067.lcd  
 Background File : blanco 16102016.lcd  
 Method File : Method SCAN ACID standard.lcm  
 Report Format : DefaultL.CMS.lcr  
 Tuning File : C:\LabSolutions\Tuning File\Tuning-ESI-pos-neg01072015.lct  
 Processed by : Admin  
 Modified Date : 10/16/2015 12:10:12 PM

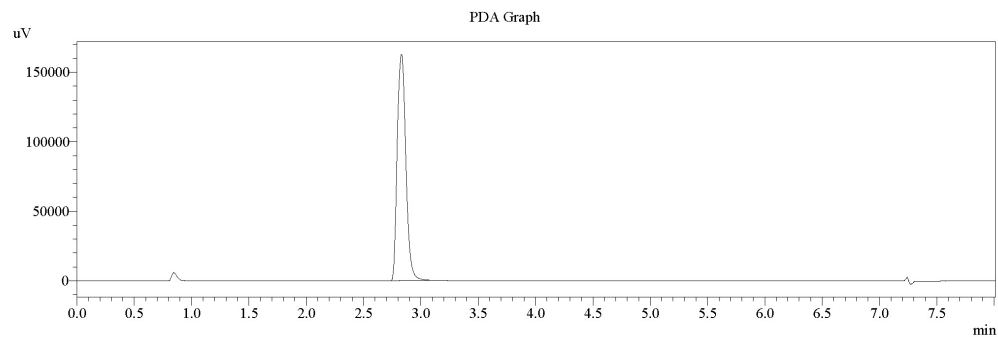

PDA Ch1 254nm 4nm

| Peak# | Name | Ret. Time | Area   | Area %  |
|-------|------|-----------|--------|---------|
| 1     |      | 2.826     | 851963 | 100.000 |

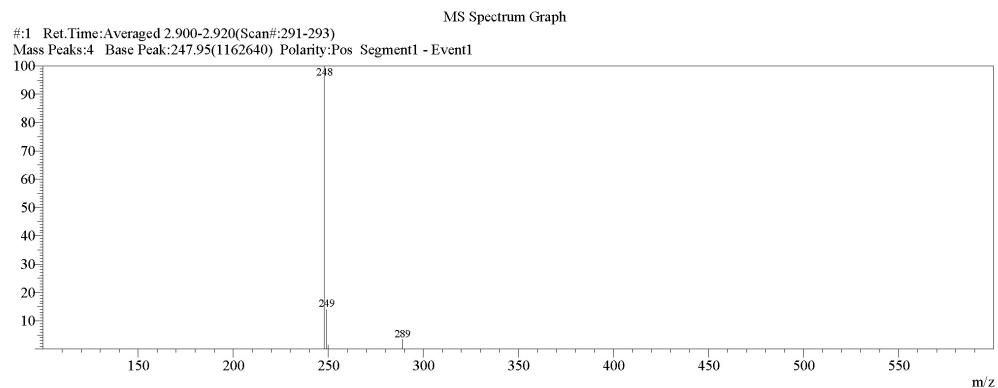

MS Spectrum Table

#1 Ret.Time:  
 BG Mode:Calc 2.770<->3.100(278<->311)

| # | m/z    | Abs.Inten. | Rel.Inten. | Charge | Polarity | Monoisotopic |
|---|--------|------------|------------|--------|----------|--------------|
| 1 | 247.95 | 1162640    | 100.00     |        |          |              |
| 2 | 249.05 | 162346     | 13.96      |        |          |              |

  

| # | m/z    | Abs.Inten. | Rel.Inten. | Charge | Polarity | Monoisotopic |
|---|--------|------------|------------|--------|----------|--------------|
| 3 | 249.95 | 17045      | 1.47       |        |          |              |
| 4 | 288.95 | 38528      | 3.31       |        |          |              |

**Figure S72 LCMS spectrum of compound NPD-1195**

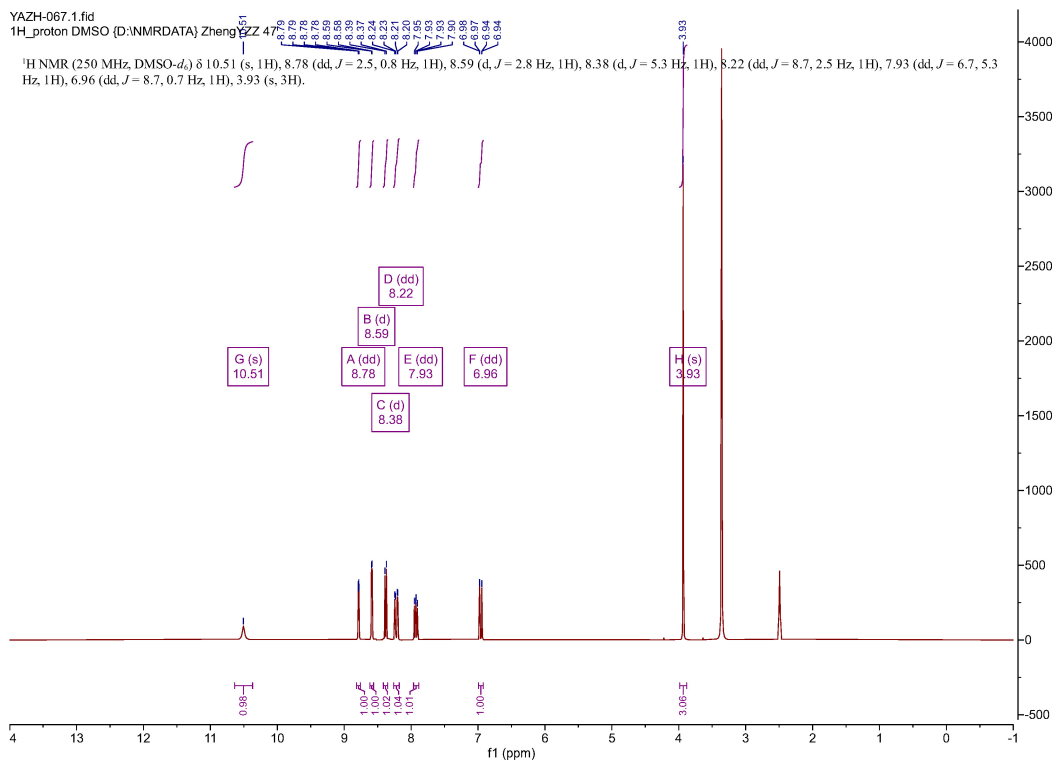

Figure S73 <sup>1</sup>H NMR spectrum of compound NPD-1195

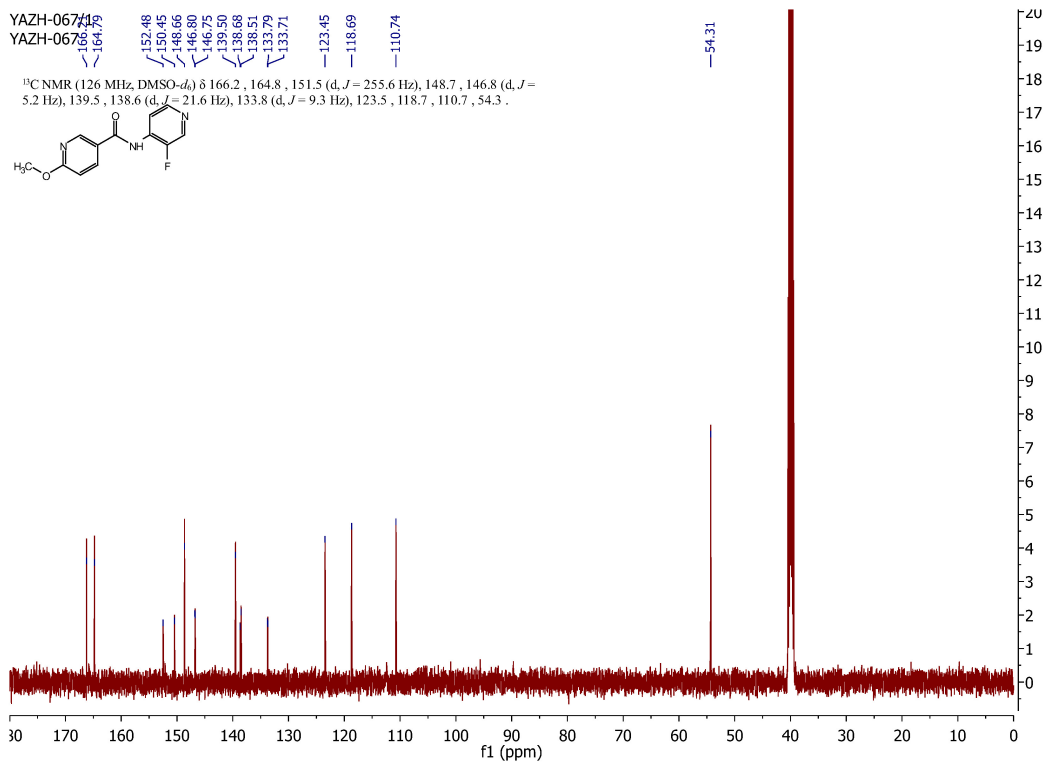

Figure S74 <sup>13</sup>C NMR spectrum of compound NPD-1195

Acquired by : Admin  
 Date Acquired : 1/26/2016 6:32:01 PM  
 Sample Name : Arien compound 68  
 Sample ID :  
 Tray# : 1  
 Vial# : 15  
 Injection Volume : 1  
 Data File : C:\LabSolutions\Methods\FAR Pract Arien compound 68.lcd  
 Background File : Blanco-2 26012016.lcd  
 Method File : Method SCAN ACID standard.lcm  
 Report Format : DefaultL.CMS.lcr  
 Tuning File : C:\LabSolutions\Tuning File\Tuning-ESI-pos-neg01072015.lct  
 Processed by : Admin  
 Modified Date : 1/27/2016 9:25:55 AM

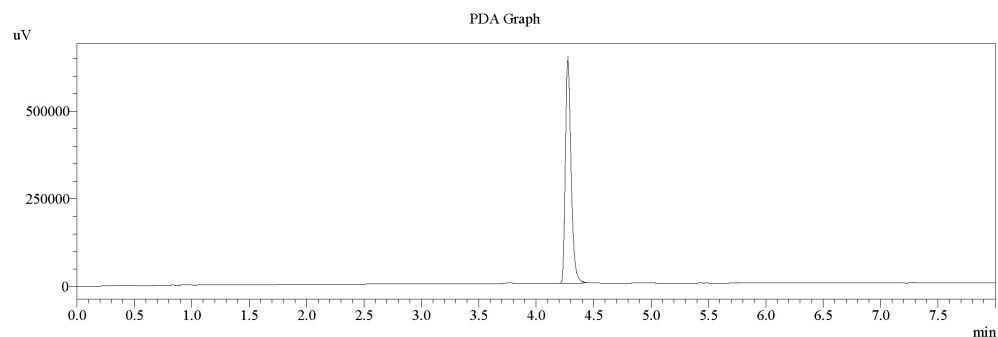

PDA Ch1 254nm 4nm

| Peak# | Name | Ret. Time | Area    | Area %  |
|-------|------|-----------|---------|---------|
| 1     |      | 4.271     | 2209356 | 100.000 |

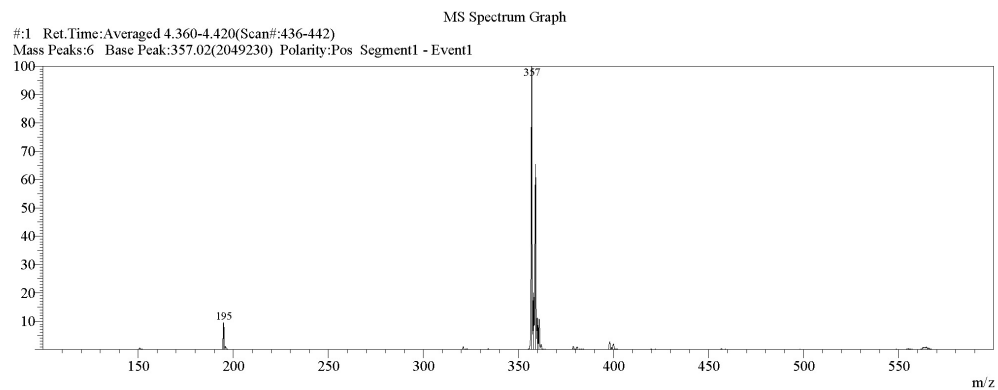

MS Spectrum Table

#1 Ret.Time:  
 BG Mode:None  
 Mass Peaks:6 Base Peak:357.02(2015727) Polarity:Pos Segment1 - Event

| # | m/z    | Abs.Inten. | Rel.Inten. | Charge | Polarity | Monoisotopic | # | m/z    | Abs.Inten. | Rel.Inten. | Charge | Polarity | Monoisotopic |
|---|--------|------------|------------|--------|----------|--------------|---|--------|------------|------------|--------|----------|--------------|
| 1 | 194.94 | 182373     | 9.05       |        |          |              | 4 | 359.01 | 1331645    | 66.06      |        |          |              |
| 2 | 357.02 | 2015727    | 100.00     |        |          |              | 5 | 359.94 | 226471     | 11.24      |        |          |              |
| 3 | 358.01 | 398416     | 19.77      |        |          |              | 6 | 360.94 | 214688     | 10.65      |        |          |              |

**Figure S75 LCMS spectrum of compound NPD-1196**

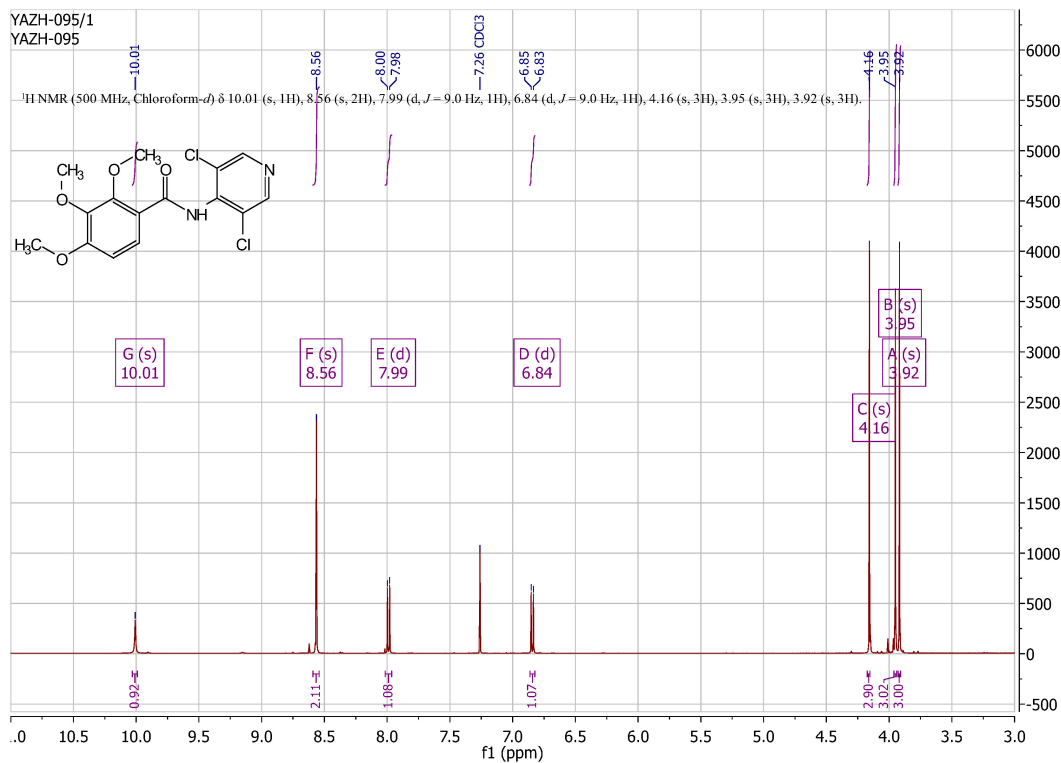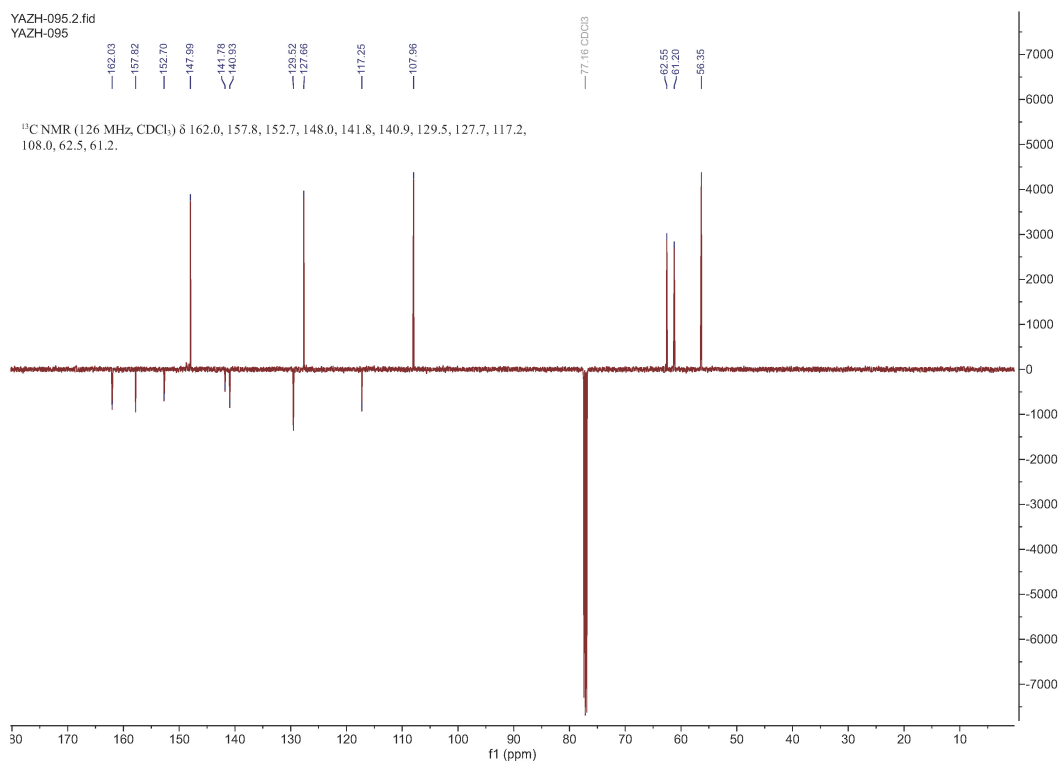

Acquired by : Admin  
Date Acquired : 13/5/2019 9:34:56 AM  
Sample Name : VUF15577  
Sample ID :  
Tray# : 1  
Vial# : 3  
Injection Volume : 3  
Data File : C:\LabSolutions\Data\2019\wk20\VUF15577.lcd  
Background File : blanco 13052019.lcd  
Method File : Method SCAN ACID standard.lcm  
Report Format : DefaultLCMS.lcr  
Tuning File : C:\LabSolutions\Tuning\Tuning-ESI-pos-neg01072015a1ct  
Processed by : Admin  
Modified Date : 13/5/2019 10:57:10 AM

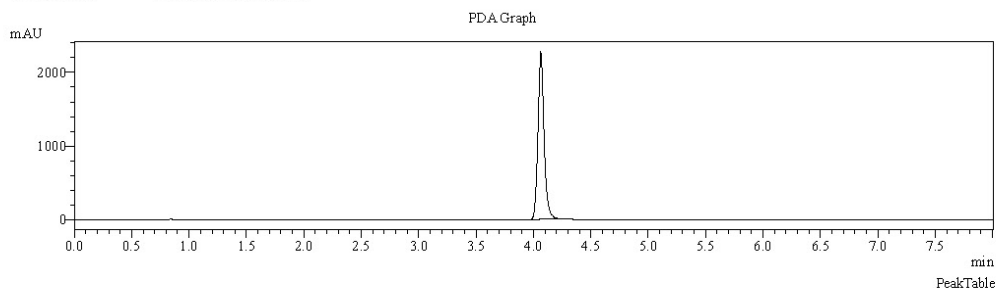

| Peak# | Name | Ret. Time | Area    | Area %  |
|-------|------|-----------|---------|---------|
| 1     |      | 4.059     | 8301793 | 100.000 |

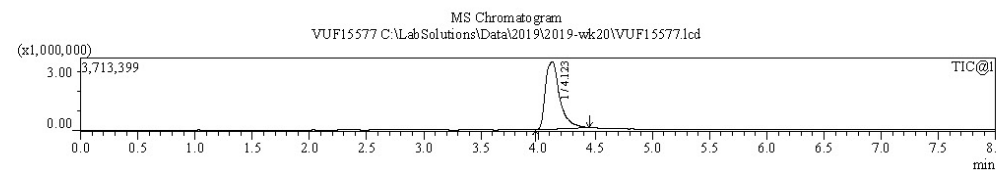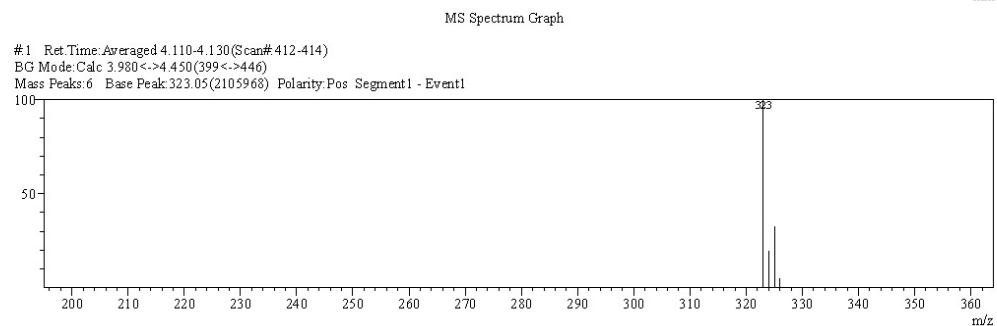

MS Spectrum Table

| # | m/z    | Abs.Inten. | Rel.Inten. | Charge | Polarity | Monoisotopic |
|---|--------|------------|------------|--------|----------|--------------|
| 1 | 195.00 | 68515      | 3.25       |        |          |              |
| 2 | 323.05 | 2105968    | 100.00     |        |          |              |
| 3 | 324.05 | 412686     | 19.60      |        |          |              |
| 4 | 325.05 | 682617     | 32.41      |        |          |              |
| 5 | 326.05 | 104359     | 4.96       |        |          |              |
| 6 | 364.05 | 58990      | 2.80       |        |          |              |

Figure S78 LCMS spectrum of compound NPD-1197

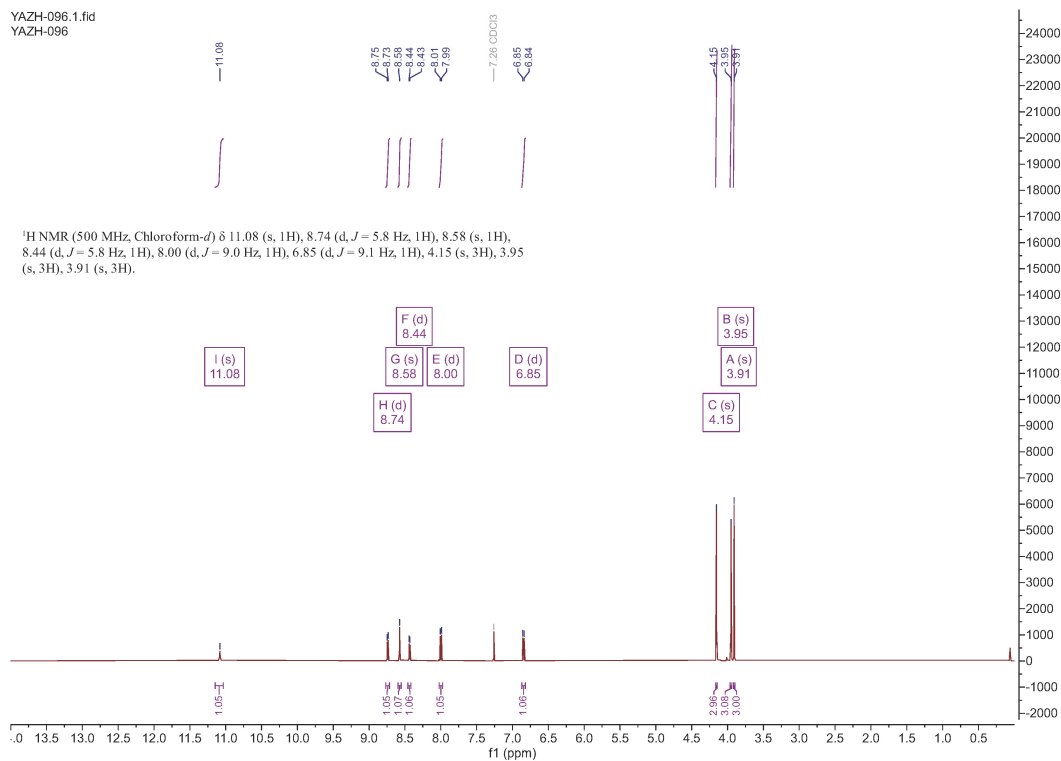

Figure S79  $^1\text{H}$  NMR spectrum of compound NPD-1197

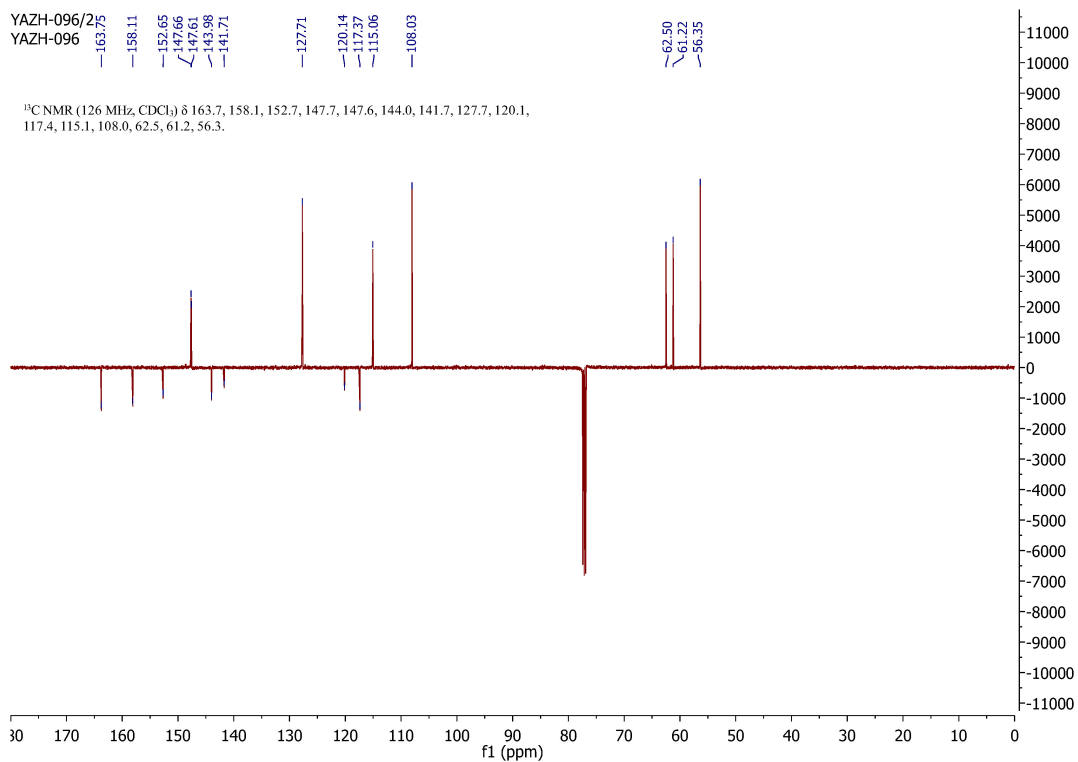

Figure S80  $^{13}\text{C}$  NMR spectrum of compound NPD-1197

Acquired by : Admin  
 Date Acquired : 1/26/2016 10:42:51 PM  
 Sample Name : Floor compound 71  
 Sample ID :  
 Tray# : 1  
 Vial# : 44  
 Injection Volume : 1  
 Data File : C:\LabSolutions\Methods\FAR Pract Floor compound 71.lcd  
 Background File : Blanco-2 26012016.lcd  
 Method File : Method SCAN ACID standard.lcm  
 Report Format : Default.LCMS.lcr  
 Tuning File : C:\LabSolutions\Tuning File\Tuning-ESI-pos-neg01072015.lct  
 Processed by : Admin  
 Modified Date : 1/27/2016 11:34:03 AM

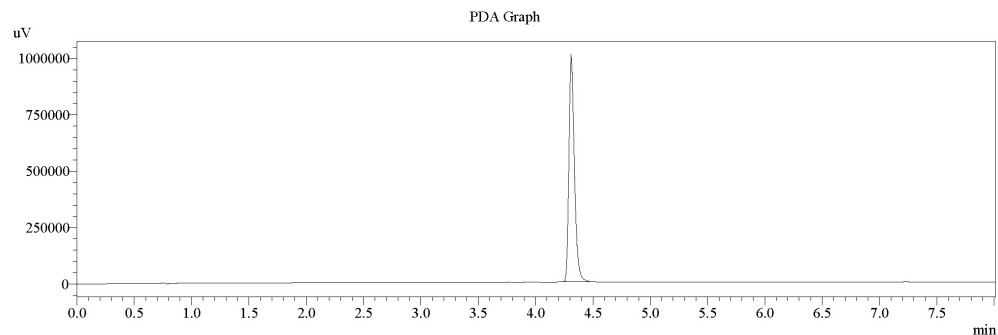

PDA Ch1 254nm 4nm

| Peak# | Name | Ret. Time | Area    | Area %  |
|-------|------|-----------|---------|---------|
| 1     |      | 4.306     | 3356031 | 100.000 |

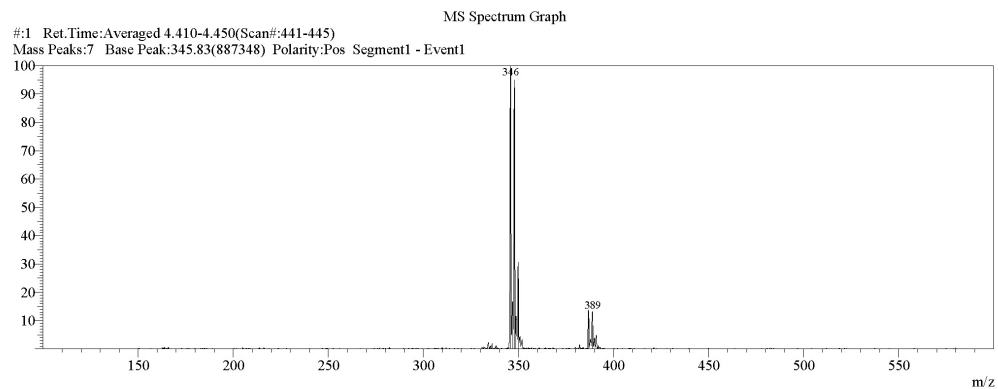

MS Spectrum Table

#1 Ret.Time:  
 BG Mode:None  
 Mass Peaks:7 Base Peak:345.83(804222) Polarity:Pos Segment1 - Event

| # | m/z    | Abs.Inten. | Rel.Inten. | Charge | Polarity | Monoisotopic | # | m/z    | Abs.Inten. | Rel.Inten. | Charge | Polarity | Monoisotopic |
|---|--------|------------|------------|--------|----------|--------------|---|--------|------------|------------|--------|----------|--------------|
| 1 | 345.83 | 804222     | 100.00     |        |          |              | 5 | 349.89 | 231288     | 28.76      |        |          |              |
| 2 | 346.96 | 125677     | 15.63      |        |          |              | 6 | 386.91 | 105571     | 13.13      |        |          |              |
| 3 | 347.89 | 786867     | 97.84      |        |          |              | 7 | 388.97 | 109803     | 13.65      |        |          |              |
| 4 | 348.76 | 99929      | 12.43      |        |          |              |   |        |            |            |        |          |              |

**Figure S81 LCMS spectrum of compound NPD-1198**

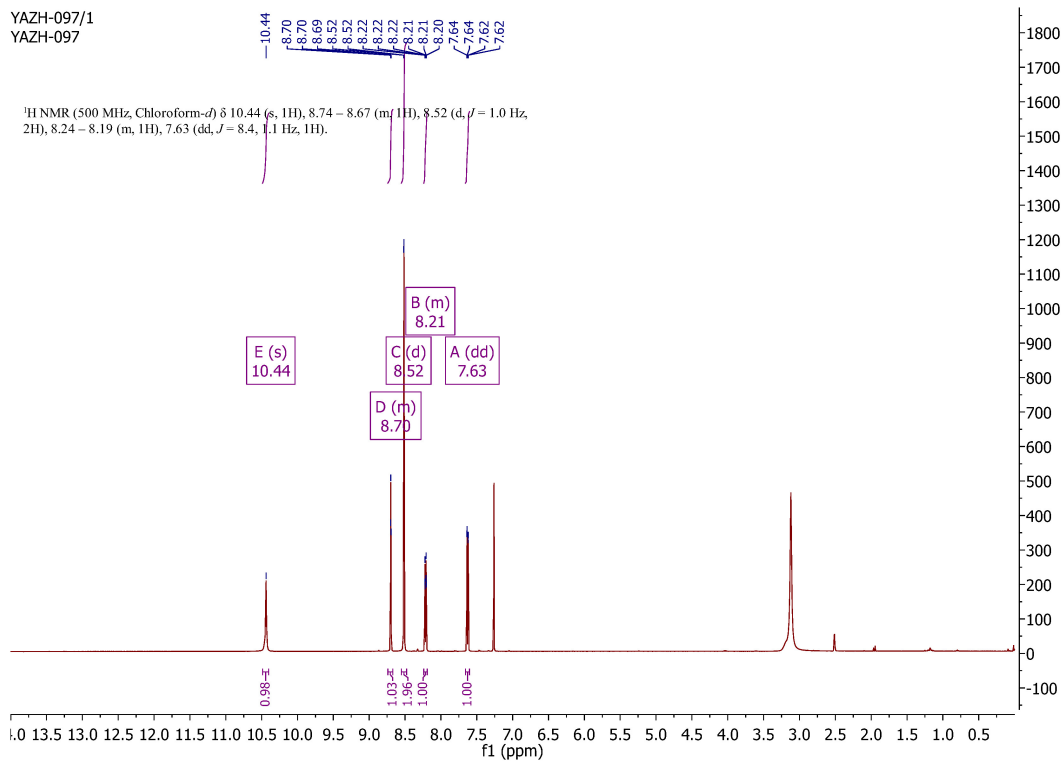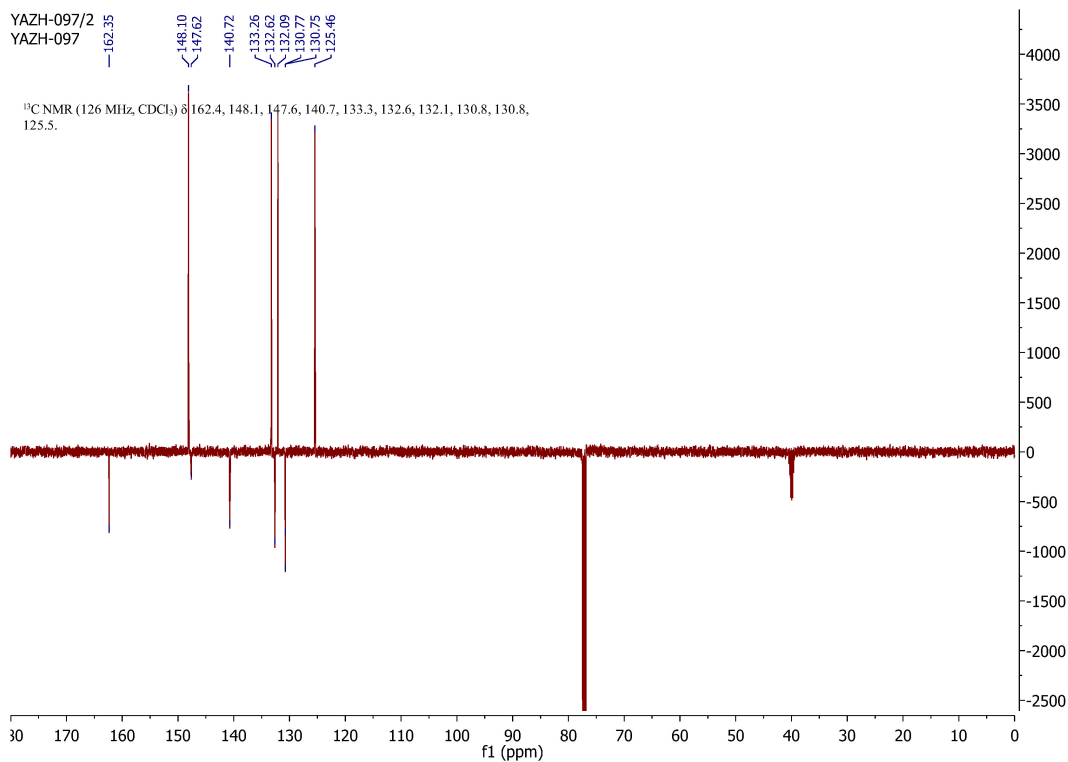



Acquired by : Admin  
 Date Acquired : 1/26/2016 7:23:57 PM  
 Sample Name : Jay compound 74  
 Sample ID :  
 Tray# : 1  
 Vial# : 21  
 Injection Volume : 1  
 Data File : C:\LabSolutions\Methods\FAR Pract Jay compound 74.lcd  
 Background File : Blanco-2 26012016.lcd  
 Method File : Method SCAN ACID standard.lcm  
 Report Format : Default1.CMS.lcr  
 Tuning File : C:\LabSolutions\Tuning File\Tuning-ESI-pos-neg01072015.lct  
 Processed by : Admin  
 Modified Date : 1/27/2016 9:50:12 AM

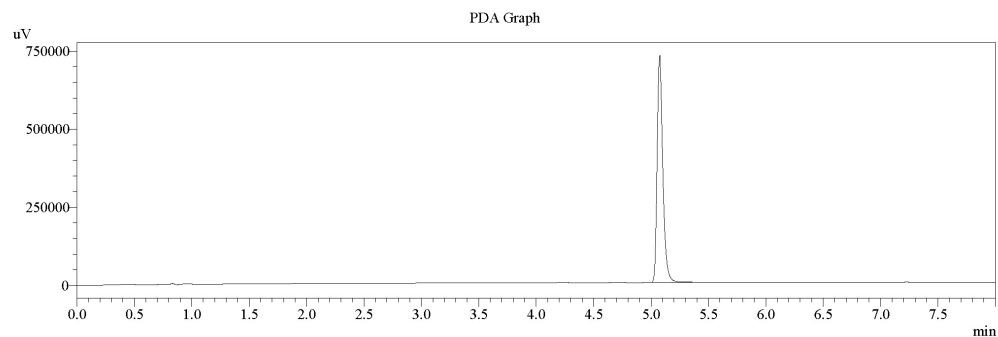

PDA Ch1 254nm 4nm

| Peak# | Name | Ret. Time | Area    | Area %  |
|-------|------|-----------|---------|---------|
| 1     |      | 5.070     | 2494903 | 100.000 |

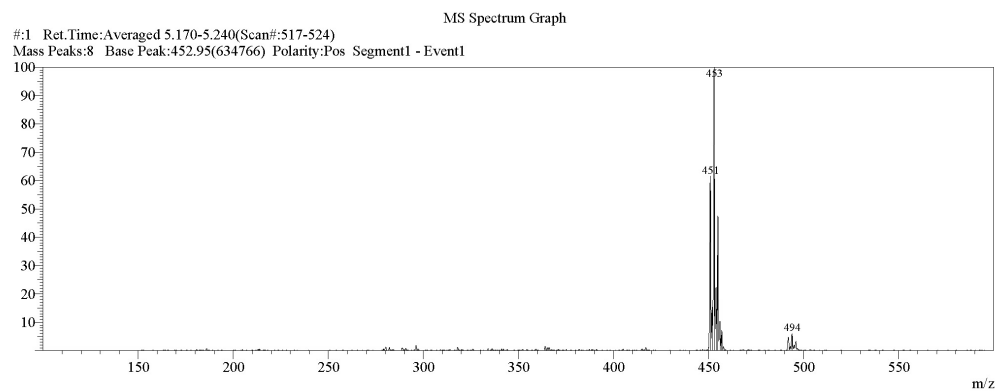

#1 Ret.Time:  
 BG Mode:None

Mass Peaks:8 Base Peak:452.95(593061) Polarity:Pos Segment1 - Event

| # | m/z    | Abs.Inten. | Rel.Inten. | Charge | Polarity | Monoisotopic | # | m/z    | Abs.Inten. | Rel.Inten. | Charge | Polarity | Monoisotopic |
|---|--------|------------|------------|--------|----------|--------------|---|--------|------------|------------|--------|----------|--------------|
| 1 | 450.95 | 374414     | 63.13      |        |          |              | 5 | 454.94 | 261926     | 44.17      |        |          |              |
| 2 | 452.01 | 85256      | 14.38      |        |          |              | 6 | 456.01 | 55285      | 9.32       |        |          |              |
| 3 | 452.95 | 593061     | 100.00     |        |          |              | 7 | 457.01 | 38313      | 6.46       |        |          |              |
| 4 | 453.94 | 131388     | 22.15      |        |          |              | 8 | 493.95 | 37433      | 6.31       |        |          |              |

Figure S84 LCMS spectrum of compound NPD-1199

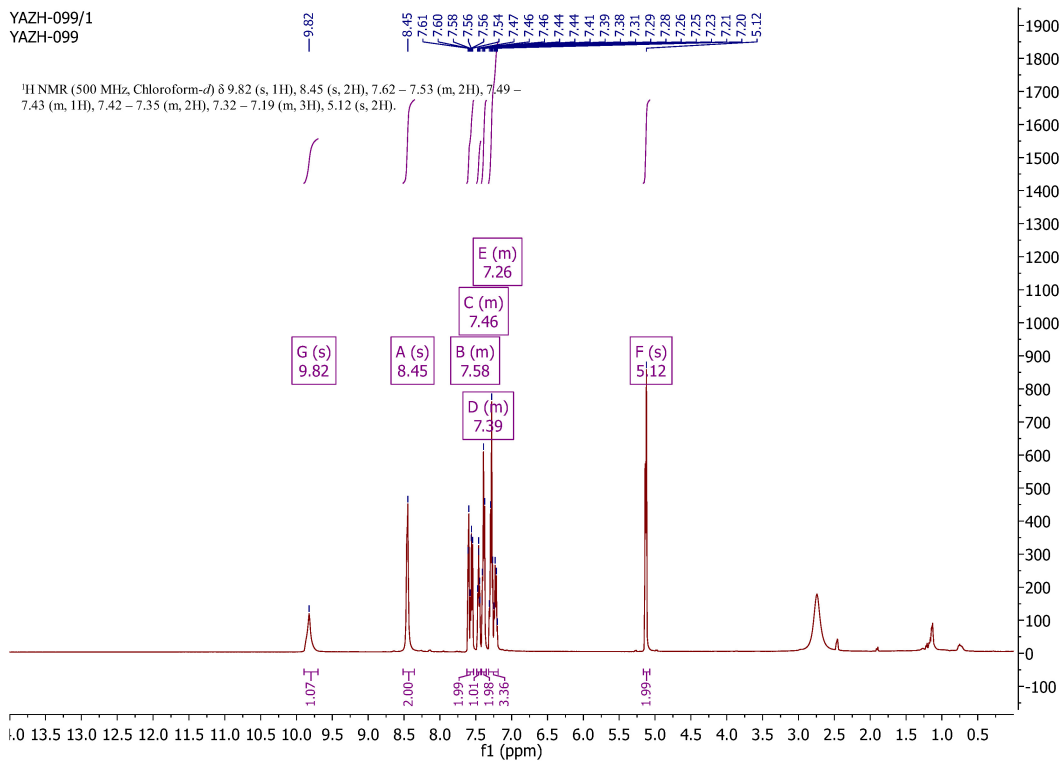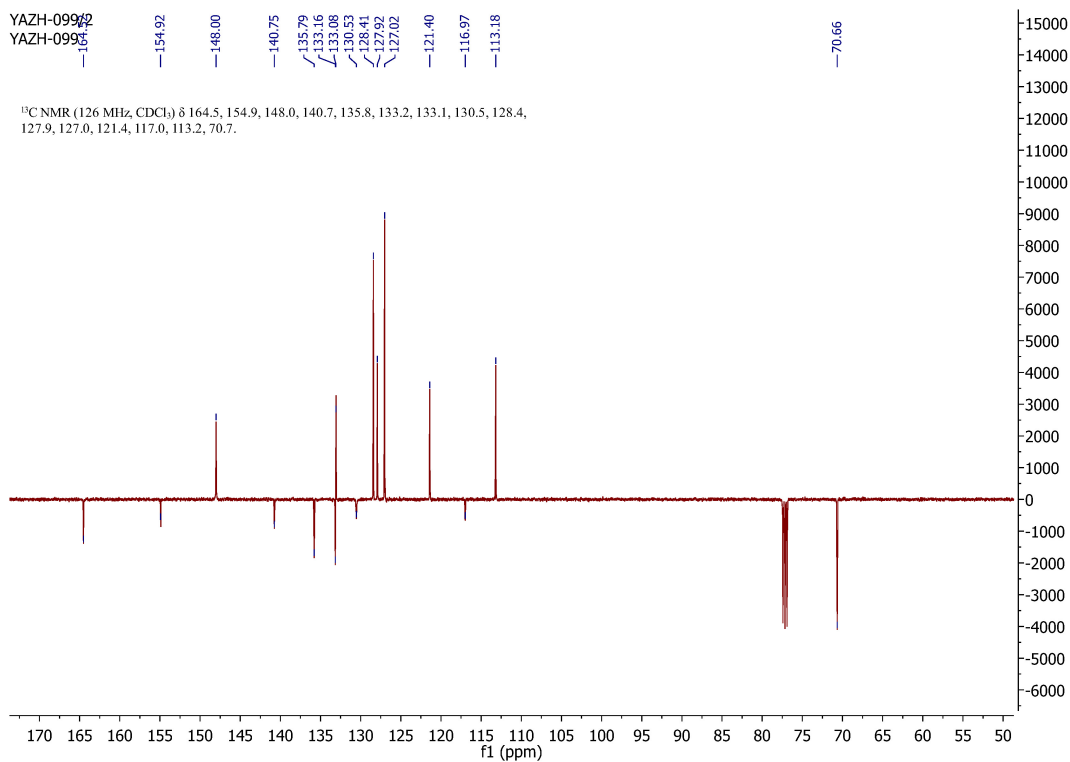

Acquired by : Admin  
 Date Acquired : 1/26/2016 7:32:35 PM  
 Sample Name : Fatema compound 75A  
 Sample ID :  
 Tray# : 1  
 Vial# : 22  
 Injection Volume : 1  
 Data File : C:\LabSolutions\Methods\FAR Pract Fatema compound 75A.lcd  
 Background File : Blanco-2 26012016.lcd  
 Method File : Method SCAN ACID standard.lcm  
 Report Format : DefaultL.CMS.lcr  
 Tuning File : C:\LabSolutions\Tuning File\Tuning-ESI-pos-neg01072015.lct  
 Processed by : Admin  
 Modified Date : 1/27/2016 9:55:29 AM

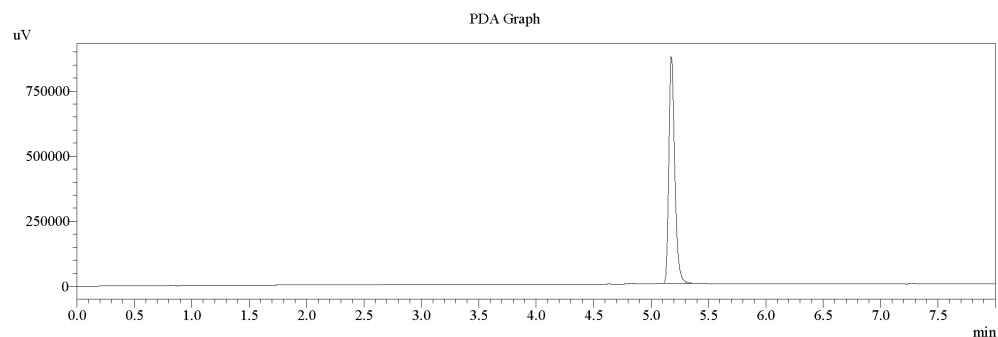

PDA Ch1 254nm 4nm

| Peak# | Name | Ret. Time | Area    | Area %  |
|-------|------|-----------|---------|---------|
| 1     |      | 5.173     | 3089682 | 100.000 |

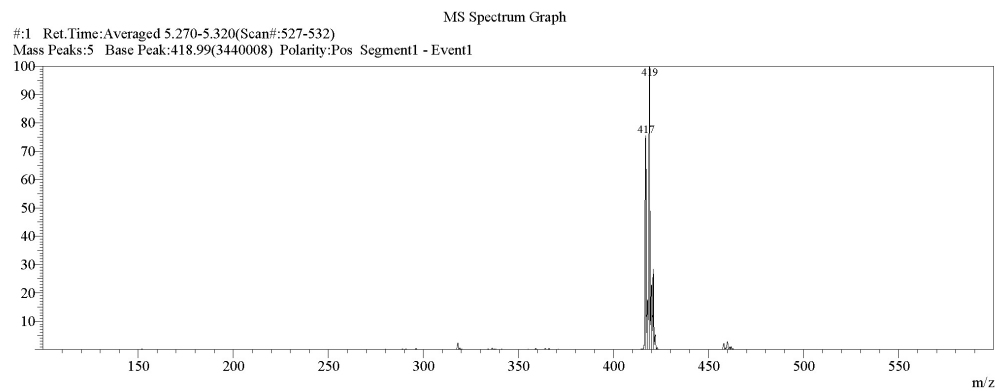

MS Spectrum Table

#1 Ret.Time:  
 BG Mode:None

Mass Peaks:5 Base Peak:418.99(3179486) Polarity:Pos Segment1 - Event

| # | m/z    | Abs.Inten. | Rel.Inten. | Charge | Polarity | Monoisotopic | # | m/z    | Abs.Inten. | Rel.Inten. | Charge | Polarity | Monoisotopic |
|---|--------|------------|------------|--------|----------|--------------|---|--------|------------|------------|--------|----------|--------------|
| 1 | 417.00 | 2499700    | 78.62      |        |          |              | 4 | 419.99 | 745467     | 23.45      |        |          |              |
| 2 | 417.93 | 561811     | 17.67      |        |          |              | 5 | 420.92 | 888480     | 27.94      |        |          |              |
| 3 | 418.99 | 3179486    | 100.00     |        |          |              |   |        |            |            |        |          |              |

**Figure S87 LCMS spectrum of compound NPD-1200**

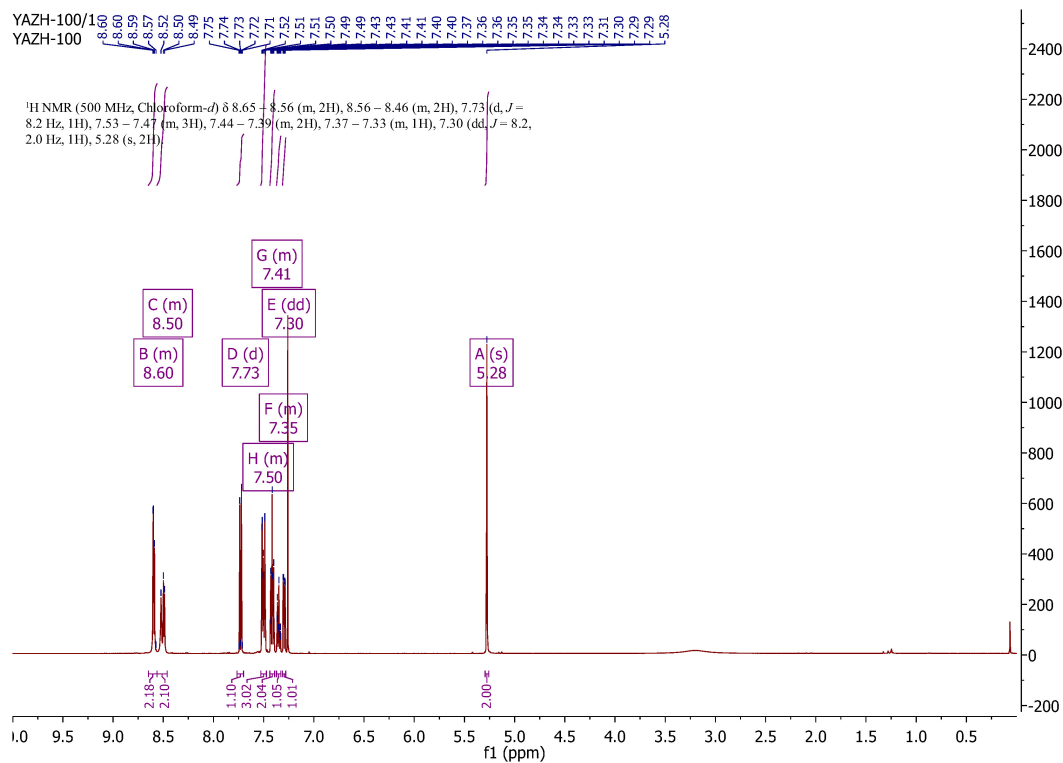

Figure S88 <sup>1</sup>H NMR spectrum of compound NPD-1200

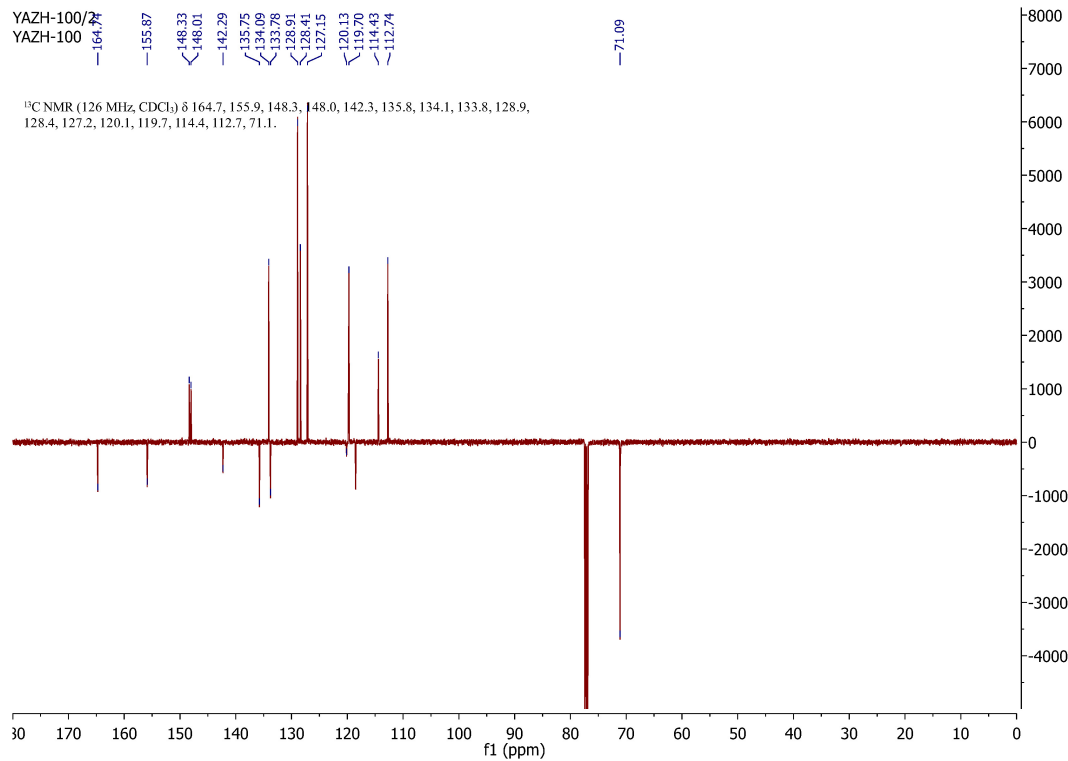

Figure S89 <sup>13</sup>C NMR spectrum of compound NPD-1200

Acquired by : Admin  
 Date Acquired : 1/26/2016 8:24:28 PM  
 Sample Name : Rosan K compound 78  
 Sample ID :  
 Tray# : 1  
 Vial# : 28  
 Injection Volume : 1  
 Data File : C:\LabSolutions\Methods\FAR Pract Rosan K compound 78.lcd  
 Background File : Blanco-2 26012016.lcd  
 Method File : Method SCAN ACID standard.lcm  
 Report Format : Default1.CMS.lcr  
 Tuning File : C:\LabSolutions\Tuning File\Tuning-ESI-pos-neg01072015.lct  
 Processed by : Admin  
 Modified Date : 1/27/2016 10:08:26 AM

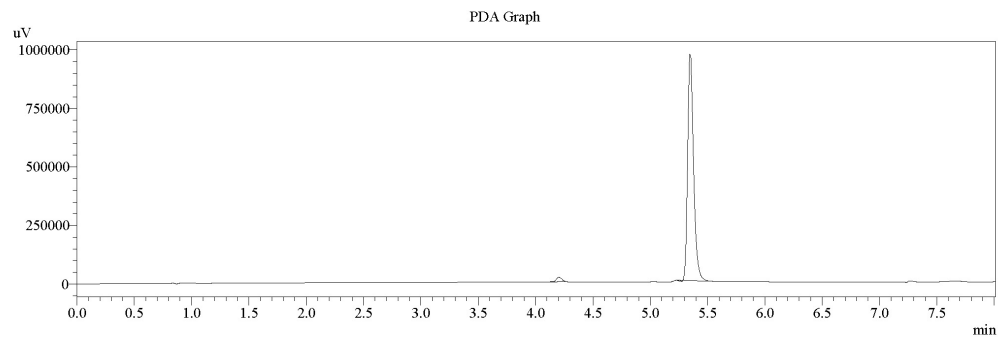

PDA Ch1 254nm 4nm

| Peak# | Name | Ret. Time | Area    | Area % |
|-------|------|-----------|---------|--------|
| 1     |      | 4.199     | 65625   | 1.850  |
| 2     |      | 5.344     | 3481795 | 98.150 |

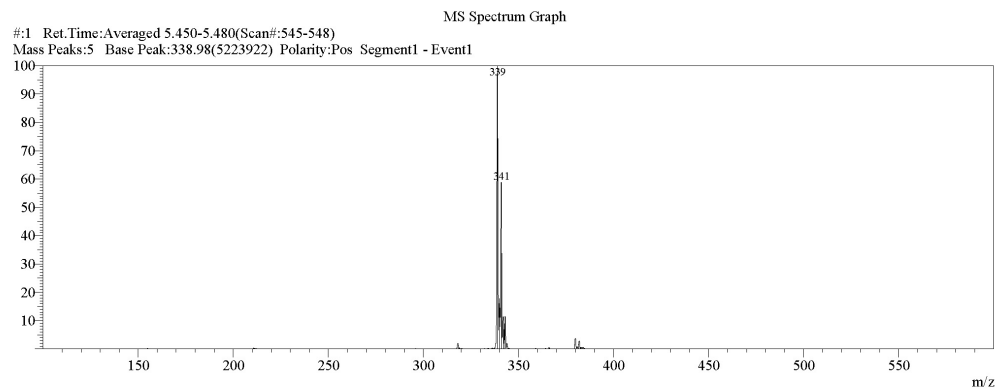

MS Spectrum Table

#1 Ret.Time:  
 BG Mode:None  
 Mass Peaks:5 Base Peak:338.98(4826833) Polarity:Pos Segment1 - Event

| # | m/z    | Abs.Inten. | Rel.Inten. | Charge | Polarity | Monoisotopic | # | m/z    | Abs.Inten. | Rel.Inten. | Charge | Polarity | Monoisotopic |
|---|--------|------------|------------|--------|----------|--------------|---|--------|------------|------------|--------|----------|--------------|
| 1 | 338.98 | 4826833    | 100.00     |        |          |              | 4 | 342.04 | 543457     | 11.26      |        |          |              |
| 2 | 340.04 | 867402     | 17.97      |        |          |              | 5 | 343.04 | 515410     | 10.68      |        |          |              |
| 3 | 341.04 | 2801323    | 58.04      |        |          |              |   |        |            |            |        |          |              |

**Figure S90 LCMS spectrum of compound NPD-1201**

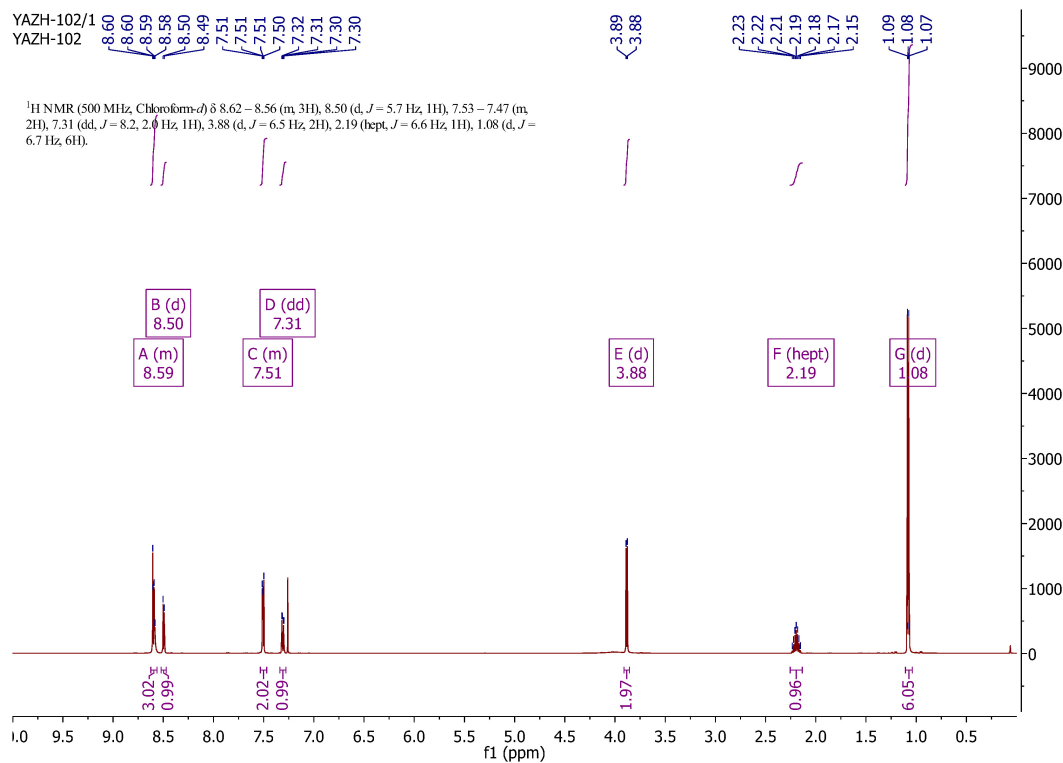

Figure S91 <sup>1</sup>H NMR spectrum of compound NPD-1201

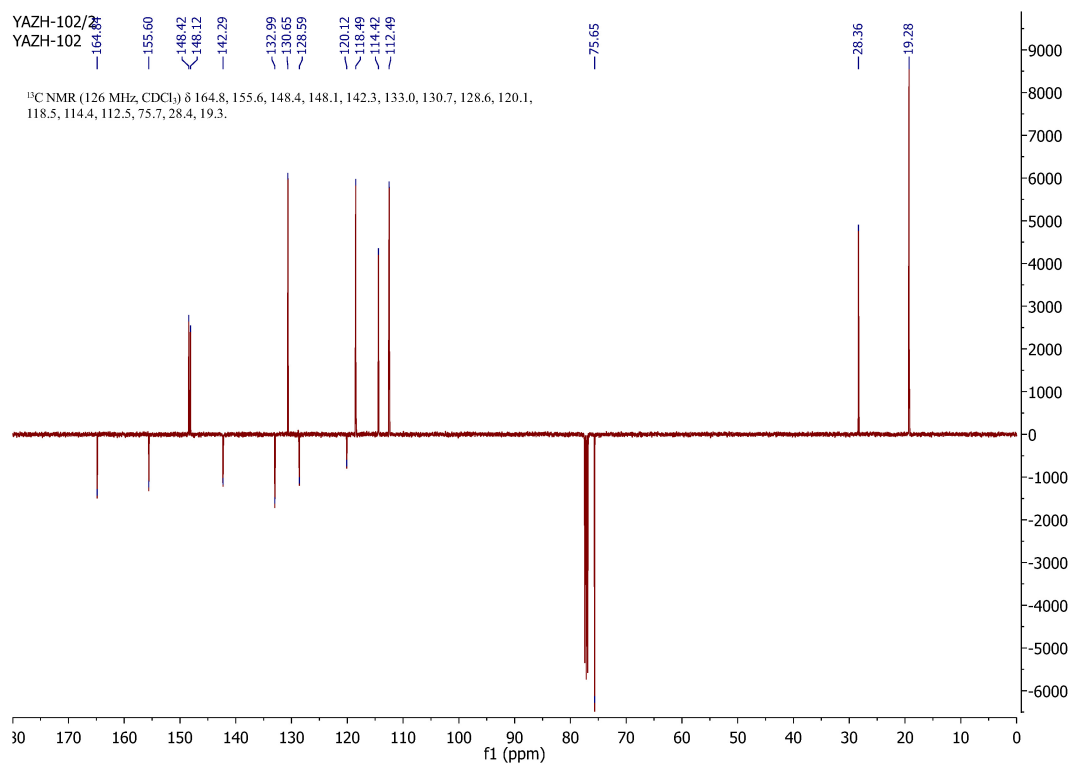

Figure S92 <sup>13</sup>C NMR spectrum of compound NPD-1201

Acquired by : Admin  
 Date Acquired : 3/5/2019 3:12:41 PM  
 Sample Name : YAZH-103  
 Sample ID :  
 Tray# : 1  
 Vial# : 8  
 Injection Volume : 3  
 Data File : C:\LabSolutions\Data\2019\wk18\YAZH-103.lcd  
 Background File : blanco 03052019.lcd  
 Method File : Method SCAN ACID standard.lcm  
 Report Format : Default1.CMS.lcr  
 Tuning File : C:\LabSolutions\Tuning\Tuning-ESI-pos-neg01072015a.lct  
 Processed by : Admin  
 Modified Date : 3/5/2019 3:47:13 PM

Medicinal Chemistry  
 Vrije Universiteit Amsterdam

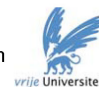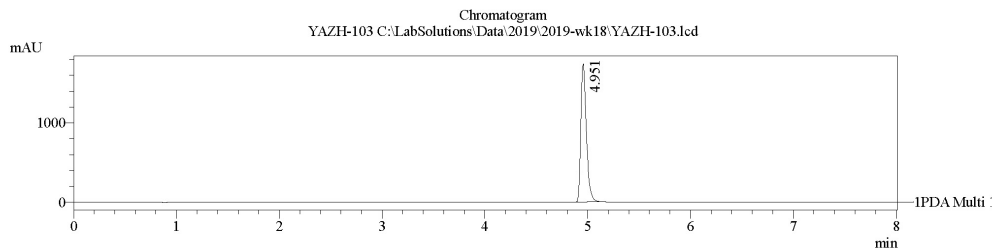

| Peak# | Name | Ret. Time | Area    | Area %  |
|-------|------|-----------|---------|---------|
| 1     |      | 4.951     | 6511021 | 100.000 |

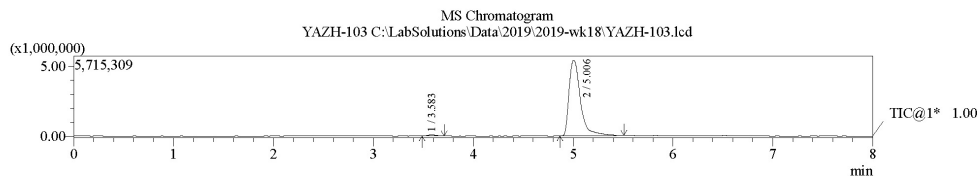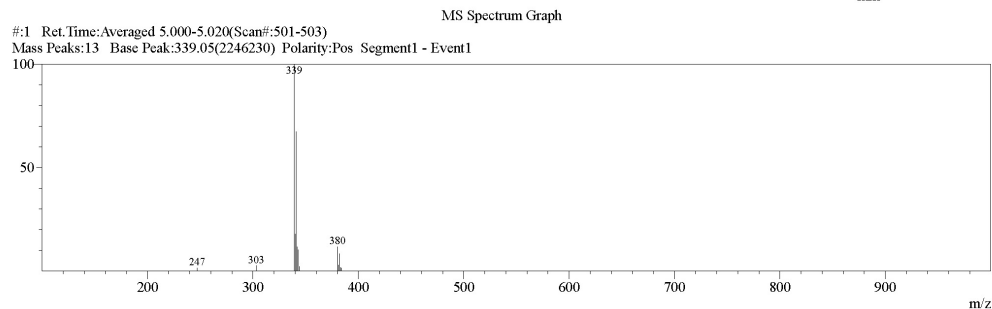

MS Spectrum Table

#1 Ret.Time:  
 BG Mode:Calc 4.870<->5.510(488<->552)  
 Mass Peaks:13 Base Peak:339.05(2246230) Polarity:Pos Segment1 - Event1

| # | m/z    | Abs.Inten. | Rel.Inten. | Charge | Polarity | Monoisotopic | #  | m/z    | Abs.Inten. | Rel.Inten. | Charge | Polarity | Monoisotopic |
|---|--------|------------|------------|--------|----------|--------------|----|--------|------------|------------|--------|----------|--------------|
| 1 | 246.95 | 28892      | 1.29       |        |          |              | 8  | 344.05 | 44618      | 1.99       |        |          |              |
| 2 | 303.05 | 55544      | 2.47       |        |          |              | 9  | 380.10 | 262473     | 11.69      |        |          |              |
| 3 | 339.05 | 2246230    | 100.00     |        |          |              | 10 | 381.10 | 60800      | 2.71       |        |          |              |
| 4 | 340.05 | 398781     | 17.75      |        |          |              | 11 | 382.10 | 187956     | 8.37       |        |          |              |
| 5 | 341.00 | 1515279    | 67.46      |        |          |              | 12 | 383.05 | 33808      | 1.51       |        |          |              |
| 6 | 342.00 | 262388     | 11.68      |        |          |              | 13 | 384.05 | 28437      | 1.27       |        |          |              |
| 7 | 343.00 | 226478     | 10.08      |        |          |              |    |        |            |            |        |          |              |

Figure S93 LCMS spectrum of compound NPD-1202

YAZH-103/3

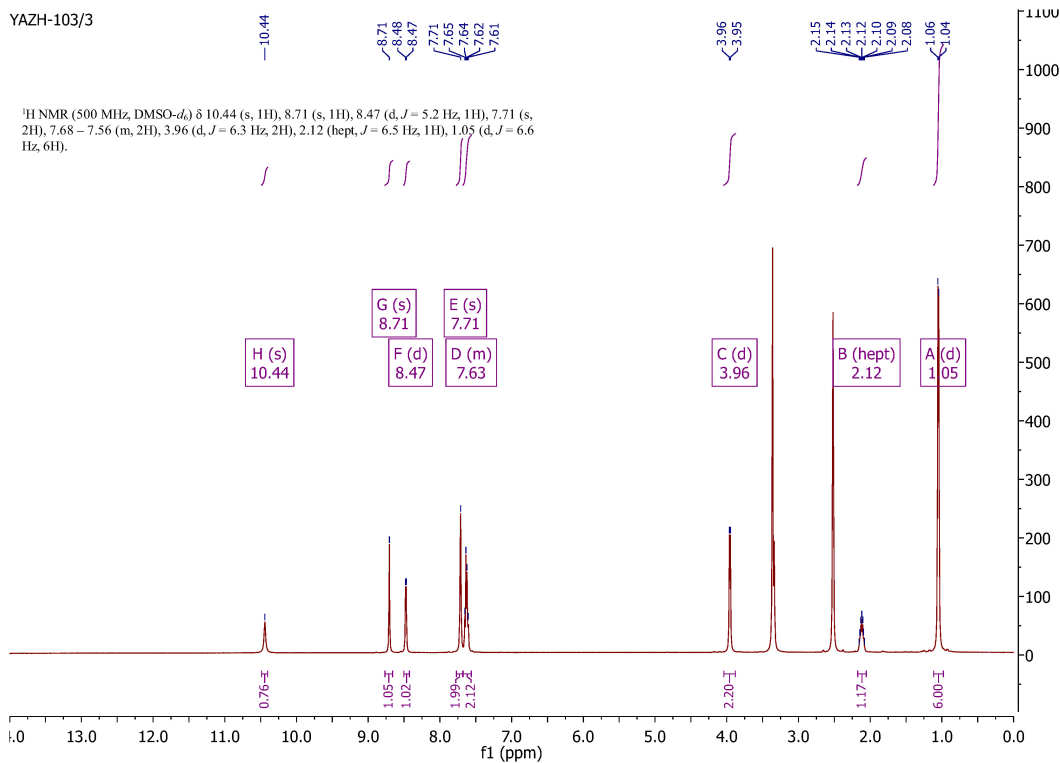Figure S94 <sup>1</sup>H NMR spectrum of compound NPD-1202

YAZH-103/4

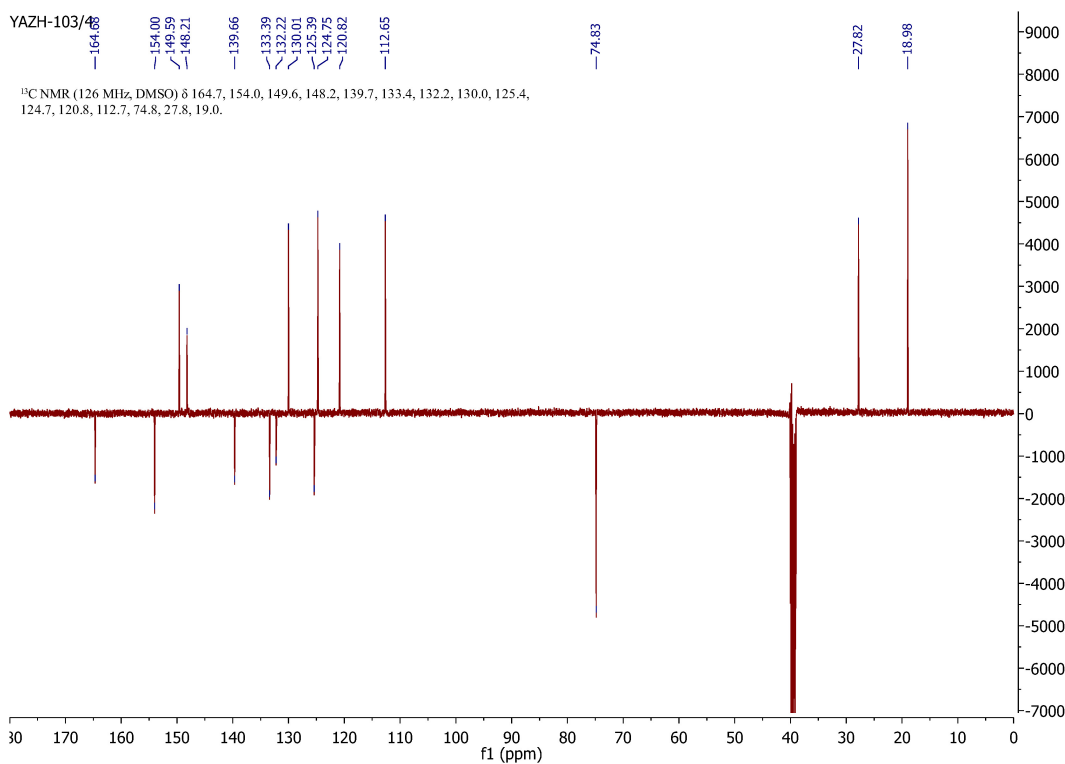Figure S95 <sup>13</sup>C NMR spectrum of compound NPD-1202



Acquired by : Admin  
 Date Acquired : 1/26/2016 8:59:07 PM  
 Sample Name : Tamara compound 82  
 Sample ID :  
 Tray# : 1  
 Vial# : 32  
 Injection Volume : 1  
 Data File : C:\LabSolutions\Methods\FAR Pract Tamara compound 82.lcd  
 Background File : Blanco-2 26012016.lcd  
 Method File : Method SCAN ACID standard.lcm  
 Report Format : DefaultL.CMS.lcr  
 Tuning File : C:\LabSolutions\Tuning File\Tuning-ESI-pos-neg01072015.lct  
 Processed by : Admin  
 Modified Date : 1/27/2016 10:15:46 AM

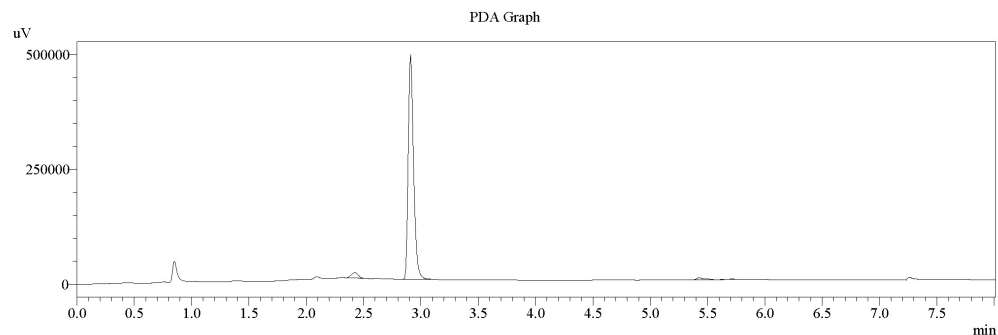

PDA Ch1 254nm 4nm

| Peak# | Name | Ret. Time | Area    | Area % |
|-------|------|-----------|---------|--------|
| 1     |      | 2.419     | 45731   | 2.788  |
| 2     |      | 2.904     | 1567771 | 95.589 |
| 3     |      | 5.422     | 20848   | 1.271  |
| 4     |      | 5.708     | 5769    | 0.352  |

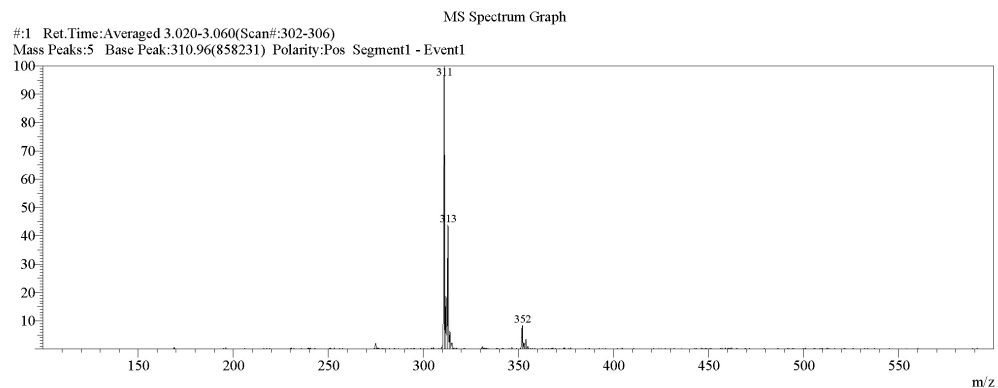

MS Spectrum Table

#1 Ret.Time:  
 BG Mode:None  
 Mass Peaks:5 Base Peak:310.96(779830) Polarity:Pos Segment1 - Event

| # | m/z    | Abs.Inten. | Rel.Inten. | Charge | Polarity | Monoisotopic | # | m/z    | Abs.Inten. | Rel.Inten. | Charge | Polarity | Monoisotopic |
|---|--------|------------|------------|--------|----------|--------------|---|--------|------------|------------|--------|----------|--------------|
| 1 | 310.96 | 779830     | 100.00     |        |          |              | 4 | 313.95 | 43430      | 5.57       |        |          |              |
| 2 | 311.89 | 138952     | 17.82      |        |          |              | 5 | 352.02 | 70113      | 8.99       |        |          |              |
| 3 | 312.95 | 320056     | 41.04      |        |          |              |   |        |            |            |        |          |              |

**Figure S96 LCMS spectrum of compound NPD-1203**

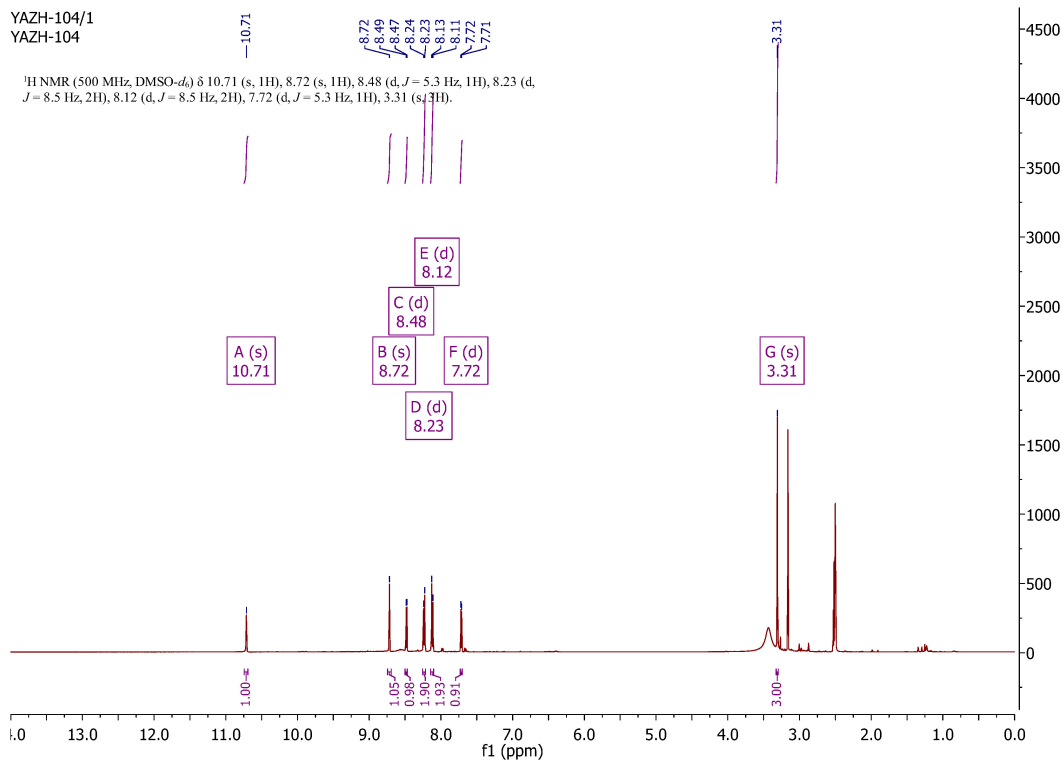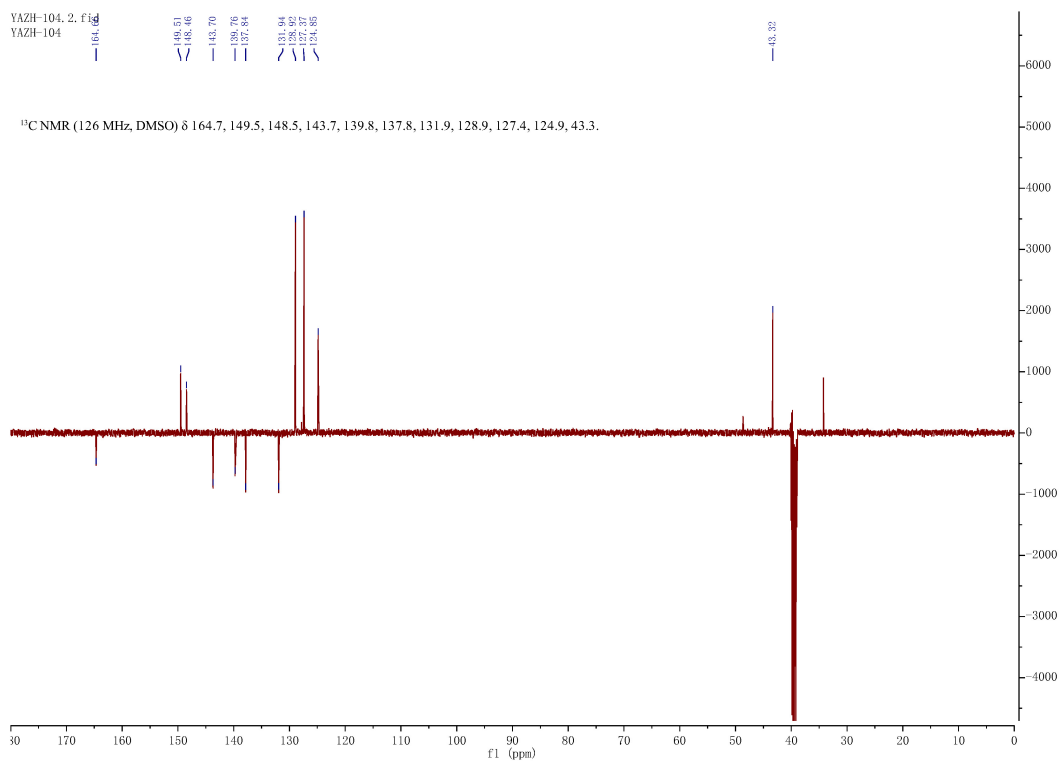

Acquired by : Admin  
 Date Acquired : 1/26/2016 9:51:03 PM  
 Sample Name : Aron compound 85  
 Sample ID :  
 Tray# : 1  
 Vial# : 38  
 Injection Volume : 1  
 Data File : C:\LabSolutions\Methods\FAR Pract Aron compound 85.lcd  
 Background File : Blanco-2 26012016.lcd  
 Method File : Method SCAN ACID standard.lcm  
 Report Format : DefaultL.CMS.lcr  
 Tuning File : C:\LabSolutions\Tuning File\Tuning-ESI-pos-neg01072015.lct  
 Processed by : Admin  
 Modified Date : 1/27/2016 10:50:49 AM

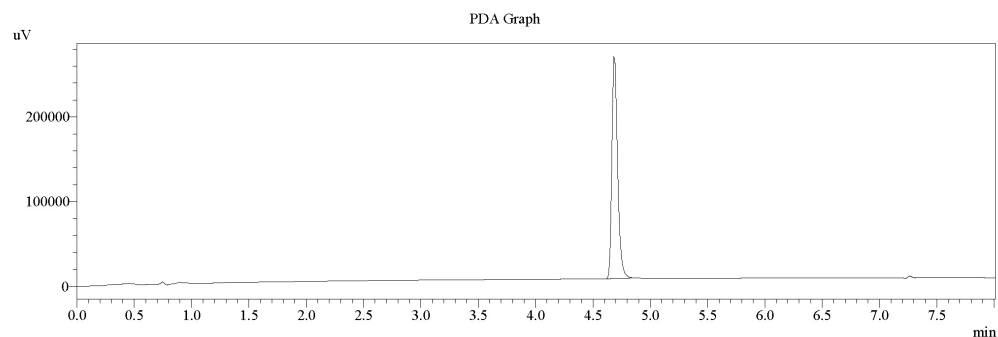

PDA Ch1 254nm 4nm

| Peak# | Name | Ret. Time | Area   | Area %  |
|-------|------|-----------|--------|---------|
| 1     |      | 4.681     | 907011 | 100.000 |

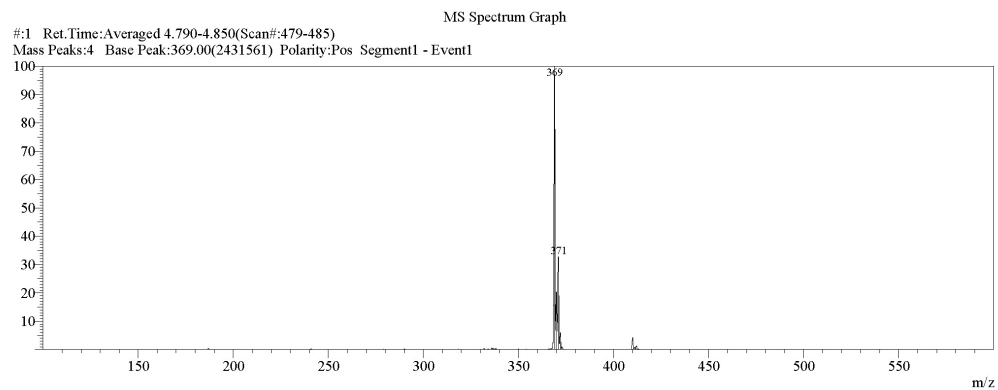

MS Spectrum Table

#1 Ret.Time:  
 BG Mode:None

Mass Peaks:4 Base Peak:369.00(2276897) Polarity:Pos Segment1 - Event

| # | m/z    | Abs.Inten. | Rel.Inten. | Charge | Polarity | Monoisotopic | # | m/z    | Abs.Inten. | Rel.Inten. | Charge | Polarity | Monoisotopic |
|---|--------|------------|------------|--------|----------|--------------|---|--------|------------|------------|--------|----------|--------------|
| 1 | 369.00 | 2276897    | 100.00     |        |          |              | 3 | 371.06 | 734239     | 32.25      |        |          |              |
| 2 | 369.93 | 458155     | 20.12      |        |          |              | 4 | 372.06 | 124487     | 5.47       |        |          |              |

**Figure S99 LCMS spectrum of compound NPD-1204**

YAZH-106.1.fid  
YAZH-106

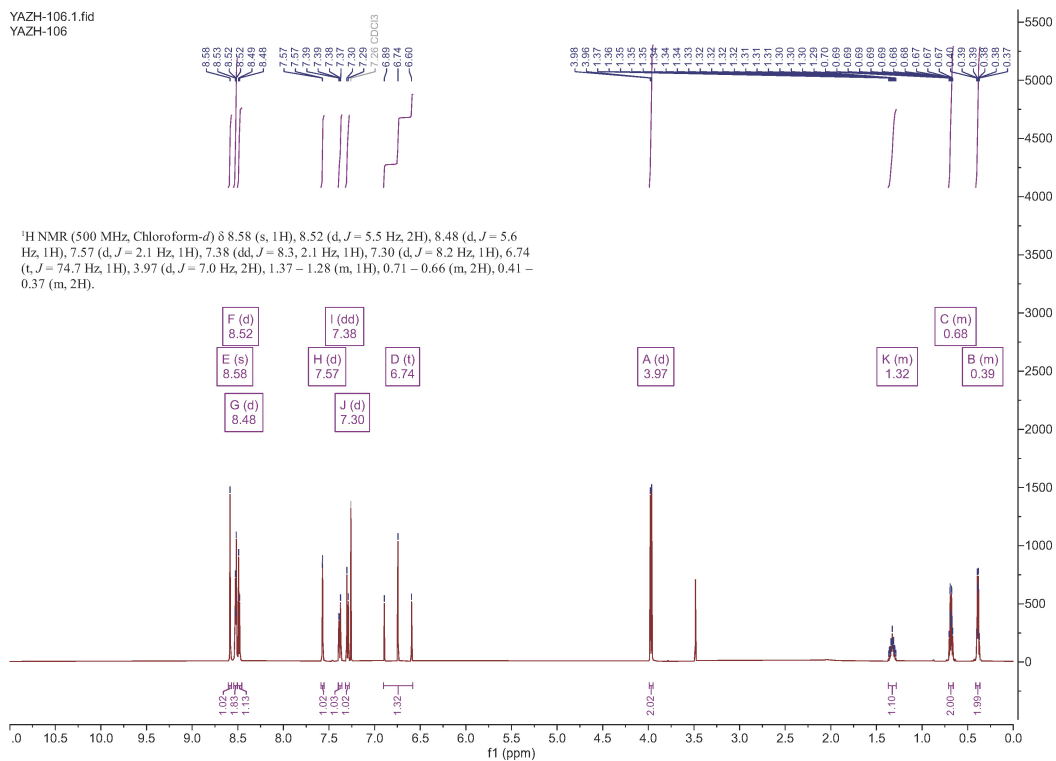

Figure S100 <sup>1</sup>H NMR spectrum of compound NPD-1204

YAZH-106.2.fid  
YAZH-106

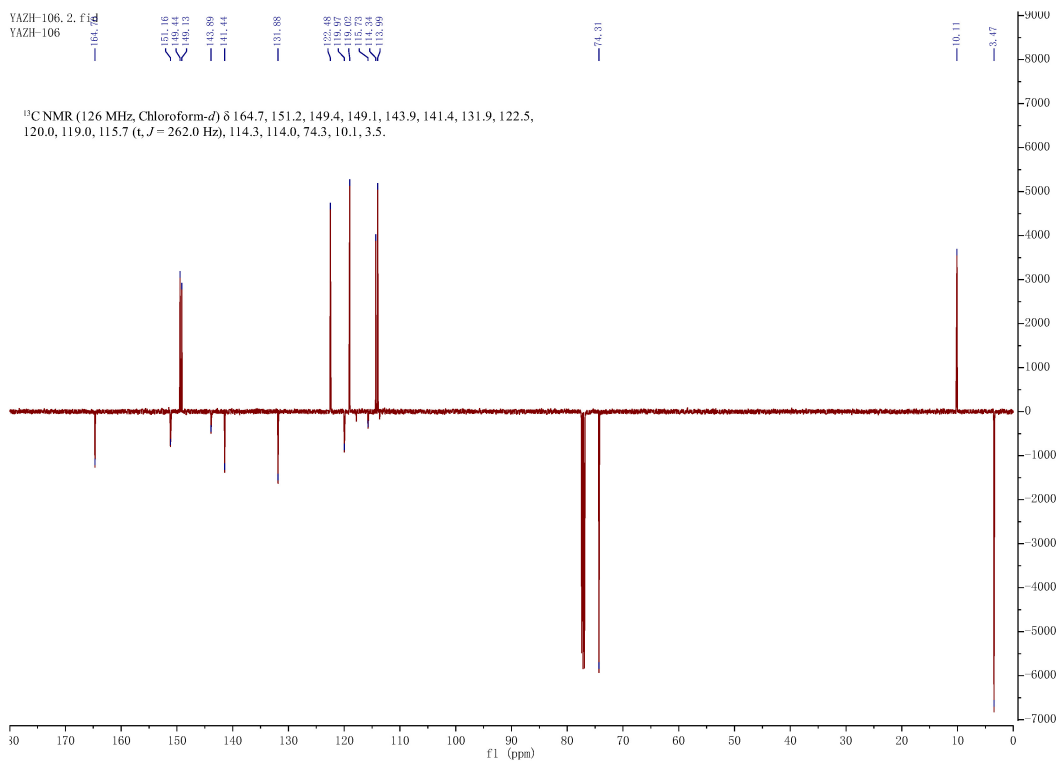

Figure S101 <sup>13</sup>C NMR spectrum of compound NPD-1204

Acquired by : Admin  
 Date Acquired : 3/5/2019 3:21:20 PM  
 Sample Name : YAZH-107  
 Sample ID :  
 Tray# : 1  
 Vial# : 9  
 Injection Volume : 3  
 Data File : C:\LabSolutions\Data\2019\2019-wk18\YAZH-107.lcd  
 Background File : blanco 03052019.lcd  
 Method File : Method SCAN ACID standard.lcm  
 Report Format : DefaultL.CMS.lcr  
 Tuning File : C:\LabSolutions\Tuning\Tuning-ESI-pos-neg01072015a.lct  
 Processed by : Admin  
 Modified Date : 3/5/2019 3:48:58 PM

Medicinal Chemistry  
 Vrije Universiteit Amsterdam

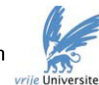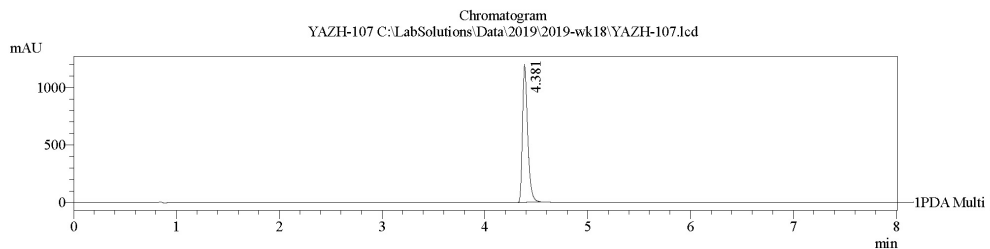

| Peak# | Name | Ret. Time | Area    | Area %  |
|-------|------|-----------|---------|---------|
| 1     |      | 4.381     | 4206090 | 100.000 |

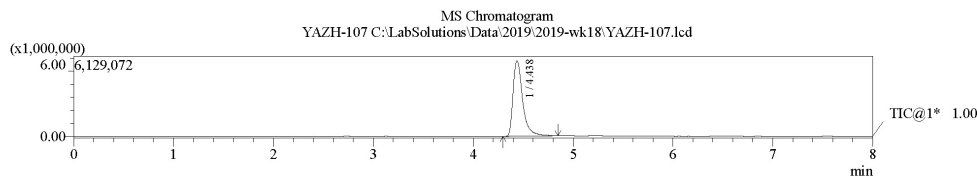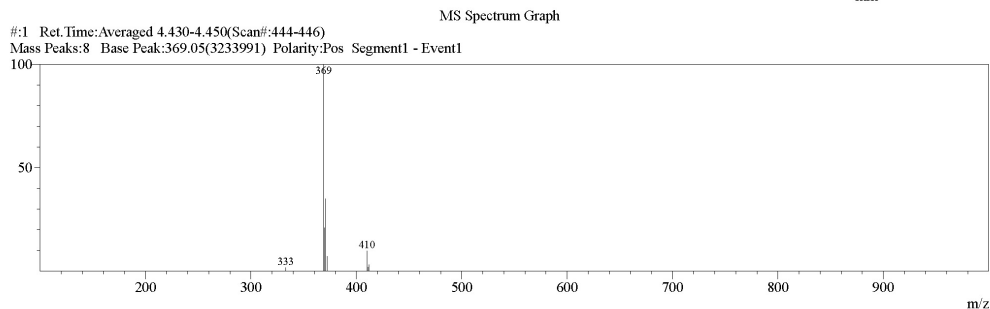

MS Spectrum Table

| # | m/z    | Abs.Inten. | Rel.Inten. | Charge | Polarity | Monoisotopic |
|---|--------|------------|------------|--------|----------|--------------|
| 1 | 333.00 | 54730      | 1.69       |        |          |              |
| 2 | 369.05 | 3233991    | 100.00     |        |          |              |
| 3 | 370.05 | 673836     | 20.84      |        |          |              |
| 4 | 371.05 | 1129791    | 34.93      |        |          |              |
| 5 | 372.05 | 229595     | 7.10       |        |          |              |
| 6 | 410.05 | 313094     | 9.68       |        |          |              |
| 7 | 411.10 | 58022      | 1.79       |        |          |              |
| 8 | 412.05 | 100478     | 3.11       |        |          |              |

Figure S102 LCMS spectrum of compound NPD-1205

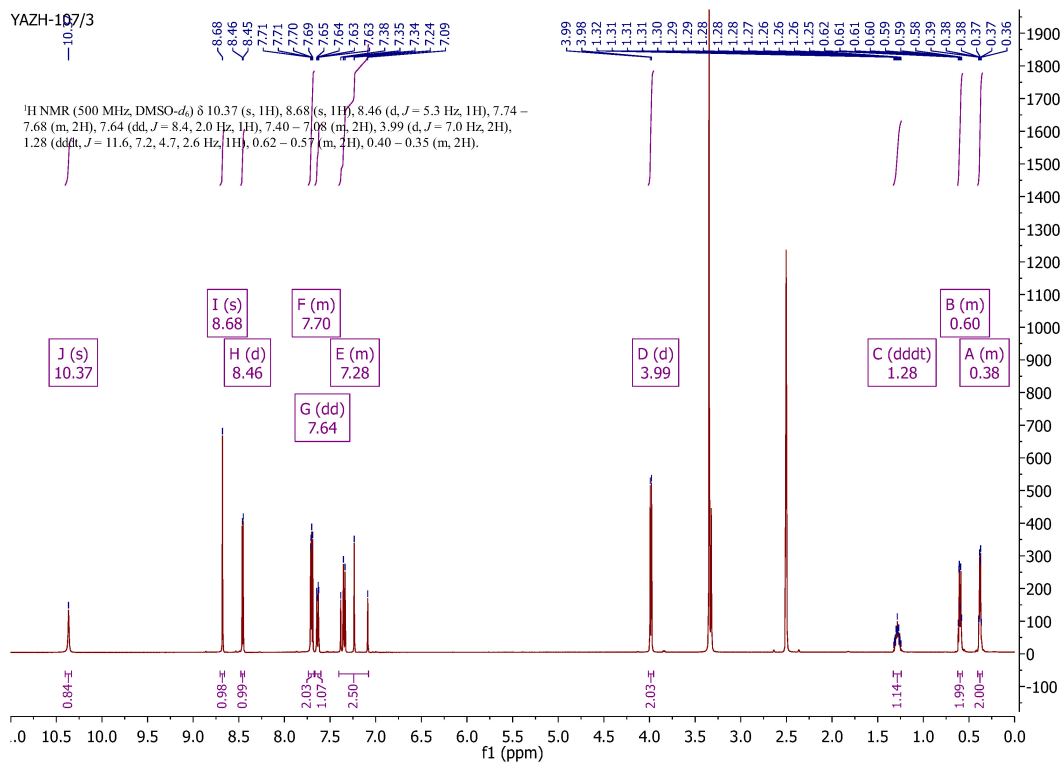

Figure S103  $^1\text{H}$  NMR spectrum of compound NPD-1205

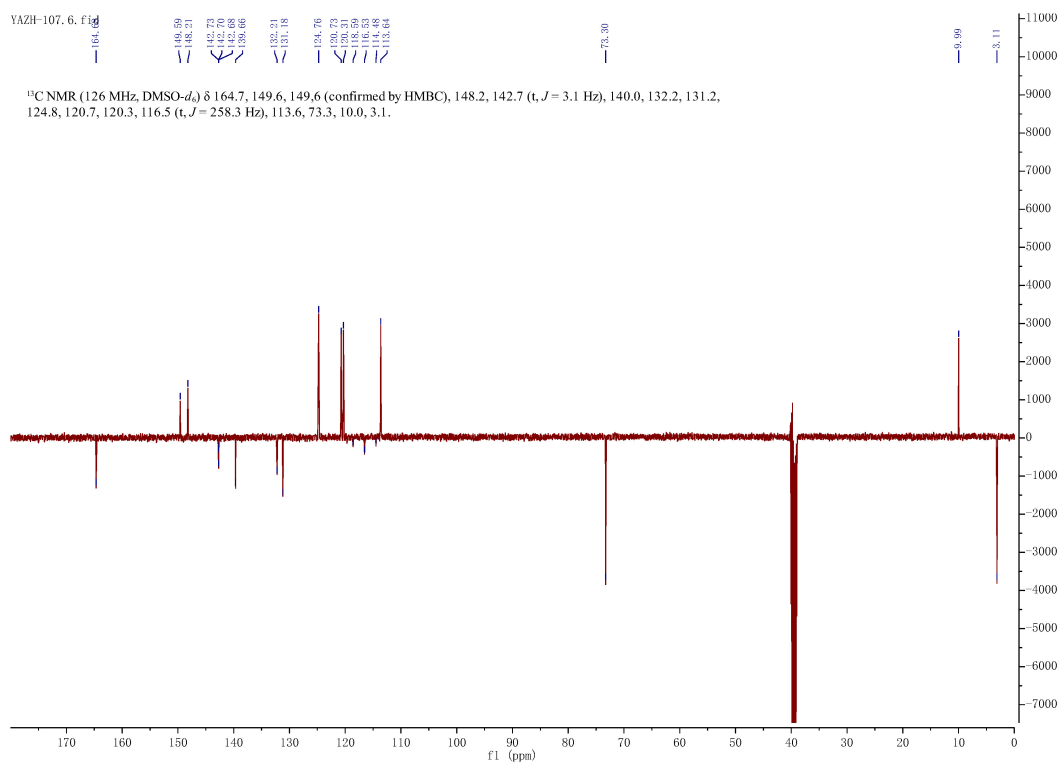

Figure S104  $^{13}\text{C}$  NMR spectrum of compound NPD-1205

Acquired by : Admin  
 Date Acquired : 1/26/2016 11:00:06 PM  
 Sample Name : Robbert compound 77  
 Sample ID :  
 Tray# : 1  
 Vial# : 46  
 Injection Volume : 1  
 Data File : C:\LabSolutions\Methods\FAR Pract Robbert compound 77.lcd  
 Background File : Blanco-2 26012016.lcd  
 Method File : Method SCAN ACID standard.lcm  
 Report Format : DefaultL.CMS.lcr  
 Tuning File : C:\LabSolutions\Tuning File\Tuning-ESI-pos-neg01072015.lct  
 Processed by : Admin  
 Modified Date : 1/27/2016 11:35:49 AM

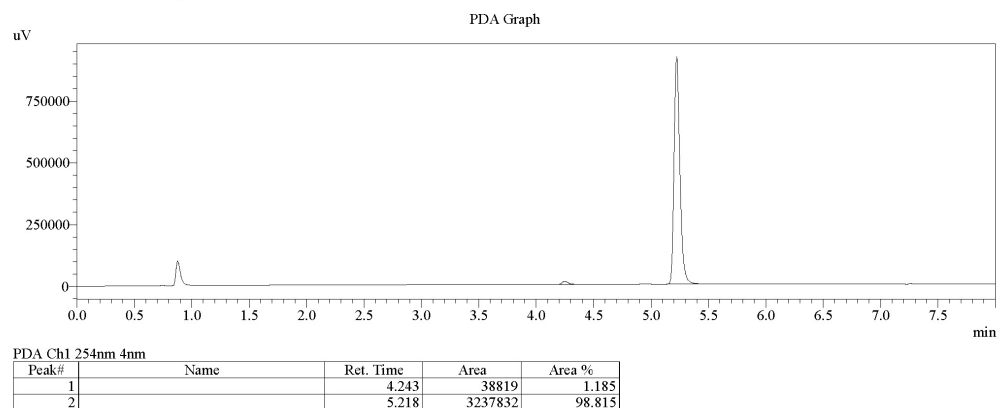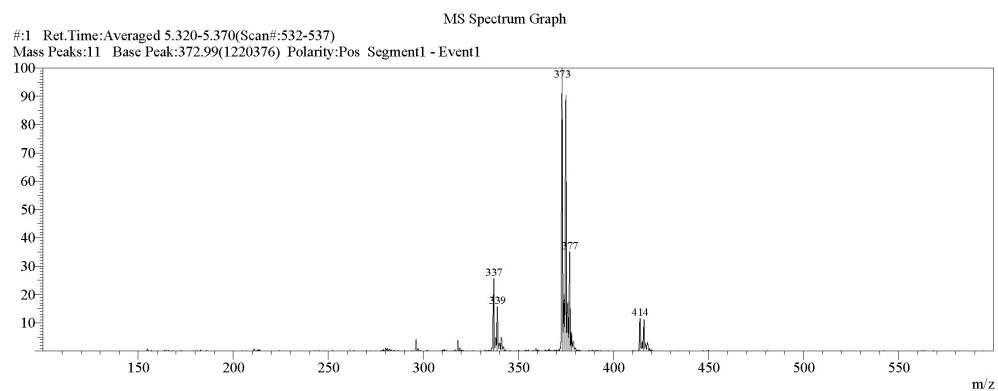

MS Spectrum Table

#1 Ret.Time:  
BG Mode:None

Mass Peaks:11 Base Peak:372.99(996605) Polarity:Pos Segment1 - Event

| # | m/z    | Abs.Inten. | Rel.Inten. | Charge | Polarity | Monoisotopic | #  | m/z    | Abs.Inten. | Rel.Inten. | Charge | Polarity | Monoisotopic |
|---|--------|------------|------------|--------|----------|--------------|----|--------|------------|------------|--------|----------|--------------|
| 1 | 337.05 | 259467     | 26.04      |        |          |              | 7  | 375.99 | 178375     | 17.90      |        |          |              |
| 2 | 338.91 | 157288     | 15.78      |        |          |              | 8  | 376.99 | 322428     | 32.35      |        |          |              |
| 3 | 340.97 | 58254      | 5.85       |        |          |              | 9  | 377.92 | 67191      | 6.74       |        |          |              |
| 4 | 372.99 | 996605     | 100.00     |        |          |              | 10 | 414.00 | 129525     | 13.00      |        |          |              |
| 5 | 374.06 | 205801     | 20.65      |        |          |              | 11 | 416.06 | 110035     | 11.04      |        |          |              |
| 6 | 374.99 | 921759     | 92.49      |        |          |              |    |        |            |            |        |          |              |

**Figure S105 LCMS spectrum of compound NPD-1206**

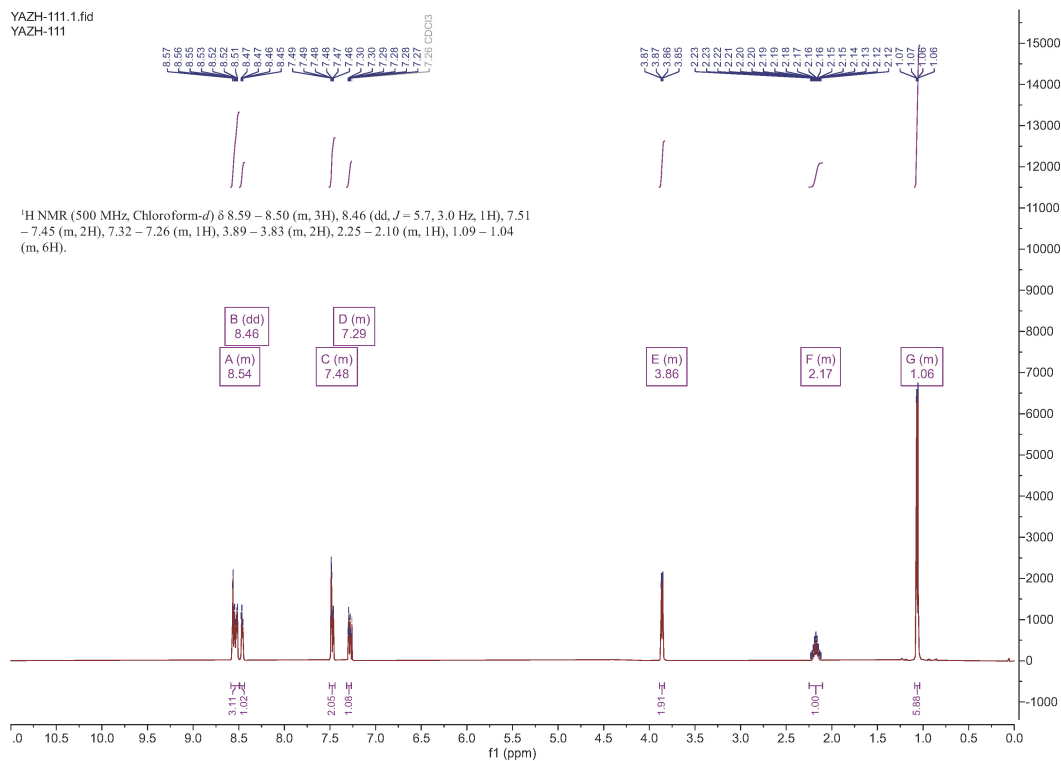

Figure S106  $^1\text{H}$  NMR spectrum of compound NPD-1206

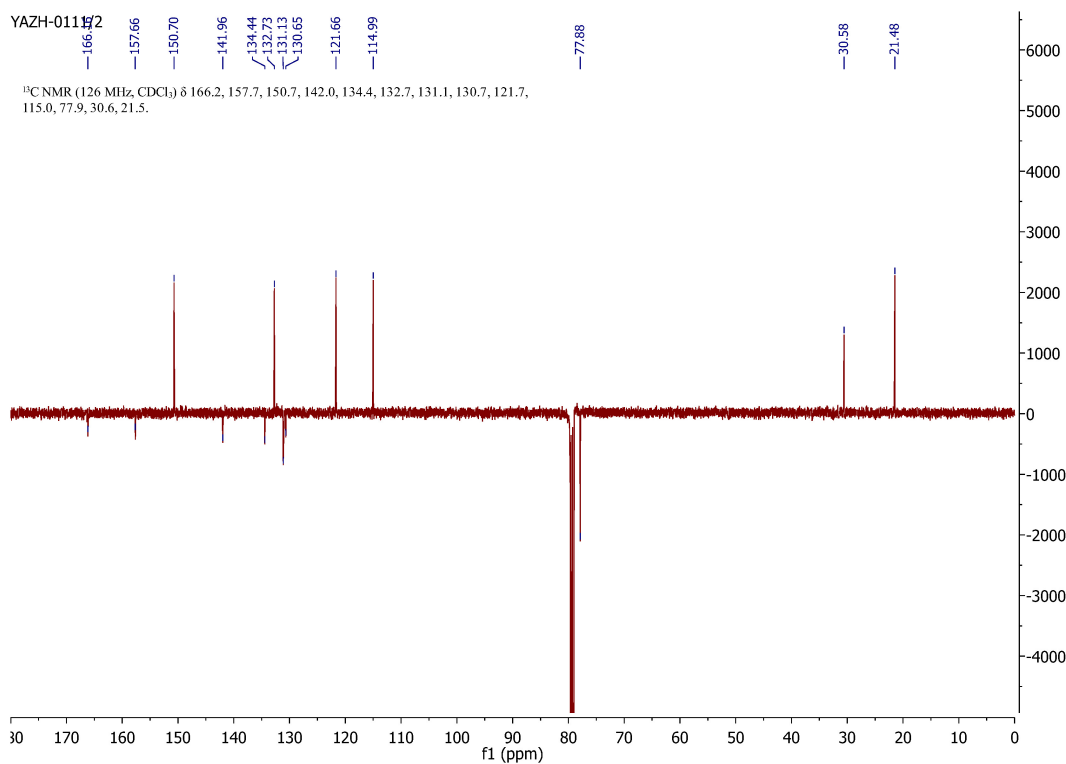

Figure S107  $^{13}\text{C}$  NMR spectrum of compound NPD-1206



Acquired by : Admin  
 Date Acquired : 6/9/2016 2:12:41 PM  
 Sample Name : YAZH-145-2  
 Sample ID :  
 Tray# : 1  
 Vial# : 43  
 Injection Volume : 1  
 Data File : C:\LabSolutions\Data\2016-wk23\YAZH-145-2.lcd  
 Background File : BLANCO 09062016.lcd  
 Method File : Method SCAN ACID standard.lcm  
 Report Format : Default1.CMS.lcr  
 Tuning File : C:\LabSolutions\Tuning\Tuning-ESI-pos-neg01072015a.lct  
 Processed by : Admin  
 Modified Date : 6/9/2016 3:07:45 PM

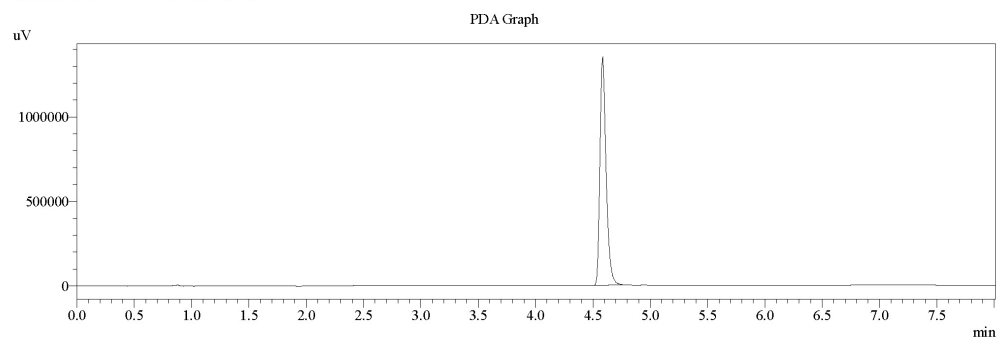

| Peak# | Name | Ret. Time | Area    | Area %  |
|-------|------|-----------|---------|---------|
| 1     |      | 4.579     | 5081780 | 100.000 |

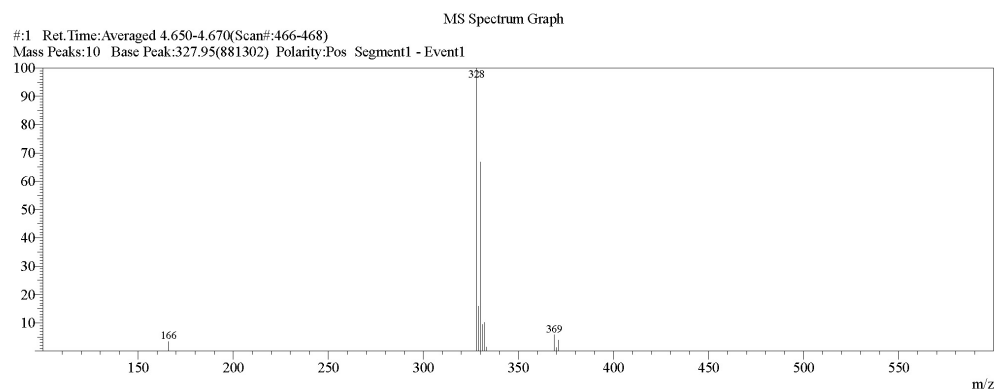

MS Spectrum Table

#1 Ret.Time:  
 BG Mode:Calc 4.540<->4.990(455<->500)

| # | m/z    | Abs.Inten. | Rel.Inten. | Charge | Polarity | Monoisotopic | #  | m/z    | Abs.Inten. | Rel.Inten. | Charge | Polarity | Monoisotopic |
|---|--------|------------|------------|--------|----------|--------------|----|--------|------------|------------|--------|----------|--------------|
| 1 | 165.95 | 29510      | 3.35       |        |          |              | 6  | 332.00 | 89644      | 10.17      |        |          |              |
| 2 | 327.95 | 881302     | 100.00     |        |          |              | 7  | 333.00 | 13321      | 1.51       |        |          |              |
| 3 | 329.00 | 139315     | 15.81      |        |          |              | 8  | 368.95 | 50560      | 5.74       |        |          |              |
| 4 | 329.95 | 589330     | 66.87      |        |          |              | 9  | 370.00 | 10710      | 1.22       |        |          |              |
| 5 | 331.00 | 82638      | 9.38       |        |          |              | 10 | 371.00 | 33942      | 3.85       |        |          |              |

**Figure S108 LCMS spectrum of compound NPD-1472**

YAZH-145.1.fid

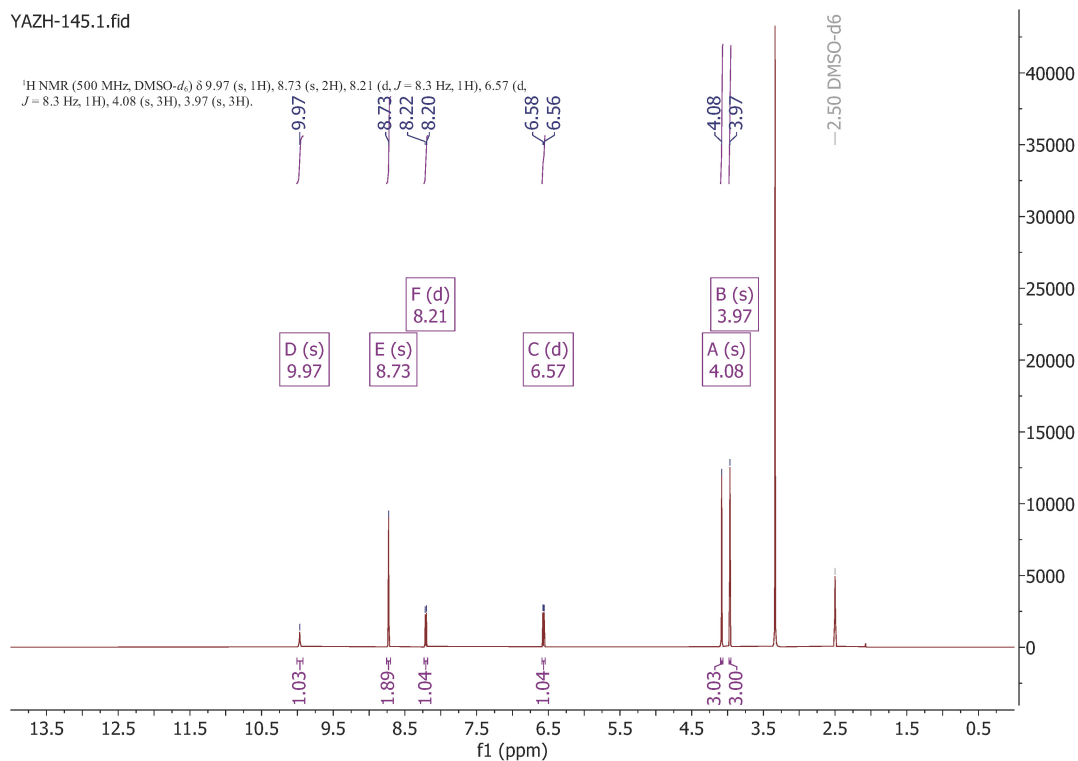

Figure S109 <sup>1</sup>H NMR spectrum of compound NPD-1472

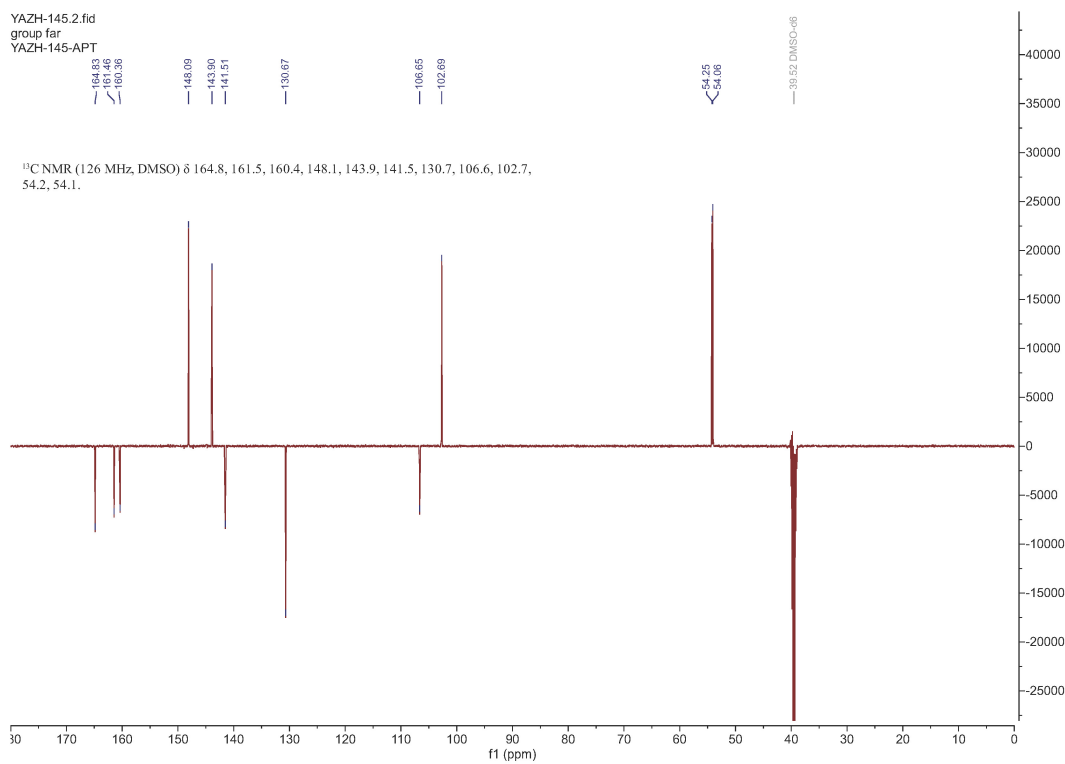

Figure S110 <sup>13</sup>C NMR spectrum of compound NPD-1472

Acquired by : Admin  
 Date Acquired : 10/5/2019 3:59:27 PM  
 Sample Name : YAZH-018  
 Sample ID :  
 Tray# : 1  
 Vial# : 37  
 Injection Volume : 3  
 Data File : C:\LabSolutions\Data\2019\wk19\YAZH-018.lcd  
 Background File : blanco 10052019.lcd  
 Method File : Method SCAN ACID standard.lcm  
 Report Format : DefaultL.CMS.lcr  
 Tuning File : C:\LabSolutions\Tuning\Tuning-ESI-pos-neg01072015a.lct  
 Processed by : Admin  
 Modified Date : 10/5/2019 4:21:59 PM

Medicinal Chemistry  
 Vrije Universiteit Amsterdam

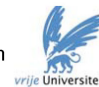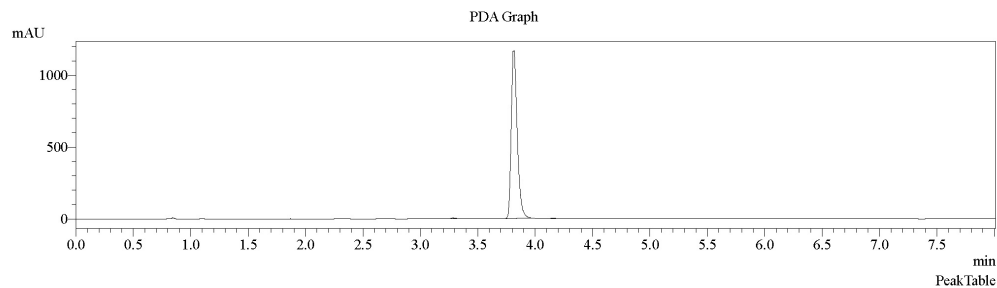

PDA Ch1 254nm 4nm

| Peak# | Name | Ret. Time | Area    | Area % |
|-------|------|-----------|---------|--------|
| 1     |      | 3.281     | 21243   | 0.502  |
| 2     |      | 3.808     | 4200066 | 99.252 |
| 3     |      | 4.153     | 10397   | 0.246  |

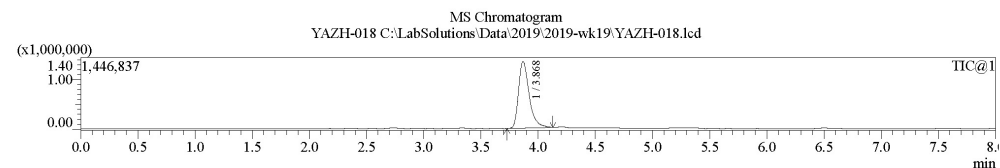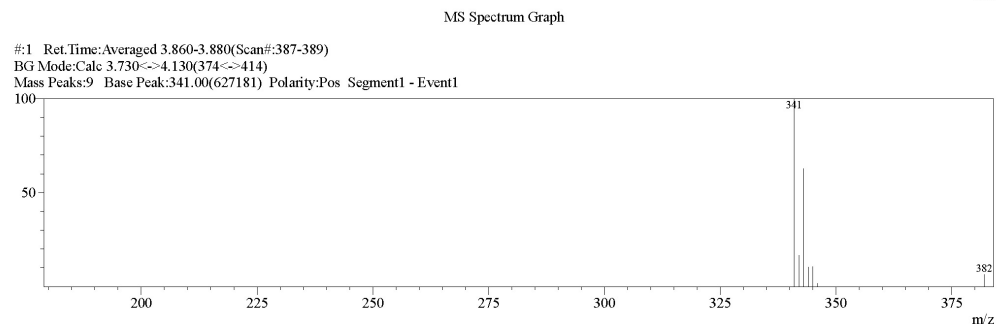

MS Spectrum Table

#1 Ret.Time:  
 BG Mode:Calc 3.730<->4.130(374<->414)  
 Mass Peaks:9 Base Peak:341.00(627181) Polarity:Pos Segment1 - Event1

| # | m/z    | Abs.Inten. | Rel.Inten. | Charge | Polarity | Monoisotopic |
|---|--------|------------|------------|--------|----------|--------------|
| 1 | 179.00 | 23933      | 3.82       |        |          |              |
| 2 | 341.00 | 627181     | 100.00     |        |          |              |
| 3 | 342.05 | 105030     | 16.75      |        |          |              |
| 4 | 343.00 | 394560     | 62.91      |        |          |              |
| 5 | 344.05 | 65299      | 10.41      |        |          |              |
| 6 | 345.05 | 66619      | 10.62      |        |          |              |
| 7 | 346.05 | 11028      | 1.76       |        |          |              |
| 8 | 382.00 | 40100      | 6.39       |        |          |              |
| 9 | 384.05 | 27033      | 4.31       |        |          |              |

Figure S111 LCMS spectrum of compound NPD-2976

YAZH01-018.1.fid

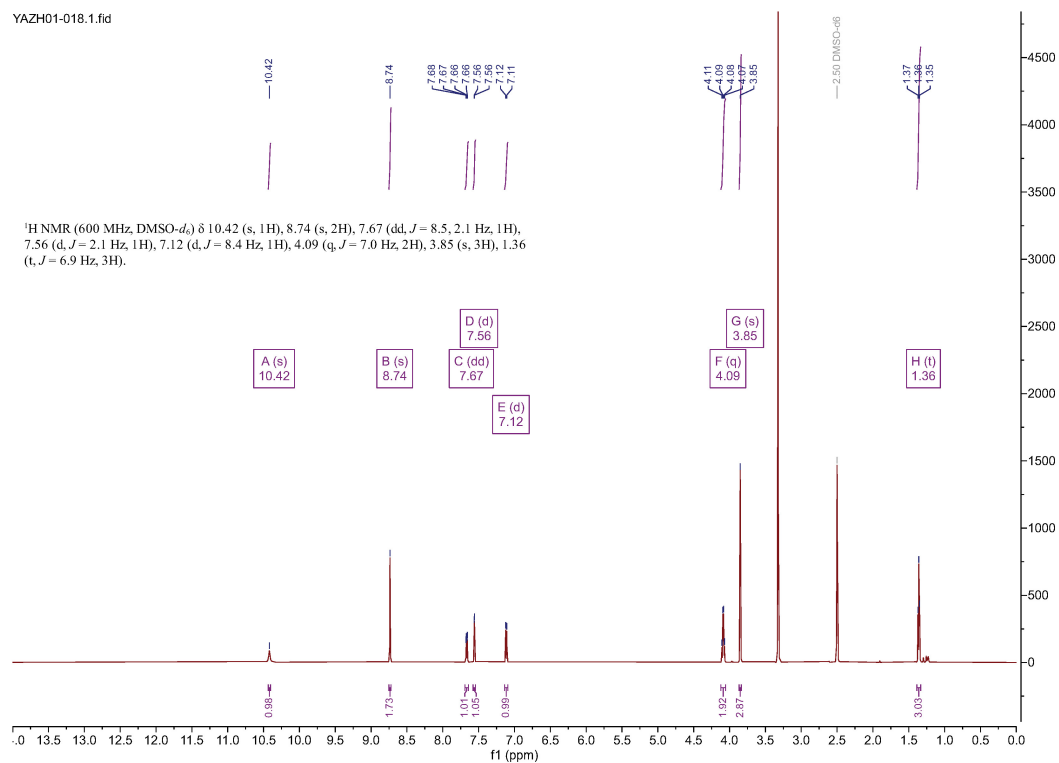Figure S112 <sup>1</sup>H NMR spectrum of compound NPD-2976

YAZH01-018.1.fid

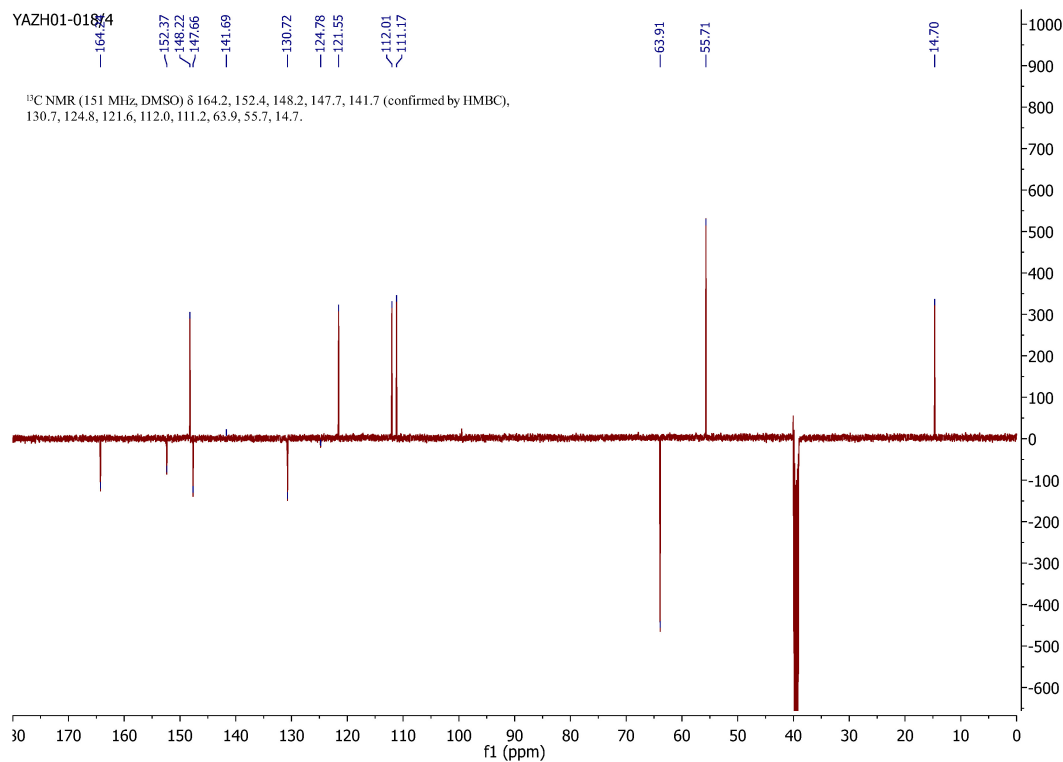Figure S113 <sup>13</sup>C NMR spectrum of compound NPD-2976

Acquired by : Admin  
 Date Acquired : 1/23/2017 10:39:54 AM  
 Sample Name : YAZH01-025  
 Sample ID :  
 Tray# : 1  
 Vial# : 14  
 Injection Volume : 1  
 Data File : C:\LabSolutions\Data\2017\2017-wk04\YAZH01-025.lcd  
 Background File : Blanco23012017.lcd  
 Method File : Method SCAN ACID standard.lcm  
 Report Format : DefaultL.CMS.lcr  
 Tuning File : C:\LabSolutions\Tuning\Tuning-ESI-pos-neg01072015a.lct  
 Processed by : Admin  
 Modified Date : 1/23/2017 11:27:17 AM

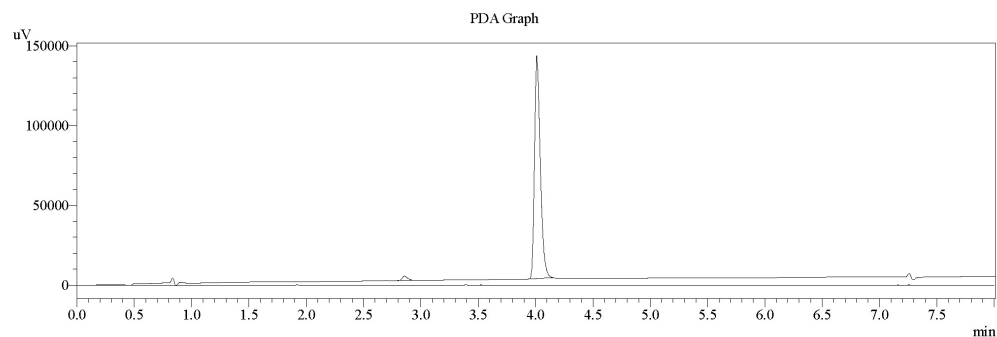

| Peak# | Name | Ret. Time | Area   | Area % |
|-------|------|-----------|--------|--------|
| 1     |      | 2.853     | 9126   | 1.816  |
| 2     |      | 4.007     | 493479 | 98.184 |

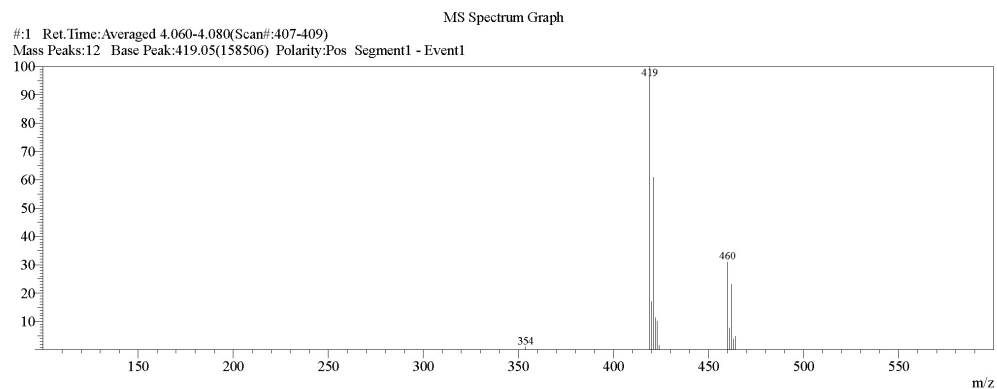

MS Spectrum Table

#1 Ret.Time:  
 BG Mode:Calc 3.960<>4.240(397<>425)

| # | m/z    | Abs.Inten. | Rel.Inten. | Charge | Polarity | Monoisotopic | #  | m/z    | Abs.Inten. | Rel.Inten. | Charge | Polarity | Monoisotopic |
|---|--------|------------|------------|--------|----------|--------------|----|--------|------------|------------|--------|----------|--------------|
| 1 | 353.70 | 1674       | 1.06       |        |          |              | 7  | 424.10 | 2631       | 1.66       |        |          |              |
| 2 | 419.05 | 158506     | 100.00     |        |          |              | 8  | 460.10 | 49139      | 31.00      |        |          |              |
| 3 | 420.15 | 27037      | 17.06      |        |          |              | 9  | 461.15 | 12270      | 7.74       |        |          |              |
| 4 | 421.10 | 96492      | 60.88      |        |          |              | 10 | 462.15 | 36868      | 23.26      |        |          |              |
| 5 | 422.10 | 17895      | 11.29      |        |          |              | 11 | 463.10 | 6115       | 3.86       |        |          |              |
| 6 | 423.00 | 16159      | 10.19      |        |          |              | 12 | 464.15 | 7568       | 4.77       |        |          |              |

Figure S114 LCMS spectrum of compound NPD-2980

YAZH01-025.1.fid

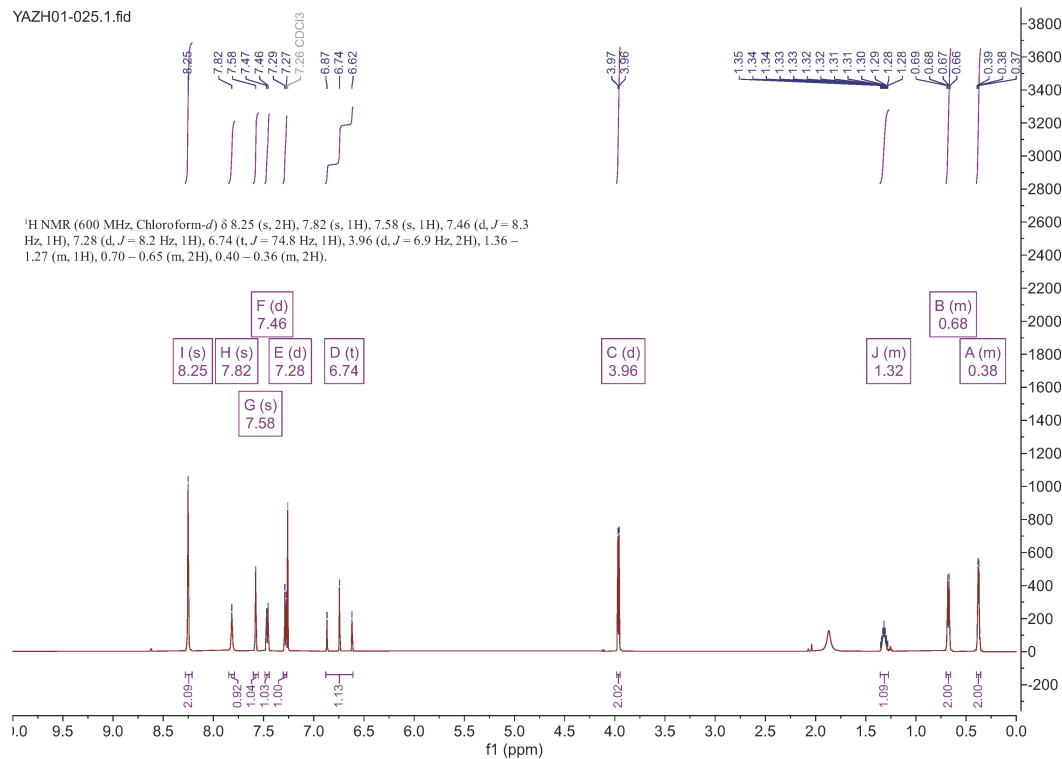Figure S115 <sup>1</sup>H NMR spectrum of compound NPD-2980

YAZH01-025.4.fid

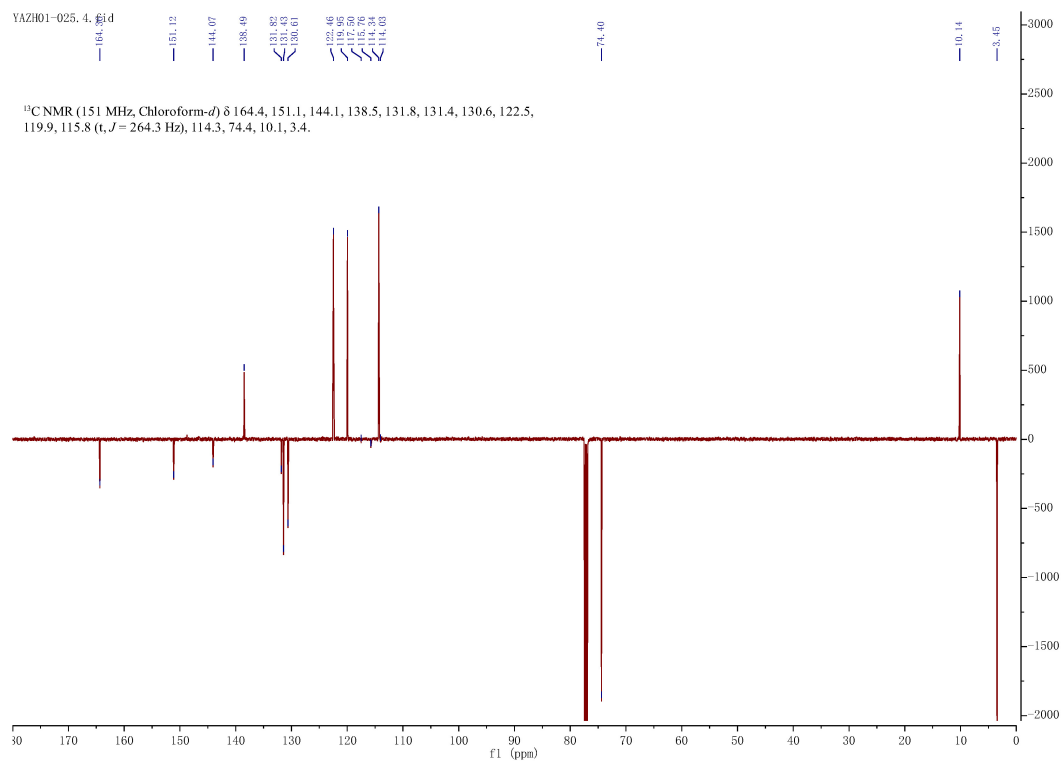Figure S116 <sup>13</sup>C NMR spectrum of compound NPD-2980

Acquired by : Admin  
Date Acquired : 13/5/2019 9:26:18 AM  
Sample Name : YAZH01-027  
Sample ID :  
Tray# : 1  
Vial# : 2  
Injection Volume : 3  
Data File : C:\LabSolutions\Data\2019-wk20\YAZH01-027.lcd  
Background File : blanco 13052019.lcd  
Method File : Method SCAN ACID standard.lcm  
Report Format : DefaultL.CMS.lcr  
Tuning File : C:\LabSolutions\Tuning\Tuning-ESI-pos-neg01072015a.lct  
Processed by : Admin  
Modified Date : 13/5/2019 10:56:18 AM

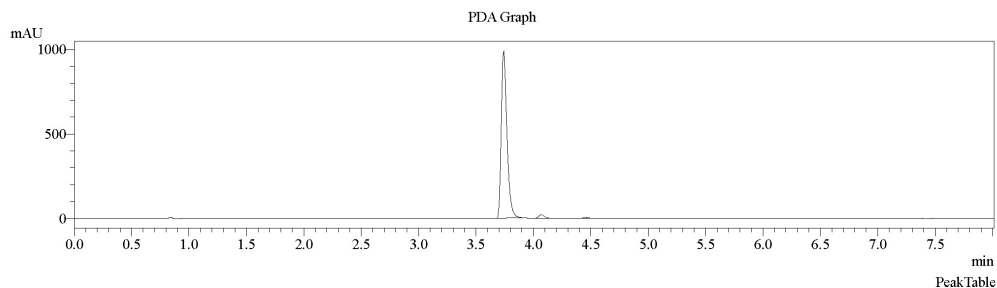

PDA Ch1 254nm 4nm

| Peak# | Name | Ret. Time | Area    | Area % |
|-------|------|-----------|---------|--------|
| 1     |      | 3.232     | 7898    | 0.224  |
| 2     |      | 3.735     | 3426277 | 97.259 |
| 3     |      | 4.061     | 64224   | 1.823  |
| 4     |      | 4.449     | 17567   | 0.499  |
| 5     |      | 4.648     | 2364    | 0.067  |
| 6     |      | 4.853     | 4499    | 0.128  |

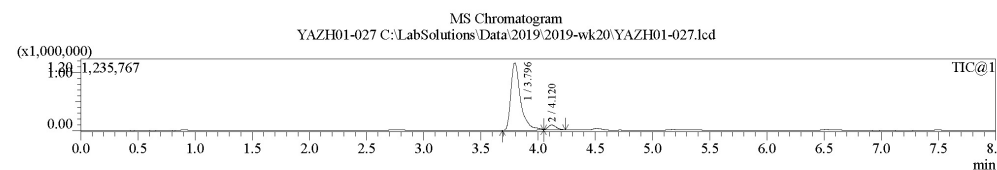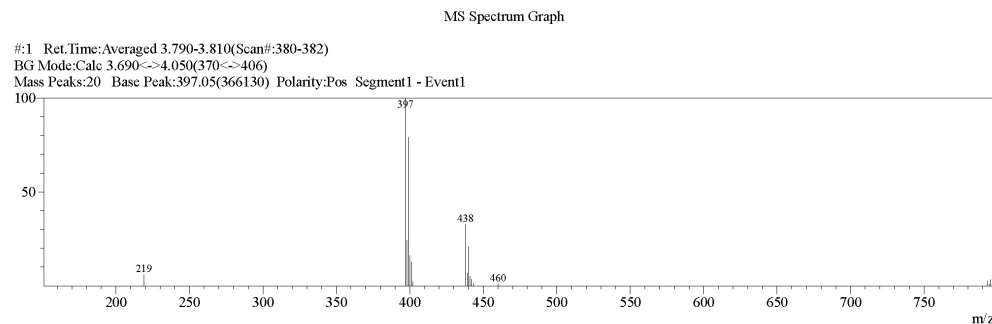

MS Spectrum Table

#1 Ret.Time:  
BG Mode:Calc 3.690<>4.050(370<>406)  
Mass Peaks:20 Base Peak:397.05(366130) Polarity:Pos Segment1 - Event1

| #  | m/z    | Abs.Inten. | Rel.Inten. | Charge | Polarity | Monoisotopic |
|----|--------|------------|------------|--------|----------|--------------|
| 1  | 150.95 | 16336      | 4.46       |        |          |              |
| 2  | 219.10 | 21867      | 5.97       |        |          |              |
| 3  | 397.05 | 366130     | 100.00     |        |          |              |
| 4  | 398.10 | 88607      | 24.20      |        |          |              |
| 5  | 399.10 | 288995     | 78.93      |        |          |              |
| 6  | 400.10 | 58695      | 16.03      |        |          |              |
| 7  | 401.10 | 46866      | 12.80      |        |          |              |
| 8  | 402.10 | 8046       | 2.20       |        |          |              |
| 9  | 438.10 | 120100     | 32.80      |        |          |              |
| 10 | 439.15 | 24040      | 6.57       |        |          |              |
| 11 | 440.15 | 75756      | 20.69      |        |          |              |
| 12 | 441.15 | 18221      | 4.98       |        |          |              |
| 13 | 442.15 | 12605      | 3.44       |        |          |              |
| 14 | 443.20 | 4145       | 1.13       |        |          |              |
| 15 | 460.15 | 3774       | 1.03       |        |          |              |
| 16 | 793.10 | 8735       | 2.39       |        |          |              |
| 17 | 794.30 | 3937       | 1.08       |        |          |              |
| 18 | 795.30 | 12281      | 3.35       |        |          |              |

Figure S117 LCMS spectrum of compound NPD-2981

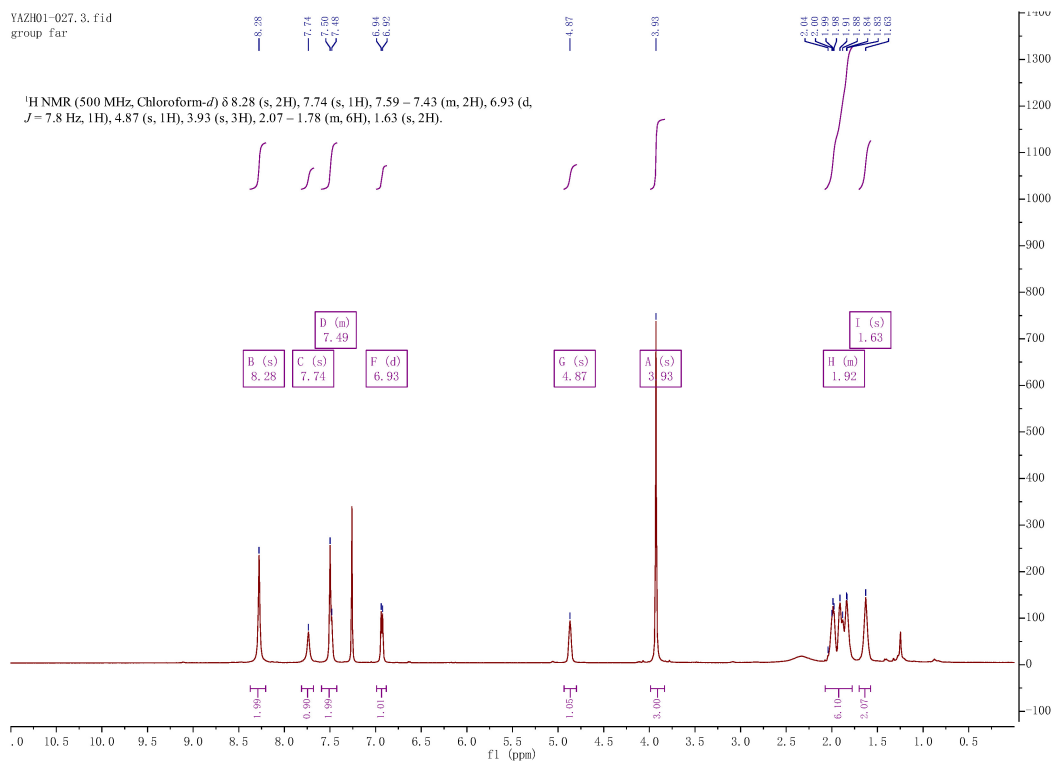

Figure S118  $^1\text{H}$  NMR spectrum of compound NPD-2981

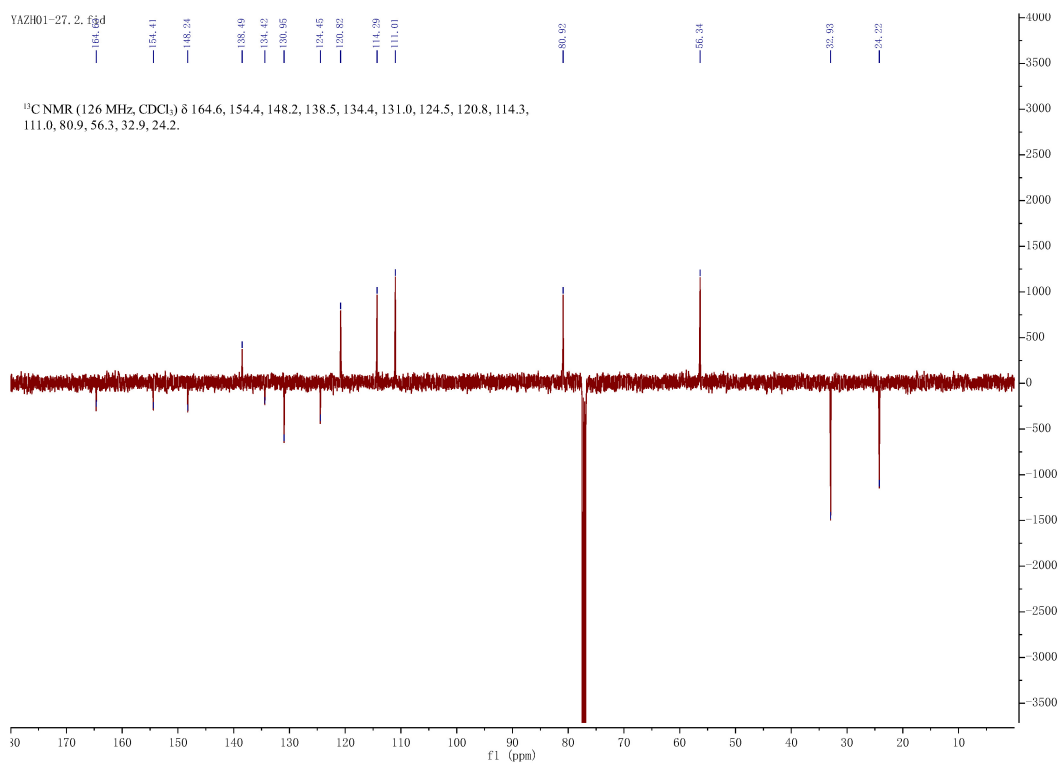

Figure S119  $^{13}\text{C}$  NMR spectrum of compound NPD-2981



Acquired by : Admin  
 Date Acquired : 2/22/2017 9:26:11 AM  
 Sample Name : Practical Course-116  
 Sample ID :  
 Tray# : 1  
 Vial# : 17  
 Injection Volume : 1  
 Data File : C:\LabSolutions\Data\2017\2017-wk08\Practical Course-116.lcd  
 Background File : blanco 22022017.lcd  
 Method File : Method SCAN ACID standard.lcm  
 Report Format : DefaultL.CMS.lcr  
 Tuning File : C:\LabSolutions\Tuning\Tuning-ESI-pos-neg01072015a.lct  
 Processed by : Admin  
 Modified Date : 2/22/2017 11:38:57 AM

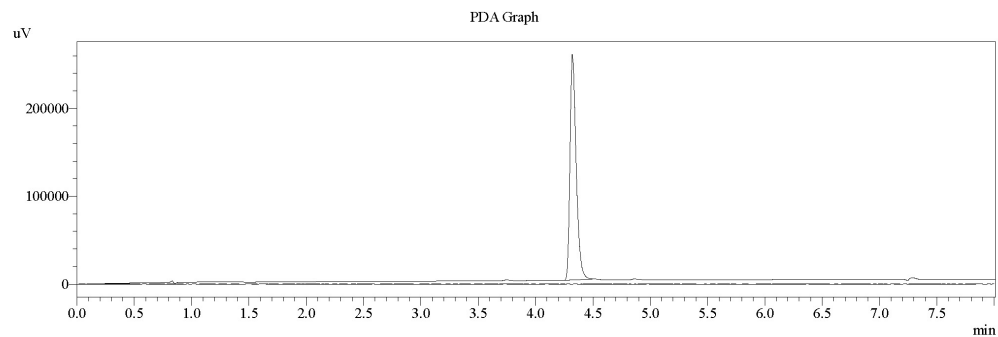

PDA Ch1 254nm 4nm

| Peak# | Name | Ret. Time | Area   | Area %  |
|-------|------|-----------|--------|---------|
| 1     |      | 4.318     | 962680 | 100.000 |

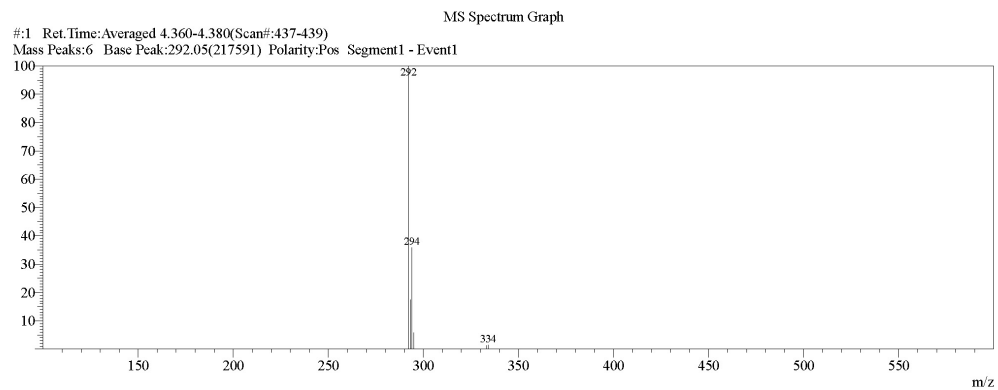

MS Spectrum Table

#1 Ret.Time:  
 BG Mode:Calc 4.270<->4.520(428<->453)  
 Mass Peaks:6 Base Peak:292.05(217591) Polarity:Pos Segment1 - Event1

| # | m/z    | Abs.Inten. | Rel.Inten. | Charge | Polarity | Monoisotopic | # | m/z    | Abs.Inten. | Rel.Inten. | Charge | Polarity | Monoisotopic |
|---|--------|------------|------------|--------|----------|--------------|---|--------|------------|------------|--------|----------|--------------|
| 1 | 292.05 | 217591     | 100.00     |        |          |              | 4 | 295.10 | 12584      | 5.78       |        |          |              |
| 2 | 293.05 | 37967      | 17.45      |        |          |              | 5 | 333.15 | 2847       | 1.31       |        |          |              |
| 3 | 294.05 | 78124      | 35.90      |        |          |              | 6 | 334.20 | 3111       | 1.43       |        |          |              |

**Figure S120 LCMS spectrum of compound NPD-2991**

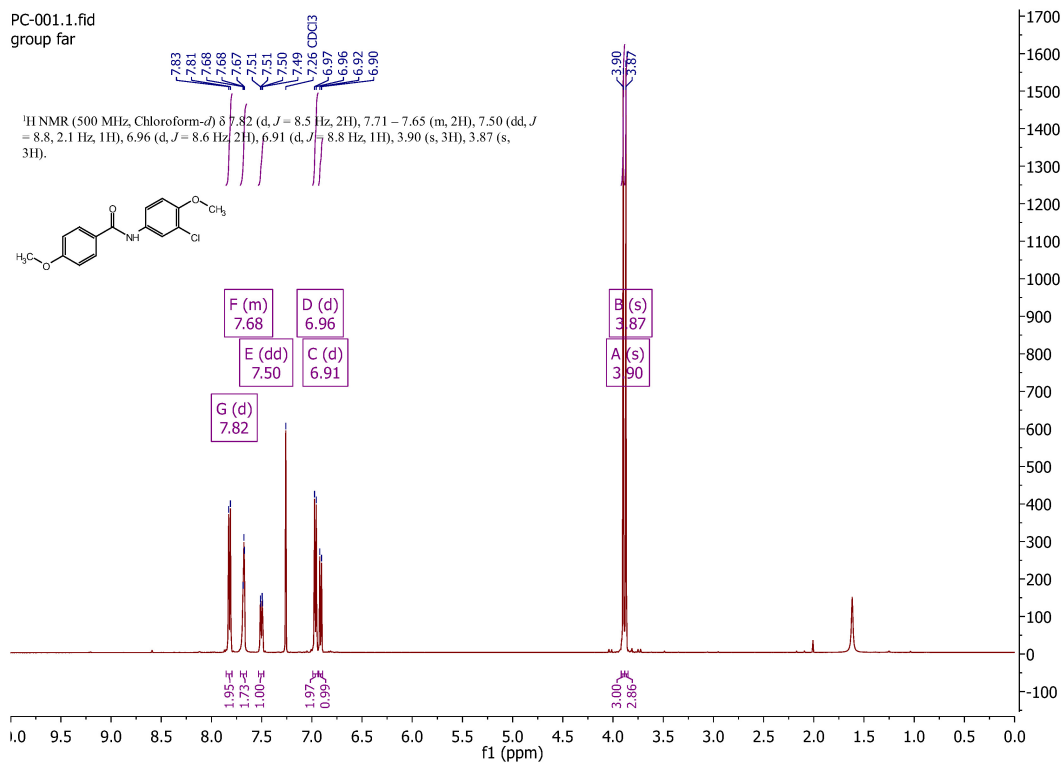

Figure S121 <sup>1</sup>H NMR spectrum of compound NPD-2991

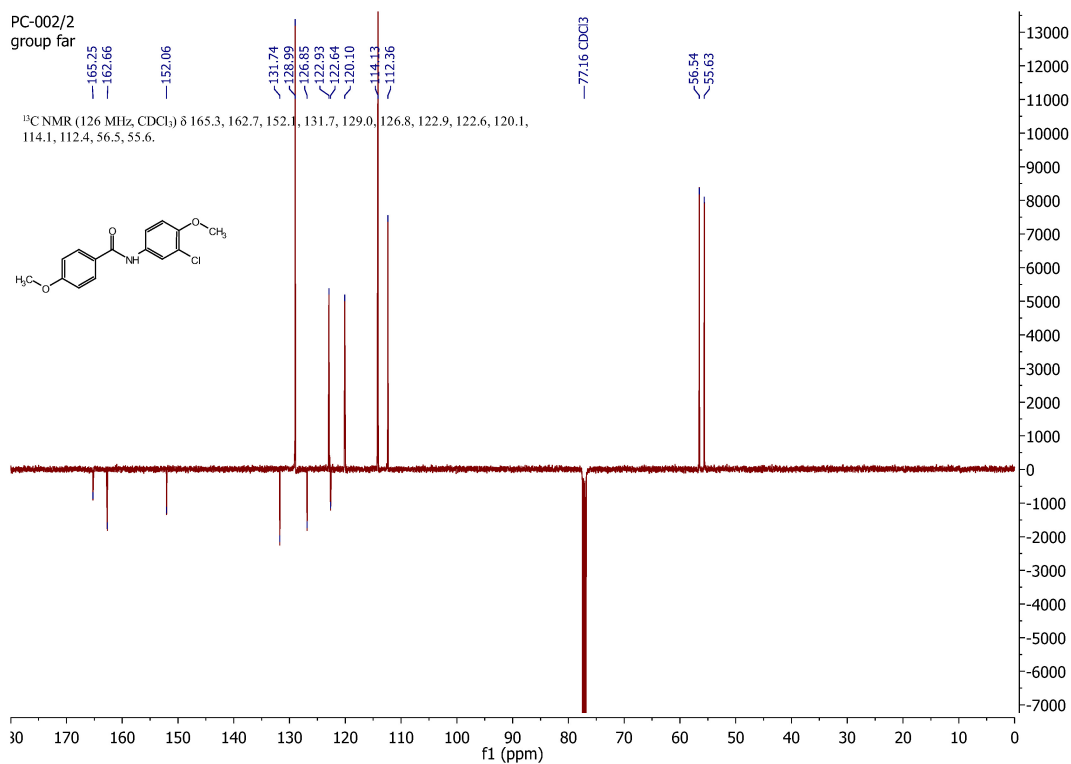

Figure S122 <sup>13</sup>C NMR spectrum of compound NPD-2991

Acquired by : Admin  
 Date Acquired : 2/22/2017 9:34:48 AM  
 Sample Name : Practical Course-118  
 Sample ID :  
 Tray# : 1  
 Vial# : 18  
 Injection Volume : 1  
 Data File : C:\LabSolutions\Data\2017\2017-wk08\Practical Course-118.lcd  
 Background File : blanco 22022017.lcd  
 Method File : Method SCAN ACID standard.lcm  
 Report Format : DefaultL.CMS.lcr  
 Tuning File : C:\LabSolutions\Tuning\Tuning-ESI-pos-neg01072015a.lct  
 Processed by : Admin  
 Modified Date : 2/22/2017 11:39:43 AM

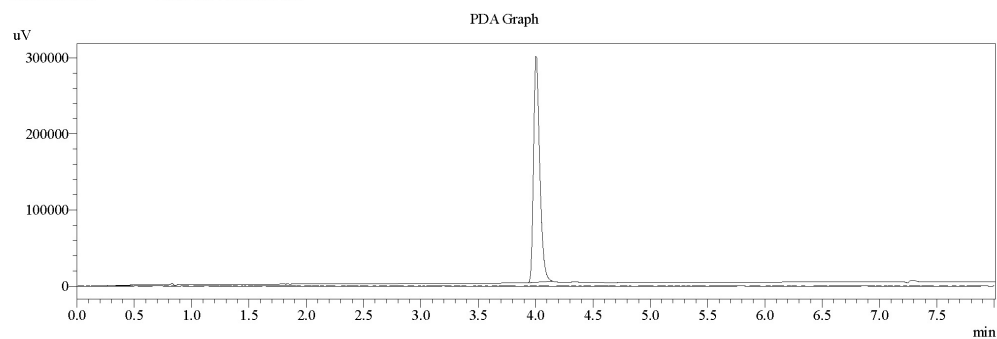

PDA Ch1 254nm 4nm

| Peak# | Name | Ret. Time | Area    | Area %  |
|-------|------|-----------|---------|---------|
| 1     |      | 4.000     | 1123956 | 100.000 |

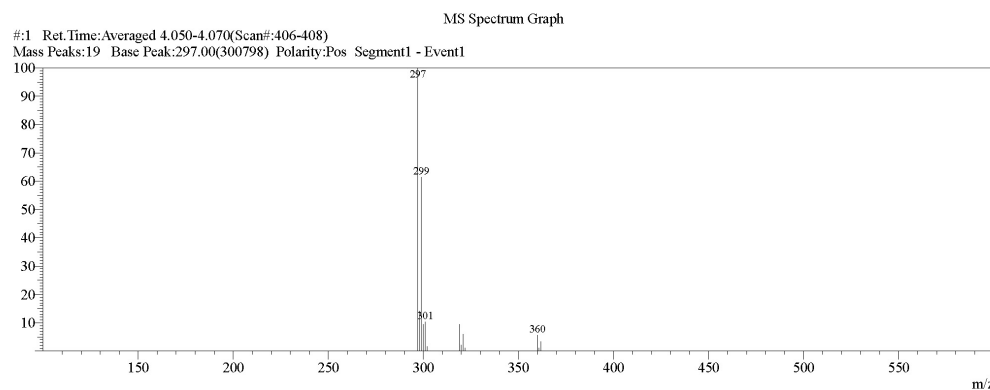

MS Spectrum Table

#1 Ret.Time:  
 BG Mode:Calc 3.930<->4.310(394<->432)  
 Mass Peaks:19 Base Peak:297.00(300798) Polarity:Pos Segment1 - Event1

| # | m/z    | Abs.Inten. | Rel.Inten. | Charge | Polarity | Monoisotopic | #  | m/z    | Abs.Inten. | Rel.Inten. | Charge | Polarity | Monoisotopic |
|---|--------|------------|------------|--------|----------|--------------|----|--------|------------|------------|--------|----------|--------------|
| 1 | 297.00 | 300798     | 100.00     |        |          |              | 10 | 322.00 | 3453       | 1.15       |        |          |              |
| 2 | 298.00 | 42559      | 14.15      |        |          |              | 11 | 360.00 | 17128      | 5.69       |        |          |              |
| 3 | 299.00 | 184817     | 61.44      |        |          |              | 12 | 360.90 | 3156       | 1.05       |        |          |              |
| 4 | 299.95 | 28497      | 9.47       |        |          |              | 13 | 361.95 | 10308      | 3.43       |        |          |              |
| 5 | 301.05 | 30936      | 10.28      |        |          |              | 14 | 615.05 | 9214       | 3.06       |        |          |              |
| 6 | 301.95 | 4667       | 1.55       |        |          |              | 15 | 616.05 | 4246       | 1.41       |        |          |              |
| 7 | 319.00 | 28681      | 9.53       |        |          |              | 16 | 617.00 | 16108      | 5.36       |        |          |              |
| 8 | 320.00 | 6262       | 2.08       |        |          |              | 17 | 618.00 | 4738       | 1.58       |        |          |              |
| 9 | 320.95 | 17935      | 5.96       |        |          |              | 18 | 619.05 | 6994       | 2.33       |        |          |              |

**Figure S123 LCMS spectrum of compound NPD-2992**

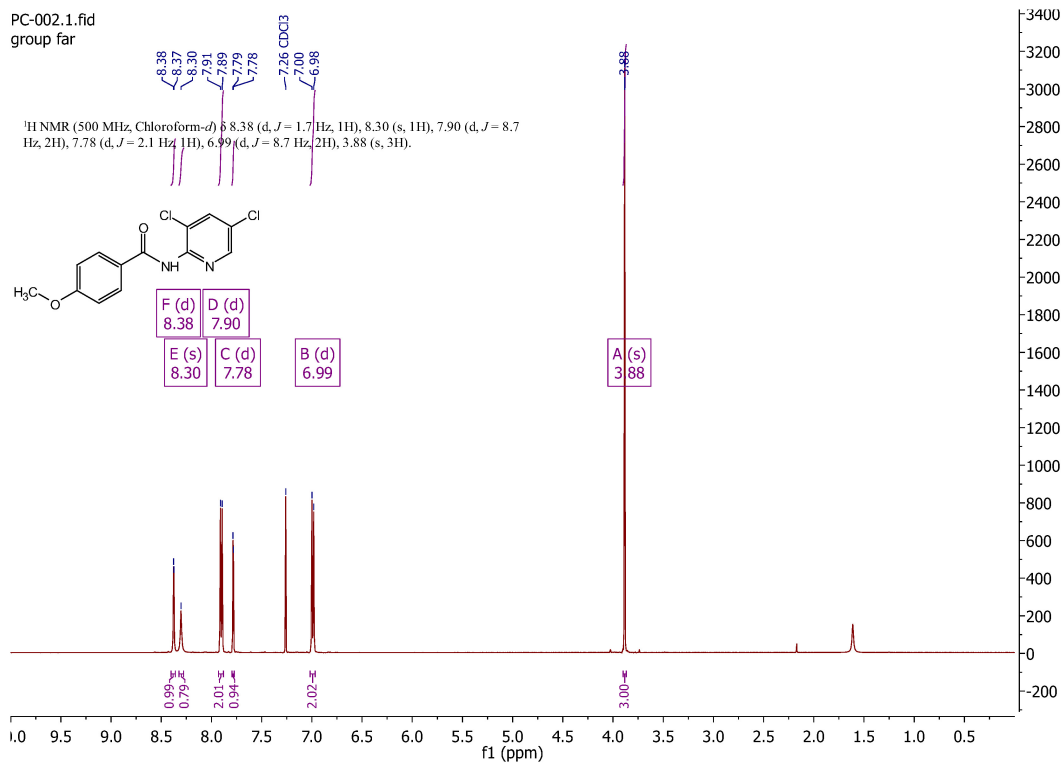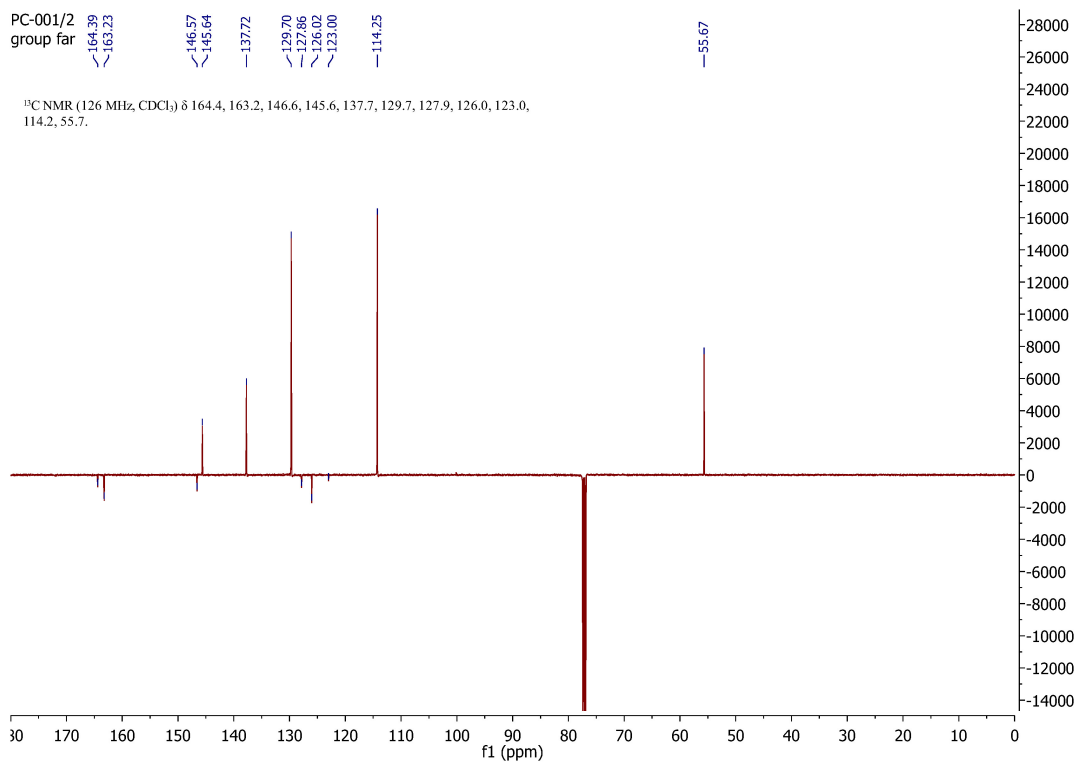

Acquired by : Admin  
 Date Acquired : 2/22/2017 12:37:37 PM  
 Sample Name : Practical Course-121-1  
 Sample ID :  
 Tray# : 1  
 Vial# : 37  
 Injection Volume : 1  
 Data File : C:\LabSolutions\Data\2017\2017-wk08\Practical Course-121-1.lcd  
 Background File : blanco 22022017.lcd  
 Method File : Method SCAN.ACID standard.lcm  
 Report Format : DefaultLCMS.lcr  
 Tuning File : C:\LabSolutions\Tuning\Tuning-ESI-pos-neg01072015a.lct  
 Processed by : Admin  
 Modified Date : 2/22/2017 1:42:04 PM

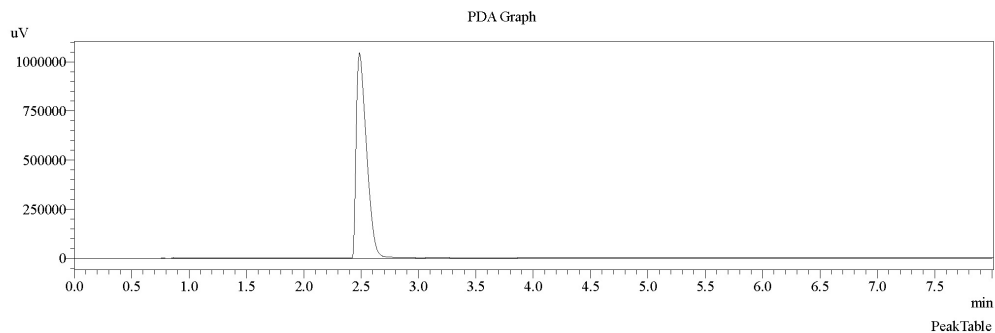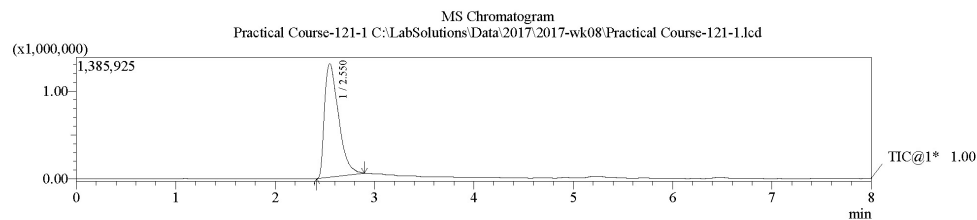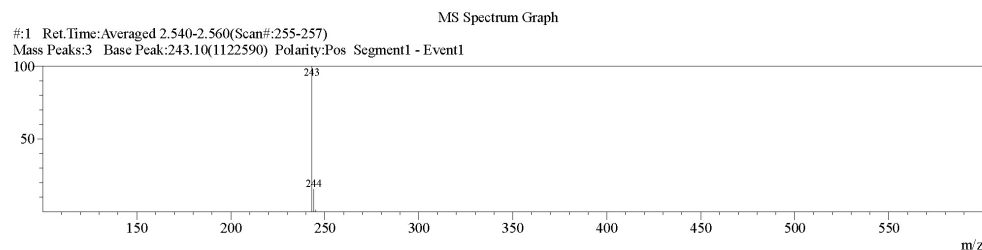

MS Spectrum Table

#1 Ret.Time:  
 BG Mode:Calc 2.420<->2.900(243<->291)

| # | m/z    | Abs.Inten. | Rel.Inten. | Charge | Polarity | Monoisotopic | # | m/z    | Abs.Inten. | Rel.Inten. | Charge | Polarity | Monoisotopic |
|---|--------|------------|------------|--------|----------|--------------|---|--------|------------|------------|--------|----------|--------------|
| 1 | 243.10 | 1122590    | 100.00     |        |          |              | 3 | 245.10 | 14910      | 1.33       |        |          |              |
| 2 | 244.10 | 172408     | 15.36      |        |          |              |   |        |            |            |        |          |              |

**Figure S126 LCMS spectrum of compound NPD-2993**

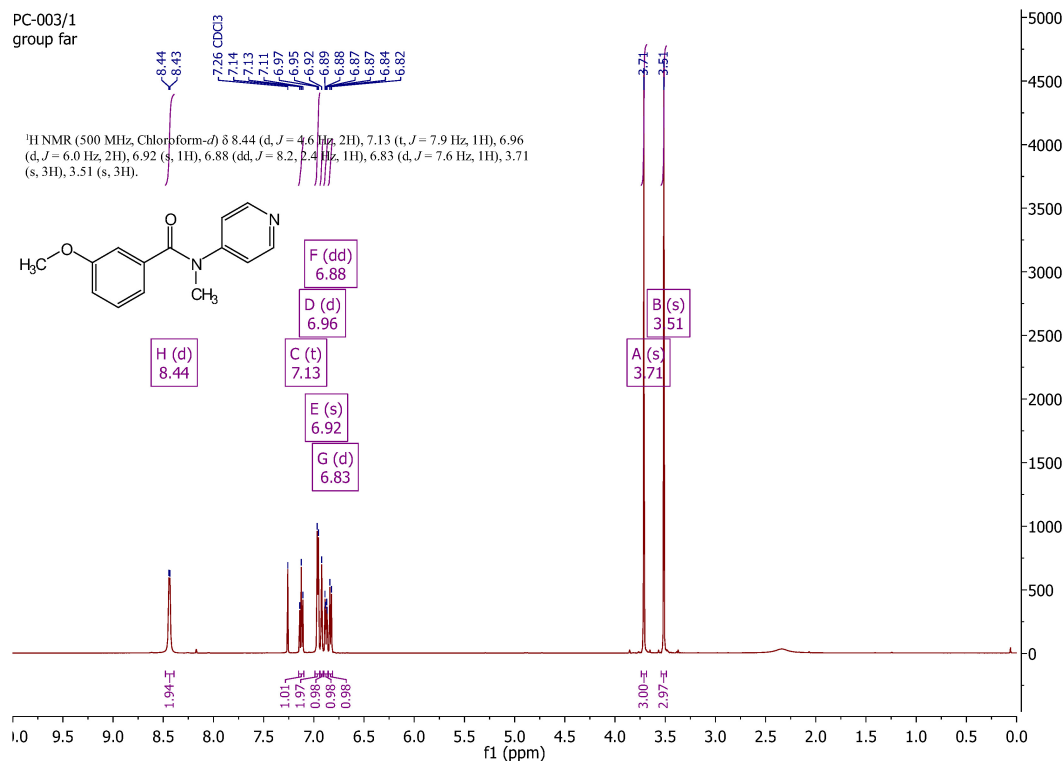

Figure S127 <sup>1</sup>H NMR spectrum of compound NPD-2993

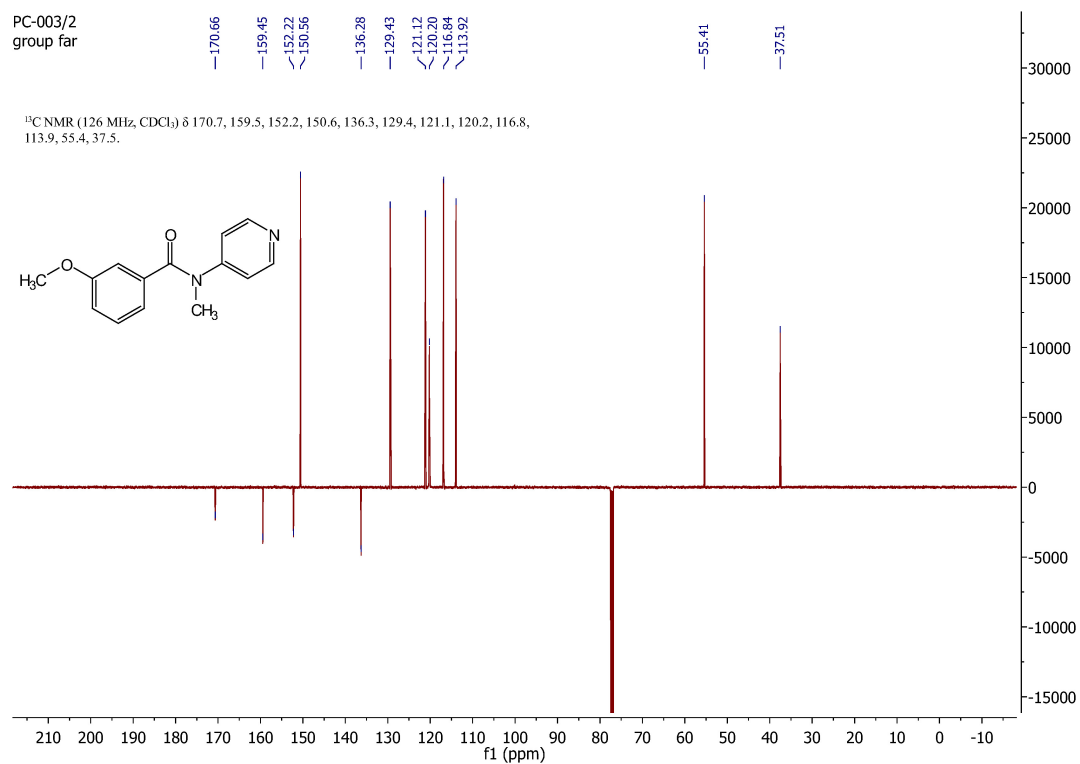

Figure S128 <sup>13</sup>C NMR spectrum of compound NPD-2993

Acquired by : Admin  
 Date Acquired : 2/22/2017 10:43:59 AM  
 Sample Name : Practical Course-123  
 Sample ID :  
 Tray# : 1  
 Vial# : 27  
 Injection Volume : 1  
 Data File : C:\LabSolutions\Data\2017\2017-wk08\Practical Course-123.lcd  
 Background File : blanco 22022017.lcd  
 Method File : Method SCAN ACID standard.lcm  
 Report Format : DefaultL.CMS.lcr  
 Tuning File : C:\LabSolutions\Tuning\Tuning-ESI-pos-neg01072015a.lct  
 Processed by : Admin  
 Modified Date : 2/22/2017 11:41:14 AM

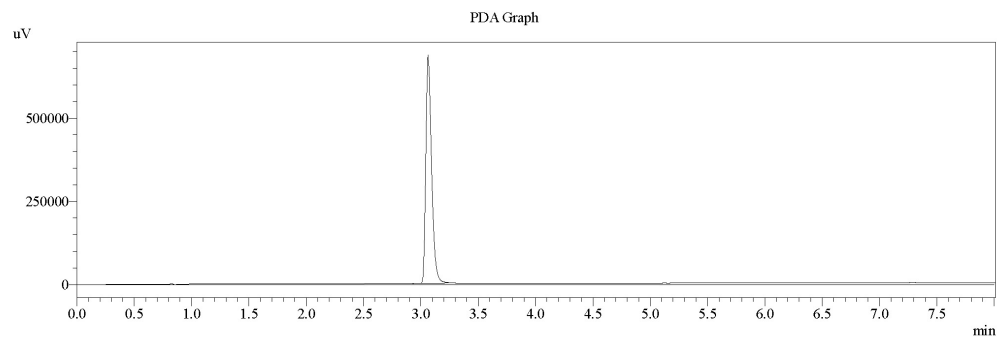

PDA Ch1 254nm 4nm

| Peak# | Name | Ret. Time | Area    | Area %  |
|-------|------|-----------|---------|---------|
| 1     |      | 3.059     | 2366839 | 100.000 |

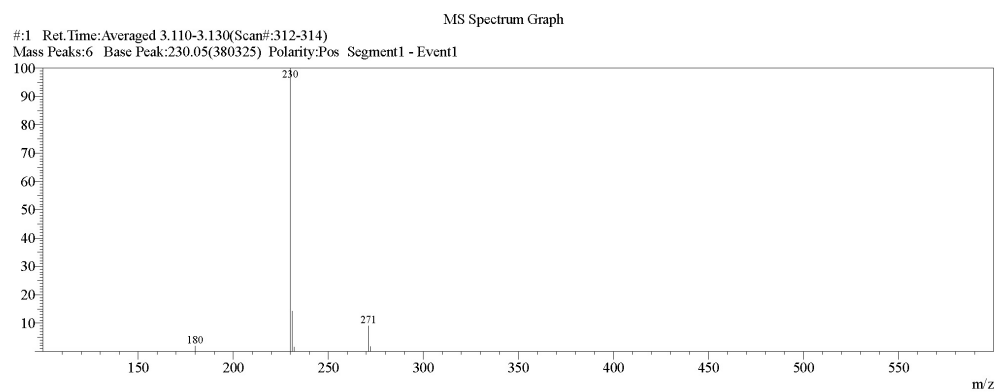

MS Spectrum Table

#1 Ret.Time:  
 BG Mode:Calc 3.010<->3.190(302<->320)  
 Mass Peaks:6 Base Peak:230.05(380325) Polarity:Pos Segment1 - Event1

| # | m/z    | Abs.Inten. | Rel.Inten. | Charge | Polarity | Monoisotopic | # | m/z    | Abs.Inten. | Rel.Inten. | Charge | Polarity | Monoisotopic |
|---|--------|------------|------------|--------|----------|--------------|---|--------|------------|------------|--------|----------|--------------|
| 1 | 180.00 | 7033       | 1.85       |        |          |              | 4 | 232.00 | 5927       | 1.56       |        |          |              |
| 2 | 230.05 | 380325     | 100.00     |        |          |              | 5 | 271.10 | 34608      | 9.10       |        |          |              |
| 3 | 231.05 | 53980      | 14.19      |        |          |              | 6 | 272.10 | 6395       | 1.68       |        |          |              |

**Figure S129 LCMS spectrum of compound NPD-2994**

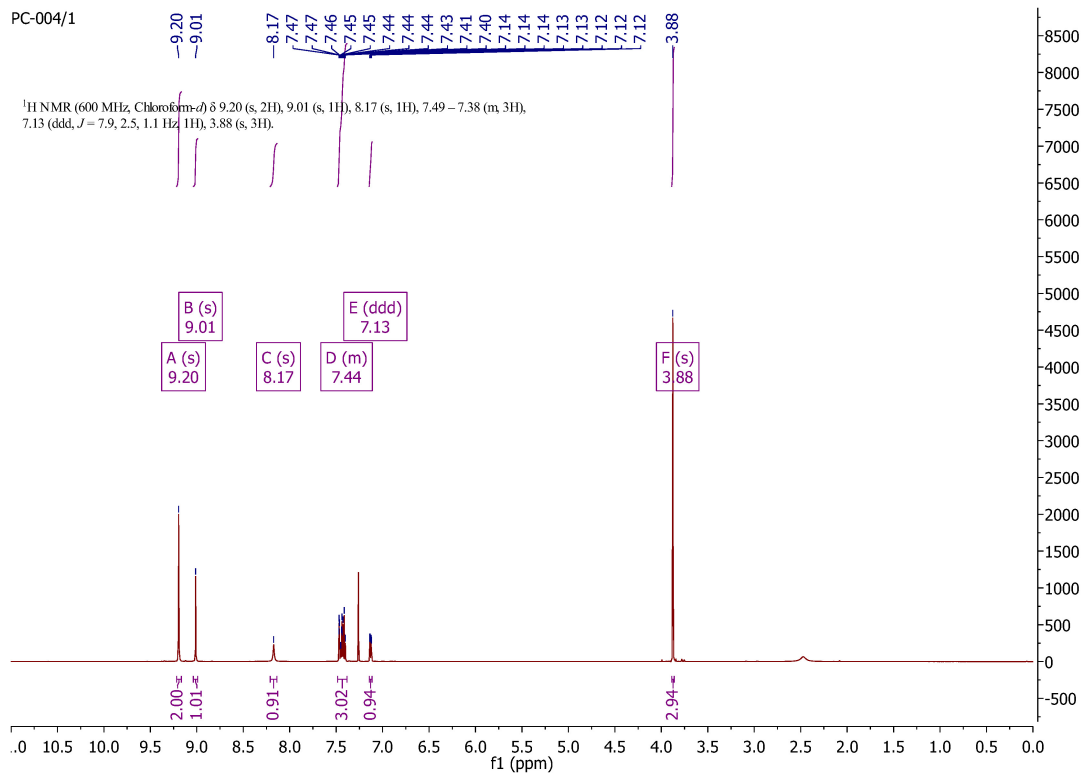

Figure S130 <sup>1</sup>H NMR spectrum of compound NPD-2994

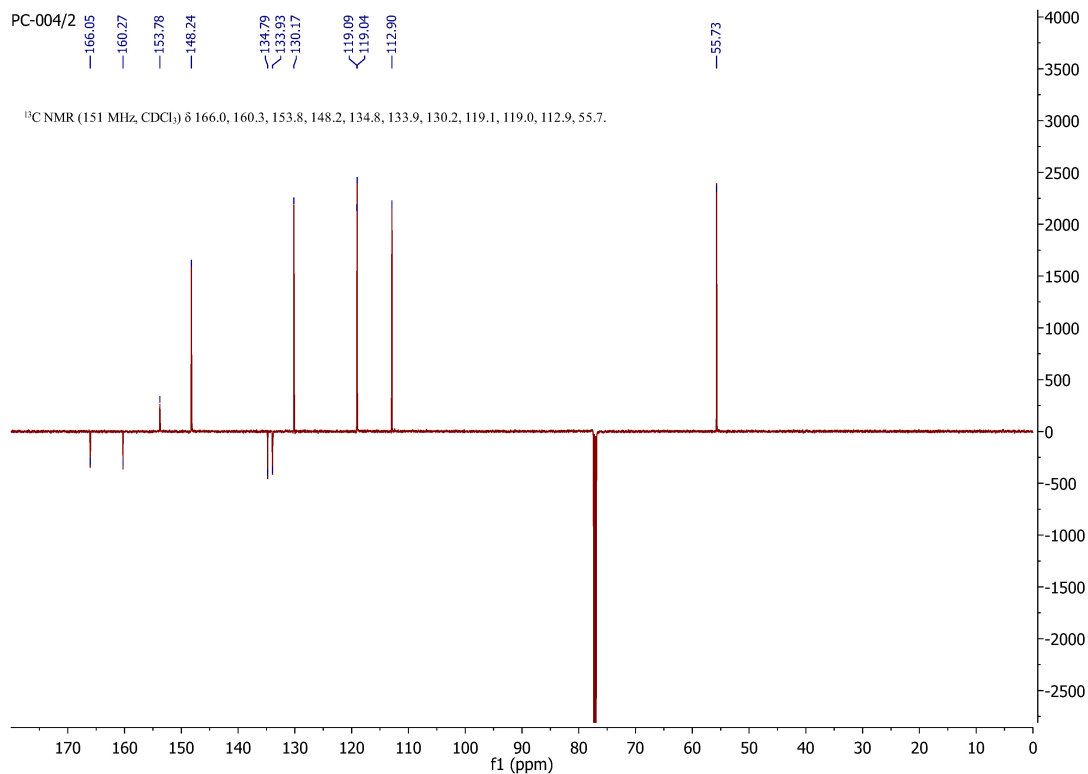

Figure S131 <sup>13</sup>C NMR spectrum of compound NPD-2994



Acquired by : Admin  
 Date Acquired : 2/22/2017 11:01:15 AM  
 Sample Name : PC-1289  
 Sample ID :  
 Tray# : 1  
 Vial# : 28  
 Injection Volume : 1  
 Data File : C:\LabSolutions\Data\2017\2017-wk08\PC-129.lcd  
 Background File : blanco 22022017.lcd  
 Method File : Method SCAN ACID standard.lcm  
 Report Format : DefaultLCMS.lcr  
 Tuning File : C:\LabSolutions\Tuning\Tuning-ESI-pos-neg01072015a.lct  
 Processed by : Admin  
 Modified Date : 2/22/2017 11:34:19 AM

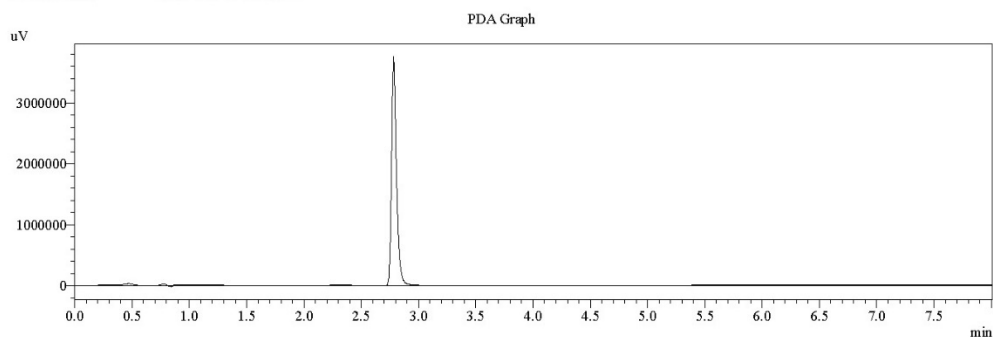

PDA Ch1 230nm 4nm

| Peak# | Name | Ret. Time | Area     | Area%   |
|-------|------|-----------|----------|---------|
| 1     |      | 2.778     | 11122396 | 100.000 |

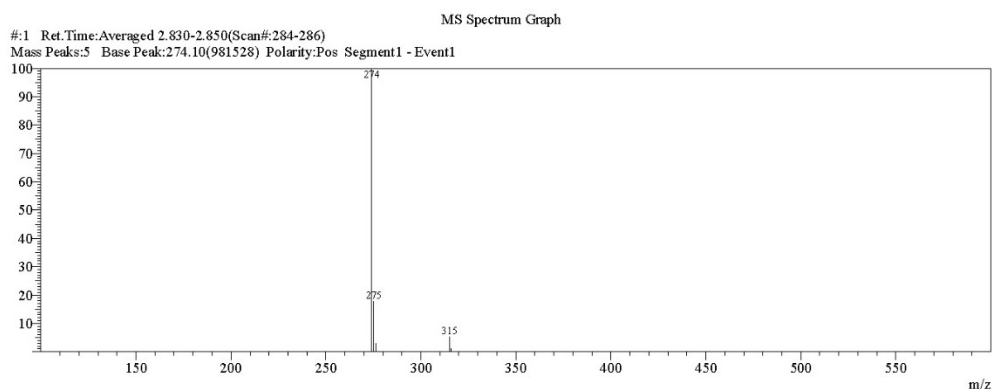

MS Spectrum Table

#1 Ret.Time:  
 BG Mode:Calc 2.730<->3.100(274<->311)

| # | m/z    | Abs.Inten. | Rel.Inten. | Charge | Polarity | Monoisotopic | # | m/z    | Abs.Inten. | Rel.Inten. | Charge | Polarity | Monoisotopic |
|---|--------|------------|------------|--------|----------|--------------|---|--------|------------|------------|--------|----------|--------------|
| 1 | 274.10 | 981528     | 100.00     |        |          |              | 4 | 315.10 | 50688      | 5.16       |        |          |              |
| 2 | 275.15 | 173963     | 17.72      |        |          |              | 5 | 316.10 | 11287      | 1.15       |        |          |              |
| 3 | 276.10 | 28897      | 2.94       |        |          |              |   |        |            |            |        |          |              |

Figure S132 LCMS spectrum of compound NPD-2995

PC-005/1  
group far

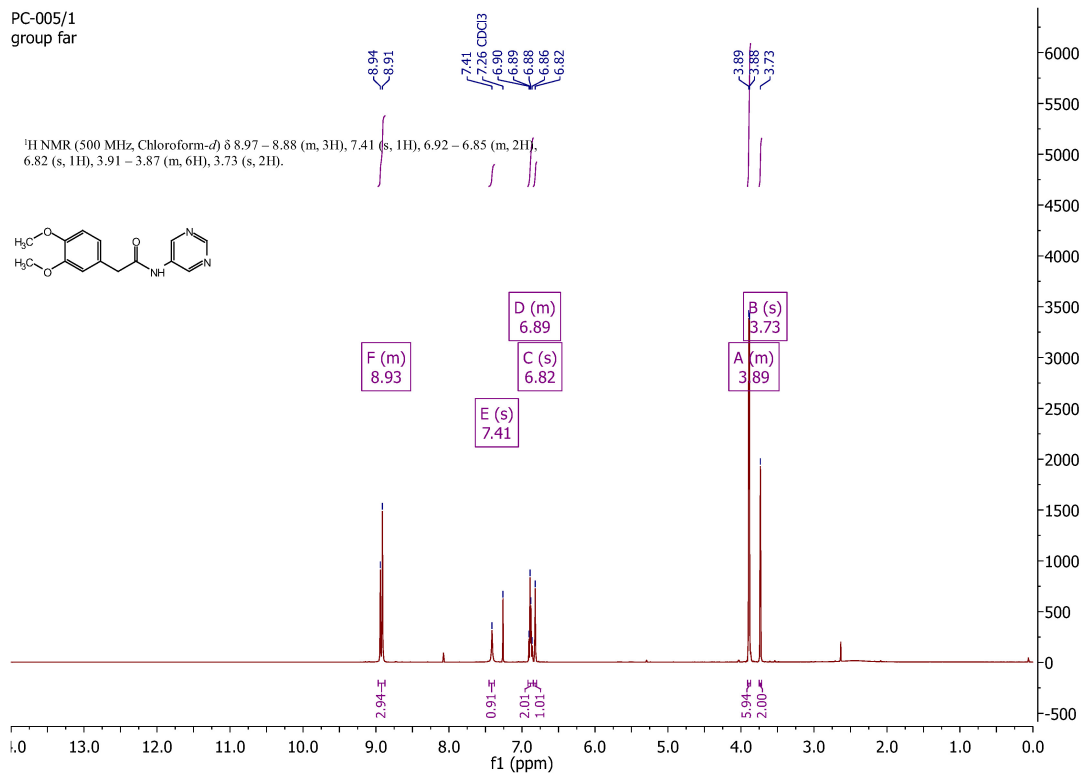

Figure S133 <sup>1</sup>H NMR spectrum of compound NPD-2995

PC-005/2  
group far

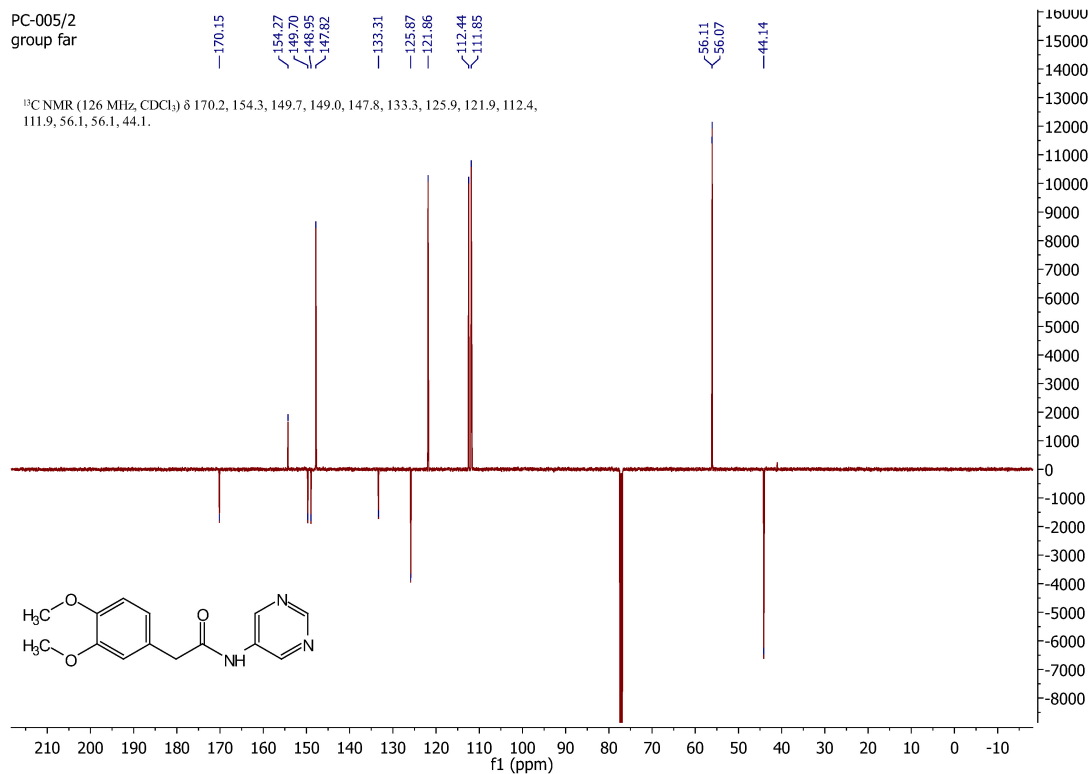

Figure S134 <sup>13</sup>C NMR spectrum of compound NPD-2995

Acquired by : Admin  
 Date Acquired : 2/22/2017 11:09:52 AM  
 Sample Name : PC-131  
 Sample ID :  
 Tray# : 1  
 Vial# : 29  
 Injection Volume : 1  
 Data File : C:\LabSolutions\Data\2017\2017-wk08\PC-131.Lcd  
 Background File : blanco 22022017.lcd  
 Method File : Method SCAN ACID standard.lcm  
 Report Format : DefaultLCMS.lcr  
 Tuning File : C:\LabSolutions\Tuning\Tuning-ESI-pos-neg01072015a.lct  
 Processed by : Admin  
 Modified Date : 2/22/2017 11:38:30 AM

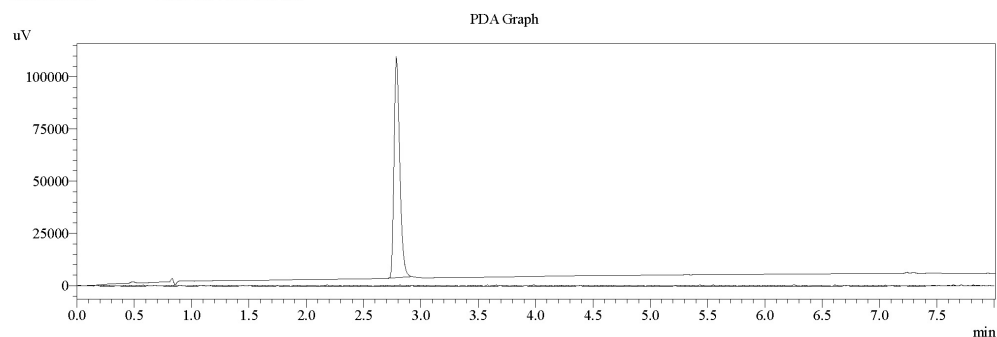

PDA Ch1 254nm 4nm

| Peak# | Name | Ret. Time | Area   | Area %  |
|-------|------|-----------|--------|---------|
| 1     |      | 2.782     | 364495 | 100.000 |

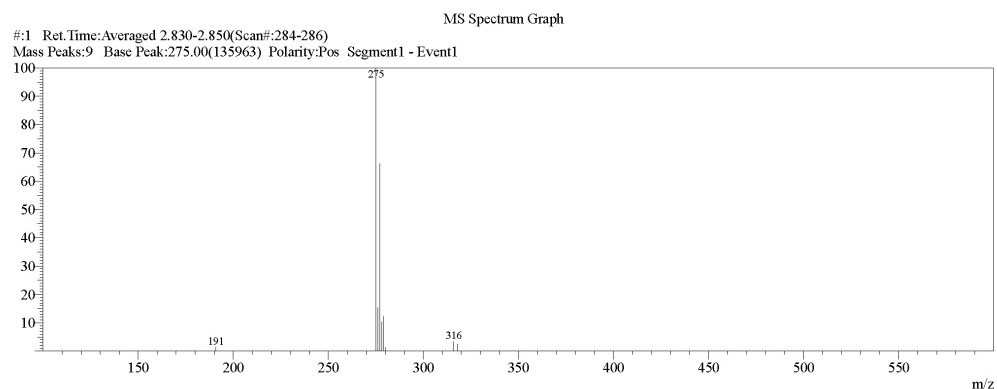

#1 Ret.Time:  
 BG Mode:Calc 2.730<->3.000(274<->301)

Mass Peaks:9 Base Peak:275.00(135963) Polarity:Pos Segment1 - Event1

| # | m/z    | Abs.Inten. | Rel.Inten. | Charge | Polarity | Monoisotopic | # | m/z    | Abs.Inten. | Rel.Inten. | Charge | Polarity | Monoisotopic |
|---|--------|------------|------------|--------|----------|--------------|---|--------|------------|------------|--------|----------|--------------|
| 1 | 190.95 | 1918       | 1.41       |        |          |              | 6 | 279.00 | 16514      | 12.15      |        |          |              |
| 2 | 275.00 | 135963     | 100.00     |        |          |              | 7 | 280.15 | 1778       | 1.31       |        |          |              |
| 3 | 276.00 | 20916      | 15.38      |        |          |              | 8 | 316.10 | 4588       | 3.37       |        |          |              |
| 4 | 277.00 | 90163      | 66.31      |        |          |              | 9 | 318.10 | 3465       | 2.55       |        |          |              |
| 5 | 278.05 | 13972      | 10.28      |        |          |              |   |        |            |            |        |          |              |

Figure S135 LCMS spectrum of compound NPD-2996

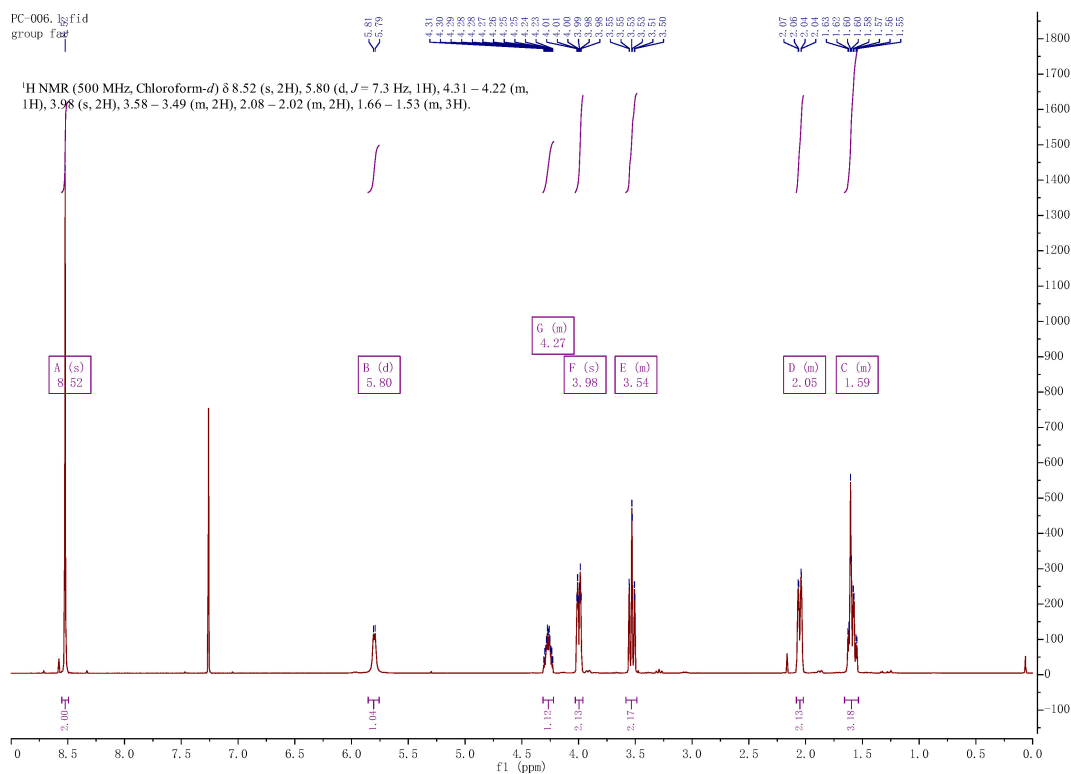

Figure S136 <sup>1</sup>H NMR spectrum of compound NPD-2996

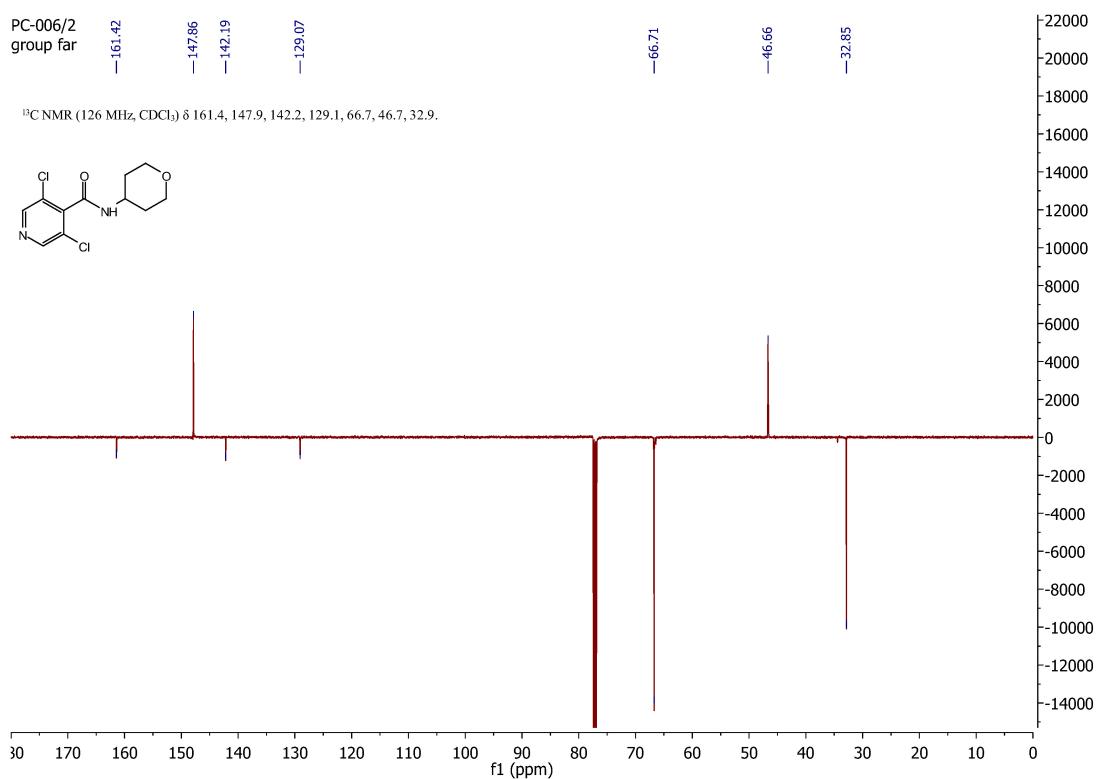

Figure S137 <sup>13</sup>C NMR spectrum of compound NPD-2996

Acquired by : Admin  
 Date Acquired : 2/22/2017 12:11:00 PM  
 Sample Name : PC-134  
 Sample ID :  
 Tray# : 1  
 Vial# : 35  
 Injection Volume : 1  
 Data File : C:\LabSolutions\Data\2017\2017-wk08\PC-134.lcd  
 Background File : blanco 22022017.lcd  
 Method File : Method SCAN ACID standard.lcm  
 Report Format : DefaultL.CMS.lcr  
 Tuning File : C:\LabSolutions\Tuning\Tuning-ESI-pos-neg01072015a.lct  
 Processed by : Admin  
 Modified Date : 2/22/2017 1:42:58 PM

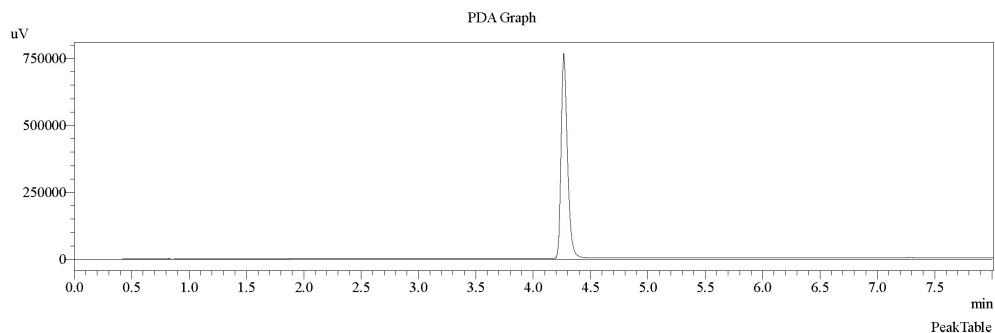

PDA Ch1 254nm 4nm

| Peak# | Name | Ret. Time | Area    | Area %  |
|-------|------|-----------|---------|---------|
| 1     |      | 4.262     | 2880432 | 100.000 |

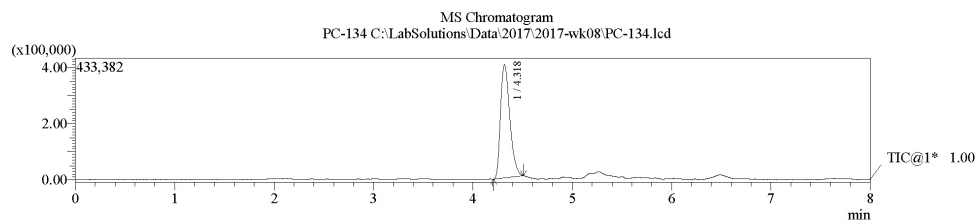

MS Spectrum Graph

#1 Ret.Time:Averaged 4.310-4.330(Scan#:432-434)

Mass Peaks:15 Base Peak:330.95(137025) Polarity:Pos Segment1 - Event1

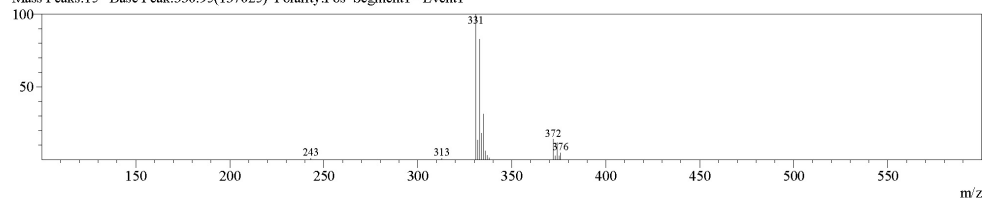

MS Spectrum Table

#1 Ret.Time:

BG Mode:Calc 4.210<->4.510(422<->452)

Mass Peaks:15 Base Peak:330.95(137025) Polarity:Pos Segment1 - Event1

| # | m/z    | Abs.Inten. | Rel.Inten. | Charge | Polarity | Monoisotopic | #  | m/z    | Abs.Inten. | Rel.Inten. | Charge | Polarity | Monoisotopic |
|---|--------|------------|------------|--------|----------|--------------|----|--------|------------|------------|--------|----------|--------------|
| 1 | 243.10 | 1560       | 1.14       |        |          |              | 9  | 336.90 | 4317       | 3.15       |        |          |              |
| 2 | 312.80 | 1561       | 1.14       |        |          |              | 10 | 337.90 | 1887       | 1.38       |        |          |              |
| 3 | 330.95 | 137025     | 100.00     |        |          |              | 11 | 372.00 | 19257      | 14.05      |        |          |              |
| 4 | 332.00 | 18575      | 13.56      |        |          |              | 12 | 373.00 | 3712       | 2.71       |        |          |              |
| 5 | 332.95 | 113425     | 82.78      |        |          |              | 13 | 374.00 | 16322      | 11.91      |        |          |              |
| 6 | 334.00 | 25041      | 18.27      |        |          |              | 14 | 375.00 | 3773       | 2.75       |        |          |              |
| 7 | 335.00 | 42988      | 31.37      |        |          |              | 15 | 376.00 | 6662       | 4.86       |        |          |              |
| 8 | 335.90 | 8190       | 5.98       |        |          |              |    |        |            |            |        |          |              |

**Figure S138 LCMS spectrum of compound NPD-2997**

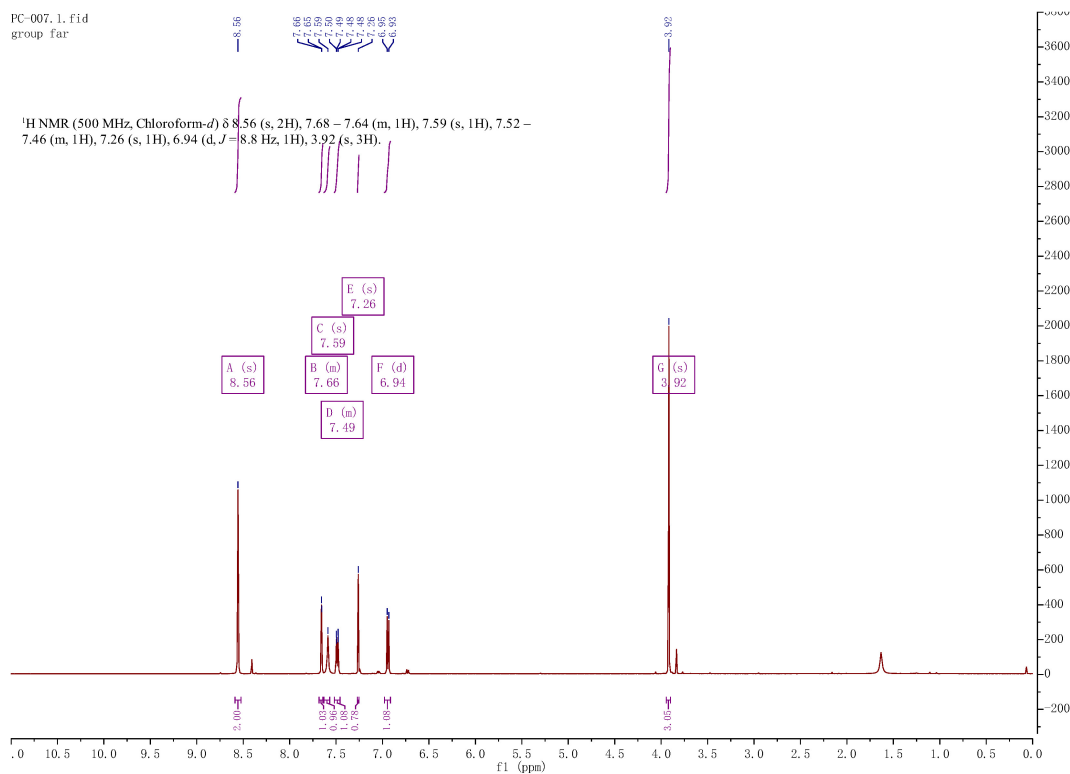

Figure S139  $^1\text{H}$  NMR spectrum of compound NPD-2997

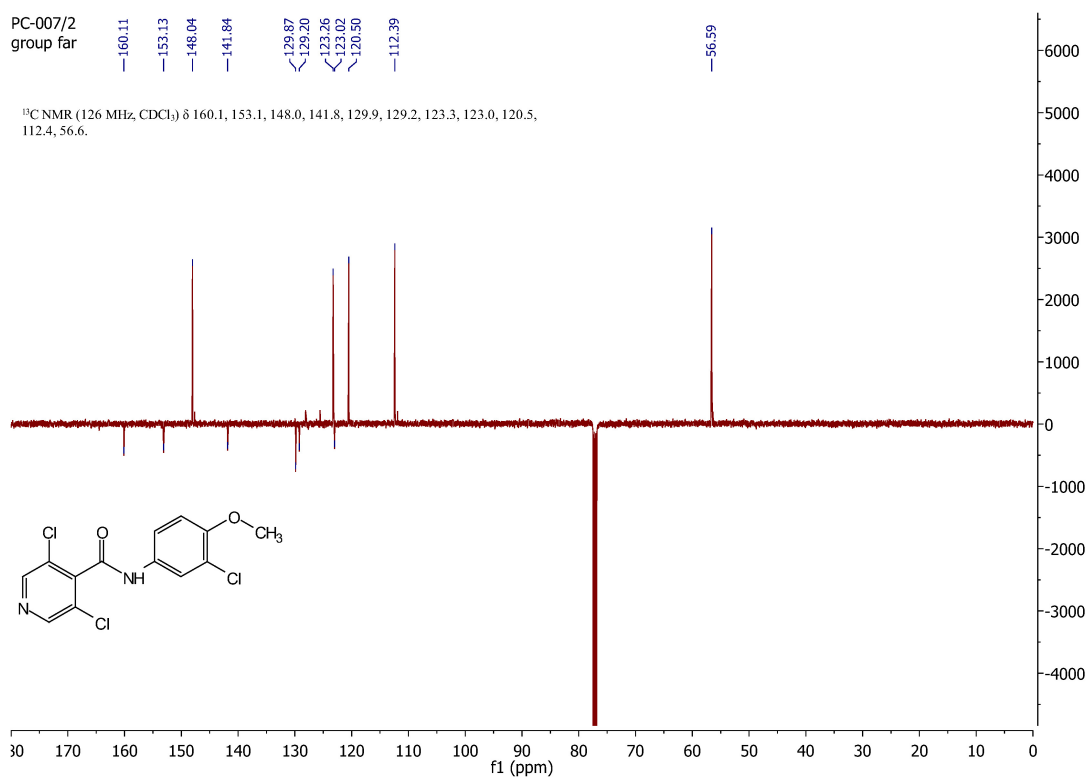

Figure S140  $^{13}\text{C}$  NMR spectrum of compound NPD-2997

Acquired by : Admin  
 Date Acquired : 2/23/2017 10:02:01 AM  
 Sample Name : PC-136  
 Sample ID :  
 Tray# : 1  
 Vial# : 20  
 Injection Volume : 1  
 Data File : C:\LabSolutions\Data\2017\2017-wk08\PC-136.lcd  
 Background File : blanco 23022017.lcd  
 Method File : Method SCAN ACID standard.lcm  
 Report Format : DefaultL.CMS.lcr  
 Tuning File : C:\LabSolutions\Tuning\Tuning-ESI-pos-neg01072015a.lct  
 Processed by : Admin  
 Modified Date : 2/23/2017 10:43:37 AM

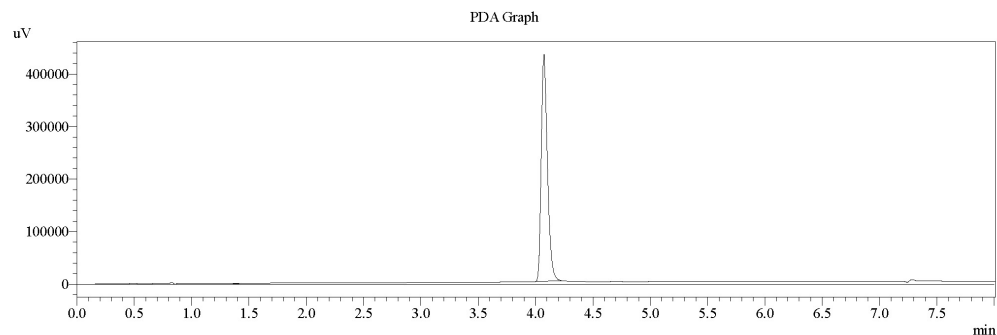

PDA Ch1 254nm 4nm

| Peak# | Name | Ret. Time | Area    | Area %  |
|-------|------|-----------|---------|---------|
| 1     |      | 4.067     | 1602139 | 100.000 |

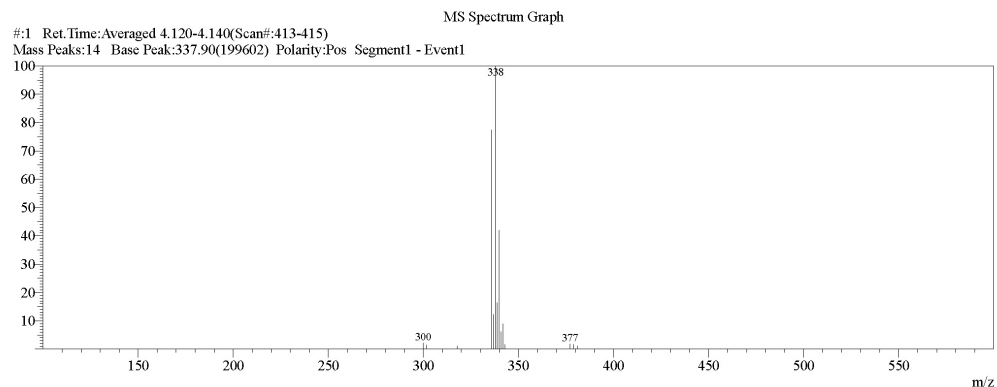

MS Spectrum Table

#1 Ret.Time:  
 BG Mode:Calc 4.020<->4.320(403<->433)  
 Mass Peaks:14 Base Peak:337.90(199602) Polarity:Pos Segment1 - Event1

| # | m/z    | Abs.Inten. | Rel.Inten. | Charge | Polarity | Monoisotopic | #  | m/z    | Abs.Inten. | Rel.Inten. | Charge | Polarity | Monoisotopic |
|---|--------|------------|------------|--------|----------|--------------|----|--------|------------|------------|--------|----------|--------------|
| 1 | 299.85 | 4378       | 2.19       |        |          |              | 8  | 339.85 | 83797      | 41.98      |        |          |              |
| 2 | 301.80 | 3054       | 1.53       |        |          |              | 9  | 340.85 | 12125      | 6.07       |        |          |              |
| 3 | 317.85 | 2056       | 1.03       |        |          |              | 10 | 341.90 | 17832      | 8.93       |        |          |              |
| 4 | 335.90 | 154624     | 77.47      |        |          |              | 11 | 342.95 | 3371       | 1.69       |        |          |              |
| 5 | 336.90 | 24398      | 12.22      |        |          |              | 12 | 377.00 | 3659       | 1.83       |        |          |              |
| 6 | 337.90 | 199602     | 100.00     |        |          |              | 13 | 378.80 | 3293       | 1.65       |        |          |              |
| 7 | 338.90 | 32867      | 16.47      |        |          |              | 14 | 380.95 | 2116       | 1.06       |        |          |              |

**Figure S141 LCMS spectrum of compound NPD-2998**

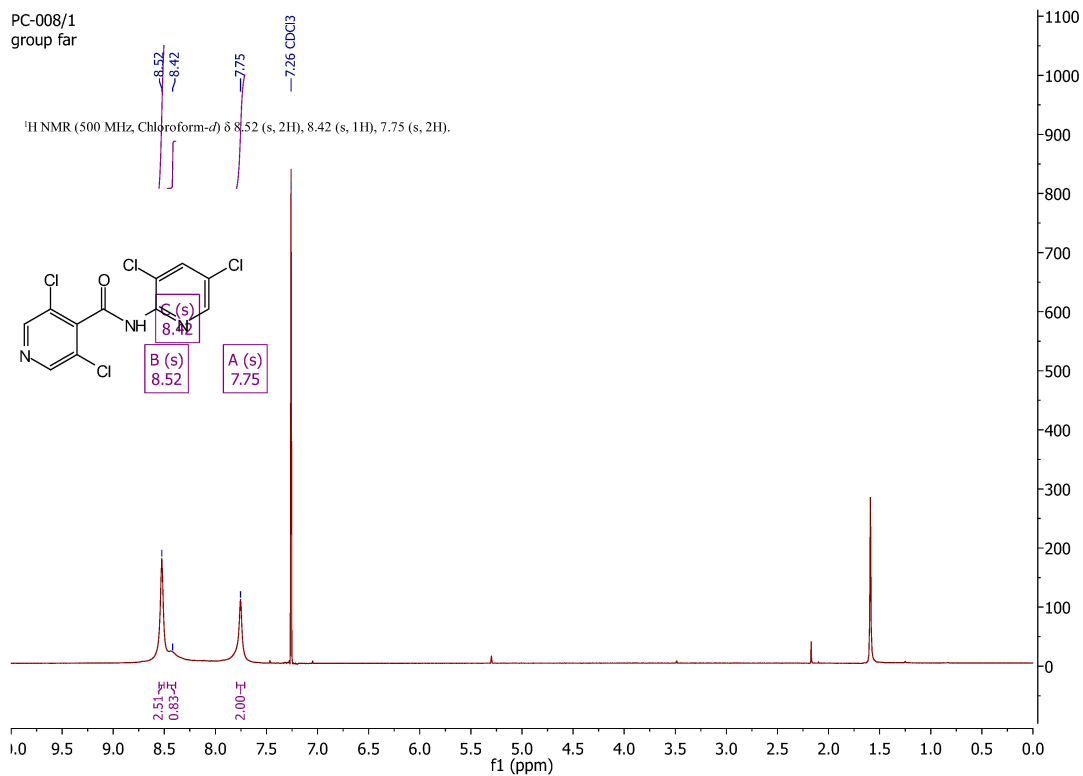

Figure S142 <sup>1</sup>H NMR spectrum of compound NPD-2998

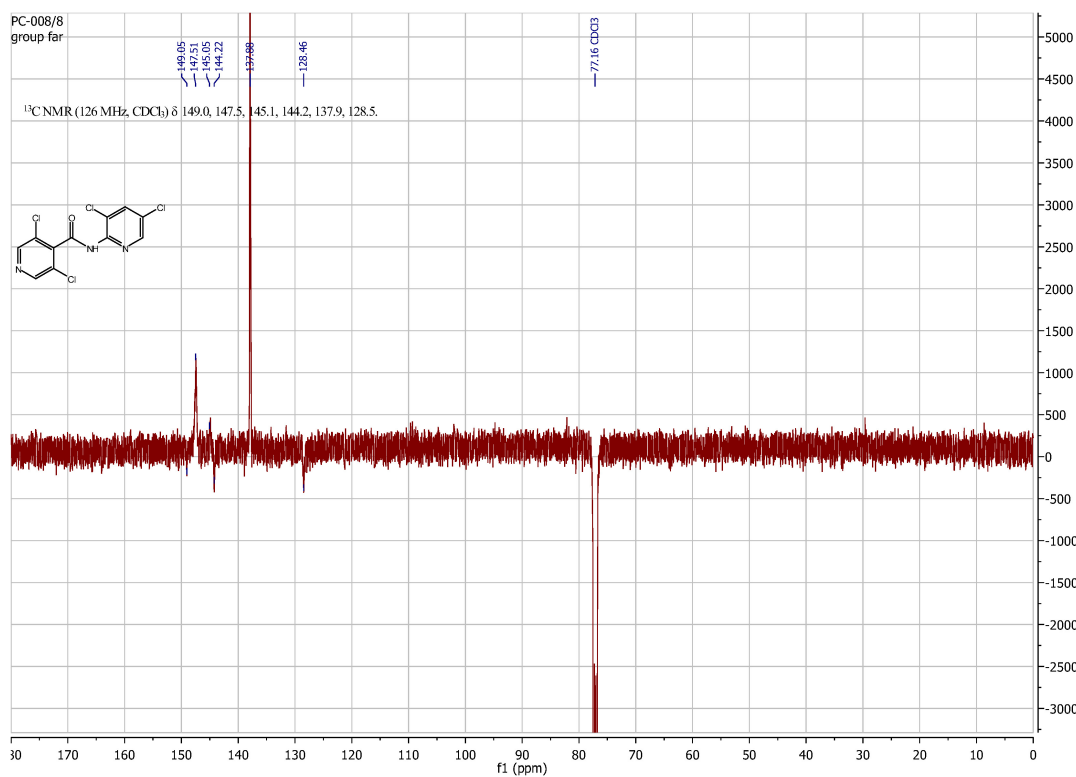

Figure S143 <sup>13</sup>C NMR spectrum of compound NPD-2998



Acquired by : Admin  
 Date Acquired : 2/23/2017 10:10:37 AM  
 Sample Name : PC-145  
 Sample ID :  
 Tray# : 1  
 Vial# : 21  
 Injection Volume : 1  
 Data File : C:\LabSolutions\Data\2017\2017-wk08\PC-145.lcd  
 Background File : blanco 23022017.lcd  
 Method File : Method SCAN ACID standard.lcm  
 Report Format : DefaultLCMS.lcr  
 Tuning File : C:\LabSolutions\Tuning\Tuning-ESI-pos-neg01072015a.lct  
 Processed by : Admin  
 Modified Date : 2/23/2017 11:59:46 AM

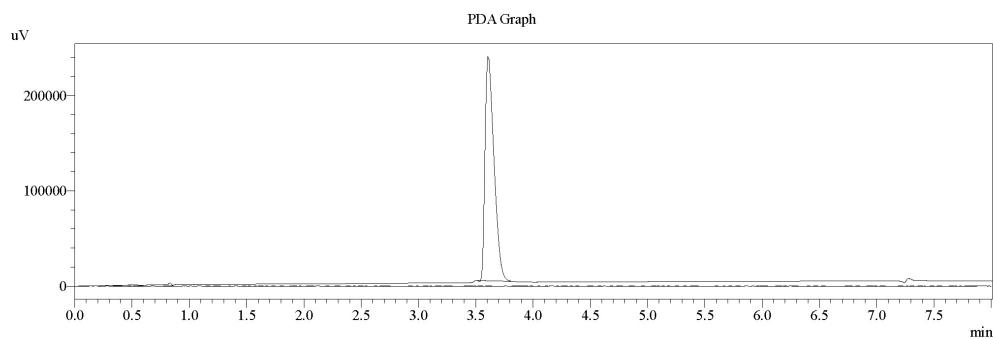

PDA Ch1 254nm 4nm

| Peak# | Name | Ret. Time | Area    | Area %  |
|-------|------|-----------|---------|---------|
| 1     |      | 3.604     | 1268254 | 100.000 |

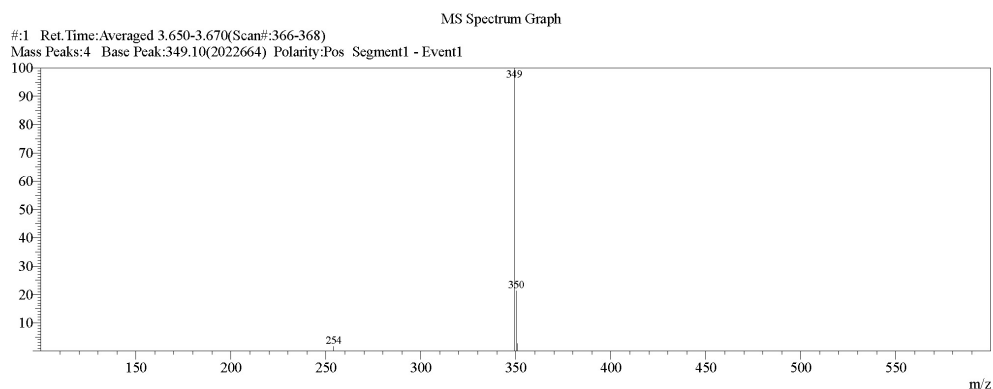

MS Spectrum Table

#1 Ret.Time:  
 BG Mode:Calc 3.520<->3.980(353<->399)  
 Mass Peaks:4 Base Peak:349.10(2022664) Polarity:Pos Segment1 - Event1

| # | m/z    | Abs.Inten. | Rel.Inten. | Charge | Polarity | Monoisotopic | # | m/z    | Abs.Inten. | Rel.Inten. | Charge | Polarity | Monoisotopic |
|---|--------|------------|------------|--------|----------|--------------|---|--------|------------|------------|--------|----------|--------------|
| 1 | 254.05 | 34110      | 1.69       |        |          |              | 3 | 350.10 | 431483     | 21.33      |        |          |              |
| 2 | 349.10 | 2022664    | 100.00     |        |          |              | 4 | 351.10 | 55256      | 2.73       |        |          |              |

**Figure S144 LCMS spectrum of compound NPD-2999**

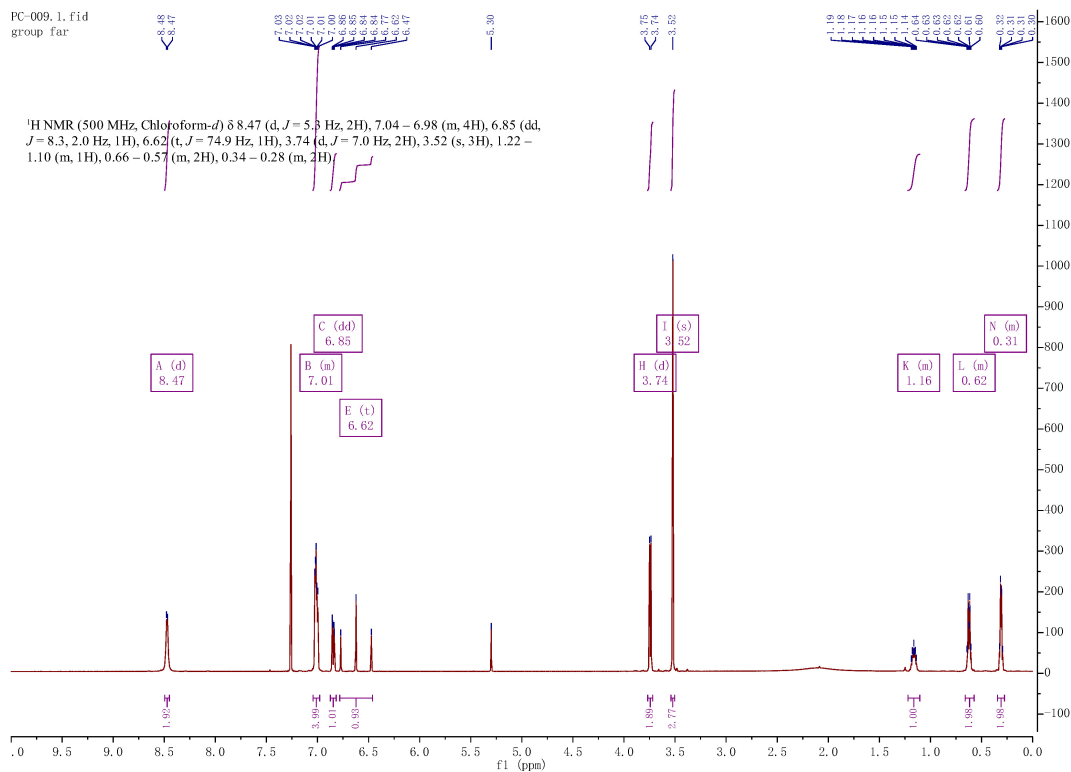

Figure S145  $^1\text{H}$  NMR spectrum of compound NPD-2999

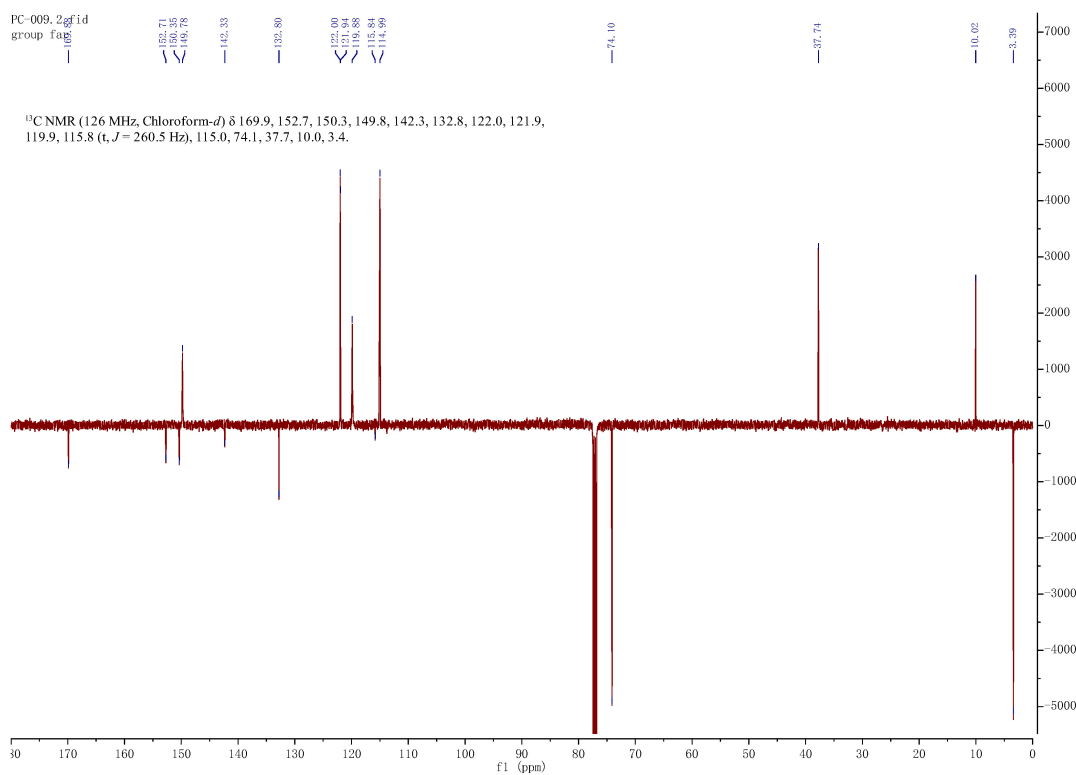

Figure S146  $^{13}\text{C}$  NMR spectrum of compound NPD-2999

Acquired by : Admin  
 Date Acquired : 2/23/2017 10:19:13 AM  
 Sample Name : PC-146  
 Sample ID :  
 Tray# : 1  
 Vial# : 22  
 Injection Volume : 1  
 Data File : C:\LabSolutions\Data\2017\2017-wk08\PC-146.Lcd  
 Background File : blanco 23022017.lcd  
 Method File : Method SCAN ACID standard.lcm  
 Report Format : DefaultLCMS.lcr  
 Tuning File : C:\LabSolutions\Tuning\Tuning-ESI-pos-neg01072015a.lct  
 Processed by : Admin  
 Modified Date : 2/23/2017 12:00:31 PM

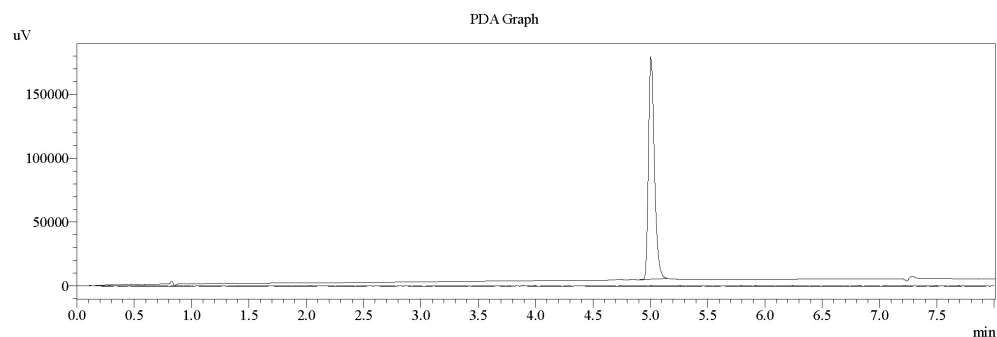

PDA Ch1 254nm 4nm

| Peak# | Name | Ret. Time | Area   | Area %  |
|-------|------|-----------|--------|---------|
| 1     |      | 5.001     | 628557 | 100.000 |

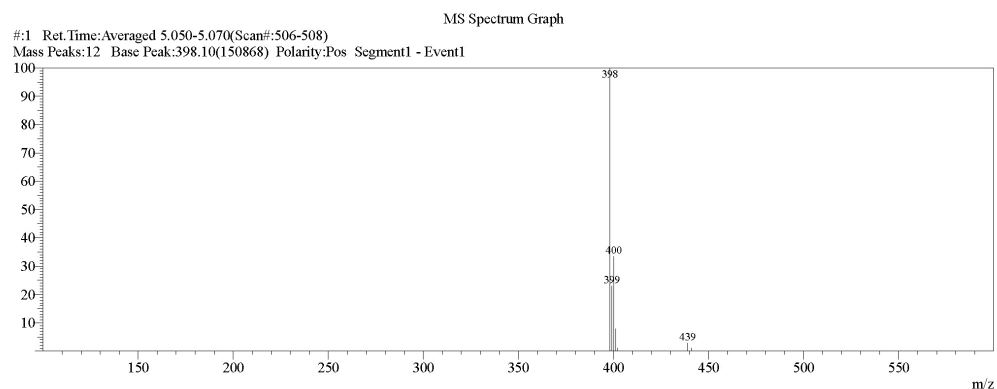

MS Spectrum Table

#1 Ret.Time:  
 BG Mode:Calc 4.950<->5.250(496<->526)

Mass Peaks:12 Base Peak:398.10(150868) Polarity:Pos Segment1 - Event1

| # | m/z    | Abs.Inten. | Rel.Inten. | Charge | Polarity | Monoisotopic | #  | m/z    | Abs.Inten. | Rel.Inten. | Charge | Polarity | Monoisotopic |
|---|--------|------------|------------|--------|----------|--------------|----|--------|------------|------------|--------|----------|--------------|
| 1 | 398.10 | 150868     | 100.00     |        |          |              | 7  | 441.05 | 1771       | 1.17       |        |          |              |
| 2 | 399.10 | 34813      | 23.08      |        |          |              | 8  | 623.60 | 3408       | 2.26       |        |          |              |
| 3 | 400.10 | 50380      | 33.39      |        |          |              | 9  | 624.70 | 4133       | 2.74       |        |          |              |
| 4 | 401.10 | 11841      | 7.85       |        |          |              | 10 | 625.75 | 2207       | 1.46       |        |          |              |
| 5 | 402.10 | 1575       | 1.04       |        |          |              | 11 | 631.70 | 1871       | 1.24       |        |          |              |
| 6 | 439.15 | 4307       | 2.85       |        |          |              | 12 | 823.40 | 1534       | 1.02       |        |          |              |

**Figure S147 LCMS spectrum of compound NPD-3000**

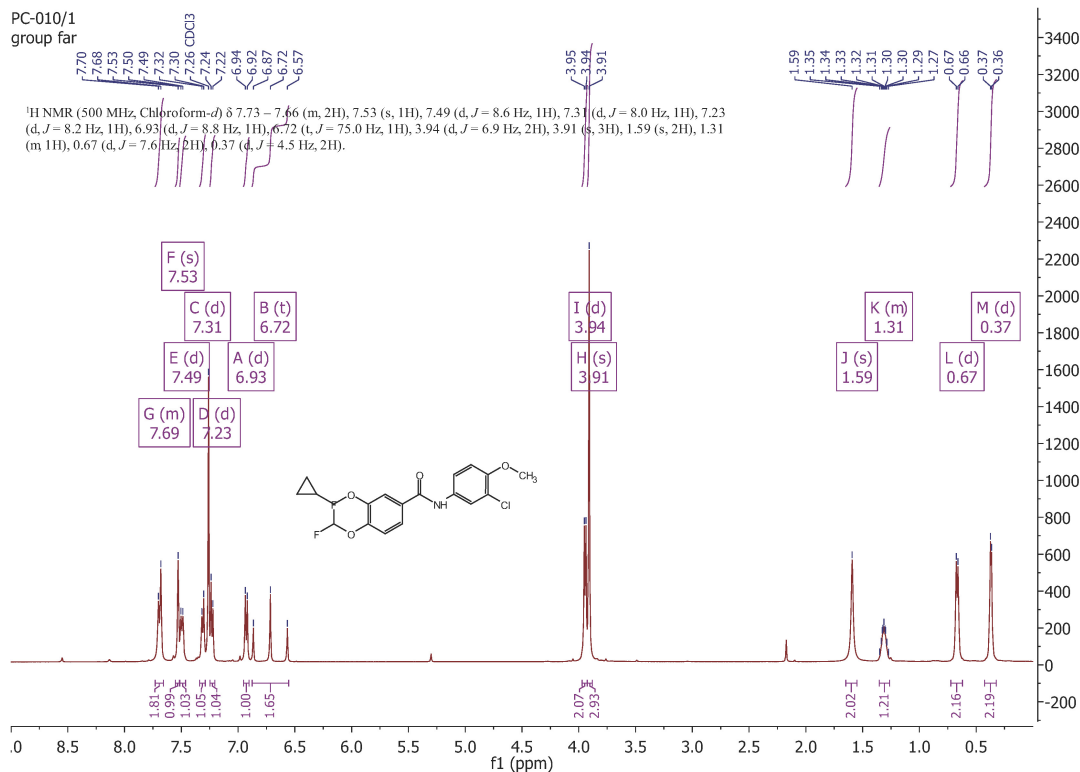

Figure S148 <sup>1</sup>H NMR spectrum of compound NPD-3000

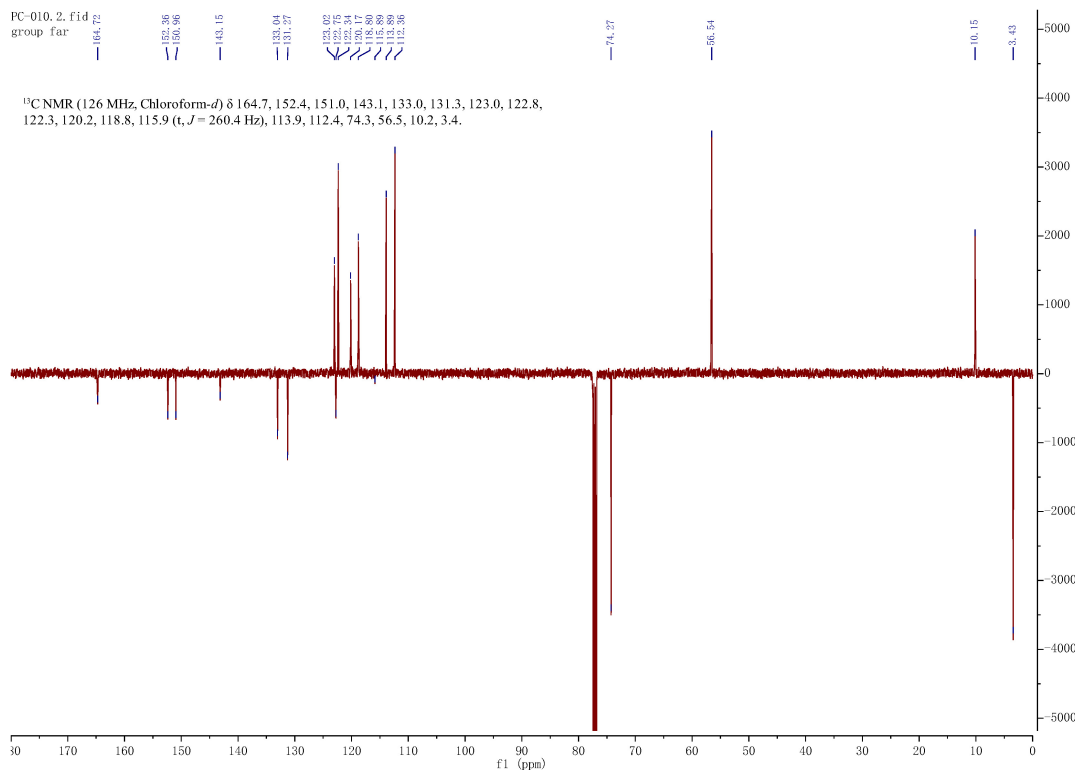

Figure S149 <sup>13</sup>C NMR spectrum of compound NPD-3000

Acquired by : Admin  
 Date Acquired : 2/23/2017 10:27:50 AM  
 Sample Name : PC-147  
 Sample ID :  
 Tray# : 1  
 Vial# : 23  
 Injection Volume : 1  
 Data File : C:\LabSolutions\Data\2017\2017-wk08\PC-147.lcd  
 Background File : blanco 23022017.lcd  
 Method File : Method SCAN ACID standard.lcm  
 Report Format : DefaultL.CMS.lcr  
 Tuning File : C:\LabSolutions\Tuning\Tuning-ESI-pos-neg01072015a.lct  
 Processed by : Admin  
 Modified Date : 2/23/2017 12:01:22 PM

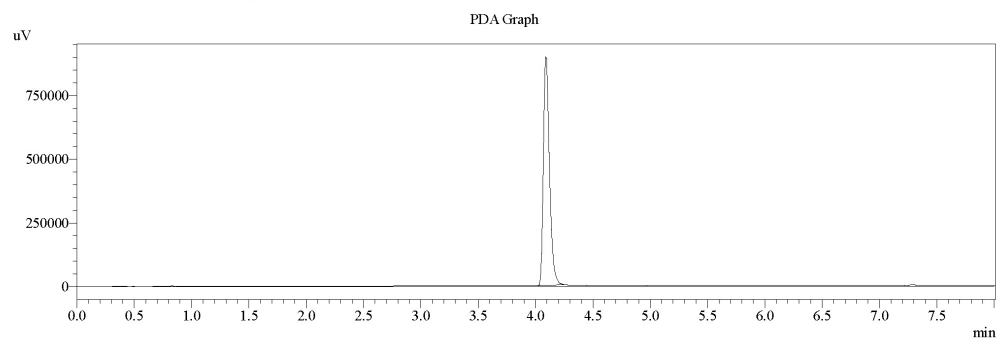

PDA Ch1 254nm 4nm

| Peak# | Name | Ret. Time | Area    | Area %  |
|-------|------|-----------|---------|---------|
| 1     |      | 4.085     | 3291341 | 100.000 |

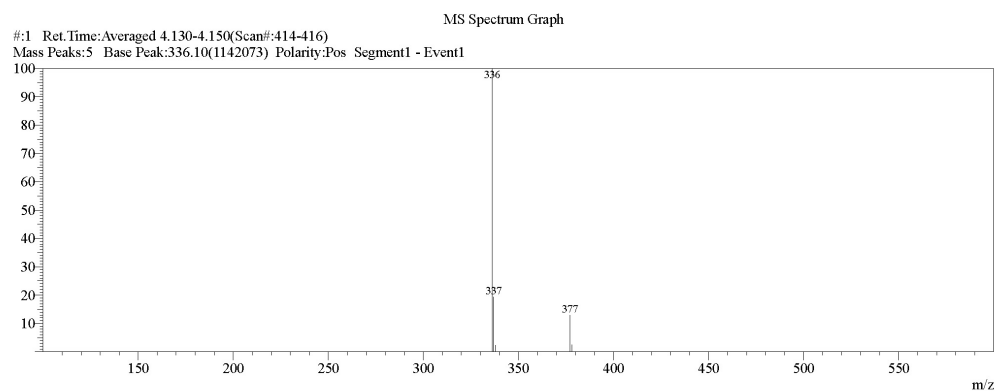

MS Spectrum Table

#1 Ret.Time:  
 BG Mode:Calc 4.020<->4.420(403<->443)

Mass Peaks:5 Base Peak:336.10(1142073) Polarity:Pos Segment1 - Event1

| # | m/z    | Abs.Inten. | Rel.Inten. | Charge | Polarity | Monoisotopic | # | m/z    | Abs.Inten. | Rel.Inten. | Charge | Polarity | Monoisotopic |
|---|--------|------------|------------|--------|----------|--------------|---|--------|------------|------------|--------|----------|--------------|
| 1 | 336.10 | 1142073    | 100.00     |        |          |              | 4 | 377.10 | 147807     | 12.94      |        |          |              |
| 2 | 337.10 | 221193     | 19.37      |        |          |              | 5 | 378.10 | 27991      | 2.45       |        |          |              |
| 3 | 338.10 | 26083      | 2.28       |        |          |              |   |        |            |            |        |          |              |

**Figure S150 LCMS spectrum of compound NPD-3001**

PC-011/1  
group far

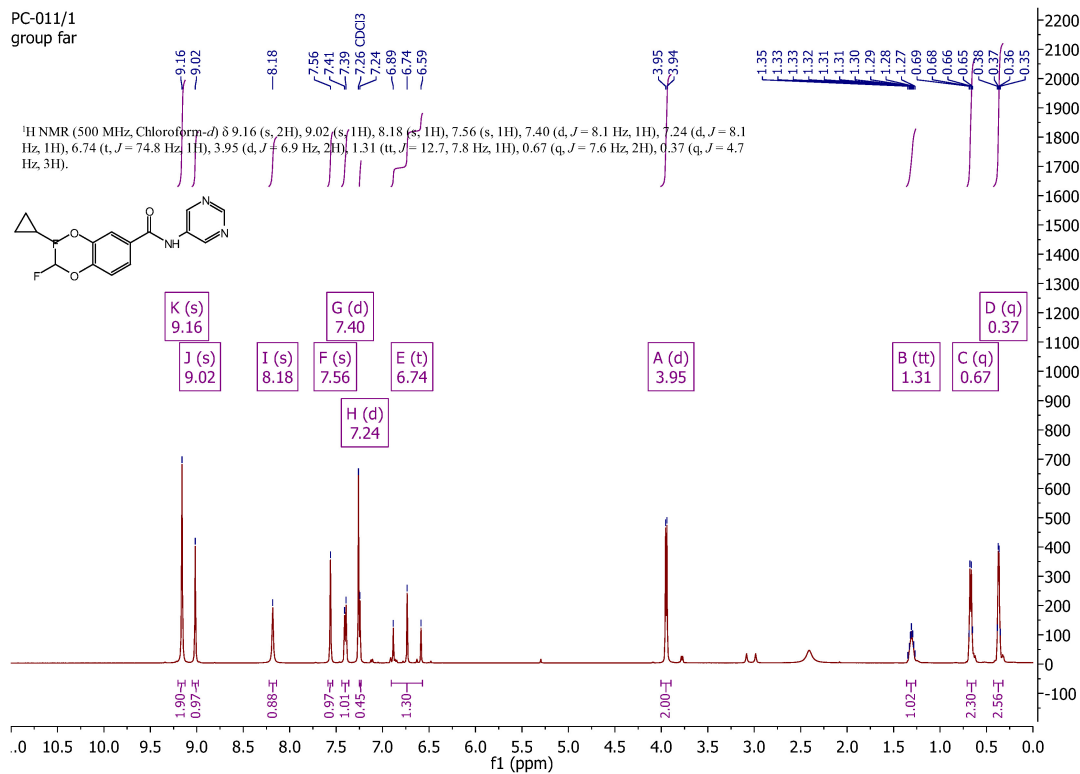

Figure S151 <sup>1</sup>H NMR spectrum of compound NPD-3001

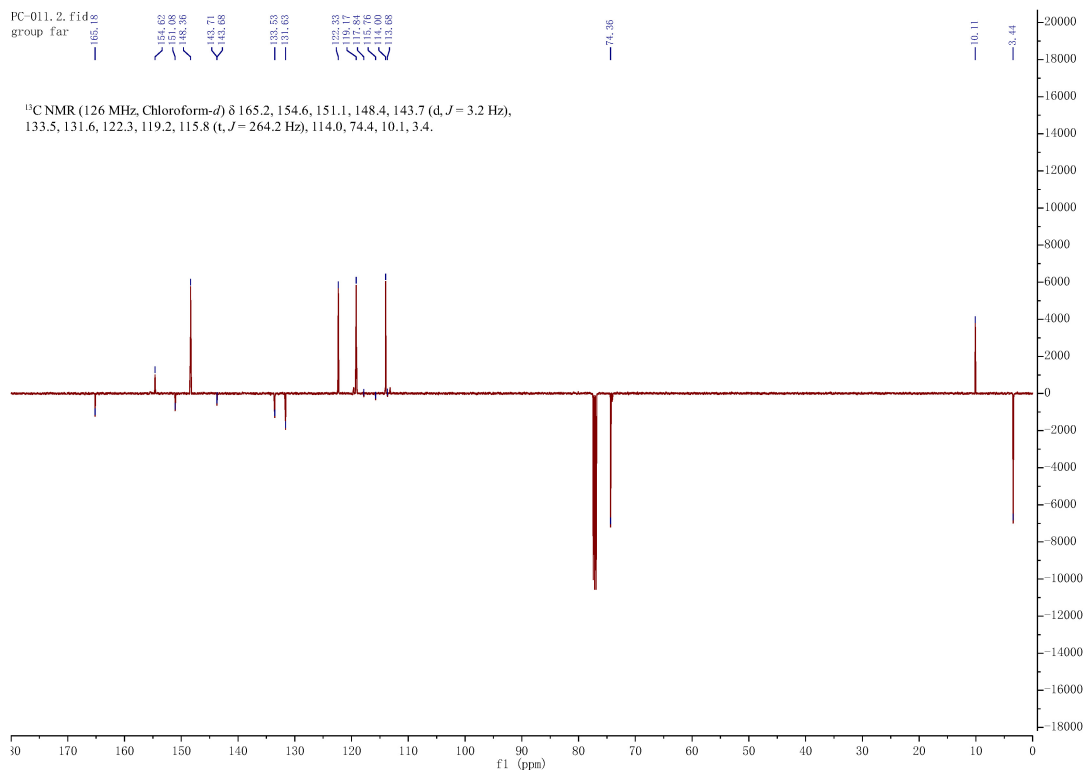

Figure S152 <sup>13</sup>C NMR spectrum of compound NPD-3001

Acquired by : Admin  
 Date Acquired : 2/1/2017 5:01:59 PM  
 Sample Name : cpd 113 Dominique  
 Sample ID :  
 Tray# : 1  
 Vial# : 11  
 Injection Volume : 1  
 Data File : C:\LabSolutions\Data\2017\2017-WK05\cpd 113 Dominique.lcd  
 Background File : Blanco01022017.lcd  
 Method File : Method SCAN ACID standard MW100.lcm  
 Report Format : DefaultL.CMS.lcr  
 Tuning File : C:\LabSolutions\Tuning\Tuning-ESI-pos-neg01072015a.lct  
 Processed by : Admin  
 Modified Date : 2/20/2017 4:06:21 PM

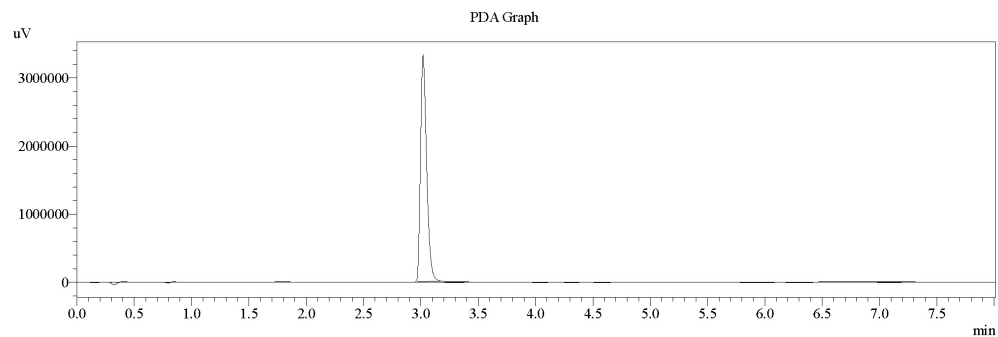

PDA Ch1 254nm 4nm

| Peak# | Name | Ret. Time | Area     | Area %  |
|-------|------|-----------|----------|---------|
| 1     |      | 3.014     | 12268611 | 100.000 |

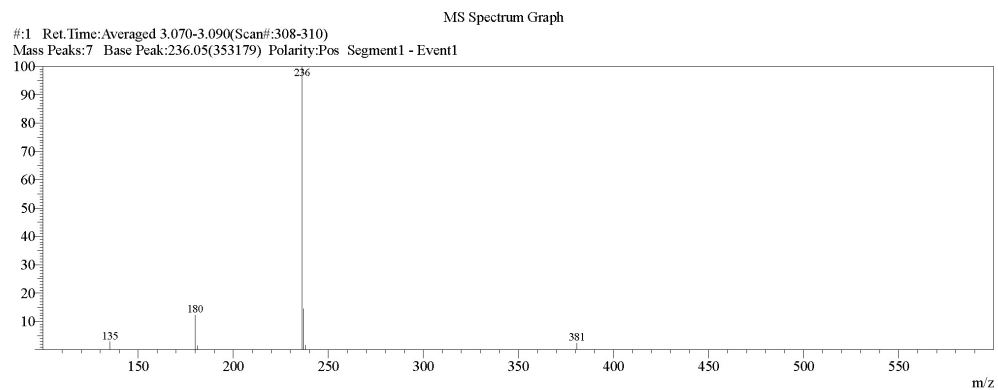

MS Spectrum Table

#1 Ret.Time:  
 BG Mode:Calc 2.980<->3.290(299<->330)

| # | m/z    | Abs.Inten. | Rel.Inten. | Charge | Polarity | Monoisotopic | # | m/z    | Abs.Inten. | Rel.Inten. | Charge | Polarity | Monoisotopic |
|---|--------|------------|------------|--------|----------|--------------|---|--------|------------|------------|--------|----------|--------------|
| 1 | 135.05 | 9777       | 2.77       |        |          |              | 5 | 237.05 | 50876      | 14.41      |        |          |              |
| 2 | 180.05 | 43065      | 12.19      |        |          |              | 6 | 238.10 | 5796       | 1.64       |        |          |              |
| 3 | 181.30 | 5006       | 1.42       |        |          |              | 7 | 380.70 | 8174       | 2.31       |        |          |              |
| 4 | 236.05 | 353179     | 100.00     |        |          |              |   |        |            |            |        |          |              |

**Figure S153 LCMS spectrum of compound NPD-3002**

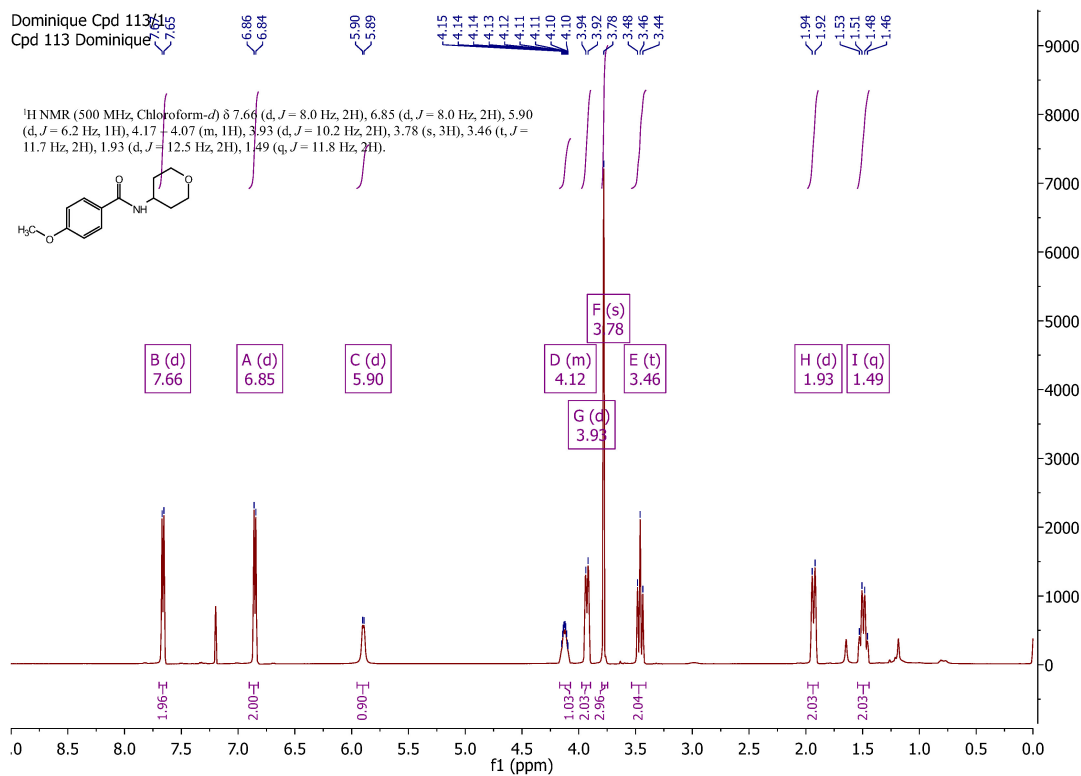

Figure S154 <sup>1</sup>H NMR spectrum of compound NPD-3002

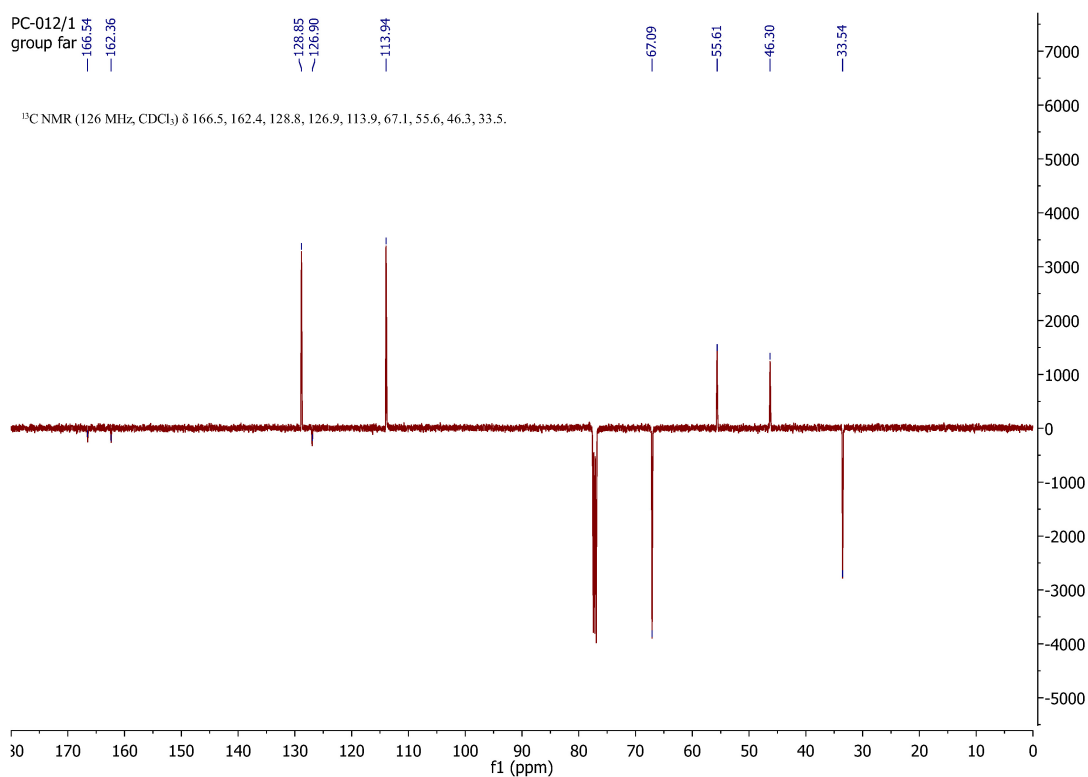

Figure S155 <sup>13</sup>C NMR spectrum of compound NPD-3002



Acquired by : Admin  
 Date Acquired : 2/1/2017 7:03:50 PM  
 Sample Name : cpd 119 Mohamad  
 Sample ID :  
 Tray# : 1  
 Vial# : 19  
 Injection Volume : 1  
 Data File : C:\LabSolutions\Data\2017\2017-WK05\cpd 119 Mohamad.lcd  
 Background File : Blanco01022017.lcd  
 Method File : Method SCAN ACID standard MW100.lcm  
 Report Format : DefaultL.CMS.lcr  
 Tuning File : C:\LabSolutions\Tuning\Tuning-ESI-pos-neg01072015a.lct  
 Processed by : Admin  
 Modified Date : 2/23/2017 4:21:11 PM

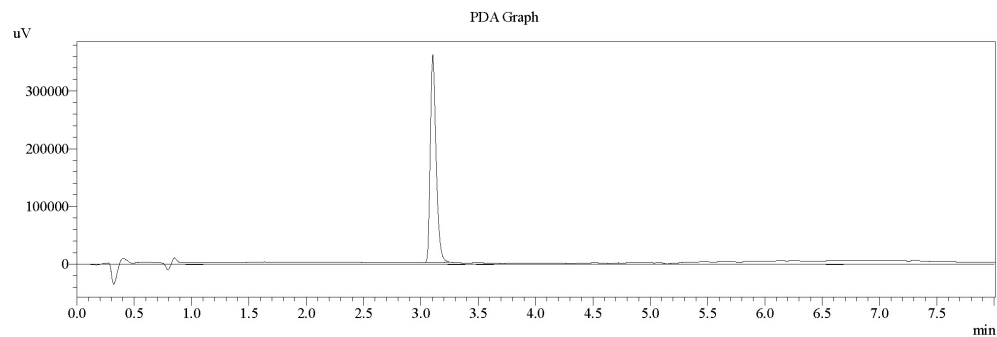

PDA Ch1 254nm 4nm

| Peak# | Name | Ret. Time | Area    | Area %  |
|-------|------|-----------|---------|---------|
| 1     |      | 3.098     | 1270468 | 100.000 |

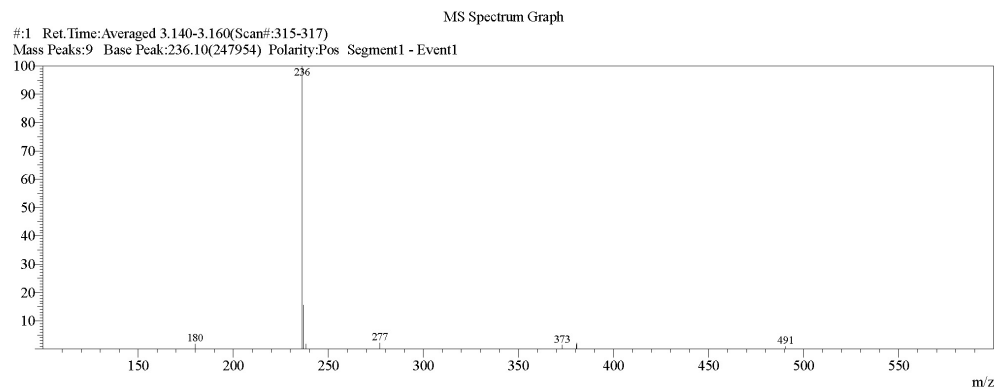

MS Spectrum Table

#1 Ret.Time:  
 BG Mode:Calc 3.040<->3.350(305<->336)

Mass Peaks:9 Base Peak:236.10(247954) Polarity:Pos Segment1 - Event1

| # | m/z    | Abs.Inten. | Rel.Inten. | Charge | Polarity | Monoisotopic | # | m/z    | Abs.Inten. | Rel.Inten. | Charge | Polarity | Monoisotopic |
|---|--------|------------|------------|--------|----------|--------------|---|--------|------------|------------|--------|----------|--------------|
| 1 | 179.90 | 4384       | 1.77       |        |          |              | 6 | 373.00 | 3481       | 1.40       |        |          |              |
| 2 | 236.10 | 247954     | 100.00     |        |          |              | 7 | 380.50 | 3832       | 1.55       |        |          |              |
| 3 | 237.05 | 38579      | 15.56      |        |          |              | 8 | 380.80 | 5476       | 2.21       |        |          |              |
| 4 | 238.15 | 4569       | 1.84       |        |          |              | 9 | 490.60 | 2505       | 1.01       |        |          |              |
| 5 | 277.15 | 5512       | 2.22       |        |          |              |   |        |            |            |        |          |              |

**Figure S156 LCMS spectrum of compound NPD-3003**

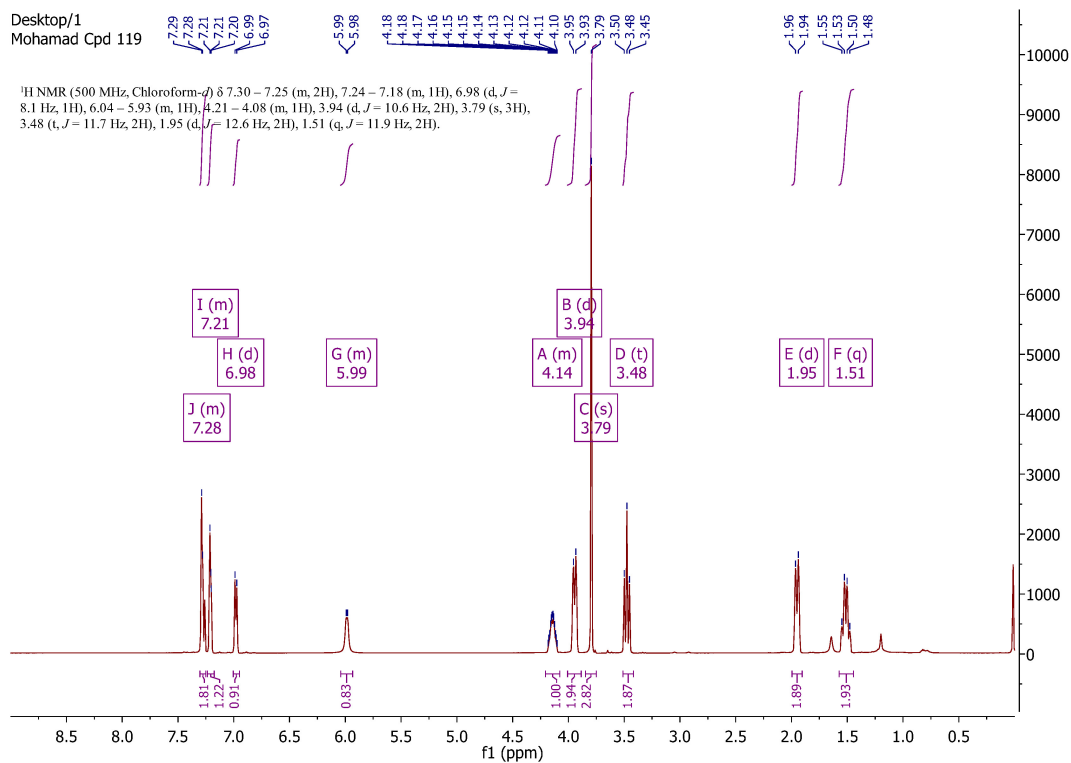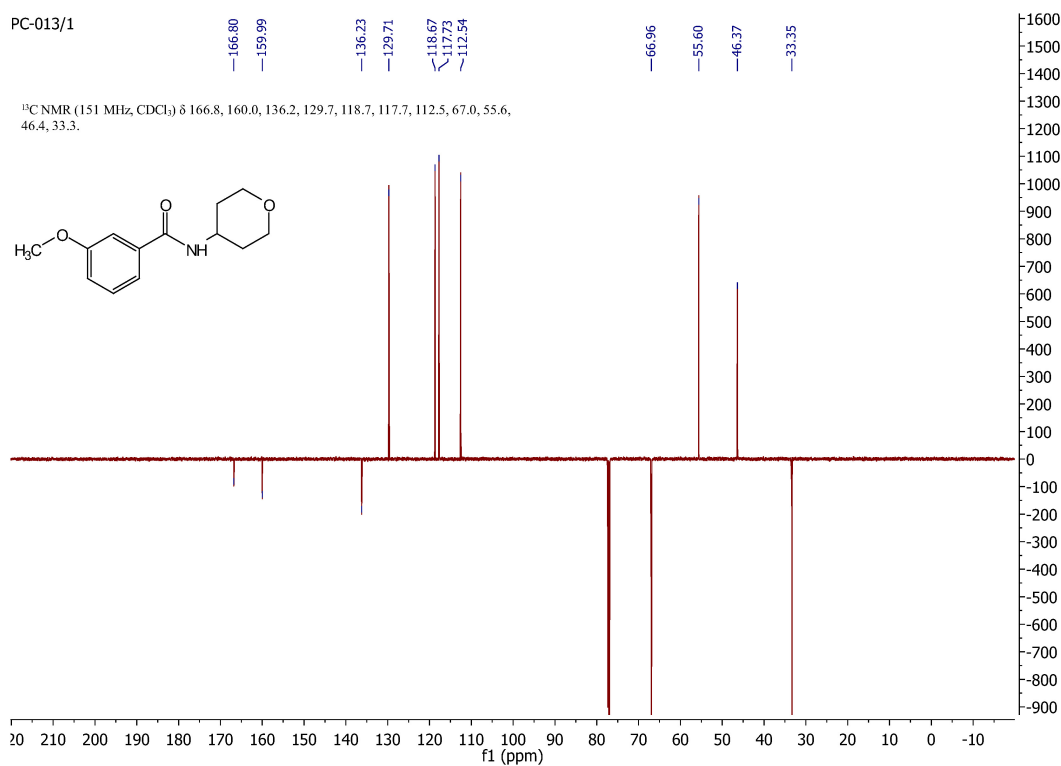

Acquired by : Admin  
 Date Acquired : 2/1/2017 7:29:38 PM  
 Sample Name : cpd 122-I Maurice  
 Sample ID :  
 Tray# : 1  
 Vial# : 22  
 Injection Volume : 1  
 Data File : C:\LabSolutions\Data\2017\2017-WK05\cpd 122-I Maurice.lcd  
 Background File : Blanco01022017.lcd  
 Method File : Method SCAN ACID standard MW100.lcm  
 Report Format : DefaultLCMS.lcr  
 Tuning File : C:\LabSolutions\Tuning\Tuning-ESI-pos-neg01072015a.lct  
 Processed by : Admin  
 Modified Date : 2/20/2017 4:07:55 PM

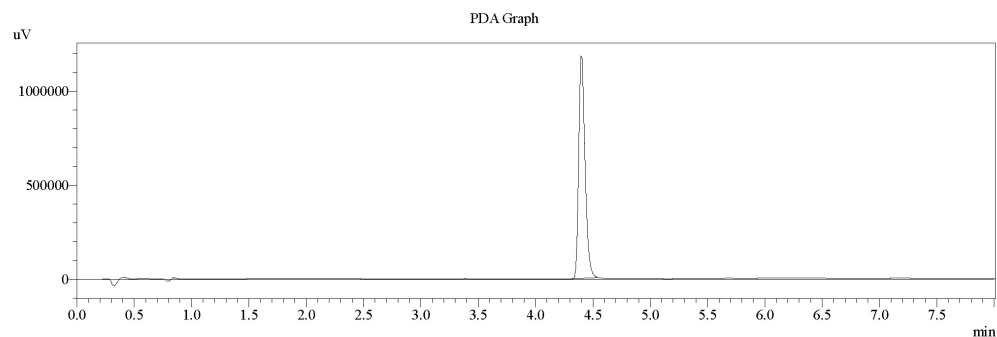

PDA Ch1 254nm 4nm

| Peak# | Name | Ret. Time | Area    | Area %  |
|-------|------|-----------|---------|---------|
| 1     |      | 4.394     | 4518440 | 100.000 |

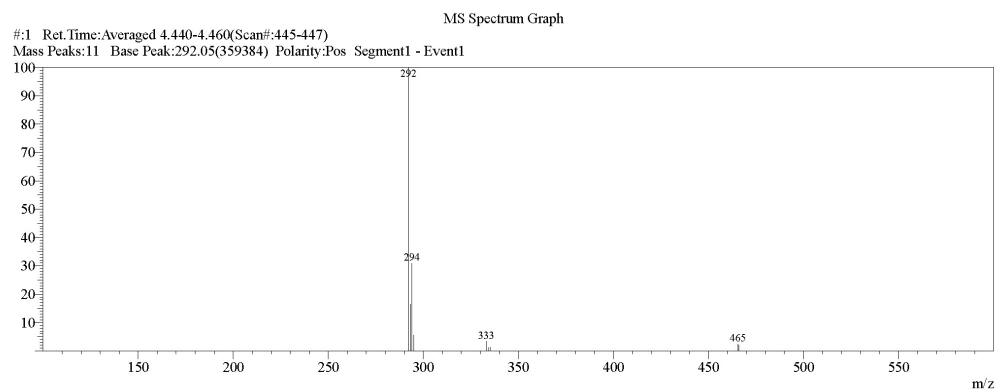

MS Spectrum Table

#1 Ret.Time:  
BG Mode:Calc 4.330<=>4.690(434<=>470)  
Mass Peaks:11 Base Peak:292.05(359384) Polarity:Pos Segment1 - Event1

| # | m/z    | Abs.Inten. | Rel.Inten. | Charge | Polarity | Monoisotopic | #  | m/z    | Abs.Inten. | Rel.Inten. | Charge | Polarity | Monoisotopic |
|---|--------|------------|------------|--------|----------|--------------|----|--------|------------|------------|--------|----------|--------------|
| 1 | 292.05 | 359384     | 100.00     |        |          |              | 7  | 335.15 | 4939       | 1.37       |        |          |              |
| 2 | 293.10 | 59297      | 16.50      |        |          |              | 8  | 465.55 | 8571       | 2.38       |        |          |              |
| 3 | 294.00 | 111312     | 30.97      |        |          |              | 9  | 465.95 | 7184       | 2.00       |        |          |              |
| 4 | 295.10 | 19875      | 5.53       |        |          |              | 10 | 610.75 | 3990       | 1.11       |        |          |              |
| 5 | 333.10 | 12236      | 3.40       |        |          |              | 11 | 612.05 | 4036       | 1.12       |        |          |              |
| 6 | 334.10 | 4080       | 1.14       |        |          |              |    |        |            |            |        |          |              |

**Figure S159 LCMS spectrum of compound NPD-3004**

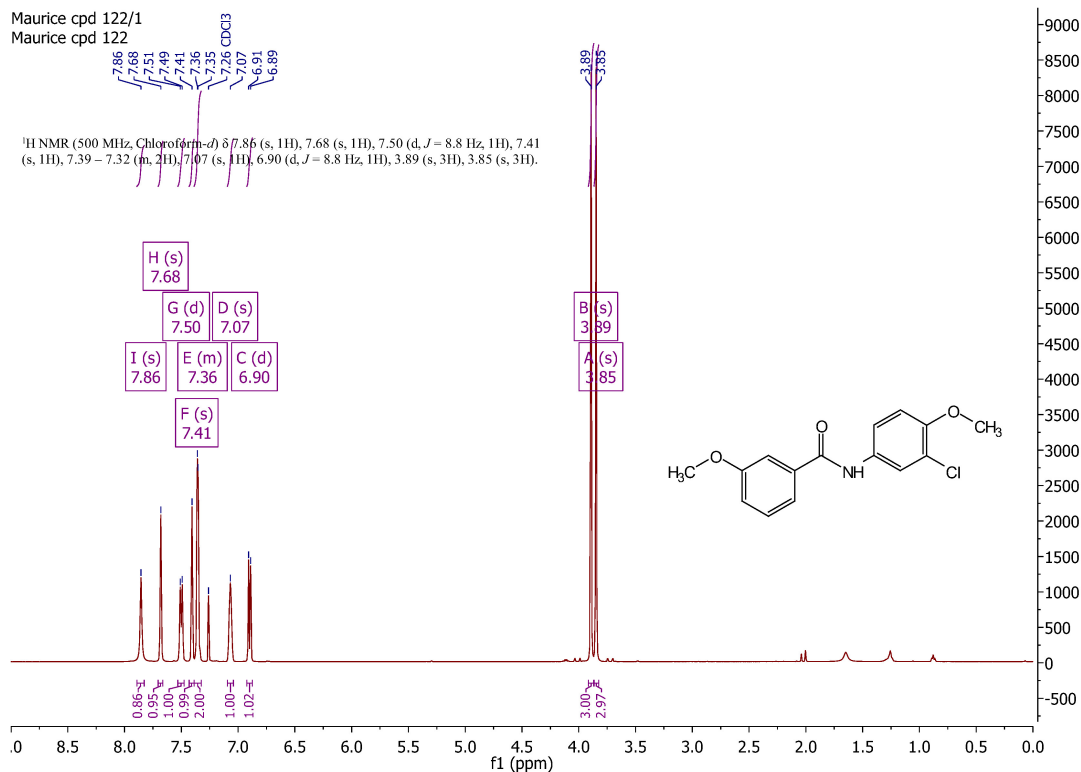

Figure S160 <sup>1</sup>H NMR spectrum of compound NPD-3004

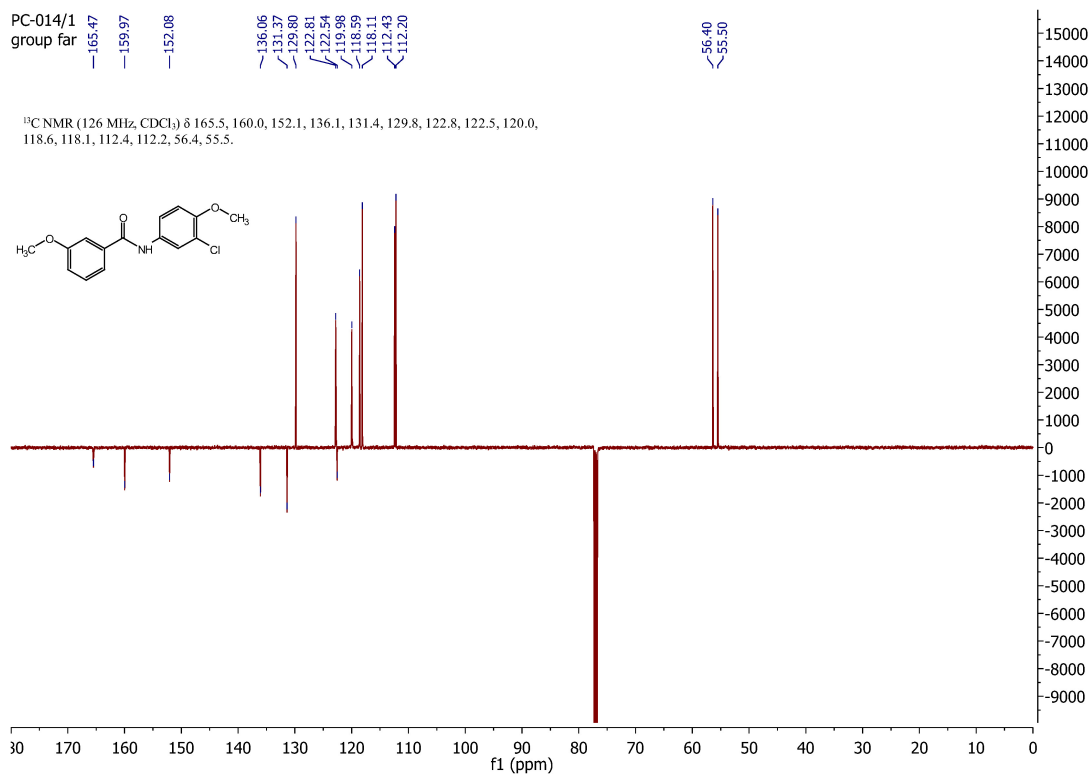

Figure S161 <sup>13</sup>C NMR spectrum of compound NPD-3004

Acquired by : Admin  
Date Acquired : 15/5/2019 2:06:17 PM  
Sample Name : PC-015-1  
Sample ID :  
Tray# : 1  
Vial# : 17  
Injection Volume : 2  
Data File : C:\LabSolutions\Data\2019\2019-wk20\PC-015-1.lcd  
Background File : blanco 15052019.lcd  
Method File : Method SCAN ACID standard.lcm  
Report Format : DefaultL.CMS.lcr  
Tuning File : C:\LabSolutions\Tuning\Tuning-ESI-pos-neg01072015a.lct  
Processed by : Admin  
Modified Date : 15/5/2019 3:39:17 PM

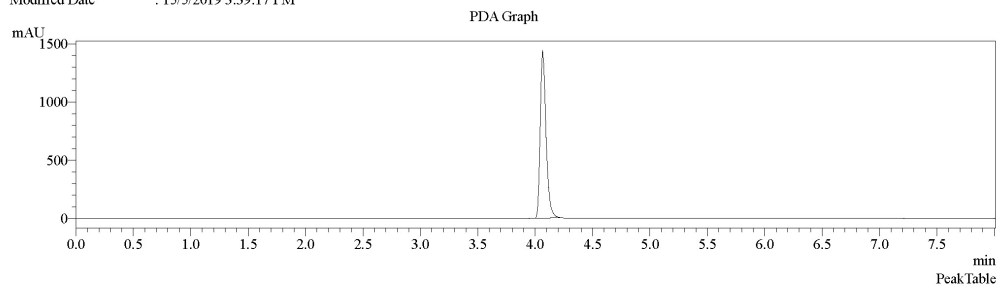

PDA Ch1 254nm 4nm

| Peak# | Name | Ret. Time | Area    | Area % |
|-------|------|-----------|---------|--------|
| 1     |      | 4.060     | 5063651 | 99.841 |
| 2     |      | 4.708     | 8066    | 0.159  |

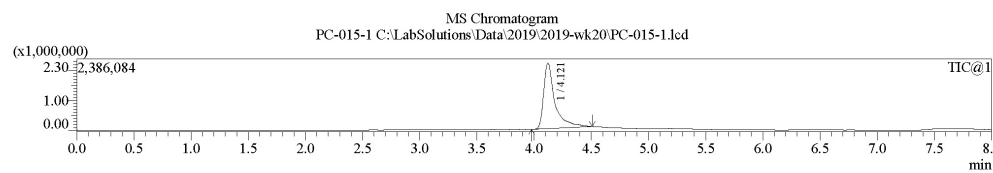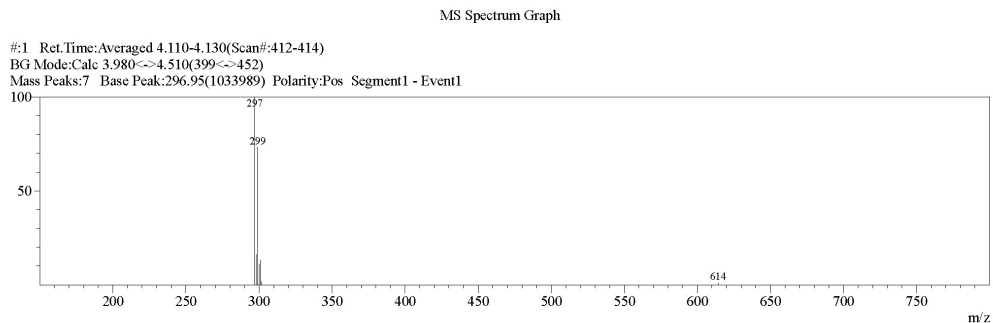

#1 Ret.Time: Averaged 4.110-4.130(Scan#:412-414)  
BG Mode:Calc 3.980<->4.510(399<->452)  
Mass Peaks:7 Base Peak:296.95(1033989) Polarity:Pos Segment1 - Event1

| # | m/z    | Abs.Inten. | Rel.Inten. | Charge | Polarity | Monoisotopic | # | m/z    | Abs.Inten. | Rel.Inten. | Charge | Polarity | Monoisotopic |
|---|--------|------------|------------|--------|----------|--------------|---|--------|------------|------------|--------|----------|--------------|
| 1 | 296.95 | 1033989    | 100.00     |        |          |              | 5 | 300.95 | 137316     | 13.28      |        |          |              |
| 2 | 298.00 | 166920     | 16.14      |        |          |              | 6 | 301.85 | 17748      | 1.72       |        |          |              |
| 3 | 299.00 | 759043     | 73.41      |        |          |              | 7 | 614.15 | 11671      | 1.13       |        |          |              |
| 4 | 299.95 | 113931     | 11.02      |        |          |              |   |        |            |            |        |          |              |

Figure S162 LCMS spectrum of compound NPD-3005

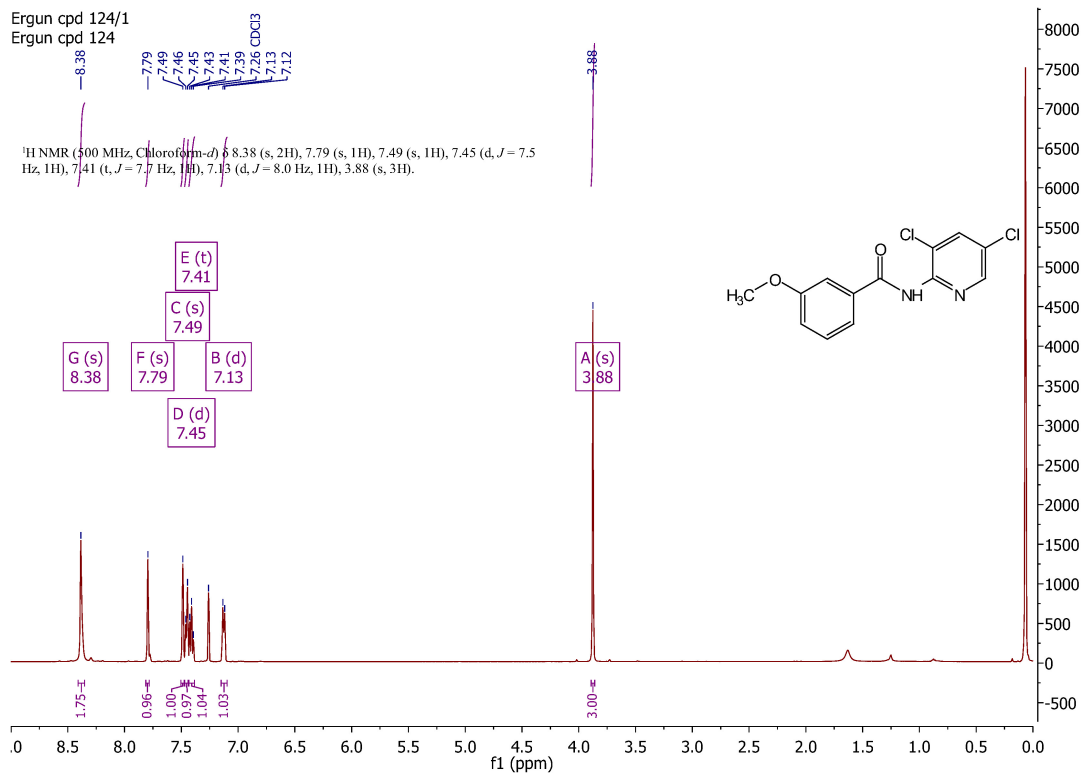

Figure S163 <sup>1</sup>H NMR spectrum of compound NPD-3005

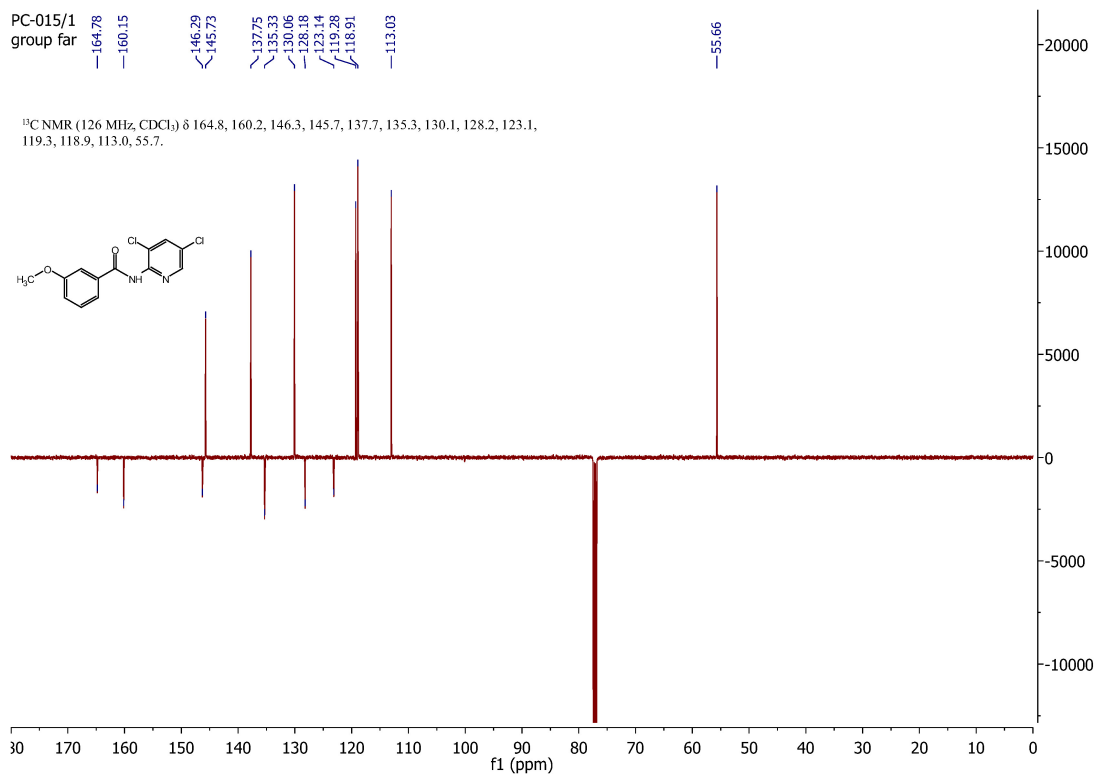

Figure S164 <sup>13</sup>C NMR spectrum of compound NPD-3005

Acquired by : Admin  
Date Acquired : 22/5/2019 12:27:18 PM  
Sample Name : VUF16127  
Sample ID :  
Tray# : 1  
Vial# : 7  
Injection Volume : 2  
Data File : C:\LabSolutions\Data\2019\2019-wk21\VUF16127.lcd  
Background File : blanco 22052019.lcd  
Method File : Method SCAN ACID standard.lcm  
Report Format : DefaultLCMS.lcr  
Tuning File : C:\LabSolutions\Tuning\Tuning-ESI-pos-neg01072015a.lct  
Processed by : Admin  
Modified Date : 22/5/2019 12:59:26 PM

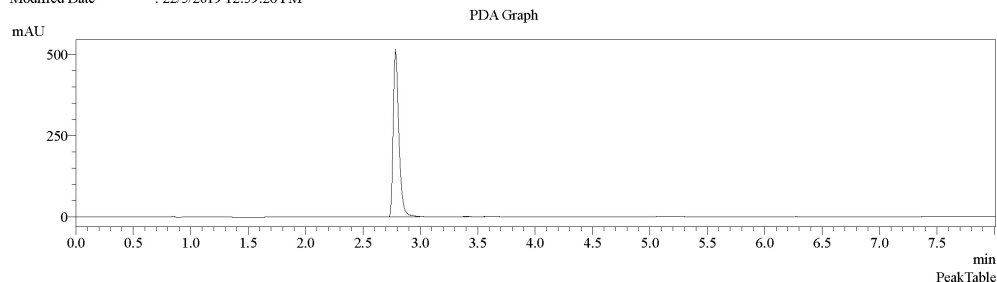

PDA Ch1 254nm 4nm

| Peak# | Name | Ret. Time | Area    | Area % |
|-------|------|-----------|---------|--------|
| 1     |      | 2.393     | 2190    | 0.125  |
| 2     |      | 2.778     | 1738088 | 99.543 |
| 3     |      | 3.387     | 1798    | 0.103  |
| 4     |      | 3.593     | 4001    | 0.229  |

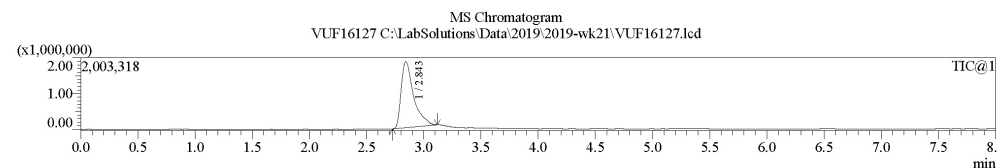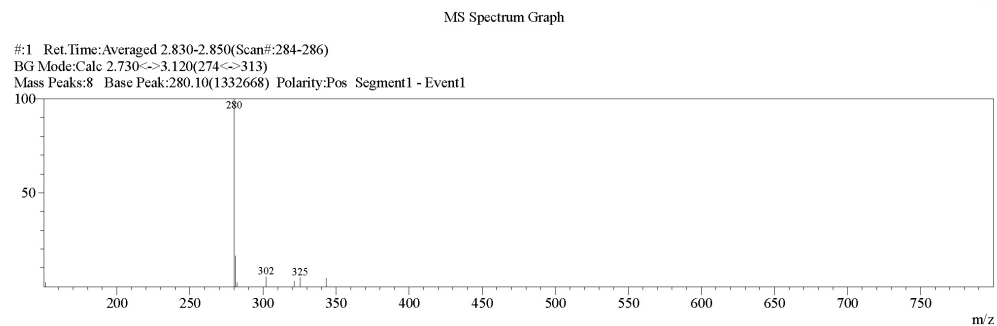

#1 Ret.Time: Averaged 2.830-2.850(Scan#:284-286)  
BG Mode:Calc 2.730<->3.120(274<->313)  
Mass Peaks:8 Base Peak:280.10(1332668) Polarity:Pos Segment1 - Event1

| # | m/z    | Abs.Inten. | Rel.Inten. | Charge | Polarity | Monoisotopic |
|---|--------|------------|------------|--------|----------|--------------|
| 1 | 151.00 | 30849      | 2.31       |        |          |              |
| 2 | 280.10 | 1332668    | 100.00     |        |          |              |
| 3 | 281.10 | 219538     | 16.47      |        |          |              |
| 4 | 282.05 | 28743      | 2.16       |        |          |              |
| 5 | 302.05 | 66981      | 5.03       |        |          |              |
| 6 | 321.10 | 39725      | 2.98       |        |          |              |
| 7 | 325.20 | 62900      | 4.72       |        |          |              |
| 8 | 343.15 | 61585      | 4.62       |        |          |              |

Figure S165 LCMS spectrum of compound NPD-3006

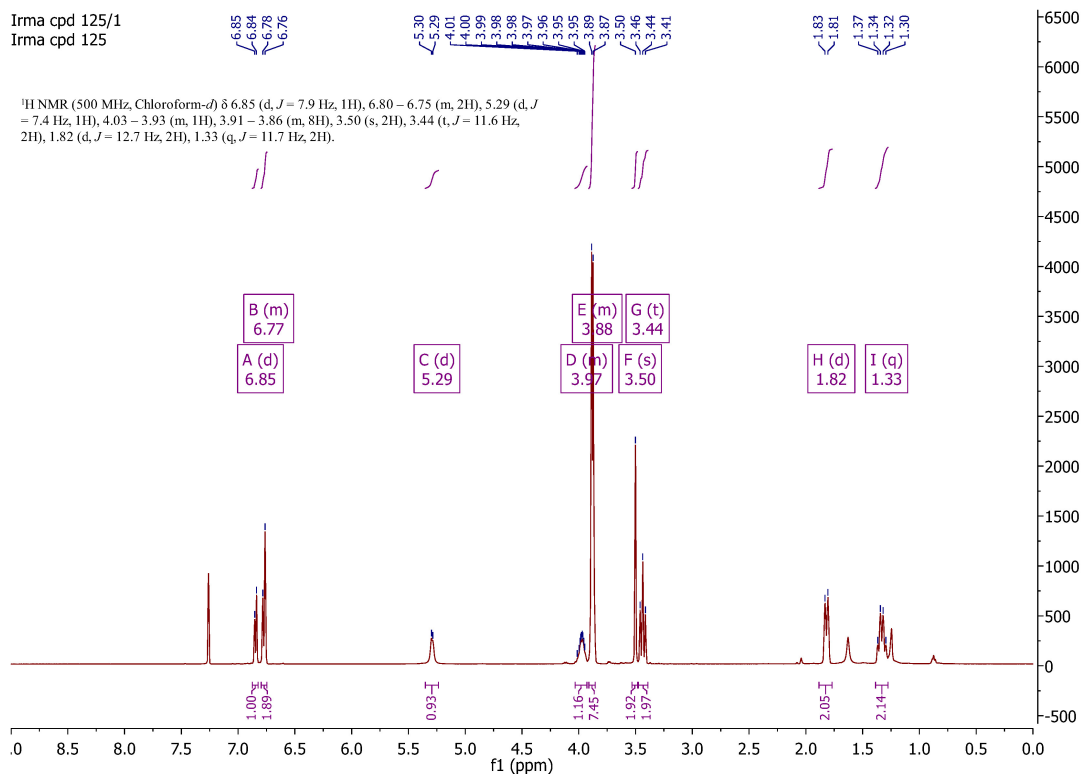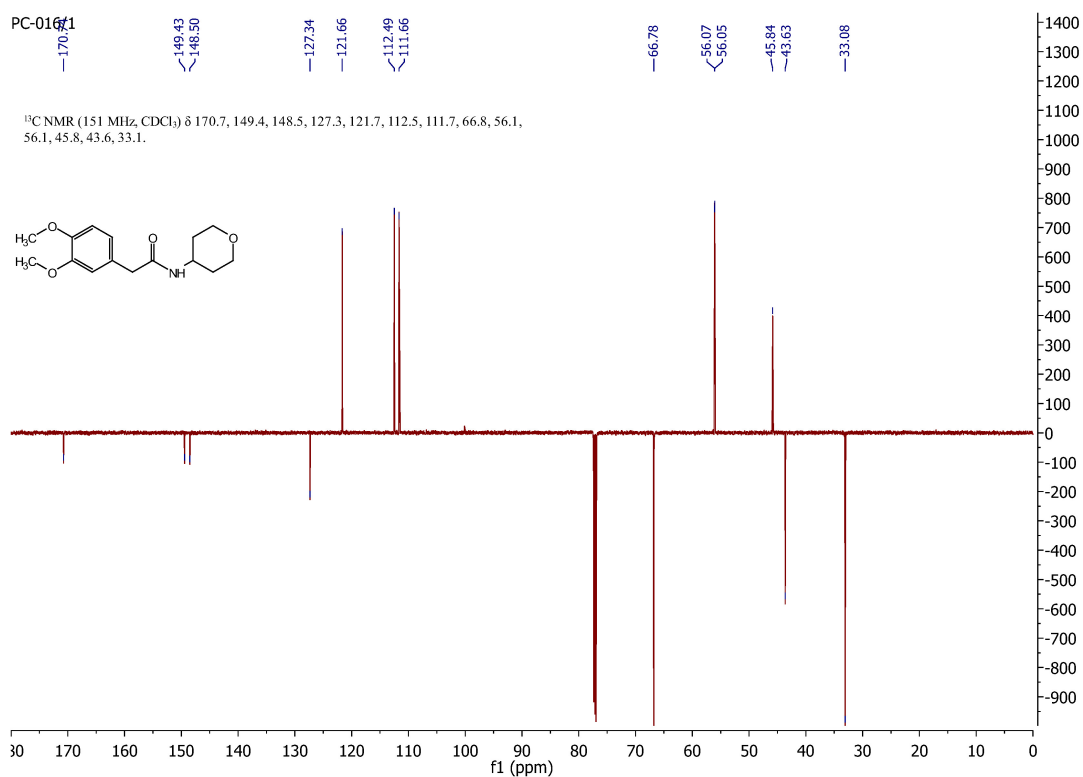



Acquired by : Admin  
 Date Acquired : 2/1/2017 9:56:02 PM  
 Sample Name : cpd 143 Nargisse  
 Sample ID :  
 Tray# : 1  
 Vial# : 39  
 Injection Volume : 1  
 Data File : C:\LabSolutions\Data\2017\2017-WK05\cpd 143 Nargisse.lcd  
 Background File : Blanco01022017.lcd  
 Method File : Method SCAN ACID standard MW100.lcm  
 Report Format : DefaultL.CMS.lcr  
 Tuning File : C:\LabSolutions\Tuning\Tuning-ESI-pos-neg01072015a.lct  
 Processed by : Admin  
 Modified Date : 2/20/2017 4:10:08 PM

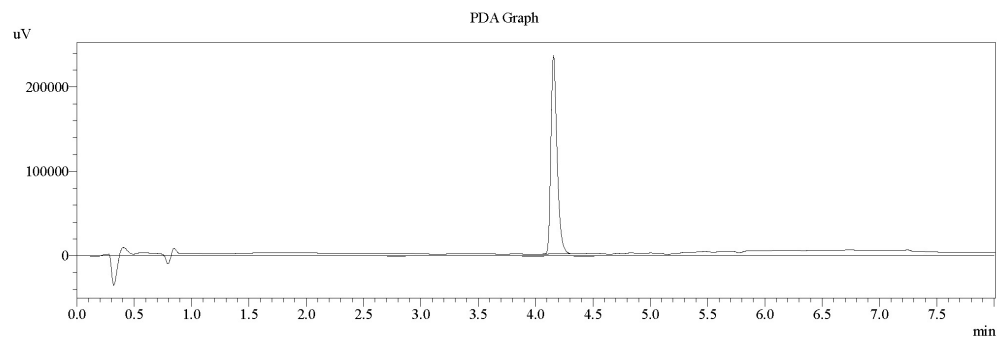

PDA Ch1 254nm 4nm

| Peak# | Name | Ret. Time | Area   | Area %  |
|-------|------|-----------|--------|---------|
| 1     |      | 4.151     | 886700 | 100.000 |

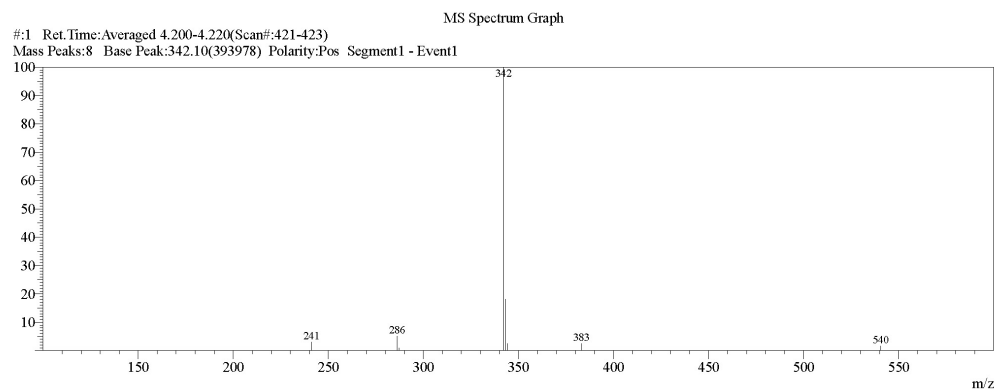

MS Spectrum Table

#1 Ret.Time:  
 BG Mode:Calc 4.090<->4.390(410<->440)

| # | m/z    | Abs.Inten. | Rel.Inten. | Charge | Polarity | Monoisotopic | # | m/z    | Abs.Inten. | Rel.Inten. | Charge | Polarity | Monoisotopic |
|---|--------|------------|------------|--------|----------|--------------|---|--------|------------|------------|--------|----------|--------------|
| 1 | 241.00 | 12221      | 3.10       |        |          |              | 5 | 343.15 | 71695      | 18.20      |        |          |              |
| 2 | 286.10 | 20021      | 5.08       |        |          |              | 6 | 344.15 | 10110      | 2.57       |        |          |              |
| 3 | 287.10 | 3949       | 1.00       |        |          |              | 7 | 383.05 | 9814       | 2.49       |        |          |              |
| 4 | 342.10 | 393978     | 100.00     |        |          |              | 8 | 540.50 | 6261       | 1.59       |        |          |              |

**Figure S168 LCMS spectrum of compound NPD-3007**

Narjisse cpd 143/1  
Narjisse cpd 143

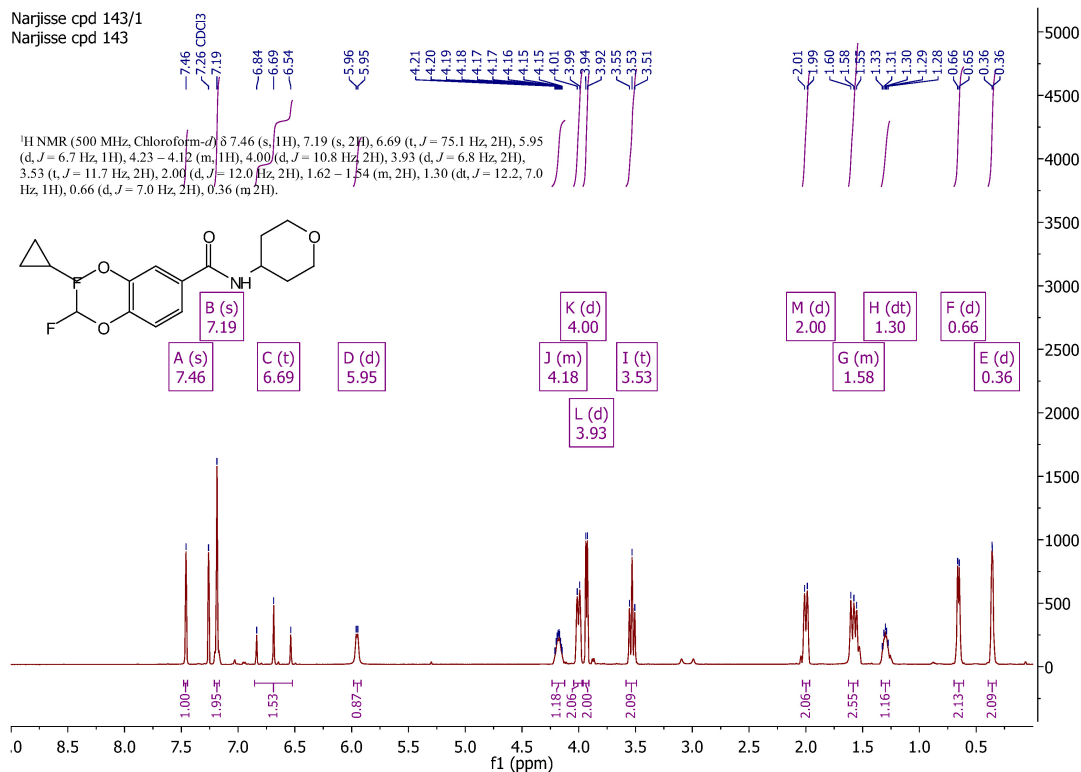

Figure S169 <sup>1</sup>H NMR spectrum of compound NPD-3007

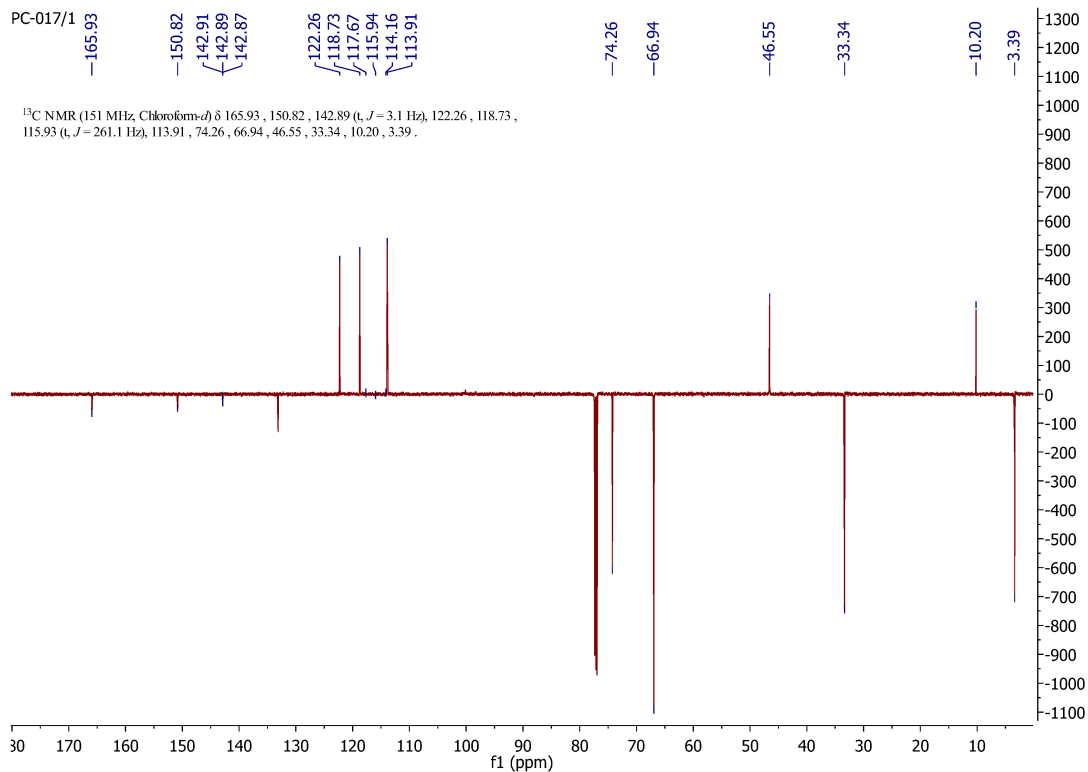

Figure S170 <sup>13</sup>C NMR spectrum of compound NPD-3007

Acquired by : Admin  
 Date Acquired : 4/19/2017 10:40:22 AM  
 Sample Name : YAZH01-079-3  
 Sample ID :  
 Tray# : 1  
 Vial# : 18  
 Injection Volume : 1  
 Data File : C:\LabSolutions\Data\2017\2017-wk16\YAZH01-079-3.lcd  
 Background File : blanco 19042017.lcd  
 Method File : Method SCAN ACID standard.lcm  
 Report Format : DefaultL.CMS.lcr  
 Tuning File : C:\LabSolutions\Tuning\Tuning-ESI-pos-neg01072015a.lct  
 Processed by : Admin  
 Modified Date : 4/19/2017 11:08:57 AM

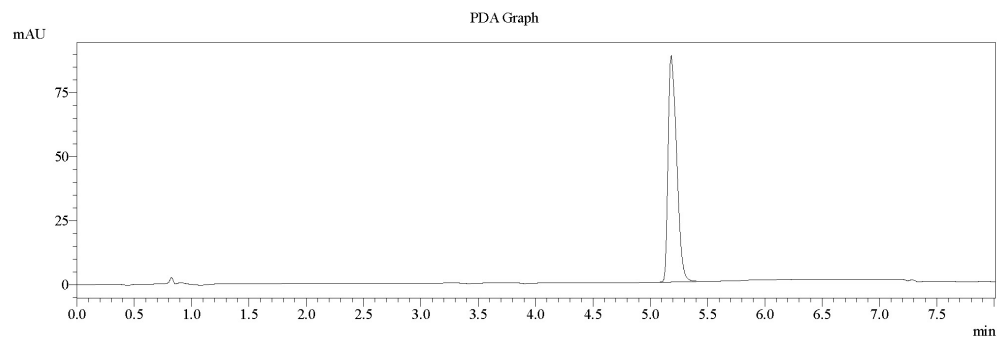

PDA Ch1 254nm 4nm

| Peak# | Name | Ret. Time | Area   | Area %  |
|-------|------|-----------|--------|---------|
| 1     |      | 5.178     | 460616 | 100.000 |

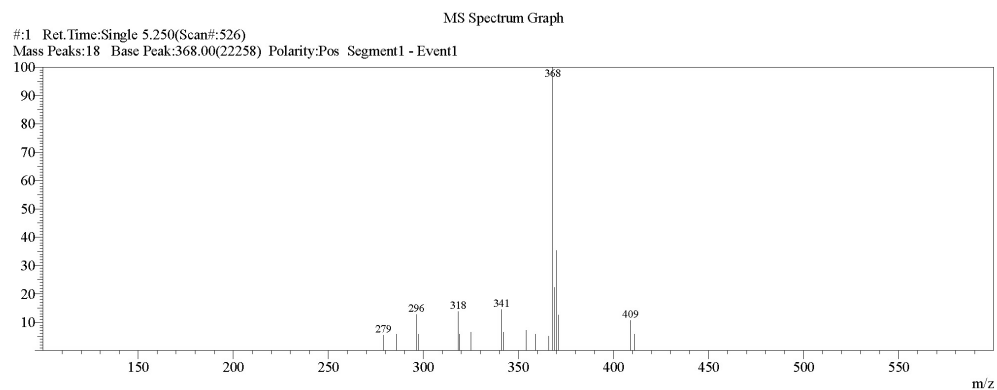

MS Spectrum Table

#1 Ret.Time:  
BG Mode:None

Mass Peaks:18 Base Peak:368.00(22258) Polarity:Pos Segment1 - Event1

| # | m/z    | Abs.Inten. | Rel.Inten. | Charge | Polarity | Monoisotopic | #  | m/z    | Abs.Inten. | Rel.Inten. | Charge | Polarity | Monoisotopic |
|---|--------|------------|------------|--------|----------|--------------|----|--------|------------|------------|--------|----------|--------------|
| 1 | 278.85 | 1220       | 5.48       |        |          |              | 10 | 354.10 | 1616       | 7.26       |        |          |              |
| 2 | 285.85 | 1285       | 5.77       |        |          |              | 11 | 359.10 | 1286       | 5.78       |        |          |              |
| 3 | 296.20 | 2831       | 12.72      |        |          |              | 12 | 366.10 | 1123       | 5.05       |        |          |              |
| 4 | 297.20 | 1297       | 5.83       |        |          |              | 13 | 368.00 | 22258      | 100.00     |        |          |              |
| 5 | 318.20 | 3083       | 13.85      |        |          |              | 14 | 369.15 | 4968       | 22.32      |        |          |              |
| 6 | 319.15 | 1303       | 5.85       |        |          |              | 15 | 370.05 | 7876       | 35.39      |        |          |              |
| 7 | 325.15 | 1431       | 6.43       |        |          |              | 16 | 371.00 | 2806       | 12.61      |        |          |              |
| 8 | 341.15 | 3222       | 14.48      |        |          |              | 17 | 408.95 | 2369       | 10.64      |        |          |              |
| 9 | 342.15 | 1463       | 6.57       |        |          |              | 18 | 410.95 | 1282       | 5.76       |        |          |              |

Figure S171 LCMS spectrum of compound NPD-3075

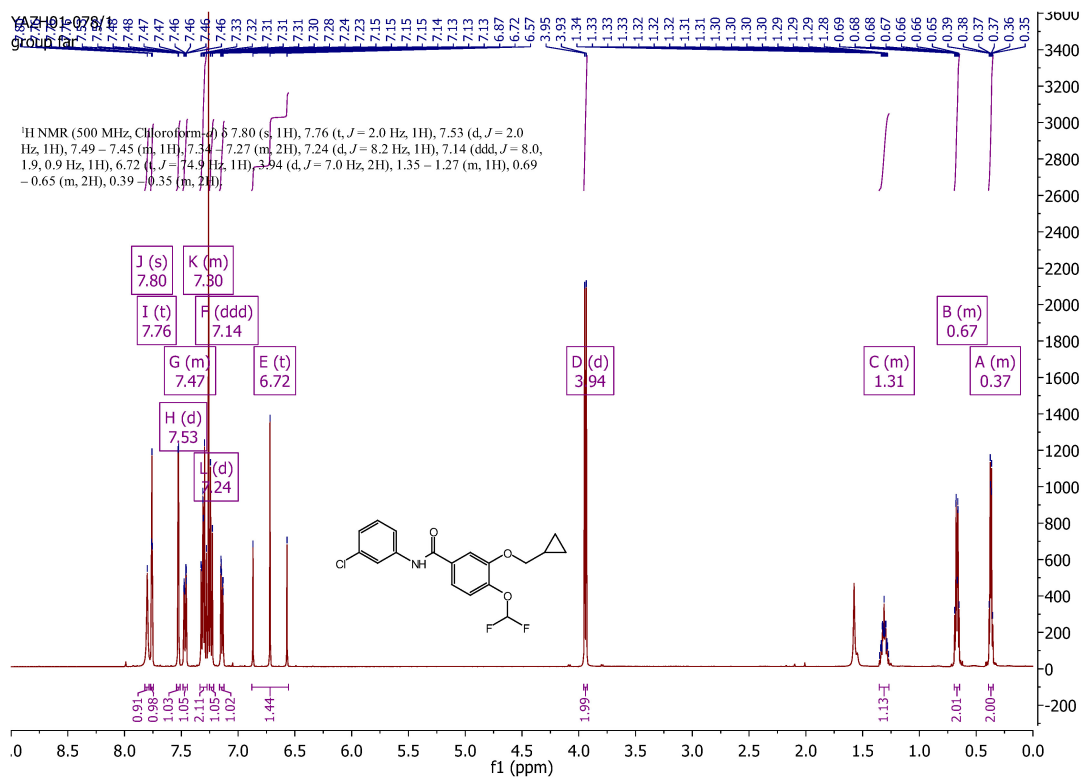

Figure S172 <sup>1</sup>H NMR spectrum of compound NPD-3075

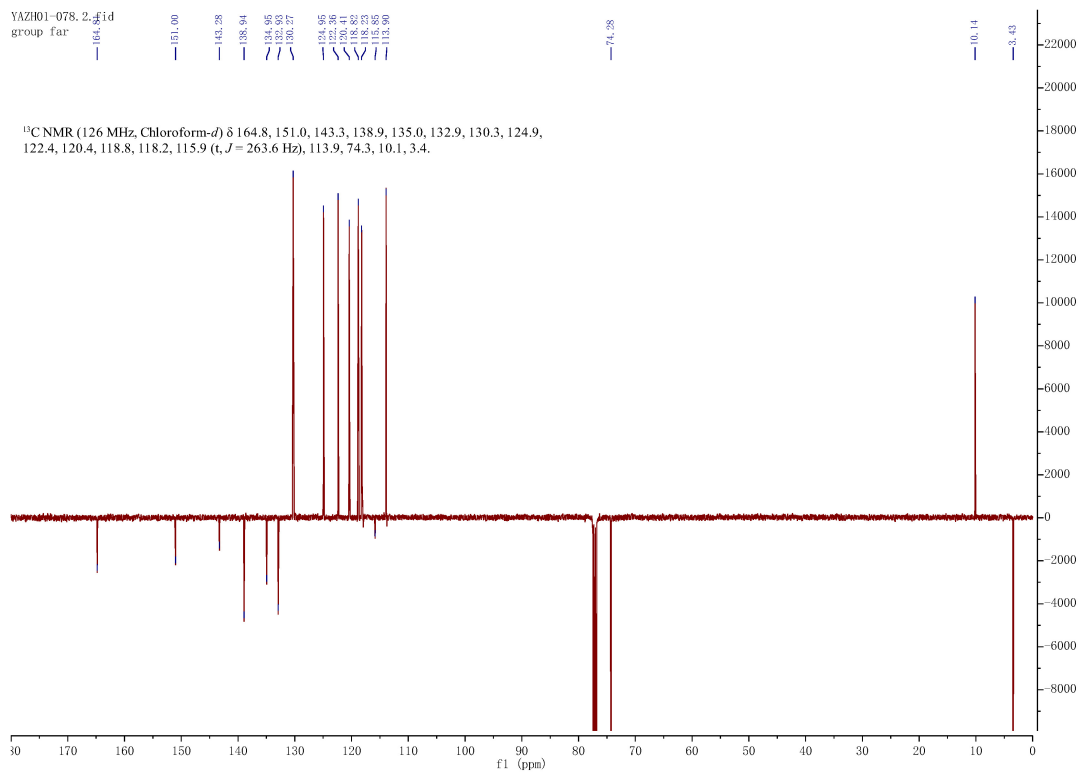

Figure S173 <sup>13</sup>C NMR spectrum of compound NPD-3075

Acquired by : Admin  
Date Acquired : 12/5/2017 11:50:26 AM  
Sample Name : YAZH01-079  
Sample ID :  
Tray# : 1  
Vial# : 22  
Injection Volume : 1  
Data File : C:\LabSolutions\Data\2017-wk19\YAZH01-079.lcd  
Background File : blanco 12052017.lcd  
Method File : Method SCAN ACID standard.lcm  
Report Format : DefaultL.CMS.lcr  
Tuning File : C:\LabSolutions\Tuning\Tuning-ESI-pos-neg01072015a.lct  
Processed by : Admin  
Modified Date : 14/6/2019 12:10:57 PM

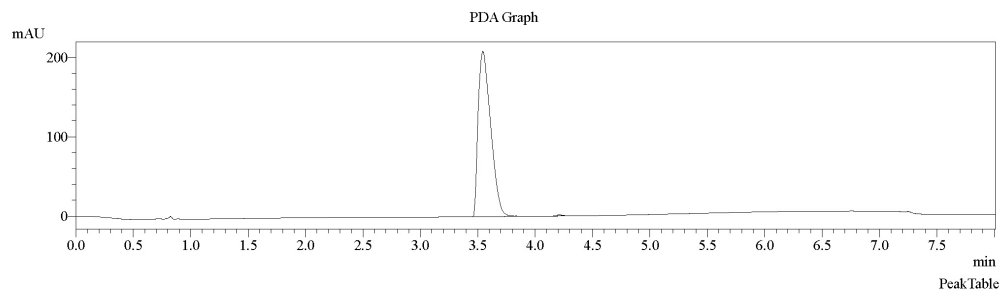

| Peak# | Name | Ret. Time | Area    | Area % |
|-------|------|-----------|---------|--------|
| 1     |      | 3.539     | 1584592 | 99.557 |
| 2     |      | 4.205     | 7059    | 0.443  |

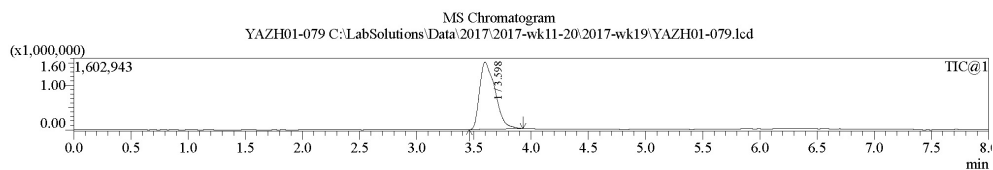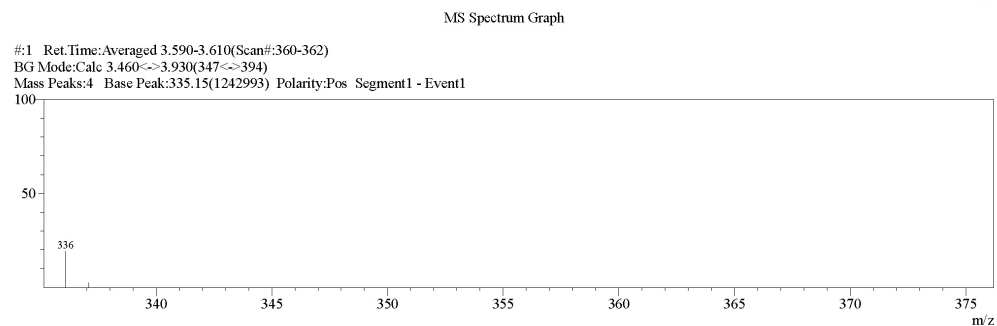

MS Spectrum Table

#1 Ret.Time:  
BG Mode:Calc 3.460<=>3.930(347<=>394)  
Mass Peaks:4 Base Peak:335.15(1242993) Polarity:Pos Segment1 - Event1

| # | m/z    | Abs.Inten. | Rel.Inten. | Charge | Polarity | Monoisotopic | # | m/z    | Abs.Inten. | Rel.Inten. | Charge | Polarity | Monoisotopic |
|---|--------|------------|------------|--------|----------|--------------|---|--------|------------|------------|--------|----------|--------------|
| 1 | 335.15 | 1242993    | 100.00     |        |          |              | 3 | 337.10 | 29418      | 2.37       |        |          |              |
| 2 | 336.10 | 238815     | 19.21      |        |          |              | 4 | 376.20 | 30999      | 2.49       |        |          |              |

Figure S174 LCMS spectrum of compound NPD-3076

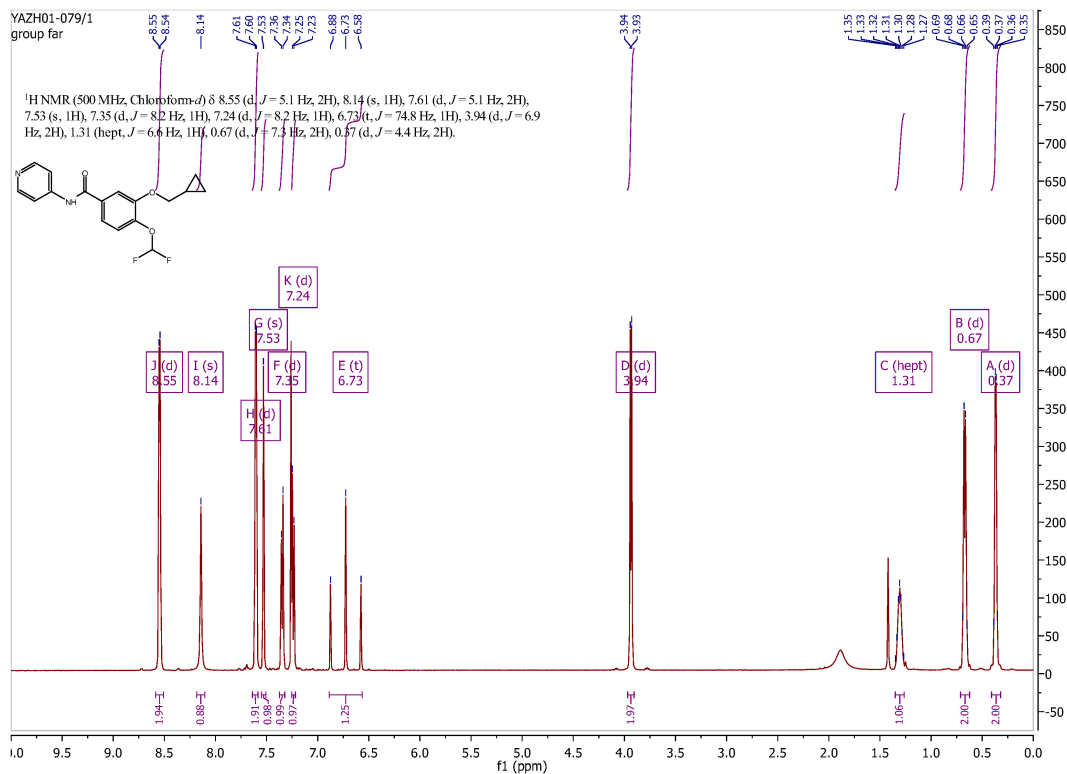

Figure S175 <sup>1</sup>H NMR spectrum of compound NPD-3076

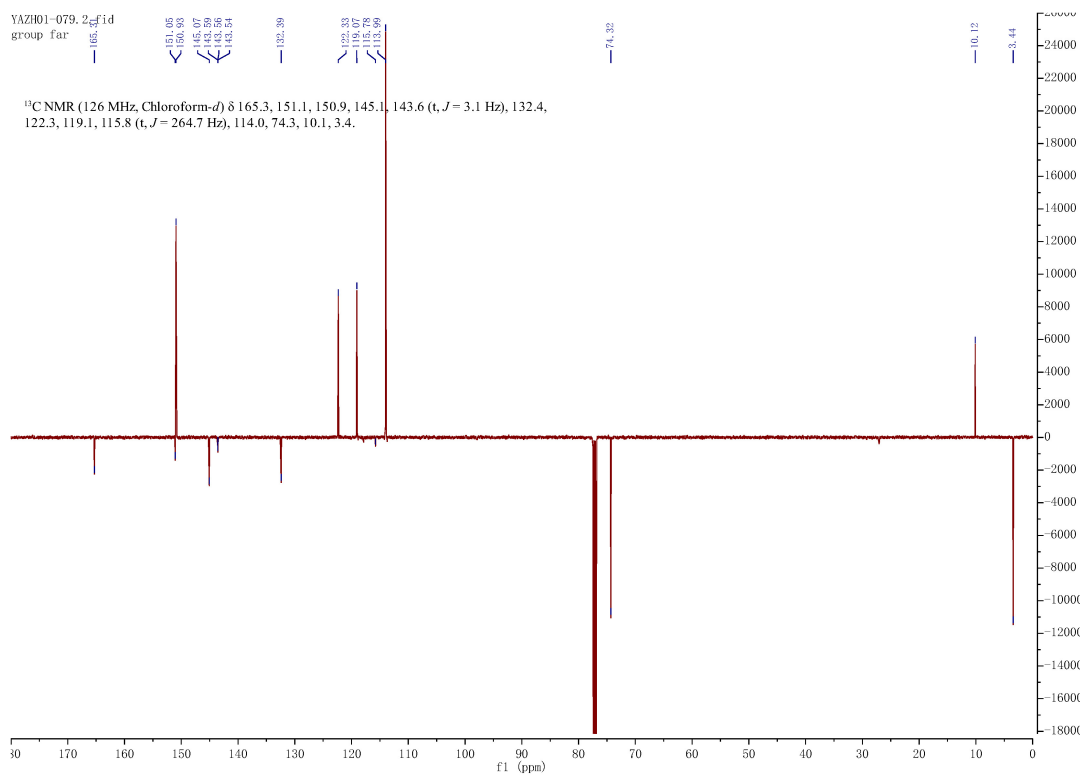

Figure S176 <sup>13</sup>C NMR spectrum of compound NPD-3076

Acquired by : Admin  
Date Acquired : 4/24/2017 10:17:07 AM  
Sample Name : YAZH01-084  
Sample ID :  
Tray# : 1  
Vial# : 15  
Injection Volume : 1  
Data File : C:\LabSolutions\Data\2017\2017-wk17\YAZH01-084.lcd  
Background File : blanco 24042017.lcd  
Method File : Method SCAN ACID standard.lcm  
Report Format : Default.LCMS.rpt  
Tuning File : C:\LabSolutions\Tuning\Tuning-ESI-pos-neg01072015a.lct  
Processed by : Admin  
Modified Date : 4/24/2017 12:09:47 PM

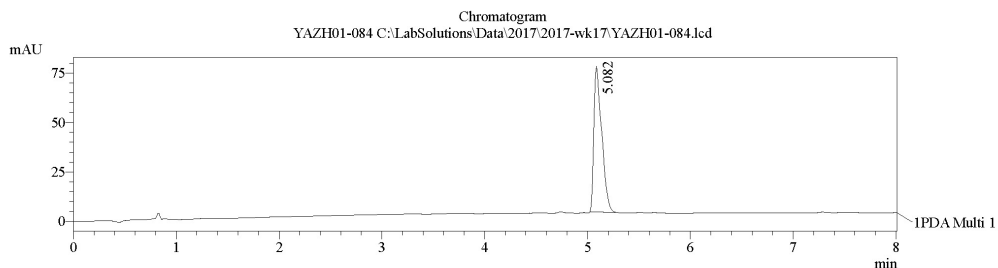

PDA Ch1 254nm 4nm

| Peak# | Name | Ret. Time | Area   | Area %  |
|-------|------|-----------|--------|---------|
| 1     |      | 5.082     | 386966 | 100.000 |

Peak Table

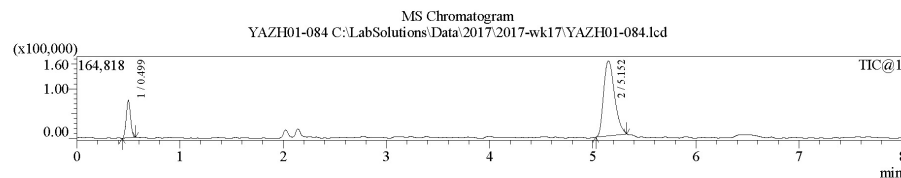

MS Spectrum Graph

#1 Ret.Time:Averaged 5.140-5.160(Scan#:515-517)

Mass Peaks:17 Base Peak:368.05(79748) Polarity:Pos Segment1 - Event1

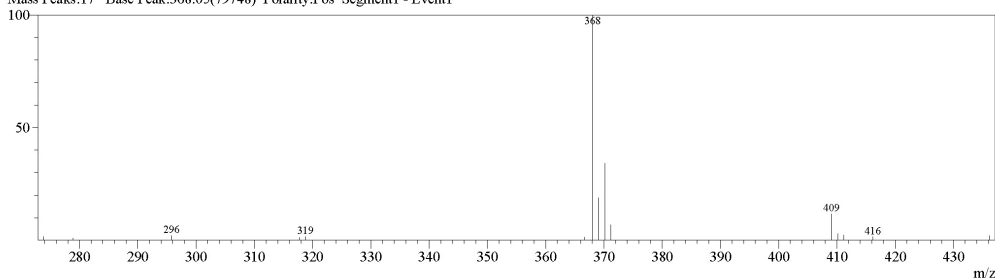

MS Spectrum Table

#1 Ret.Time:

BG Mode:Calc 5.030<->5.330(504<->534)

Mass Peaks:17 Base Peak:368.05(79748) Polarity:Pos Segment1 - Event1

| # | m/z    | Abs.Inten. | Rel.Inten. | Charge | Polarity | Monoisotopic | #  | m/z    | Abs.Inten. | Rel.Inten. | Charge | Polarity | Monoisotopic |
|---|--------|------------|------------|--------|----------|--------------|----|--------|------------|------------|--------|----------|--------------|
| 1 | 272.85 | 1747       | 2.19       |        |          |              | 9  | 369.05 | 15089      | 18.92      |        |          |              |
| 2 | 273.85 | 1303       | 1.63       |        |          |              | 10 | 370.15 | 27281      | 34.21      |        |          |              |
| 3 | 278.85 | 828        | 1.04       |        |          |              | 11 | 371.20 | 5504       | 6.90       |        |          |              |
| 4 | 295.80 | 1617       | 2.03       |        |          |              | 12 | 409.05 | 9311       | 11.68      |        |          |              |
| 5 | 317.80 | 932        | 1.17       |        |          |              | 13 | 410.15 | 2387       | 2.99       |        |          |              |
| 6 | 318.75 | 1363       | 1.71       |        |          |              | 14 | 411.15 | 1756       | 2.20       |        |          |              |
| 7 | 366.70 | 1133       | 1.42       |        |          |              | 15 | 416.15 | 1230       | 1.54       |        |          |              |
| 8 | 368.05 | 79748      | 100.00     |        |          |              | 16 | 436.20 | 1718       | 2.15       |        |          |              |

Figure S177 LCMS spectrum of compound NPD-3080

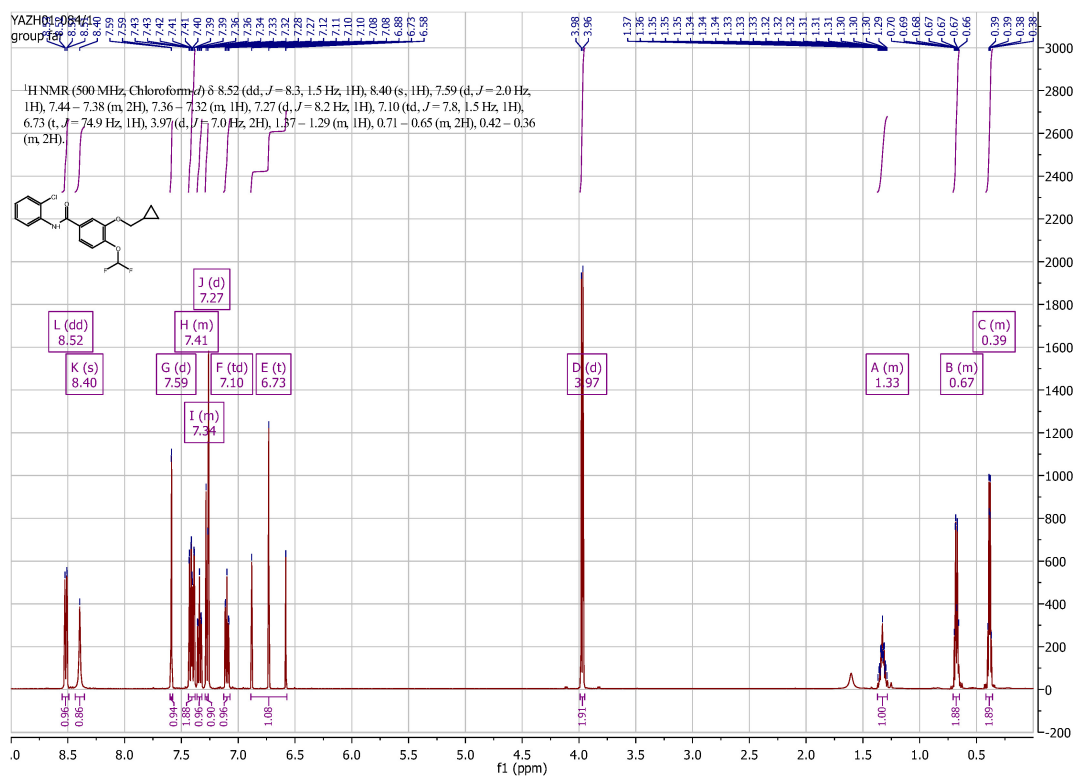

Figure S178 <sup>1</sup>H NMR spectrum of compound NPD-3080

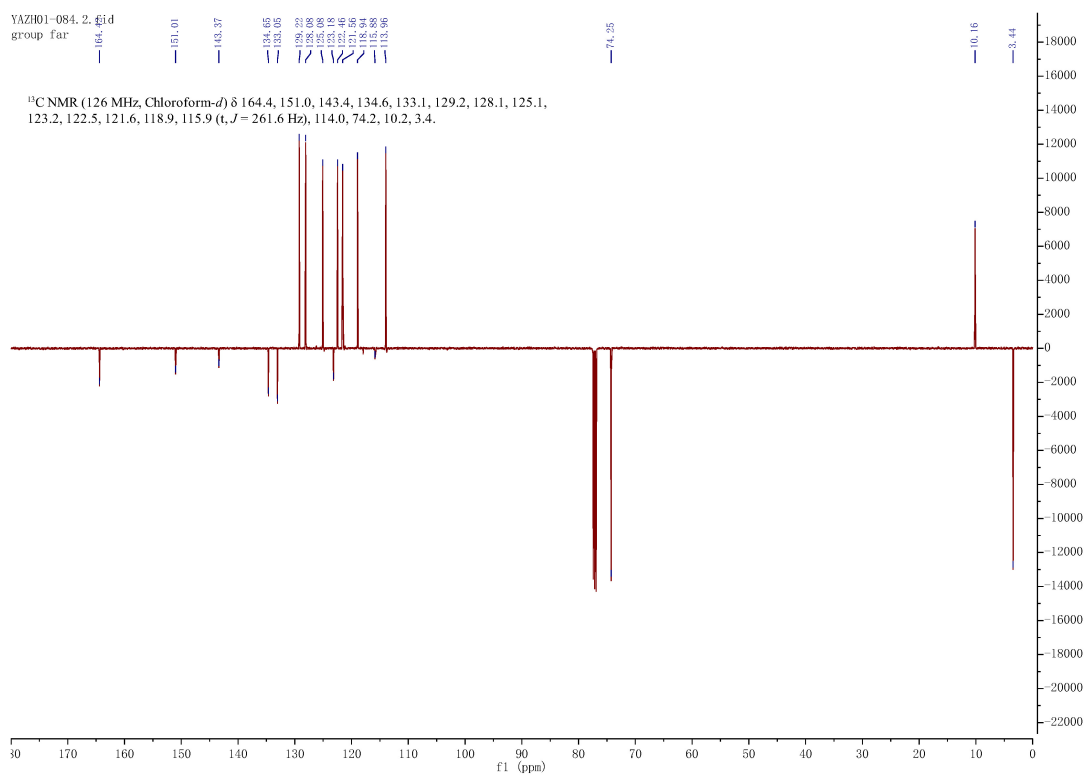

Figure S179 <sup>13</sup>C NMR spectrum of compound NPD-3080



Acquired by : Admin  
 Date Acquired : 12/5/2017 12:07:39 PM  
 Sample Name : YAZH01-088  
 Sample ID :  
 Tray# : 1  
 Vial# : 23  
 Injection Volume : 1  
 Data File : C:\LabSolutions\Data\2017\2017-wk19\YAZH01-088.lcd  
 Background File : blanco 12052017.lcd  
 Method File : Method SCAN ACID standard.lcm  
 Report Format : DefaultL.CMS.lcr  
 Tuning File : C:\LabSolutions\Tuning\Tuning-ESI-pos-neg01072015a.lct  
 Processed by : Admin  
 Modified Date : 10/5/2019 1:04:48 PM

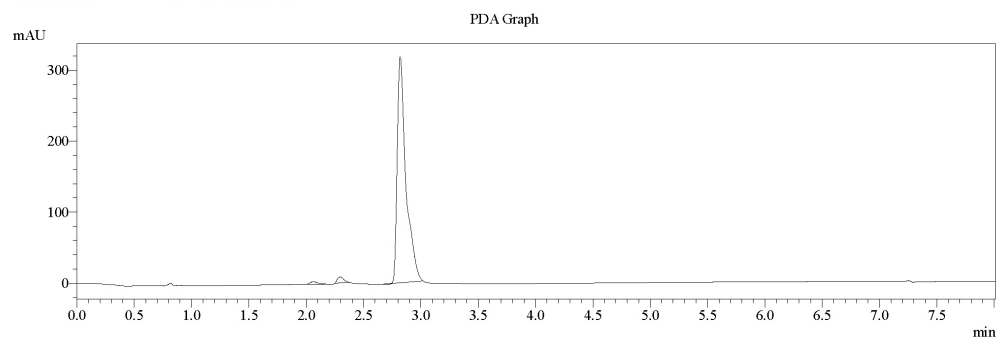

PDA Ch1 254nm 4nm

| Peak # | Name | Ret. Time | Area    | Area % |
|--------|------|-----------|---------|--------|
| 1      |      | 2.055     | 16150   | 0.935  |
| 2      |      | 2.290     | 30545   | 1.769  |
| 3      |      | 2.815     | 1680226 | 97.296 |

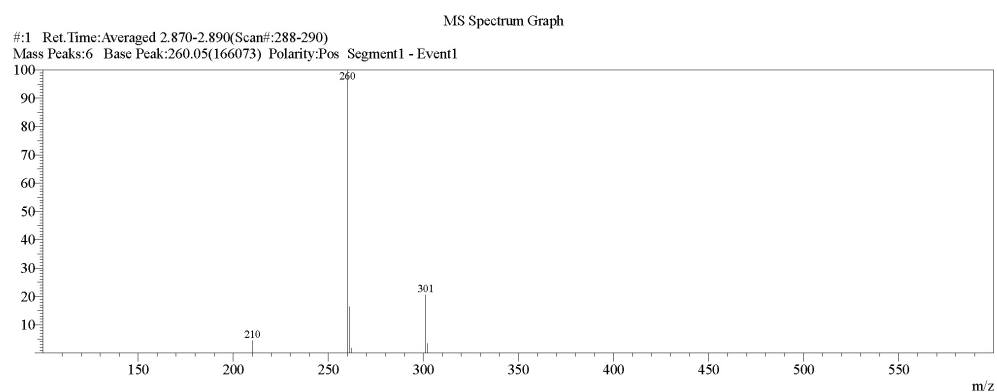

MS Spectrum Table

#1 Ret.Time:  
 BG Mode:Calc 2.770<->3.100(278<->311)  
 Mass Peaks:6 Base Peak:260.05(166073) Polarity:Pos Segment1 - Event1

| # | m/z    | Abs.Inten. | Rel.Inten. | Charge | Polarity | Monoisotopic | # | m/z    | Abs.Inten. | Rel.Inten. | Charge | Polarity | Monoisotopic |
|---|--------|------------|------------|--------|----------|--------------|---|--------|------------|------------|--------|----------|--------------|
| 1 | 209.90 | 7420       | 4.47       |        |          |              | 4 | 262.15 | 3063       | 1.84       |        |          |              |
| 2 | 260.05 | 166073     | 100.00     |        |          |              | 5 | 301.10 | 34183      | 20.58      |        |          |              |
| 3 | 261.10 | 27240      | 16.40      |        |          |              | 6 | 302.20 | 5541       | 3.34       |        |          |              |

**Figure S180 LCMS spectrum of compound NPD-3081**

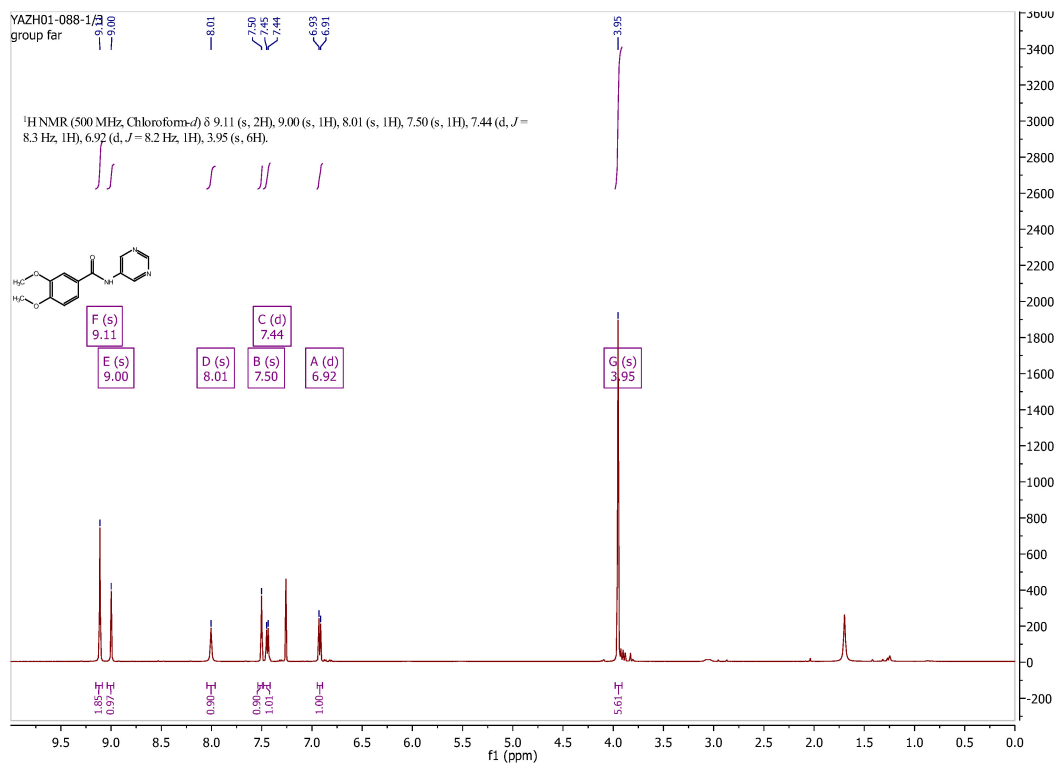

Figure S181  $^1\text{H}$  NMR spectrum of compound NPD-3081

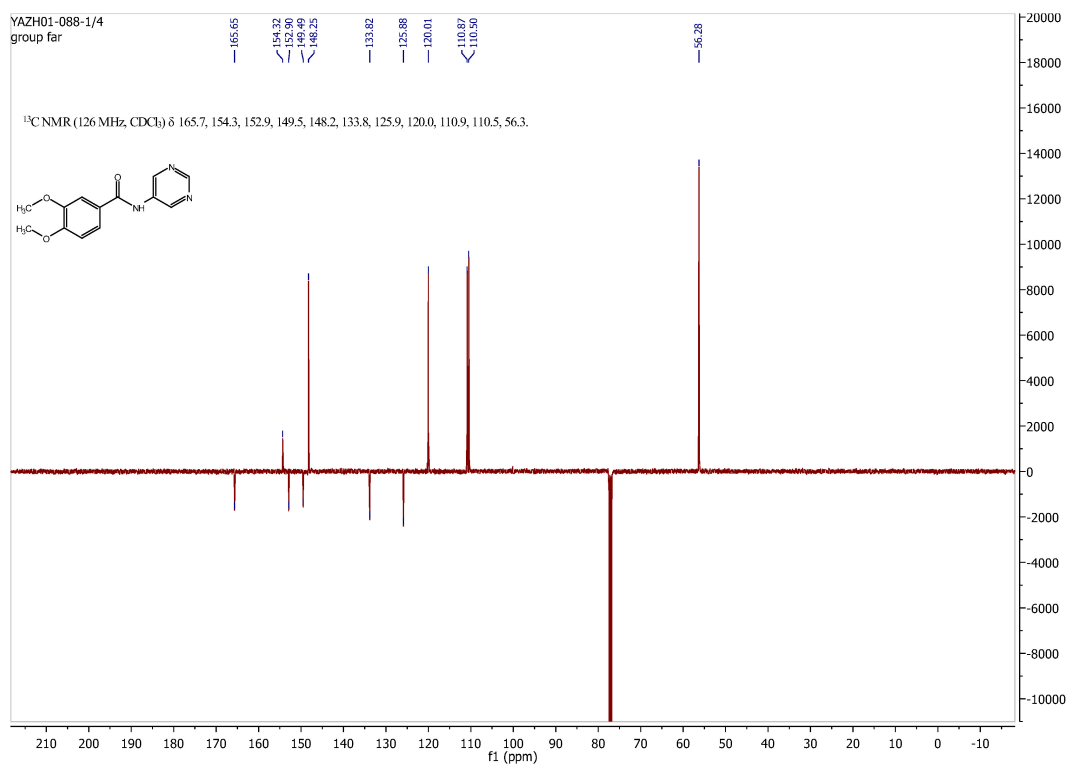

Figure S182  $^{13}\text{C}$  NMR spectrum of compound NPD-3081

Acquired by : Admin  
 Date Acquired : 12/6/2019 11:20:23 AM  
 Sample Name : YAZH01-090  
 Sample ID :  
 Tray# : 1  
 Vial# : 8  
 Injection Volume : 1  
 Data File : C:\LabSolutions\Data\2019-wk24\YAZH01-090.lcd  
 Background File : Blanco12062019.lcd  
 Method File : Method SCAN ACID standard.lcm  
 Report Format : DefaultL.CMS.lcr  
 Tuning File : C:\LabSolutions\Tuning\Tuning-ESI-pos-neg01072015a.lct  
 Processed by : Admin  
 Modified Date : 12/6/2019 1:32:15 PM

Medicinal Chemistry  
 Vrije Universiteit Amsterdam

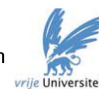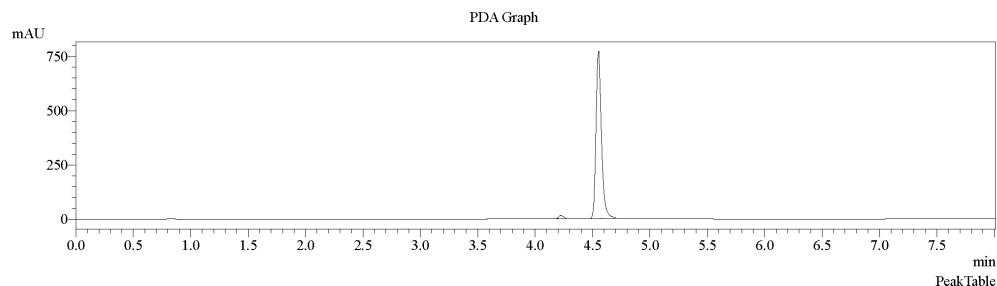

PDA Ch1 254nm 4nm

| Peak# | Name | Ret. Time | Area    | Area % |
|-------|------|-----------|---------|--------|
| 1     |      | 4.219     | 49829   | 1.939  |
| 2     |      | 4.546     | 2520313 | 98.061 |

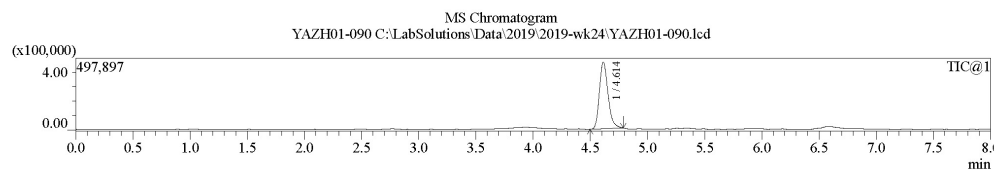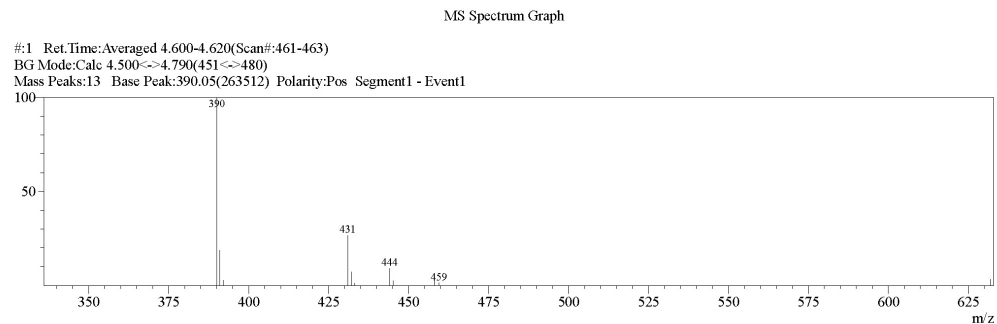

MS Spectrum Table

#1 Ret.Time:  
 BG Mode:Calc 4.500<=>4.790(451<=>480)  
 Mass Peaks:13 Base Peak:390.05(263512) Polarity:Pos Segment1 - Event1

| #  | m/z    | Abs.Inten. | Rel.Inten. | Charge | Polarity | Monoisotopic |
|----|--------|------------|------------|--------|----------|--------------|
| 1  | 336.00 | 4295       | 1.63       |        |          |              |
| 2  | 390.05 | 263512     | 100.00     |        |          |              |
| 3  | 391.05 | 49449      | 18.77      |        |          |              |
| 4  | 392.15 | 6842       | 2.60       |        |          |              |
| 5  | 431.05 | 70092      | 26.60      |        |          |              |
| 6  | 432.10 | 18744      | 7.11       |        |          |              |
| 7  | 433.10 | 3133       | 1.19       |        |          |              |
| 8  | 444.15 | 23916      | 9.08       |        |          |              |
| 9  | 445.20 | 6710       | 2.55       |        |          |              |
| 10 | 458.15 | 8657       | 3.29       |        |          |              |
| 11 | 459.50 | 3424       | 1.30       |        |          |              |
| 12 | 631.95 | 8285       | 3.14       |        |          |              |
| 13 | 632.90 | 2853       | 1.08       |        |          |              |

Figure S183 LCMS spectrum of compound NPD-3083

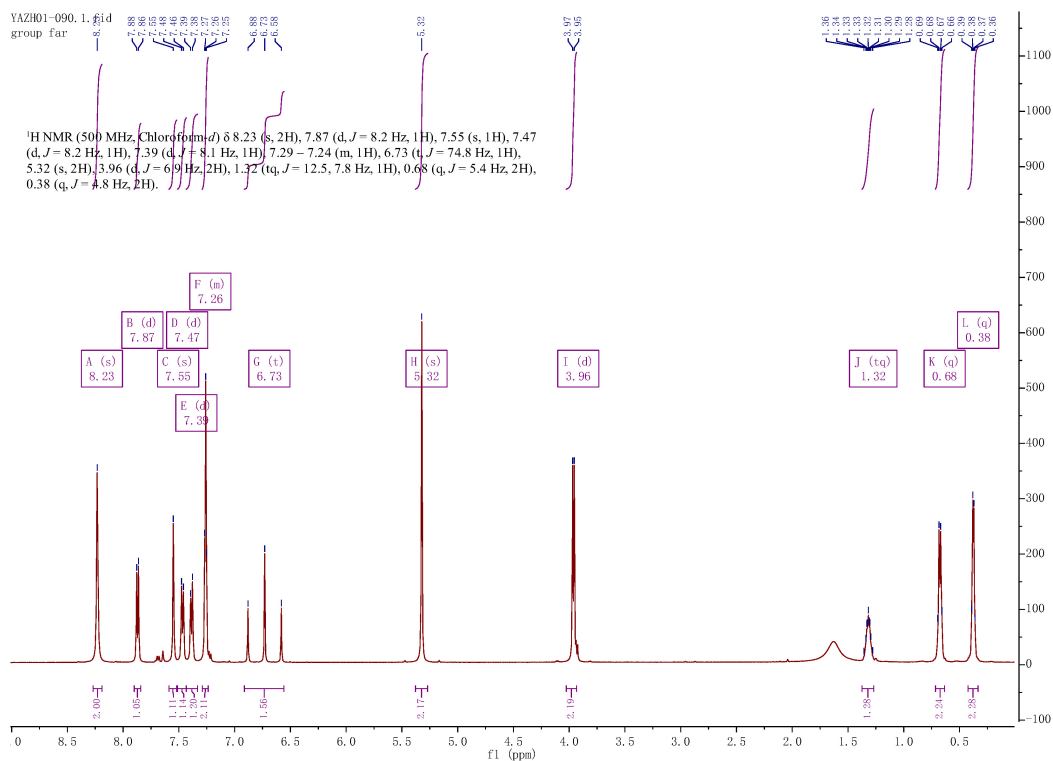

Figure S184  $^1\text{H}$  NMR spectrum of compound NPD-3083

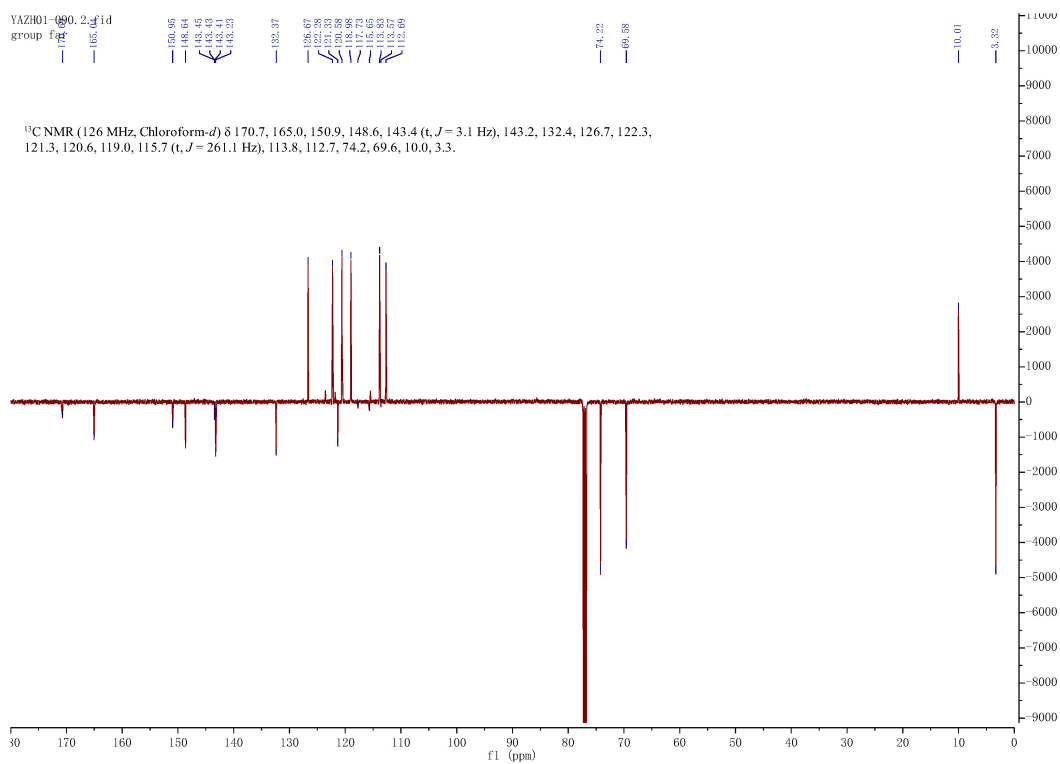

Figure S185  $^{13}\text{C}$  NMR spectrum of compound NPD-3083

Acquired by : Admin  
 Date Acquired : 5/16/2017 4:29:57 PM  
 Sample Name : YAZH01-092  
 Sample ID :  
 Tray# : 1  
 Vial# : 47  
 Injection Volume : 1  
 Data File : C:\LabSolutions\Data\2017\2017-wk20\YAZH01-092.lcd  
 Background File : blanco acid 16052017.lcd  
 Method File : Method SCAN ACID standard.lcm  
 Report Format : Default1.CMS.lcr  
 Tuning File : C:\LabSolutions\Tuning\Tuning-ESI-pos-neg01072015a.lct  
 Processed by : Admin  
 Modified Date : 5/16/2017 4:59:33 PM

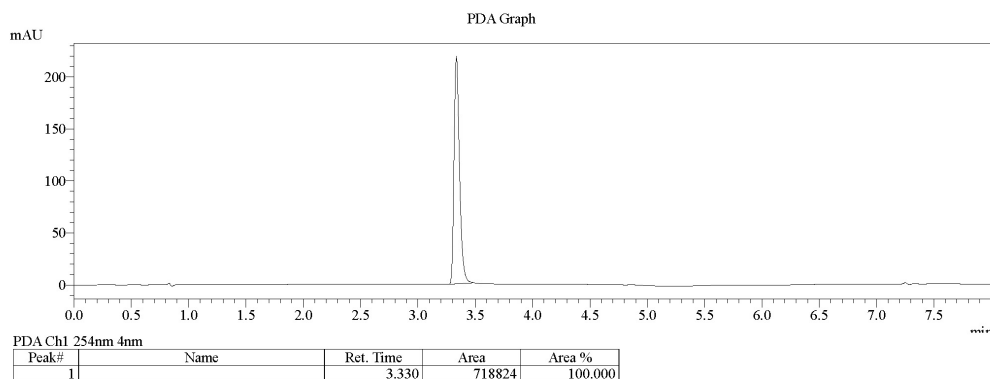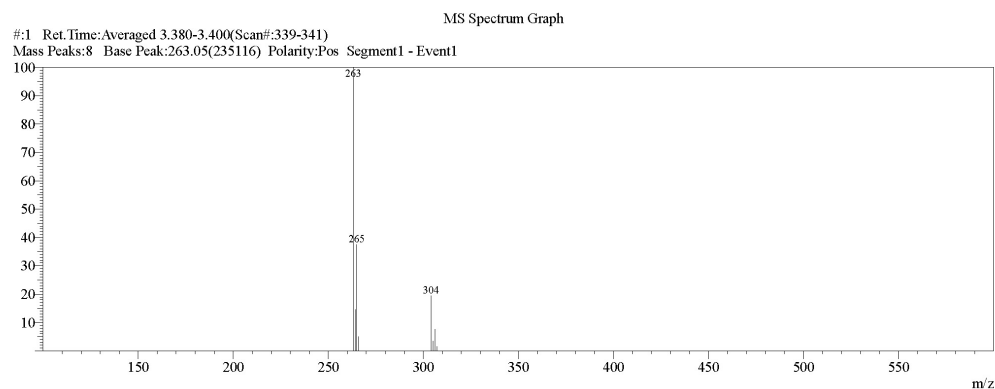

MS Spectrum Table

#1 Ret.Time:  
 BG Mode:Calc 3.280<->3.540(329<->355)  
 Mass Peaks:8 Base Peak:263.05(235116) Polarity:Pos Segment1 - Event1

| # | m/z    | Abs.Inten. | Rel.Inten. | Charge | Polarity | Monoisotopic | # | m/z    | Abs.Inten. | Rel.Inten. | Charge | Polarity | Monoisotopic |
|---|--------|------------|------------|--------|----------|--------------|---|--------|------------|------------|--------|----------|--------------|
| 1 | 263.05 | 235116     | 100.00     |        |          |              | 5 | 304.05 | 45539      | 19.37      |        |          |              |
| 2 | 264.05 | 34390      | 14.63      |        |          |              | 6 | 305.05 | 8033       | 3.42       |        |          |              |
| 3 | 265.05 | 88056      | 37.45      |        |          |              | 7 | 306.05 | 17888      | 7.61       |        |          |              |
| 4 | 266.00 | 11890      | 5.06       |        |          |              | 8 | 307.10 | 3432       | 1.46       |        |          |              |

**Figure S186 LCMS spectrum of compound NPD-3085**

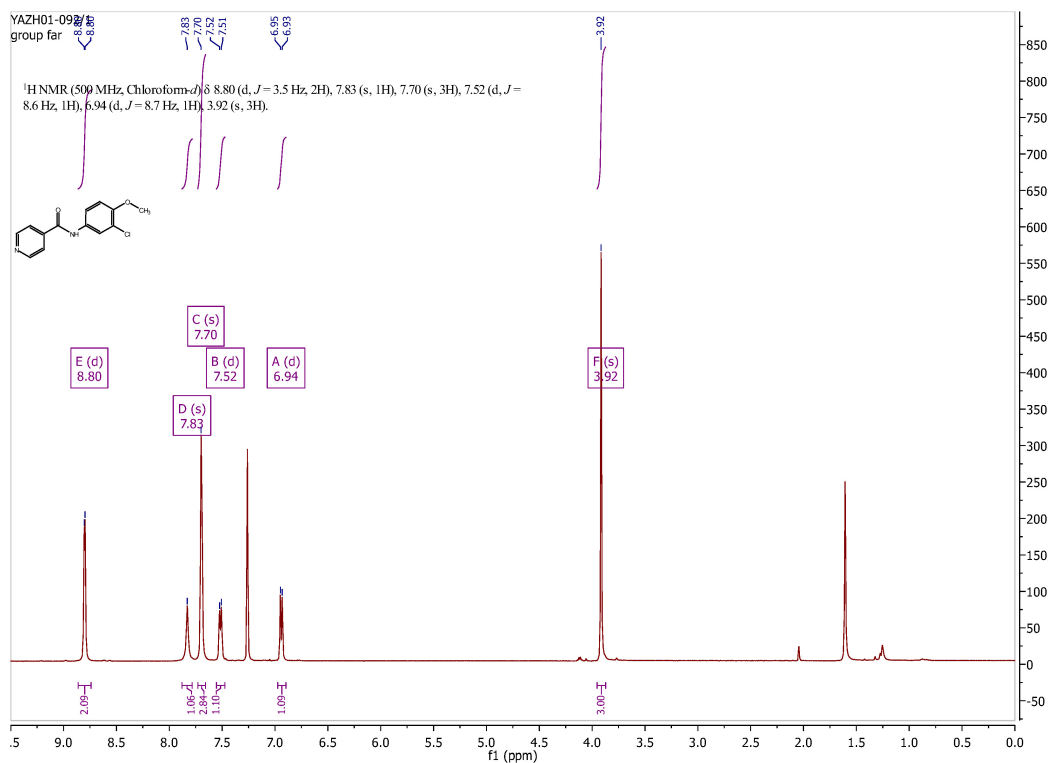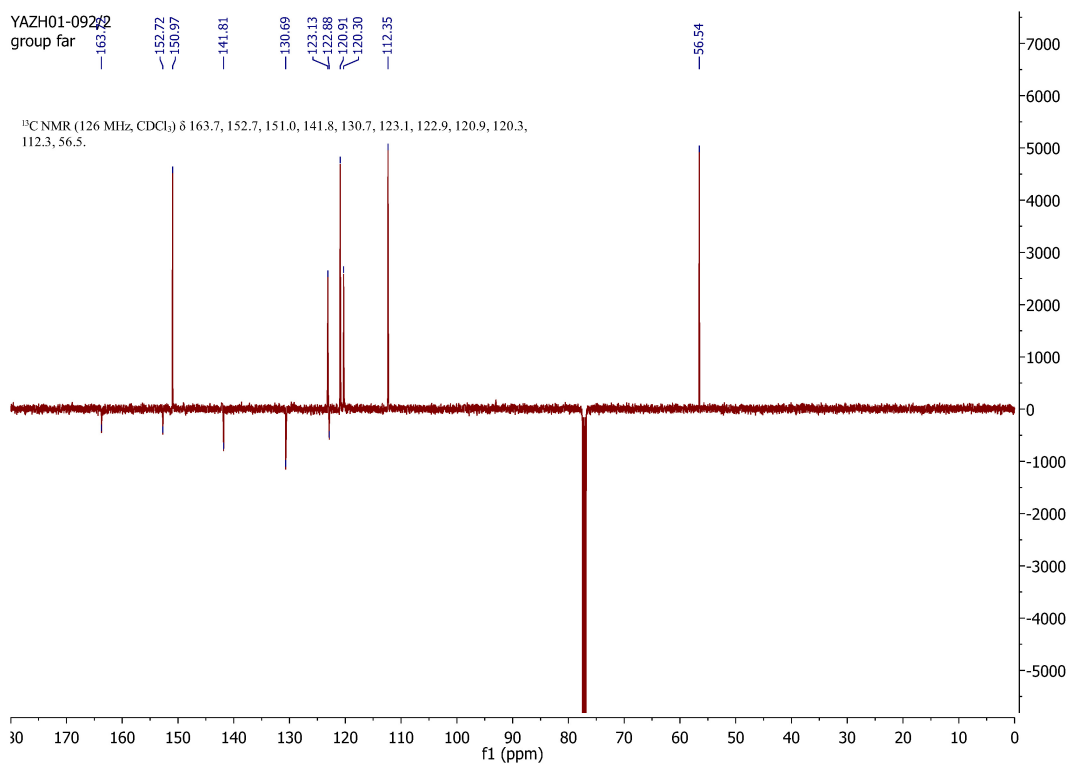

Acquired by : Admin  
Date Acquired : 5/17/2017 9:12:22 AM  
Sample Name : YAZH01-093  
Sample ID :  
Tray# : 1  
Vial# : 11  
Injection Volume : 1  
Data File : C:\LabSolutions\Data\2017\2017-wk20\YAZH01-093.lcd  
Background File : blanco17052017.lcd  
Method File : Method SCAN ACID standard.lcm  
Report Format : Default1.CMS.lcr  
Tuning File : C:\LabSolutions\Tuning\Tuning-ESI-pos-neg01072015a.lct  
Processed by : Admin  
Modified Date : 5/17/2017 9:42:43 AM

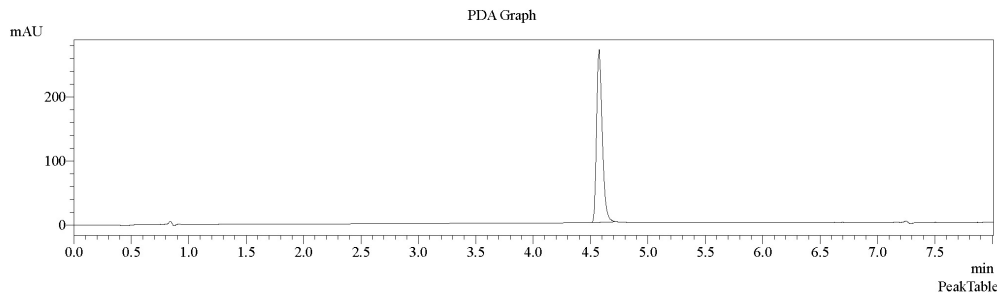

PDA Ch1 254nm 4nm

| Peak# | Name | Ret. Time | Area   | Area %  |
|-------|------|-----------|--------|---------|
| 1     |      | 4.569     | 921148 | 100.000 |

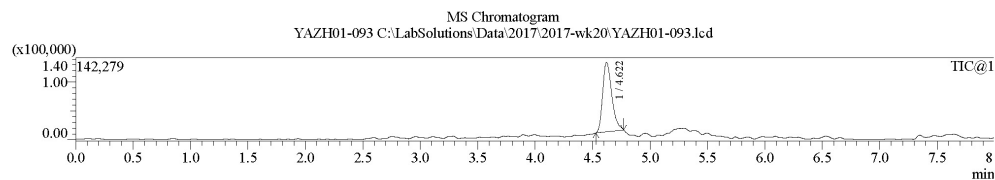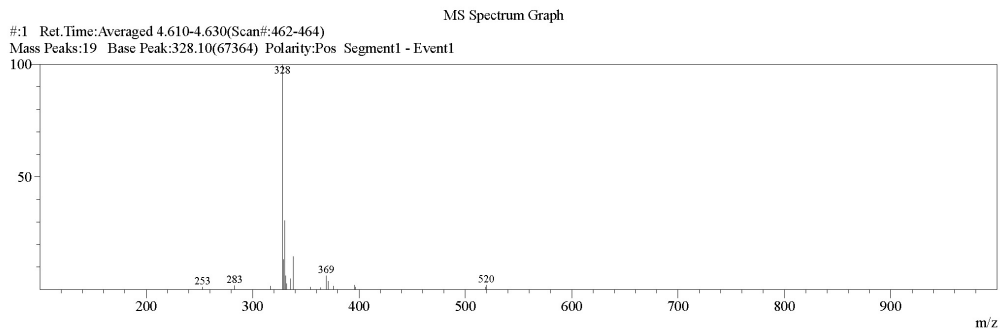

MS Spectrum Table

| #  | m/z    | Abs.Inten. | Rel.Inten. | Charge | Polarity | Monoisotopic |
|----|--------|------------|------------|--------|----------|--------------|
| 1  | 252.85 | 787        | 1.17       |        |          |              |
| 2  | 282.85 | 1206       | 1.79       |        |          |              |
| 3  | 316.80 | 1036       | 1.54       |        |          |              |
| 4  | 328.10 | 67364      | 100.00     |        |          |              |
| 5  | 329.10 | 8988       | 13.34      |        |          |              |
| 6  | 330.10 | 20637      | 30.64      |        |          |              |
| 7  | 331.20 | 4201       | 6.24       |        |          |              |
| 8  | 332.30 | 1871       | 2.78       |        |          |              |
| 9  | 336.00 | 3207       | 4.76       |        |          |              |
| 10 | 338.25 | 9871       | 14.65      |        |          |              |
| 11 | 354.25 | 850        | 1.26       |        |          |              |
| 12 | 364.25 | 689        | 1.02       |        |          |              |
| 13 | 369.25 | 4189       | 6.22       |        |          |              |
| 14 | 371.15 | 2563       | 3.80       |        |          |              |
| 15 | 376.20 | 1150       | 1.71       |        |          |              |
| 16 | 396.20 | 1321       | 1.96       |        |          |              |
| 17 | 397.05 | 737        | 1.09       |        |          |              |
| 18 | 518.95 | 727        | 1.08       |        |          |              |

Figure S189 LCMS spectrum of compound NPD-3086

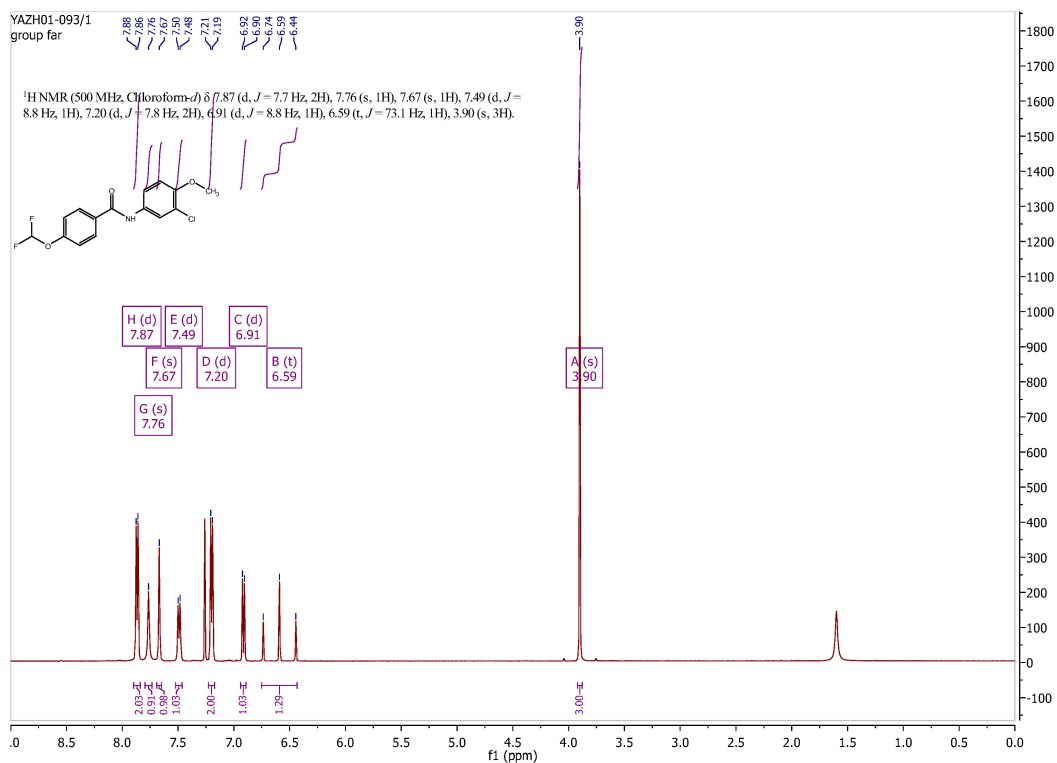

Figure S190 <sup>1</sup>H NMR spectrum of compound NPD-3086

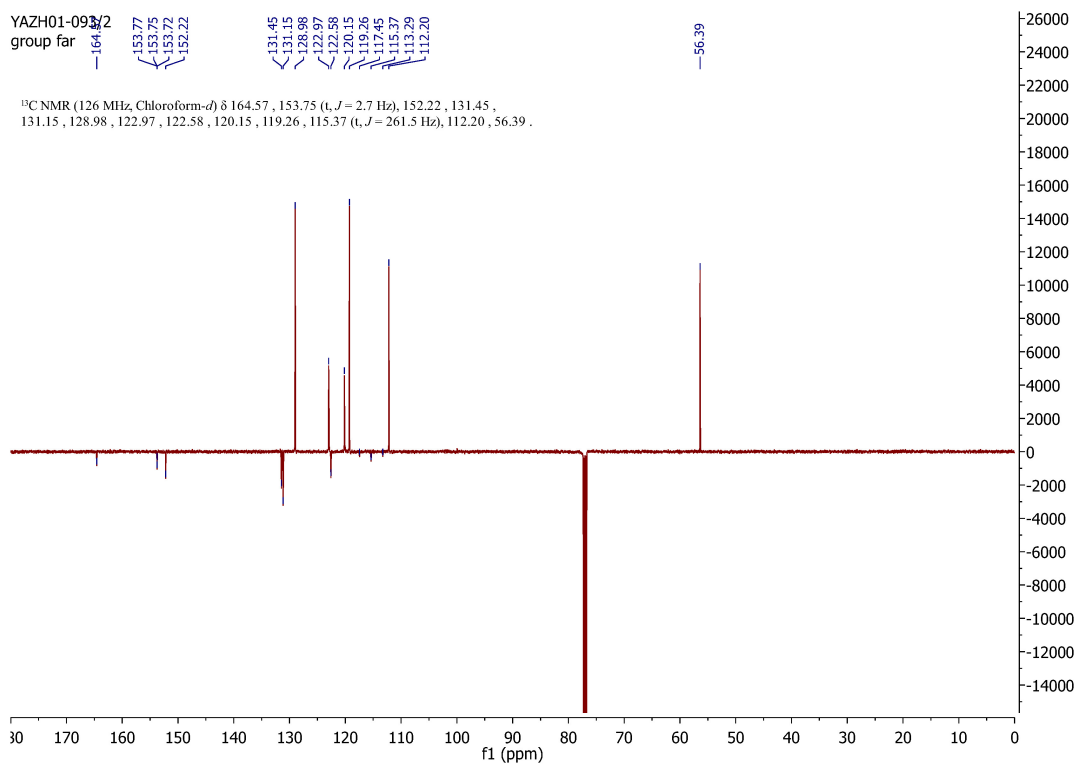

Figure S191 <sup>13</sup>C NMR spectrum of compound NPD-3086



Acquired by : Admin  
Date Acquired : 6/12/2017 11:36:26 AM  
Sample Name : YAZH01-106  
Sample ID :  
Tray# : 1  
Vial# : 23  
Injection Volume : 5  
Data File : C:\LabSolutions\Data\2017\2017-wk24\YAZH01-106.lcd  
Background File : blanco 120617.lcd  
Method File : Method SCAN ACID standard.lcm  
Report Format : DefaultL.CMS.lcr  
Tuning File : C:\LabSolutions\Tuning\Tuning-ESI-pos-neg01072015a.lct  
Processed by : Admin  
Modified Date : 6/12/2017 12:11:03 PM

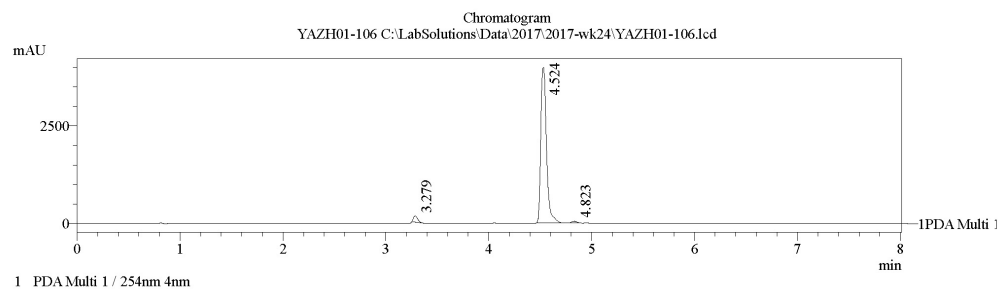

Peak Table

| Peak# | Name | Ret. Time | Area     | Area % |
|-------|------|-----------|----------|--------|
| 1     |      | 3.279     | 415054   | 2.652  |
| 2     |      | 4.524     | 15085442 | 96.406 |
| 3     |      | 4.823     | 147330   | 0.942  |

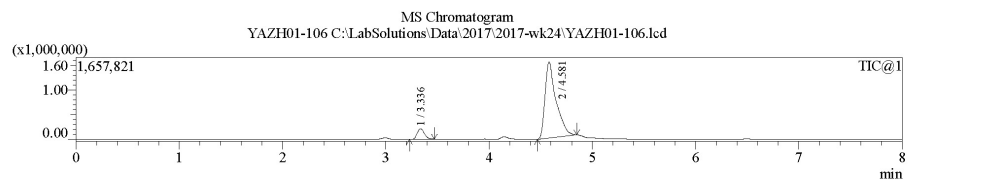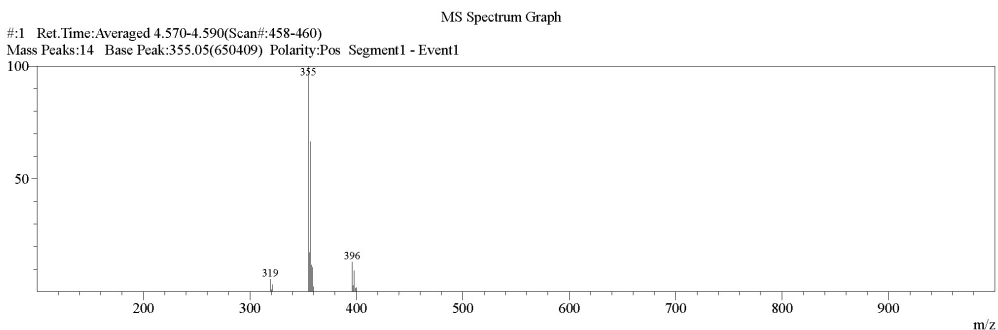

MS Spectrum Table

| #  | m/z    | Abs.Inten. | Rel.Inten. | Charge | Polarity | Monoisotopic |
|----|--------|------------|------------|--------|----------|--------------|
| 1  | 319.00 | 36020      | 5.54       |        |          |              |
| 2  | 320.10 | 6725       | 1.03       |        |          |              |
| 3  | 321.10 | 19904      | 3.06       |        |          |              |
| 4  | 355.05 | 650409     | 100.00     |        |          |              |
| 5  | 356.05 | 112147     | 17.24      |        |          |              |
| 6  | 357.05 | 432794     | 66.54      |        |          |              |
| 7  | 358.05 | 77271      | 11.88      |        |          |              |
| 8  | 359.00 | 69909      | 10.75      |        |          |              |
| 9  | 360.10 | 14187      | 2.18       |        |          |              |
| 10 | 396.05 | 85324      | 13.12      |        |          |              |
| 11 | 397.05 | 17455      | 2.68       |        |          |              |
| 12 | 398.10 | 60249      | 9.26       |        |          |              |
| 13 | 399.15 | 10412      | 1.60       |        |          |              |
| 14 | 400.10 | 11893      | 1.83       |        |          |              |

Figure S192 LCMS spectrum of compound NPD-3093

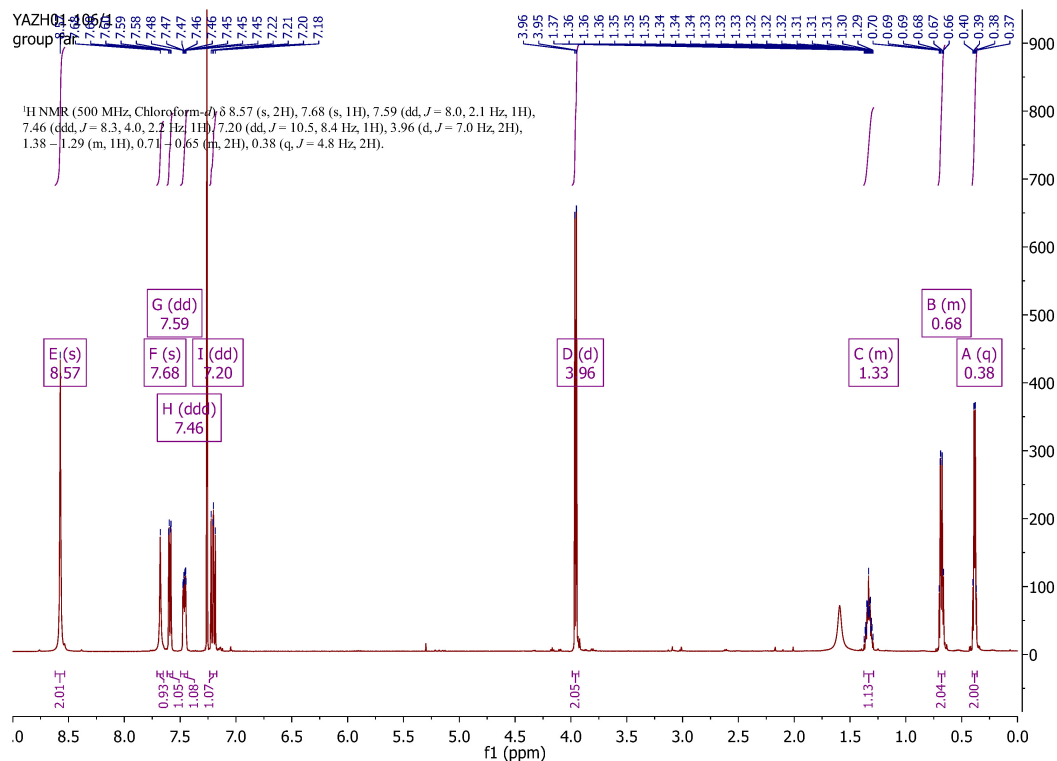

Figure S193 <sup>1</sup>H NMR spectrum of compound NPD-3093

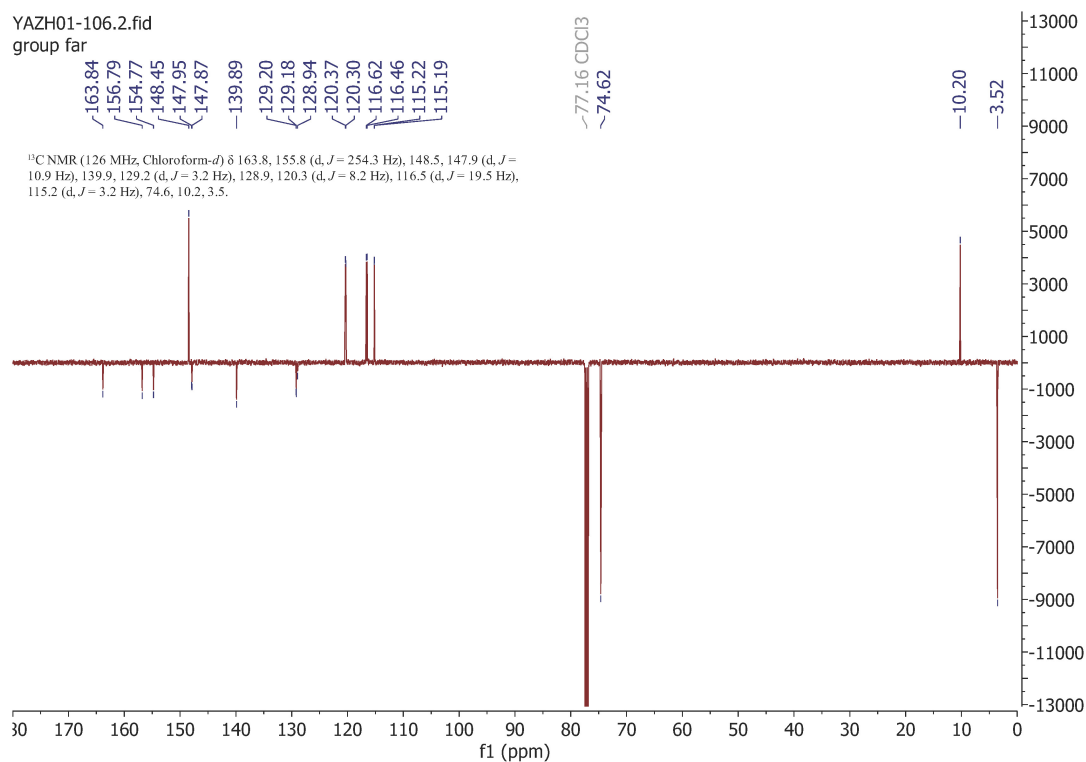

Figure S194 <sup>13</sup>C NMR spectrum of compound NPD-3093

Acquired by : Admin  
Date Acquired : 6/13/2017 11:04:21 AM  
Sample Name : YAZH01-107-17  
Sample ID :  
Tray# : 1  
Vial# : 16  
Injection Volume : 5  
Data File : C:\LabSolutions\Data\2017\2017-wk24\YAZH01-107-17.lcd  
Background File : blanco 130617.lcd  
Method File : Method SCAN ACID standard.lcm  
Report Format : DefaultLCMS.lcr  
Tuning File : C:\LabSolutions\Tuning\Tuning-ESI-pos-neg01072015a.lct  
Processed by : Admin  
Modified Date : 6/13/2017 1:43:07 PM

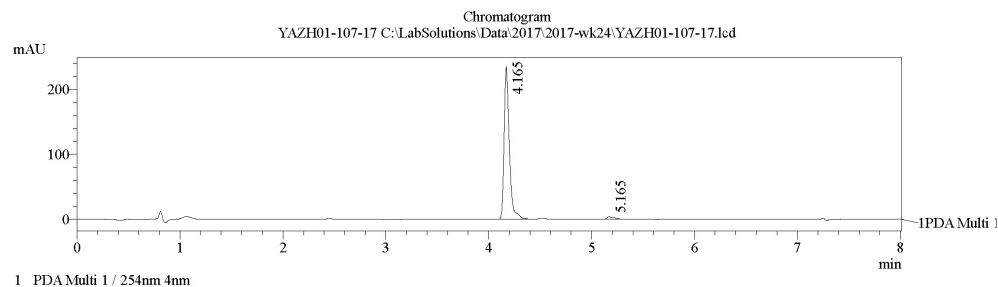

PeakTable

| Peak# | Name | Ret. Time | Area   | Area % |
|-------|------|-----------|--------|--------|
| 1     |      | 4.165     | 824927 | 97.855 |
| 2     |      | 5.165     | 18083  | 2.145  |

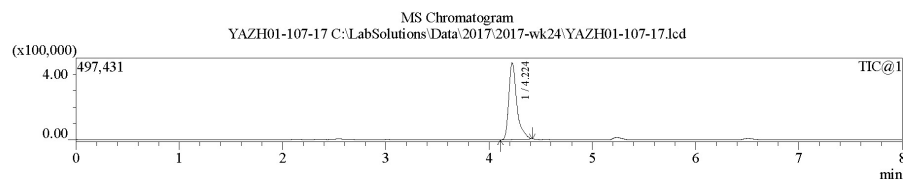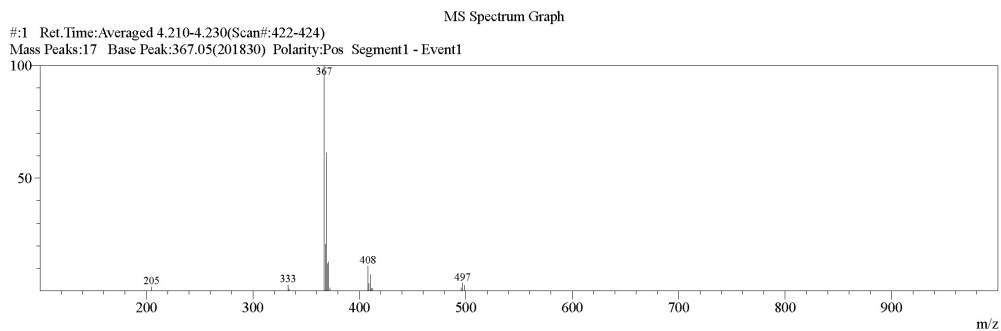

MS Spectrum Table

| #  | m/z    | Abs.Inten. | Rel.Inten. | Charge | Polarity | Monoisotopic |
|----|--------|------------|------------|--------|----------|--------------|
| 1  | 204.95 | 3679       | 1.82       |        |          |              |
| 2  | 333.10 | 5364       | 2.66       |        |          |              |
| 3  | 334.10 | 2122       | 1.05       |        |          |              |
| 4  | 367.05 | 201830     | 100.00     |        |          |              |
| 5  | 368.10 | 42127      | 20.87      |        |          |              |
| 6  | 369.05 | 123618     | 61.25      |        |          |              |
| 7  | 370.05 | 24134      | 11.96      |        |          |              |
| 8  | 371.00 | 25963      | 12.86      |        |          |              |
| 9  | 372.20 | 2827       | 1.40       |        |          |              |
| 10 | 408.15 | 22053      | 10.93      |        |          |              |
| 11 | 409.15 | 6829       | 3.38       |        |          |              |
| 12 | 410.25 | 14735      | 7.30       |        |          |              |
| 13 | 411.10 | 2372       | 1.18       |        |          |              |
| 14 | 412.55 | 2504       | 1.24       |        |          |              |
| 15 | 495.45 | 2906       | 1.44       |        |          |              |
| 16 | 496.95 | 7050       | 3.49       |        |          |              |

Figure S195 LCMS spectrum of compound NPD-3094

YAZH01-107/2  
group far

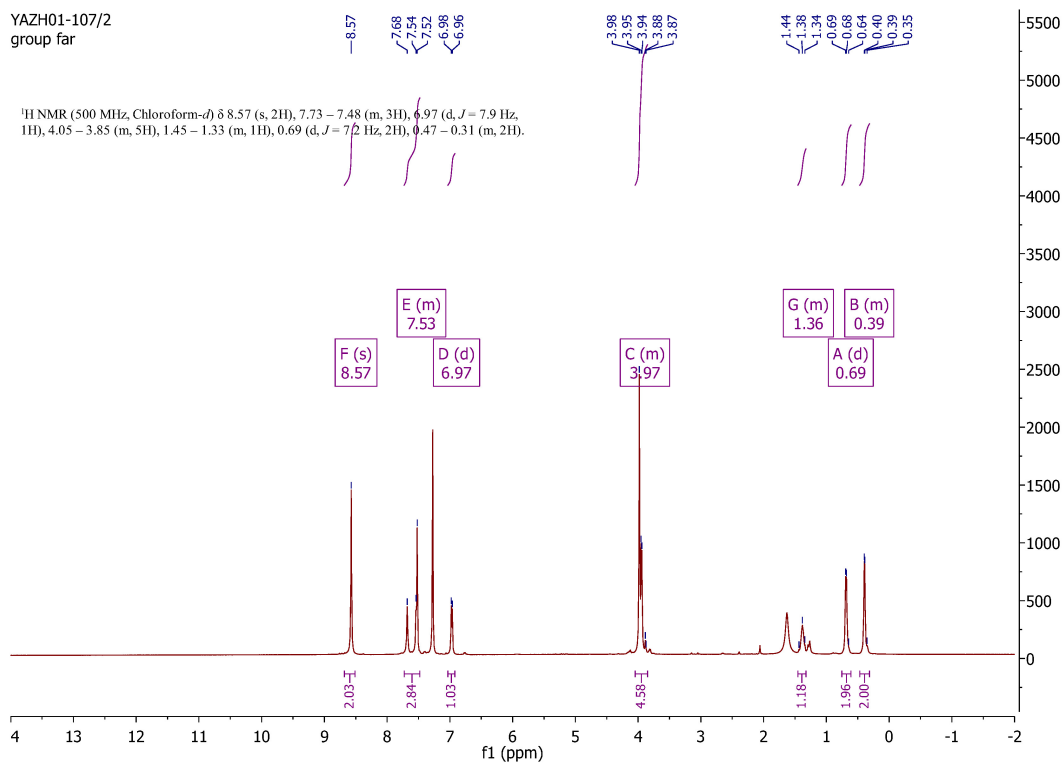

Figure S196 <sup>1</sup>H NMR spectrum of compound NPD-3094

YAZH01-107/3  
group far

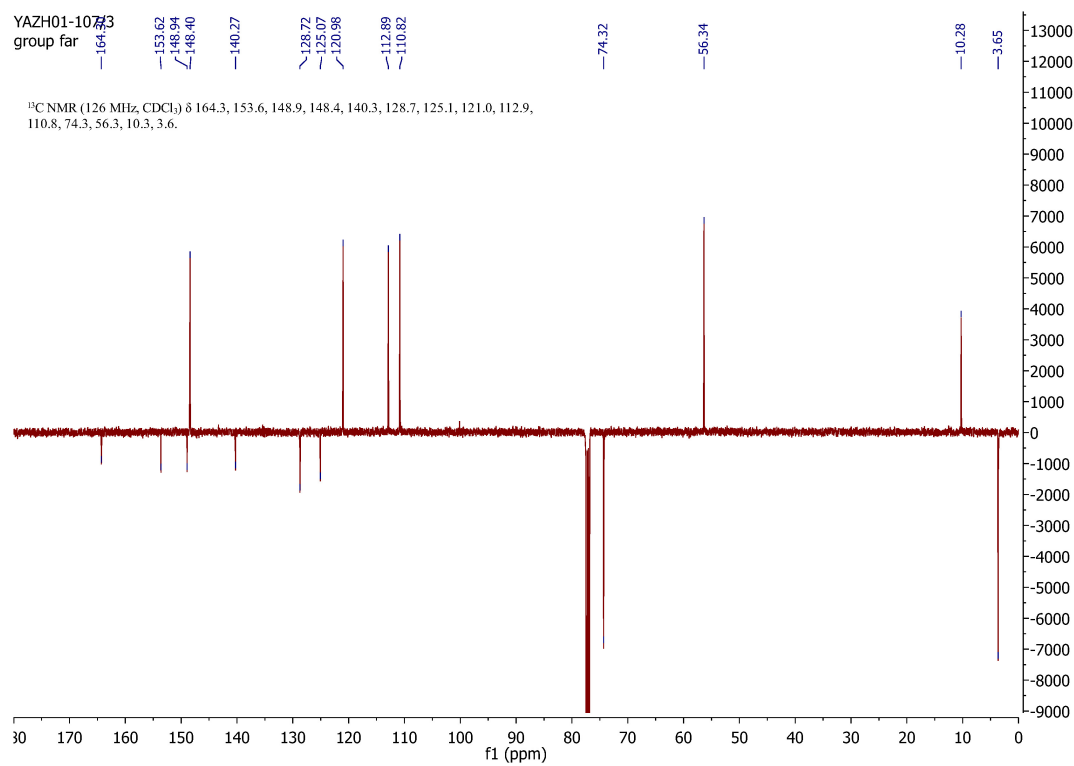

Figure S197 <sup>13</sup>C NMR spectrum of compound NPD-3094

Acquired by : Admin  
 Date Acquired : 6/13/2017 4:46:24 PM  
 Sample Name : YAZH01-110  
 Sample ID :  
 Tray# : 1  
 Vial# : 37  
 Injection Volume : 1  
 Data File : C:\LabSolutions\Data\2017\2017-wk24\YAZH01-110.lcd  
 Background File : blanco 130617.lcd  
 Method File : Method SCAN ACID standard.lcm  
 Report Format : DefaultLCMS.lcr  
 Tuning File : C:\LabSolutions\Tuning\Tuning-ESI-pos-neg01072015a.lct  
 Processed by : Admin  
 Modified Date : 6/14/2017 1:19:38 PM

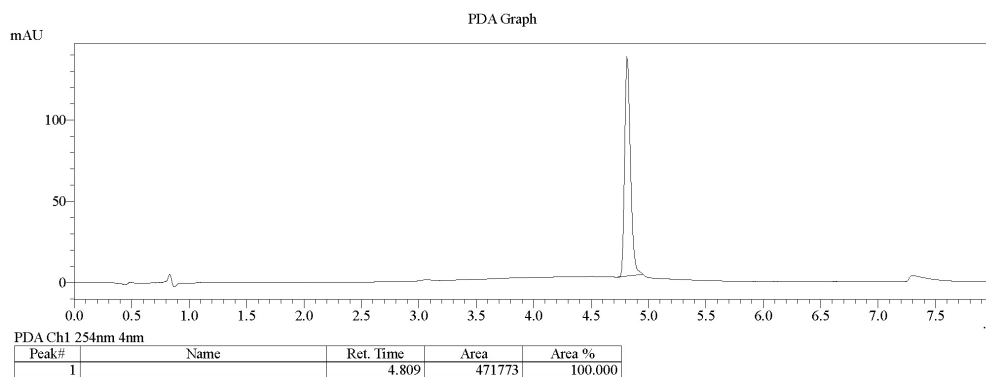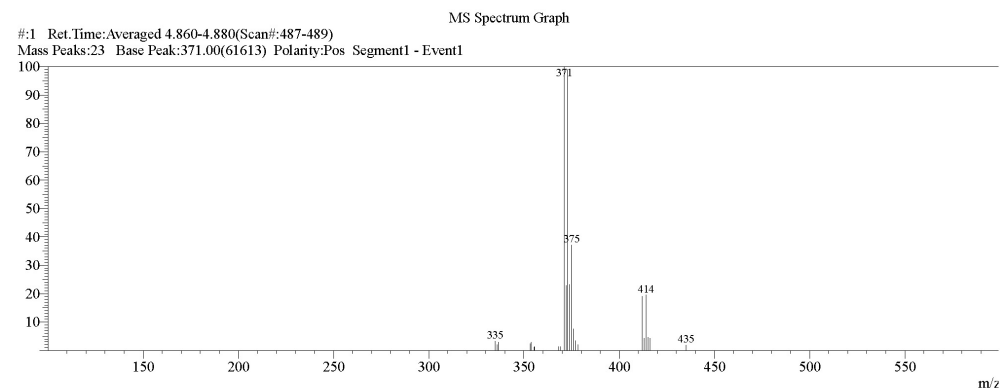

MS Spectrum Table

#1 Ret.Time:  
 BG Mode:Calc 4.770<->5.050(478<->506)  
 Mass Peaks:23 Base Peak:371.00(61613) Polarity:Pos Segment1 - Event1

| #  | m/z    | Abs.Inten. | Rel.Inten. | Charge | Polarity | Monoisotopic | #  | m/z    | Abs.Inten. | Rel.Inten. | Charge | Polarity | Monoisotopic |
|----|--------|------------|------------|--------|----------|--------------|----|--------|------------|------------|--------|----------|--------------|
| 1  | 334.75 | 2002       | 3.25       |        |          |              | 13 | 374.00 | 14328      | 23.25      |        |          |              |
| 2  | 335.75 | 1222       | 1.98       |        |          |              | 14 | 375.05 | 22855      | 37.09      |        |          |              |
| 3  | 336.75 | 1765       | 2.86       |        |          |              | 15 | 376.05 | 4665       | 7.57       |        |          |              |
| 4  | 353.15 | 1447       | 2.35       |        |          |              | 16 | 376.95 | 2130       | 3.46       |        |          |              |
| 5  | 353.70 | 1783       | 2.89       |        |          |              | 17 | 378.20 | 1272       | 2.06       |        |          |              |
| 6  | 355.20 | 672        | 1.09       |        |          |              | 18 | 411.95 | 11738      | 19.05      |        |          |              |
| 7  | 355.70 | 832        | 1.35       |        |          |              | 19 | 413.15 | 2627       | 4.26       |        |          |              |
| 8  | 368.15 | 815        | 1.32       |        |          |              | 20 | 413.95 | 12012      | 19.50      |        |          |              |
| 9  | 369.10 | 796        | 1.29       |        |          |              | 21 | 415.10 | 2901       | 4.71       |        |          |              |
| 10 | 371.00 | 61613      | 100.00     |        |          |              | 22 | 416.05 | 2677       | 4.34       |        |          |              |
| 11 | 372.05 | 14081      | 22.85      |        |          |              | 23 | 435.00 | 1176       | 1.91       |        |          |              |
| 12 | 373.00 | 61021      | 99.04      |        |          |              |    |        |            |            |        |          |              |

**Figure S198 LCMS spectrum of compound NPD-3096**

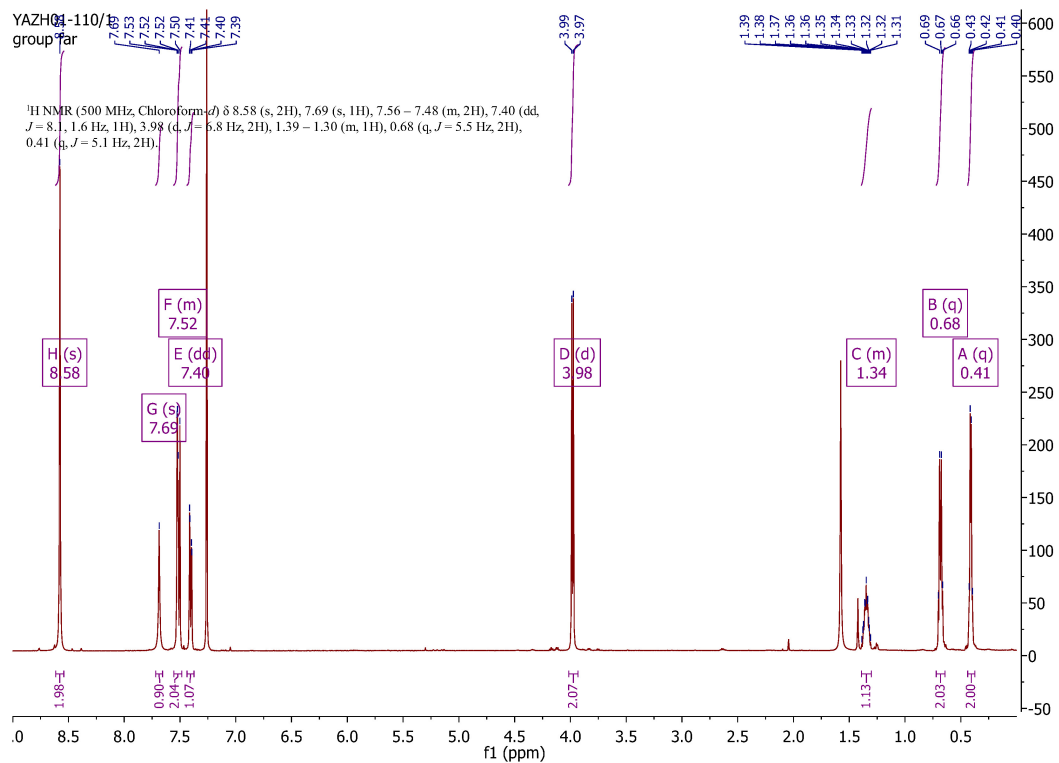

Figure S199 <sup>1</sup>H NMR spectrum of compound NPD-3096

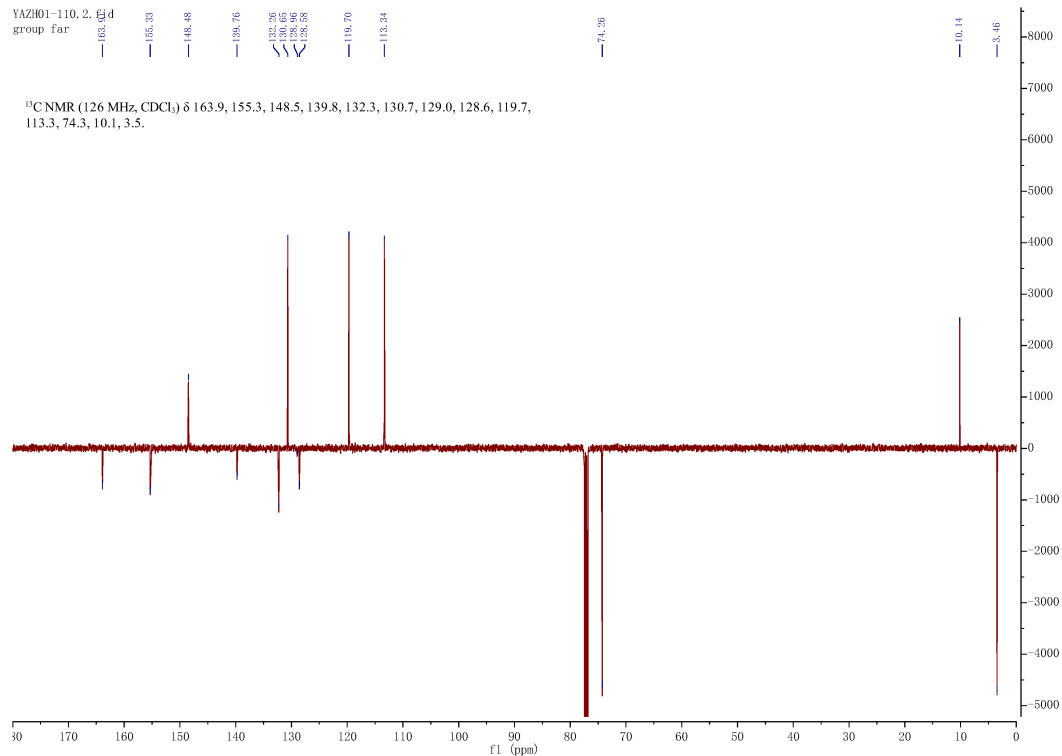

Figure S200 <sup>13</sup>C NMR spectrum of compound NPD-3096

Acquired by : Admin  
 Date Acquired : 19/2/2018 2:18:26 PM  
 Sample Name : PC-149  
 Sample ID :  
 Tray# : 1  
 Vial# : 35  
 Injection Volume : 1  
 Data File : C:\LabSolutions\Data\2018\2018-wk08\PC-149.lcd  
 Background File : blanco 19022018.lcd  
 Method File : Method SCAN ACID standard.lcm  
 Report Format : DefaultLCMS.lcr  
 Tuning File : C:\LabSolutions\Tuning\Tuning-ESI-pos-neg01072015a.lct  
 Processed by : Admin  
 Modified Date : 19/2/2018 2:44:57 PM

Medicinal Chemistry  
 Vrije Universiteit Amsterdam

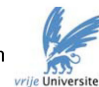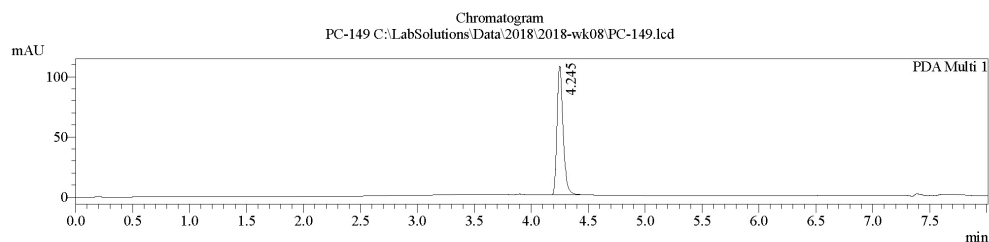

PDA Ch1 254nm 4nm

| Peak# | Name | Ret. Time | Area   | Area %  |
|-------|------|-----------|--------|---------|
| 1     |      | 4.245     | 396497 | 100.000 |

PeakTable

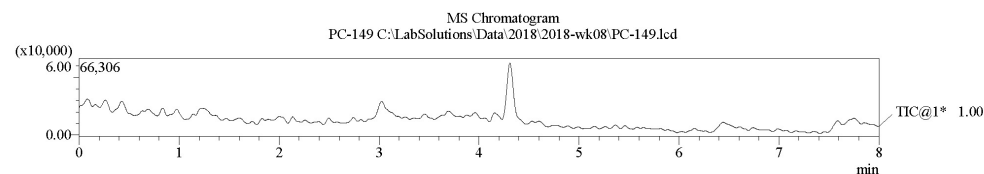

#1 Ret.Time:Single 4.310(Scan#:432)

Mass Peaks:10 Base Peak:291.95(35707) Polarity:Pos Segment1 - Event1

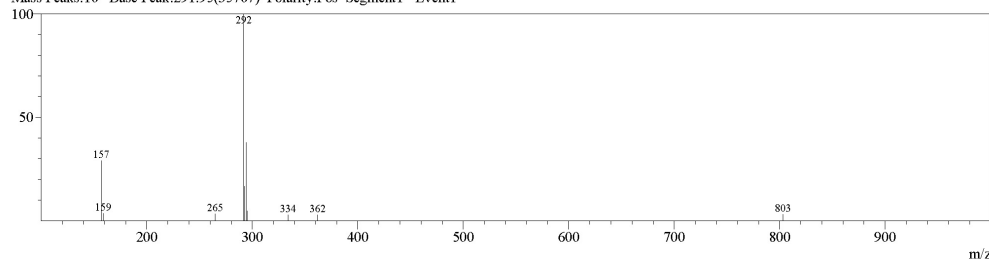

MS Spectrum Table

#1 Ret.Time:  
 BG Mode:None

Mass Peaks:10 Base Peak:291.95(35707) Polarity:Pos Segment1 - Event1

| # | m/z    | Abs.Inten. | Rel.Inten. | Charge | Polarity | Monoisotopic | #  | m/z    | Abs.Inten. | Rel.Inten. | Charge | Polarity | Monoisotopic |
|---|--------|------------|------------|--------|----------|--------------|----|--------|------------|------------|--------|----------|--------------|
| 1 | 157.05 | 10374      | 29.05      |        |          |              | 6  | 294.00 | 13482      | 37.76      |        |          |              |
| 2 | 158.95 | 1299       | 3.64       |        |          |              | 7  | 295.15 | 1720       | 4.82       |        |          |              |
| 3 | 264.80 | 1209       | 3.39       |        |          |              | 8  | 334.10 | 1065       | 2.98       |        |          |              |
| 4 | 291.95 | 35707      | 100.00     |        |          |              | 9  | 362.05 | 1037       | 2.90       |        |          |              |
| 5 | 293.00 | 5925       | 16.59      |        |          |              | 10 | 803.25 | 1159       | 3.25       |        |          |              |

Figure S201 LCMS spectrum of compound NPD-3286

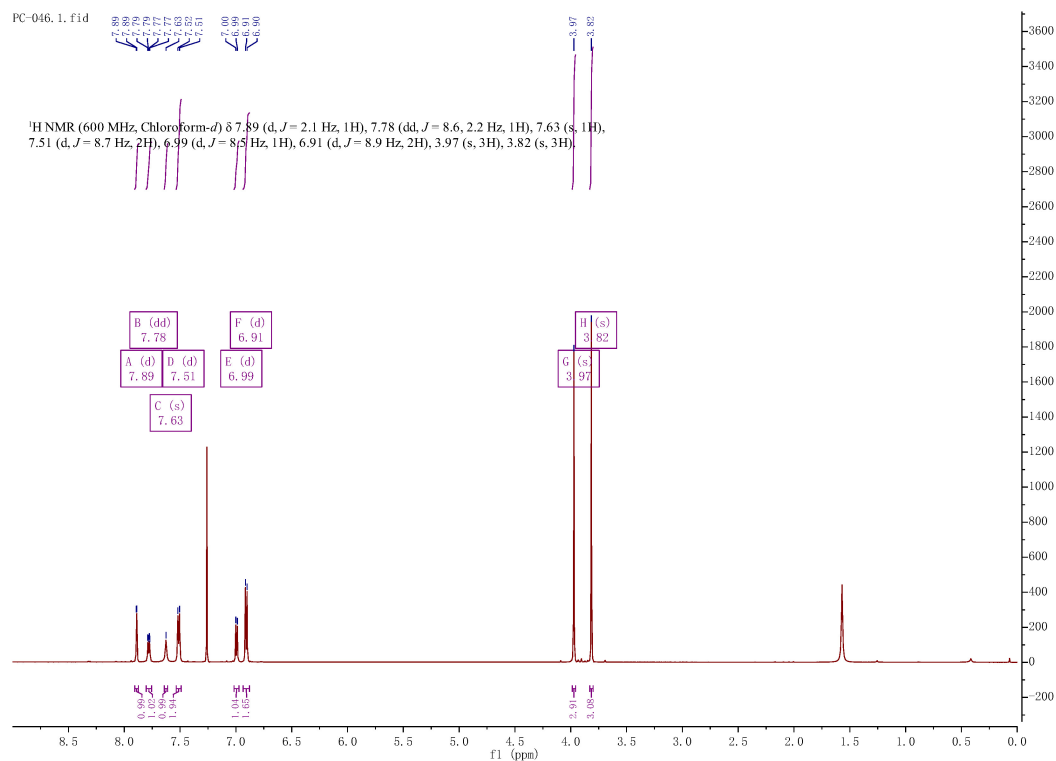

Figure S202  $^1\text{H}$  NMR spectrum of compound NPD-3286

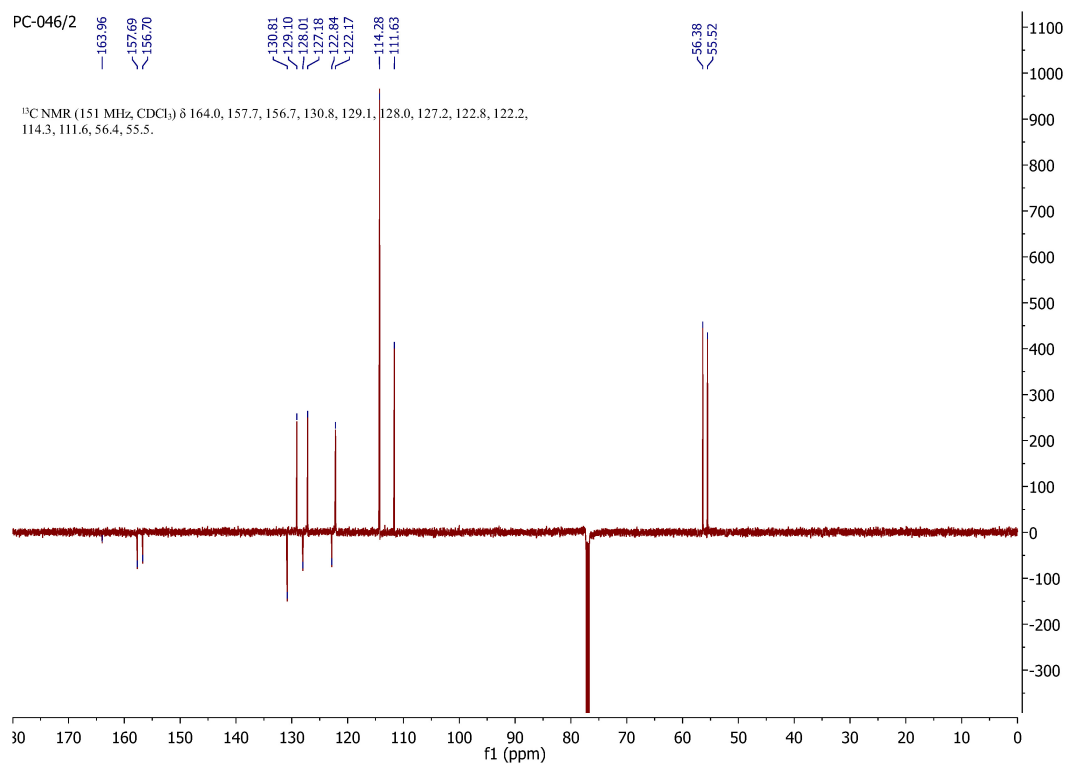

Figure S203  $^{13}\text{C}$  NMR spectrum of compound NPD-3286



Acquired by : Admin  
 Date Acquired : 19/2/2018 2:37:55 PM  
 Sample Name : PC-150  
 Sample ID :  
 Tray# : 1  
 Vial# : 36  
 Injection Volume : 1  
 Data File : C:\LabSolutions\Data\2018\2018-wk08\PC-150.lcd  
 Background File : blanco 19022018.lcd  
 Method File : Method SCAN ACID standard.lcm  
 Report Format : Default1.CMS.lcr  
 Tuning File : C:\LabSolutions\Tuning\Tuning-ESI-pos-neg01072015a.lct  
 Processed by : Admin  
 Modified Date : 1/3/2018 12:46:12 PM

Medicinal Chemistry  
 Vrije Universiteit Amsterdam

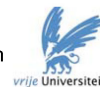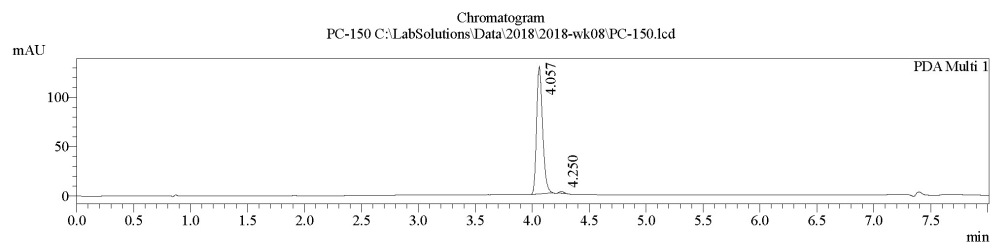

PeakTable

| Peak# | Name | Ret. Time | Area   | Area % |
|-------|------|-----------|--------|--------|
| 1     |      | 4.057     | 468487 | 99.018 |
| 2     |      | 4.250     | 4647   | 0.982  |

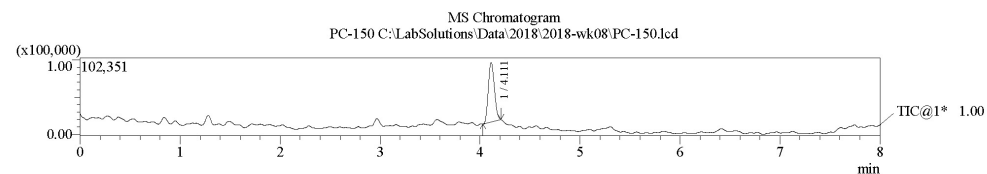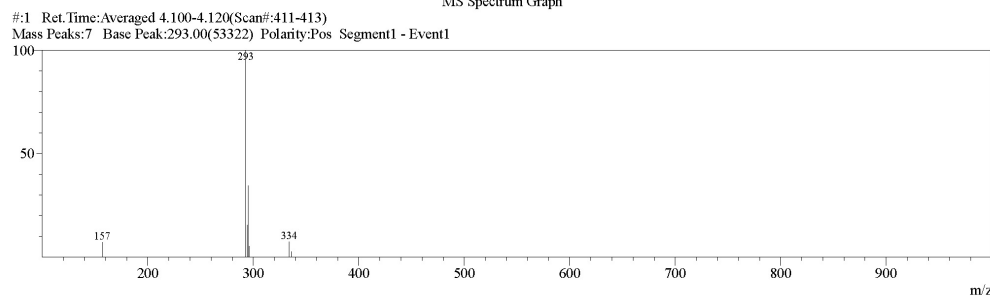

MS Spectrum Table

| # | m/z    | Abs.Inten. | Rel.Inten. | Charge | Polarity | Monoisotopic |
|---|--------|------------|------------|--------|----------|--------------|
| 1 | 157.00 | 3767       | 7.06       |        |          |              |
| 2 | 293.00 | 53322      | 100.00     |        |          |              |
| 3 | 294.05 | 8219       | 15.41      |        |          |              |
| 4 | 295.00 | 18471      | 34.64      |        |          |              |
| 5 | 296.10 | 2842       | 5.33       |        |          |              |
| 6 | 333.90 | 3900       | 7.31       |        |          |              |
| 7 | 336.10 | 1452       | 2.72       |        |          |              |

Figure S204 LCMS spectrum of compound NPD-3287

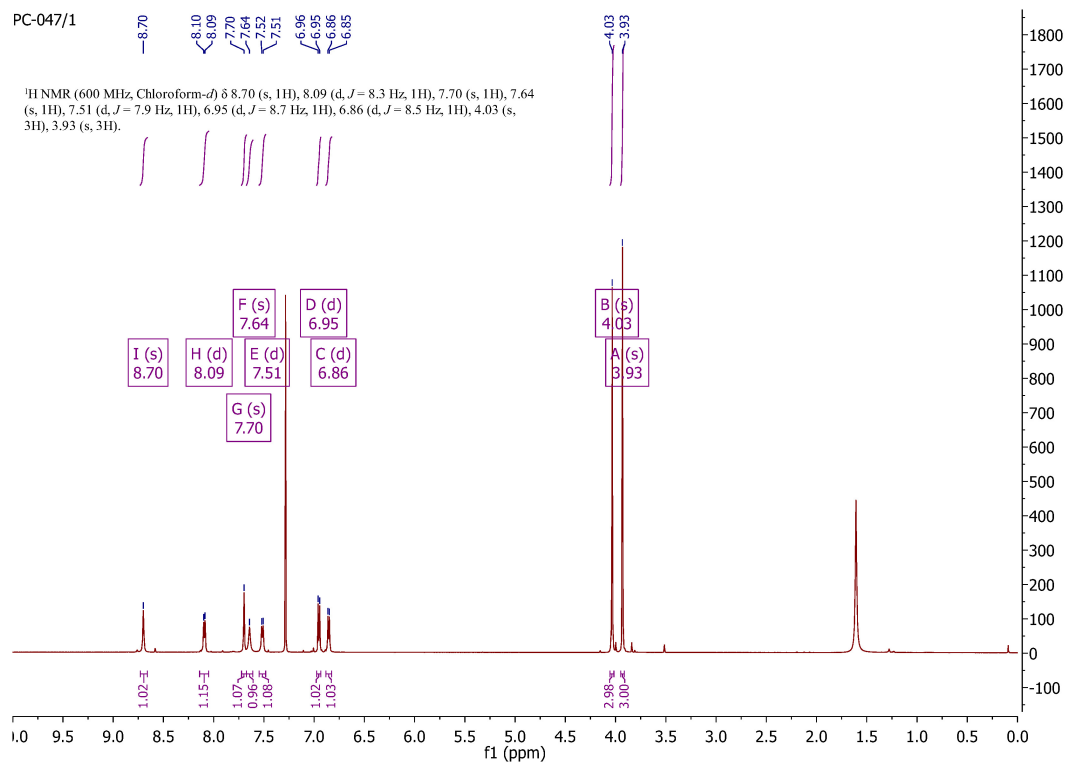

Figure S205  $^1\text{H}$  NMR spectrum of compound NPD-3287

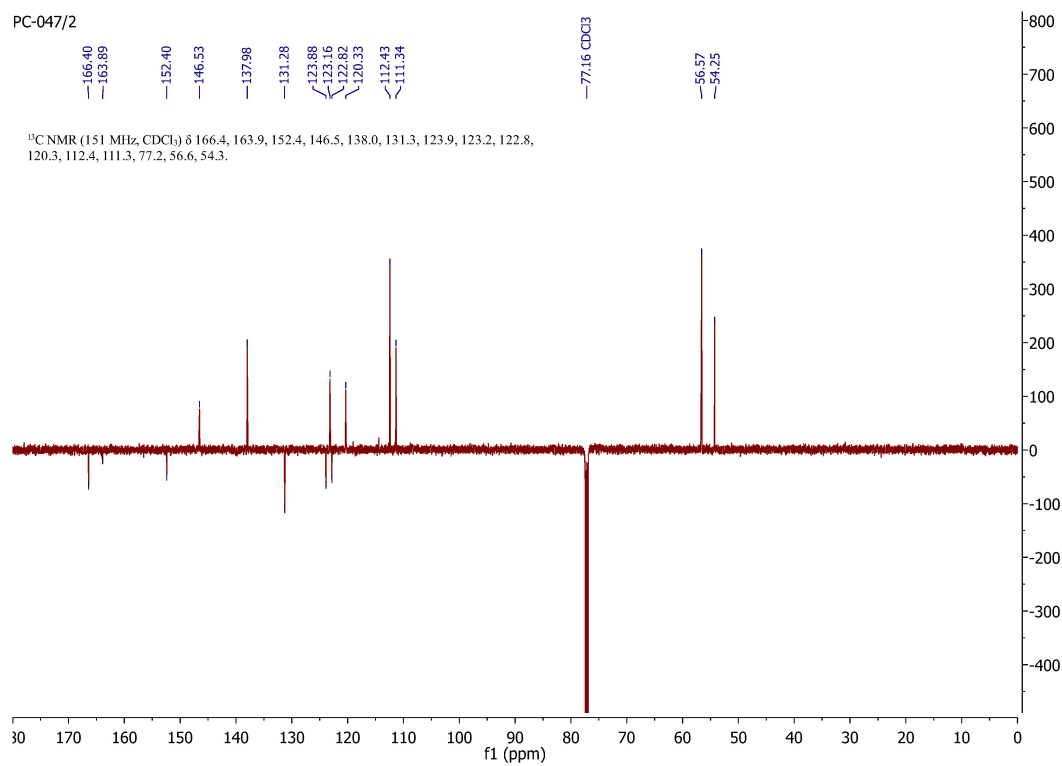

Figure S206  $^{13}\text{C}$  NMR spectrum of compound NPD-3287

Acquired by : Admin  
Date Acquired : 19/2/2018 2:46:34 PM  
Sample Name : PC-151  
Sample ID :  
Tray# : 1  
Vial# : 37  
Injection Volume : 1  
Data File : C:\LabSolutions\Data\2018\2018-wk08\PC-151.lcd  
Background File : blanco 19022018.lcd  
Method File : Method SCAN ACID standard.lcm  
Report Format : DefaultLCMS.rpt  
Tuning File : C:\LabSolutions\Tuning\Tuning-ESI-pos-neg01072015a.lct  
Processed by : Admin  
Modified Date : 19/2/2018 5:31:36 PM

Medicinal Chemistry  
Vrije Universiteit Amsterdam

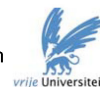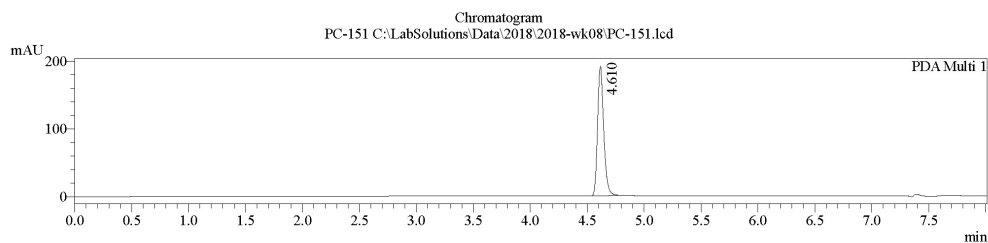

PeakTable

| Peak# | Name | Ret. Time | Area   | Area %  |
|-------|------|-----------|--------|---------|
| 1     |      | 4.610     | 714742 | 100.000 |

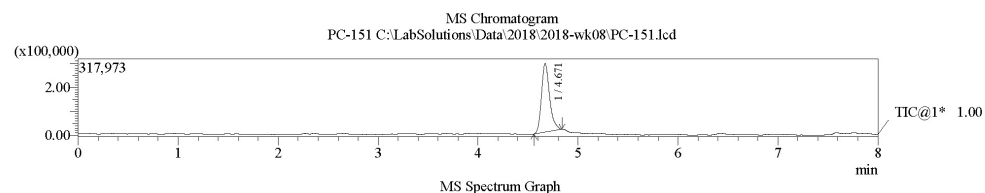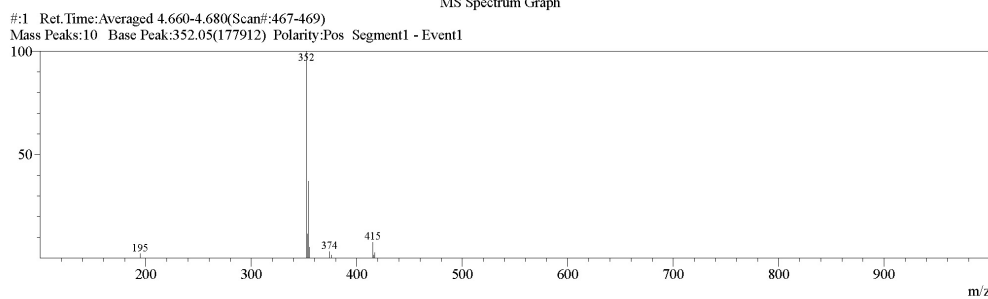

MS Spectrum Table

| #  | m/z    | Abs.Inten. | Rel.Inten. | Charge | Polarity | Monoisotopic |
|----|--------|------------|------------|--------|----------|--------------|
| 1  | 194.95 | 3762       | 2.11       |        |          |              |
| 2  | 352.05 | 177912     | 100.00     |        |          |              |
| 3  | 353.10 | 20562      | 11.56      |        |          |              |
| 4  | 354.05 | 65945      | 37.07      |        |          |              |
| 5  | 355.00 | 9550       | 5.37       |        |          |              |
| 6  | 374.00 | 5700       | 3.20       |        |          |              |
| 7  | 376.00 | 2427       | 1.36       |        |          |              |
| 8  | 415.15 | 13568      | 7.63       |        |          |              |
| 9  | 416.15 | 2698       | 1.52       |        |          |              |
| 10 | 417.05 | 4652       | 2.61       |        |          |              |

Figure S207 LCMS spectrum of compound NPD-3288

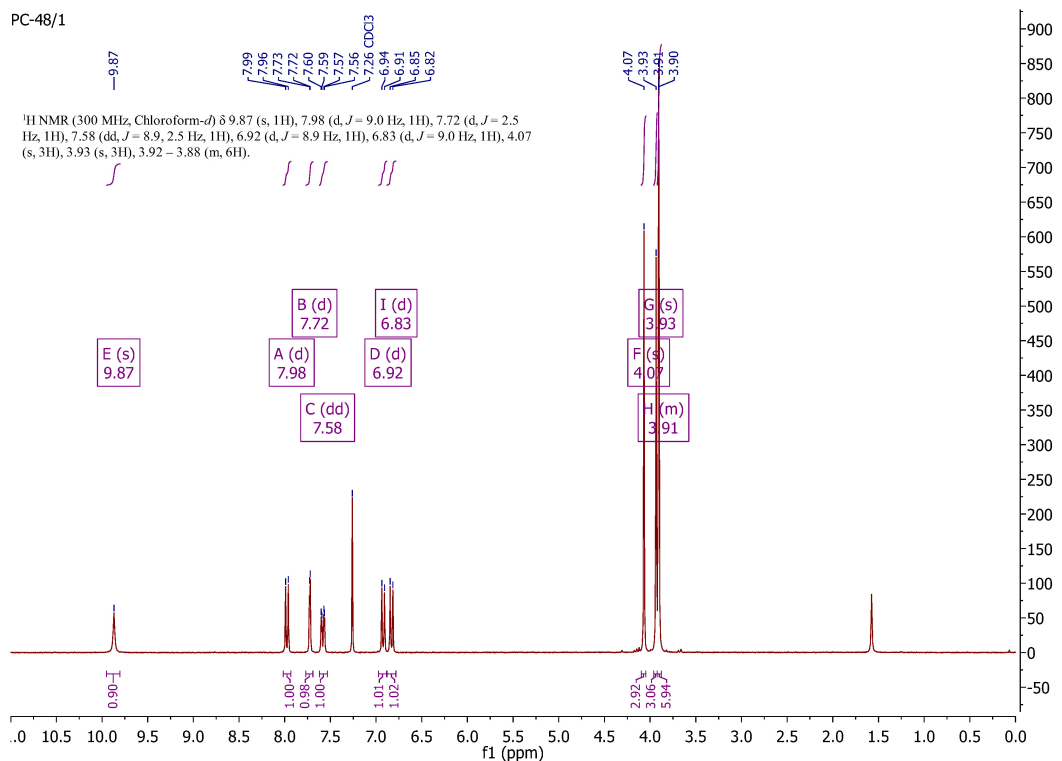

Figure S208  $^1\text{H}$  NMR spectrum of compound NPD-3288

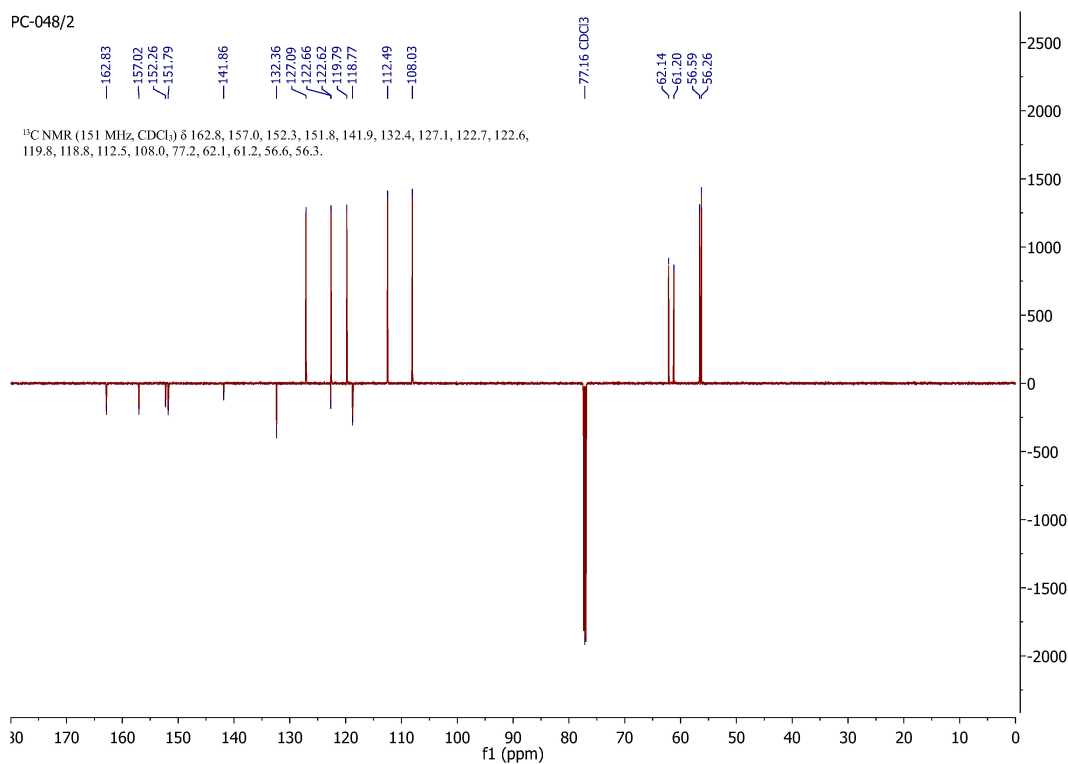

Figure S209  $^{13}\text{C}$  NMR spectrum of compound NPD-3288

Acquired by : Admin  
 Date Acquired : 26/2/2018 10:02:07 AM  
 Sample Name : PC-151-Thisjs  
 Sample ID :  
 Tray# : 1  
 Vial# : 1  
 Injection Volume : 1  
 Data File : C:\LabSolutions\Data\2018\2018-wk09\PC-151-Thisjs.lcd  
 Background File : Blanco\_26022018.lcd  
 Method File : Method\_SCAN\_ACID\_standard.lcm  
 Report Format : DefaultL.CMS.lcr  
 Tuning File : C:\LabSolutions\Tuning\Tuning-ESI-pos-neg01072015a.lct  
 Processed by : Admin  
 Modified Date : 26/2/2018 10:30:02 AM

Medicinal Chemistry  
 Vrije Universiteit Amsterdam

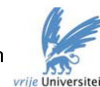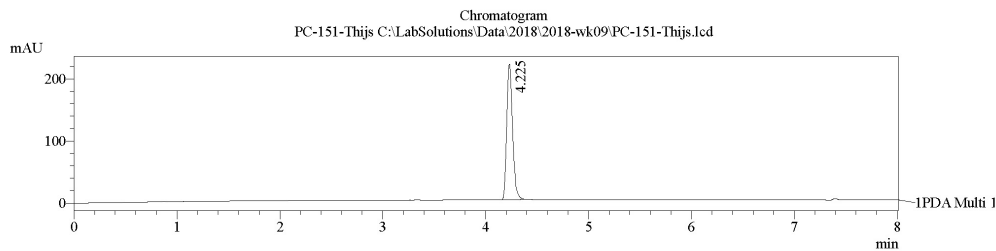

| Peak# | Name | Ret. Time | Area   | Area %  |
|-------|------|-----------|--------|---------|
| 1     |      | 4.225     | 851213 | 100.000 |

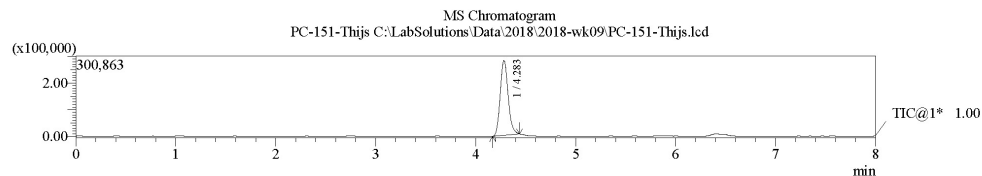

#1 Ret.Time:Averaged 4.270-4.290(Scan#:428-430)  
 Mass Peaks:6 Base Peak:352.10(192449) Polarity:Pos Segment1 - Event1

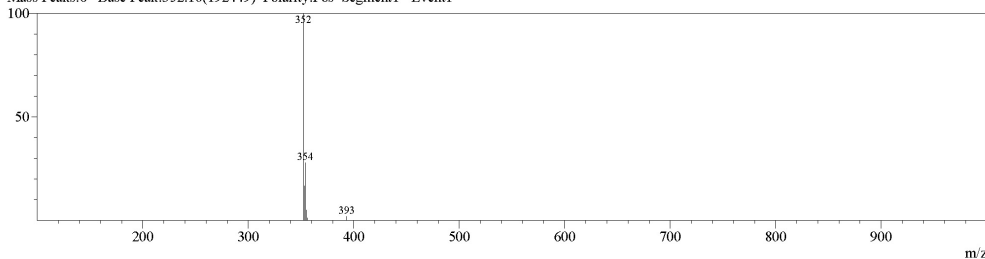

#1 Ret.Time:  
 BG Mode:Calc 4.170<->4.440(418<->445)  
 Mass Peaks:6 Base Peak:352.10(192449) Polarity:Pos Segment1 - Event1

| # | m/z    | Abs.Inten. | Rel.Inten. | Charge | Polarity | Monoisotopic |
|---|--------|------------|------------|--------|----------|--------------|
| 1 | 352.10 | 192449     | 100.00     |        |          |              |
| 2 | 353.05 | 31737      | 16.49      |        |          |              |
| 3 | 354.05 | 53672      | 27.89      |        |          |              |
| 4 | 355.10 | 9257       | 4.81       |        |          |              |
| 5 | 356.20 | 2157       | 1.12       |        |          |              |
| 6 | 393.15 | 3681       | 1.91       |        |          |              |

Figure S210 LCMS spectrum of compound NPD-3289

PC-049/1

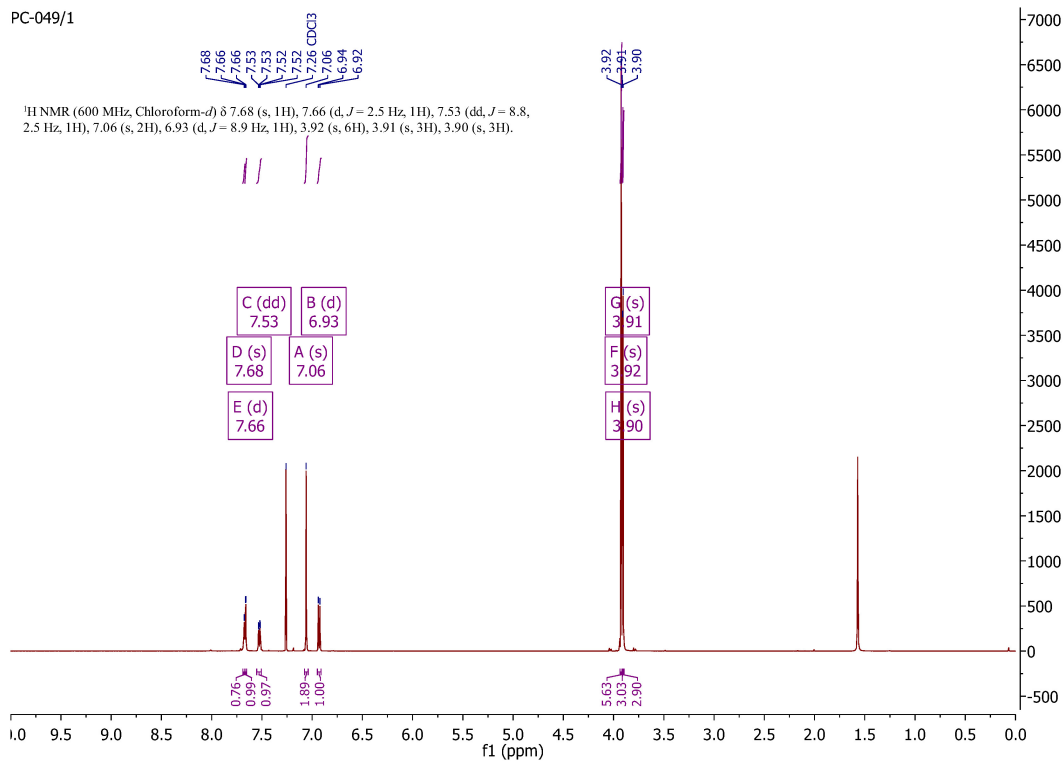Figure S211 <sup>1</sup>H NMR spectrum of compound NPD-3289

PC-049/2

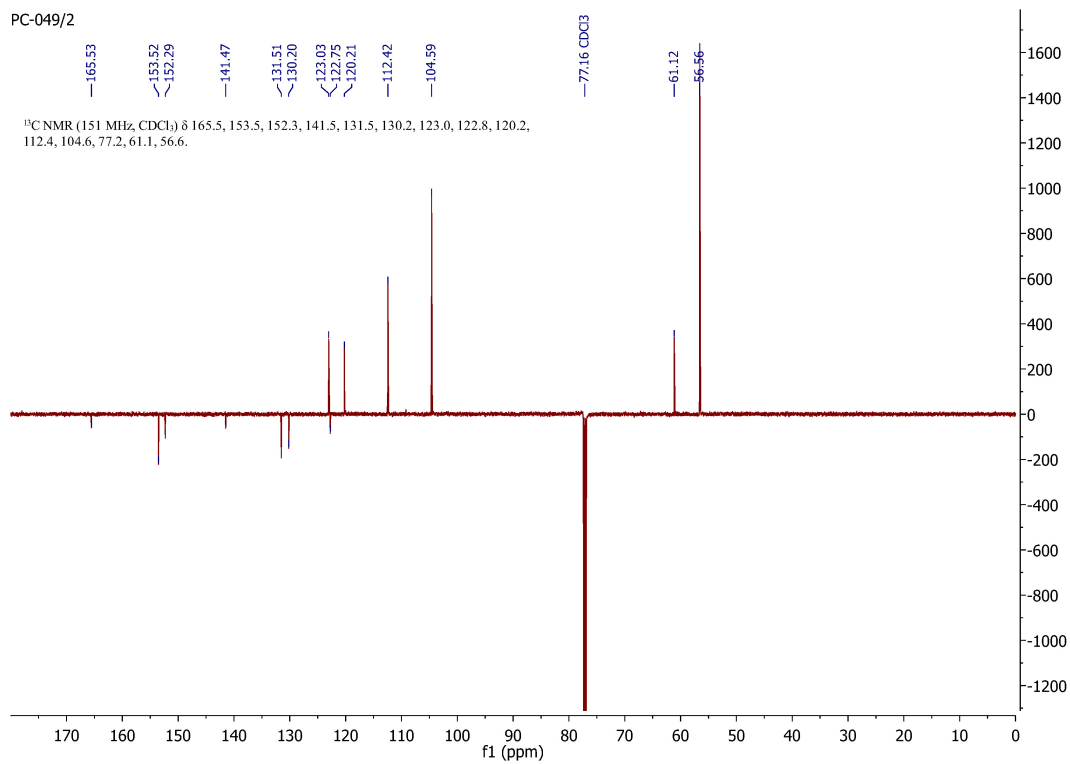Figure S212 <sup>13</sup>C NMR spectrum of compound NPD-3289

Acquired by : Admin  
 Date Acquired : 19/2/2018 3:03:46 PM  
 Sample Name : PC-152  
 Sample ID :  
 Tray# : 1  
 Vial# : 38  
 Injection Volume : 1  
 Data File : C:\LabSolutions\Data\2018-wk08\PC-152.lcd  
 Background File : blanco 19022018.lcd  
 Method File : Method SCAN ACID standard.lcm  
 Report Format : DefaultL.CMS.lcr  
 Tuning File : C:\LabSolutions\Tuning\Tuning-ESI-pos-neg01072015a.lct  
 Processed by : Admin  
 Modified Date : 19/2/2018 5:33:09 PM

Medicinal Chemistry  
 Vrije Universiteit Amsterdam

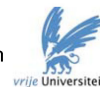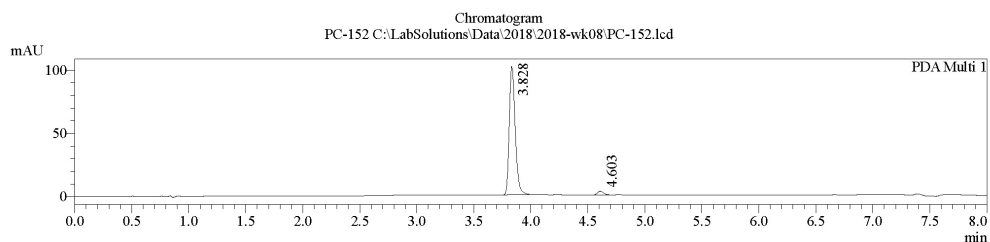

PeakTable

| Peak# | Name | Ret. Time | Area   | Area % |
|-------|------|-----------|--------|--------|
| 1     |      | 3.828     | 365000 | 97.265 |
| 2     |      | 4.603     | 10263  | 2.735  |

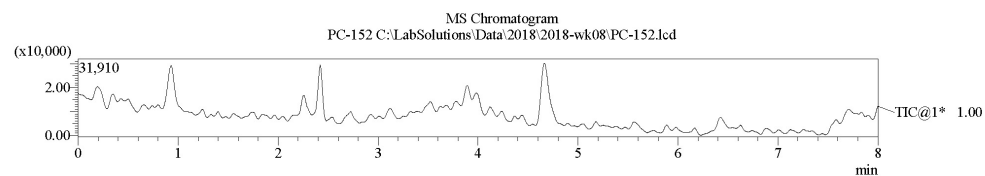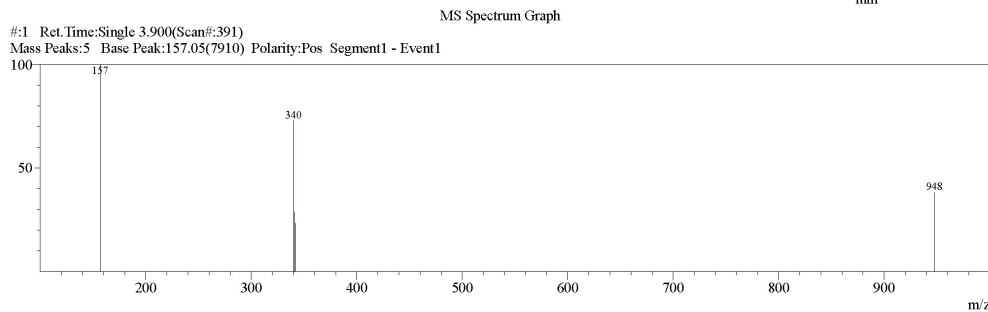

MS Spectrum Table

| # | m/z    | Abs.Inten. | Rel.Inten. | Charge | Polarity | Monoisotopic |
|---|--------|------------|------------|--------|----------|--------------|
| 1 | 157.05 | 7910       | 100.00     |        |          |              |
| 2 | 339.90 | 5759       | 72.81      |        |          |              |
| 3 | 340.80 | 2284       | 28.87      |        |          |              |
| 4 | 341.80 | 1854       | 23.44      |        |          |              |
| 5 | 947.70 | 3011       | 38.07      |        |          |              |

Figure S213 LCMS spectrum of compound NPD-3290

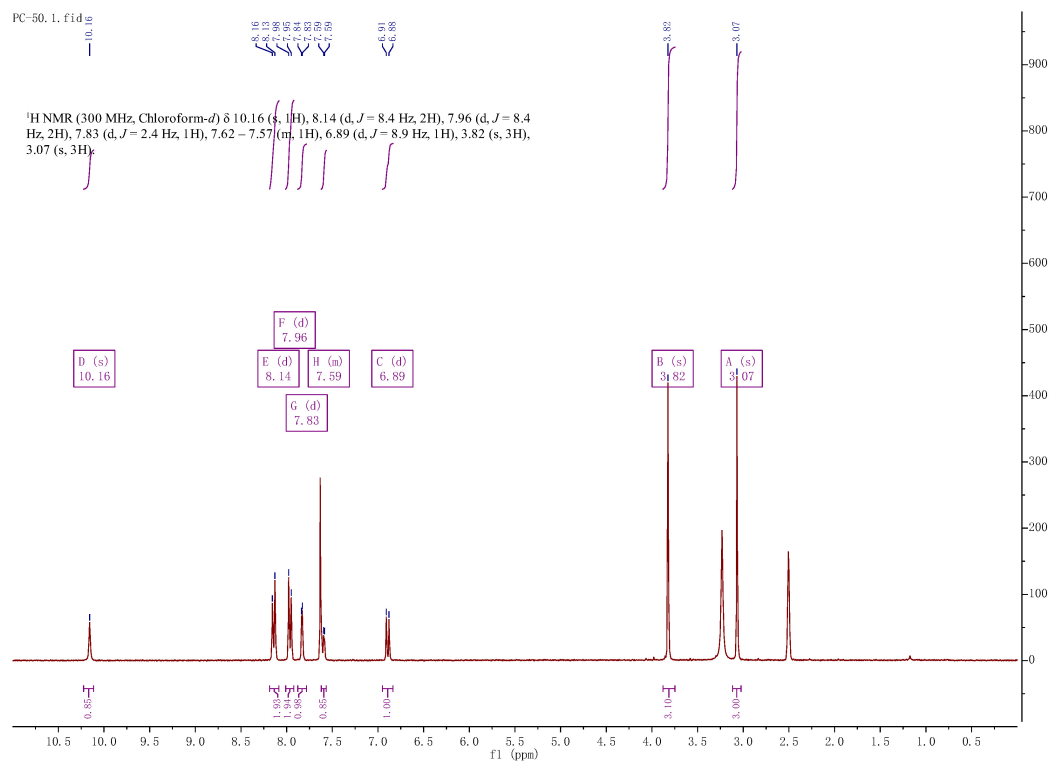

Figure S214  $^1\text{H}$  NMR spectrum of compound NPD-3290

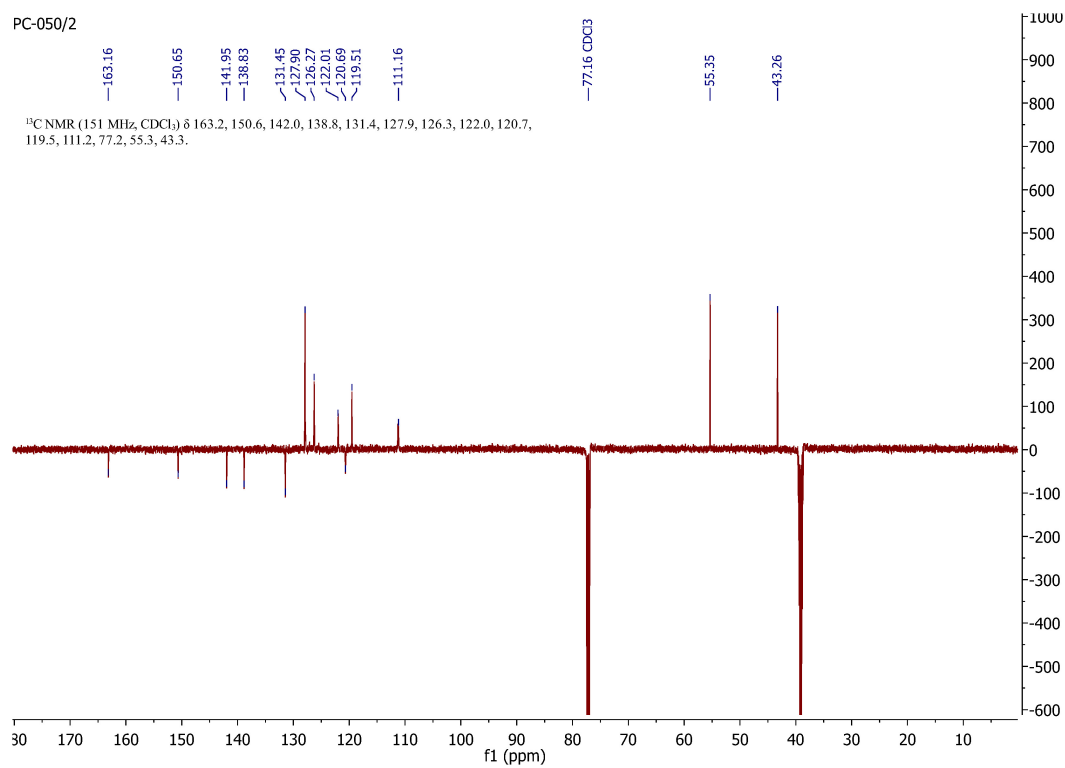

Figure S215  $^{13}\text{C}$  NMR spectrum of compound NPD-3290



Acquired by : Admin  
Date Acquired : 23/2/2018 10:51:09 AM  
Sample Name : PC-155-1  
Sample ID :  
Tray# : 1  
Vial# : 6  
Injection Volume : 3  
Data File : C:\LabSolutions\Data\2018\2018-wk08\PC-155-1.lcd  
Background File : Blanco\_23022018.lcd  
Method File : Method\_SCAN.ACID.standard.lcm  
Report Format : DefaultL.CMS.lcr  
Tuning File : C:\LabSolutions\Tuning\Tuning-ESI-pos-neg01072015a.lct  
Processed by : Admin  
Modified Date : 23/2/2018 12:26:57 PM

Medicinal Chemistry  
Vrije Universiteit Amsterdam

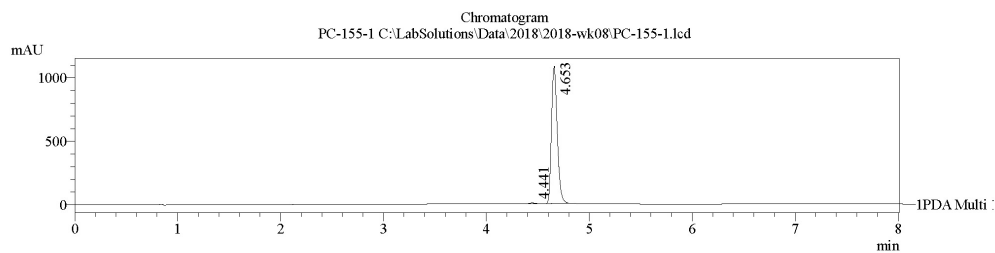

| Peak# | Name | Ret. Time | Area    | Area % |
|-------|------|-----------|---------|--------|
| 1     |      | 4.441     | 26653   | 0.633  |
| 2     |      | 4.653     | 4183901 | 99.367 |

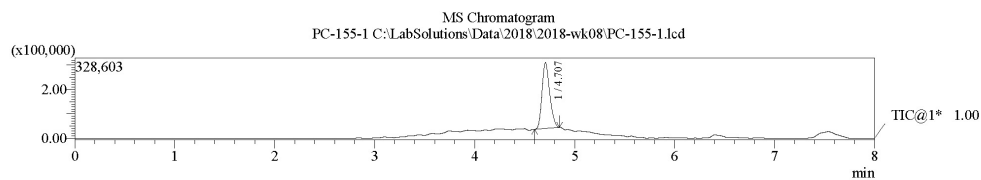

#1 Ret.Time:Averaged 4.700-4.720(Scan#:471-473)  
Mass Peaks:5 Base Peak:292.00(187969) Polarity:Pos Segment1 - Event1

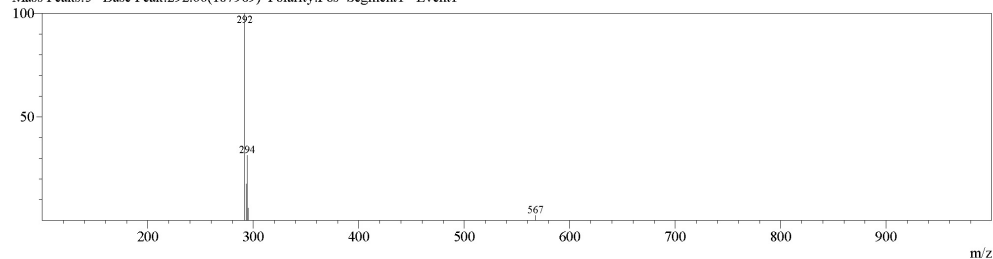

MS Spectrum Table

| # | m/z    | Abs.Inten. | Rel.Inten. | Charge | Polarity | Monoisotopic |
|---|--------|------------|------------|--------|----------|--------------|
| 1 | 292.00 | 187969     | 100.00     |        |          |              |
| 2 | 293.05 | 32956      | 17.53      |        |          |              |
| 3 | 294.05 | 58856      | 31.31      |        |          |              |
| 4 | 294.95 | 10936      | 5.82       |        |          |              |
| 5 | 567.45 | 4178       | 2.22       |        |          |              |

Figure S216 LCMS spectrum of compound NPD-3291

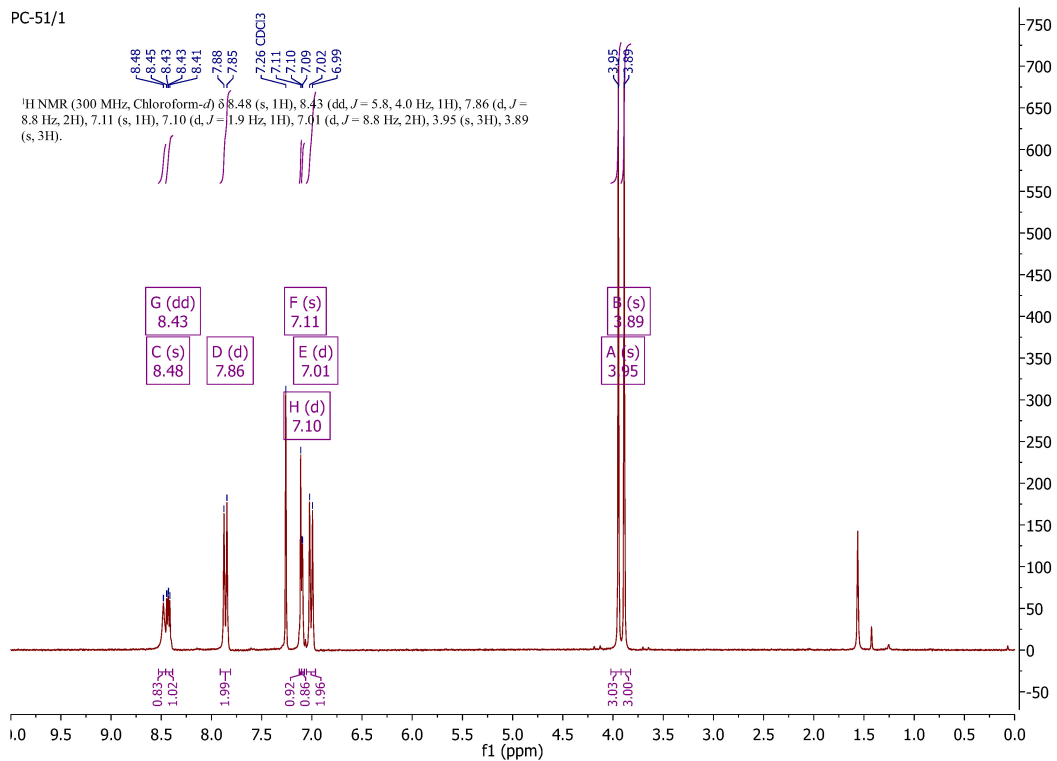

Figure S217  $^1\text{H}$  NMR spectrum of compound NPD-3291

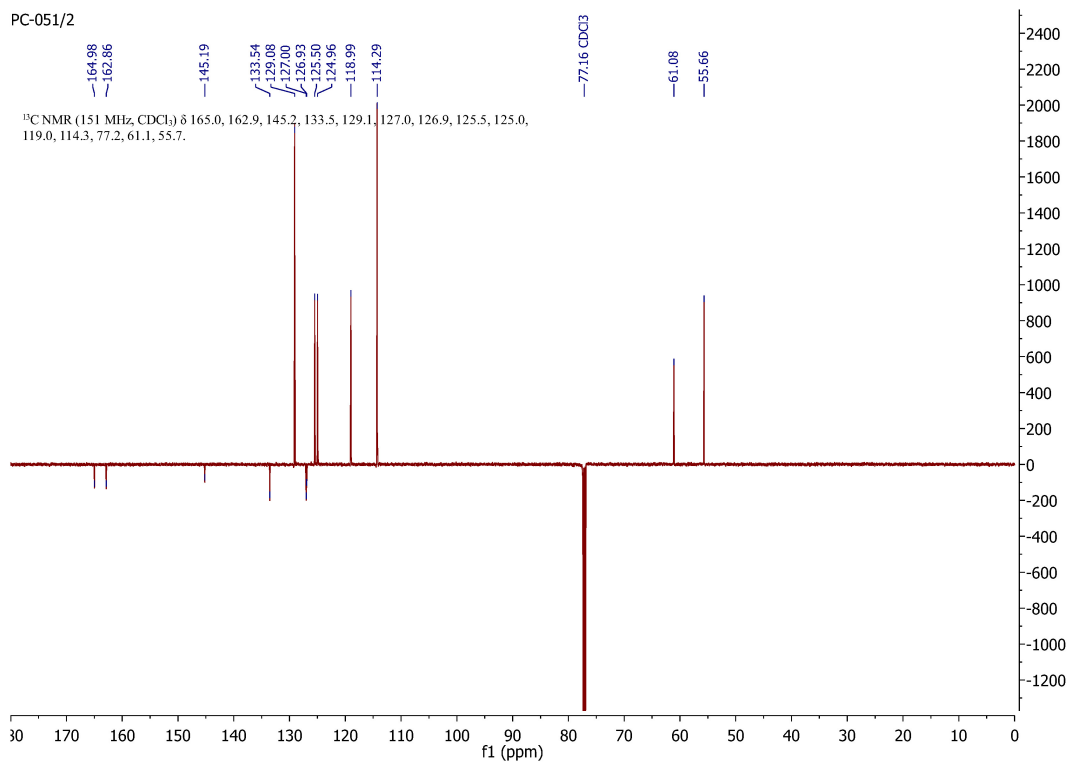

Figure S218  $^{13}\text{C}$  NMR spectrum of compound NPD-3291

Acquired by : Admin  
 Date Acquired : 19/2/2018 3:12:52 PM  
 Sample Name : PC-156  
 Sample ID :  
 Tray# : 1  
 Vial# : 39  
 Injection Volume : 1  
 Data File : C:\LabSolutions\Data\2018\2018-wk08\PC-156.lcd  
 Background File : blanco 19022018.lcd  
 Method File : Method SCAN ACID standard.lcm  
 Report Format : DefaultL.CMS.lcr  
 Tuning File : C:\LabSolutions\Tuning\Tuning-ESI-pos-neg01072015a.lct  
 Processed by : Admin  
 Modified Date : 19/2/2018 5:34:20 PM

Medicinal Chemistry  
 Vrije Universiteit Amsterdam

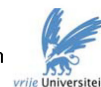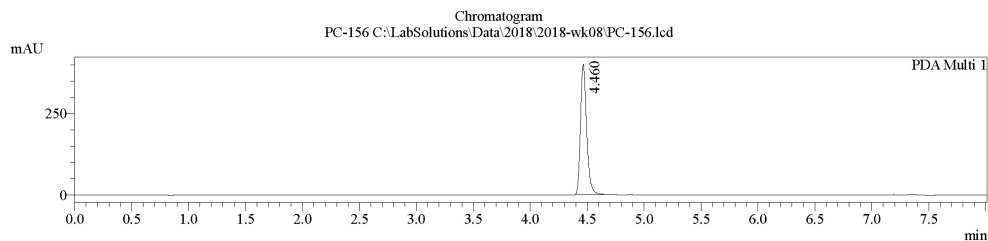

Peak Table

| Peak# | Name | Ret. Time | Area    | Area %  |
|-------|------|-----------|---------|---------|
| 1     |      | 4.460     | 1487845 | 100.000 |

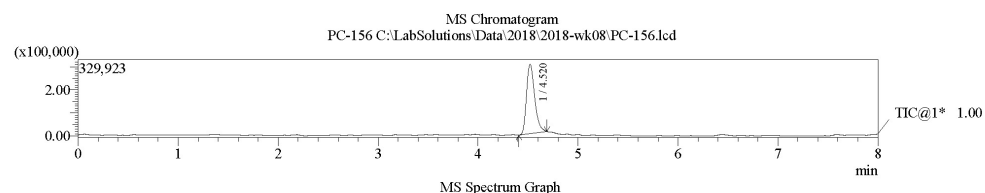

MS Spectrum Graph

#1 Ret.Time:Averaged 4.510-4.530(Scan#:452-454)

Mass Peaks:7 Base Peak:322.05(186972) Polarity:Pos Segment1 - Event1

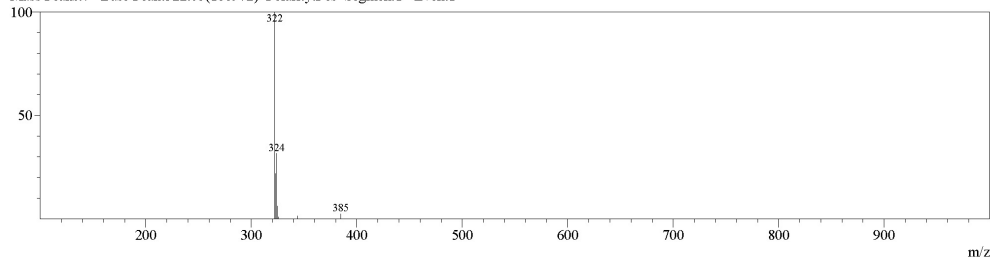

MS Spectrum Table

#1 Ret.Time:

BG Mode:Calc 4.410<->4.690(442<->470)

Mass Peaks:7 Base Peak:322.05(186972) Polarity:Pos Segment1 - Event1

| # | m/z    | Abs.Inten. | Rel.Inten. | Charge | Polarity | Monoisotopic | # | m/z    | Abs.Inten. | Rel.Inten. | Charge | Polarity | Monoisotopic |
|---|--------|------------|------------|--------|----------|--------------|---|--------|------------|------------|--------|----------|--------------|
| 1 | 322.05 | 186972     | 100.00     |        |          |              | 5 | 326.10 | 1909       | 1.02       |        |          |              |
| 2 | 323.10 | 40864      | 21.86      |        |          |              | 6 | 343.95 | 2512       | 1.34       |        |          |              |
| 3 | 324.05 | 59111      | 31.61      |        |          |              | 7 | 385.05 | 4520       | 2.42       |        |          |              |
| 4 | 325.05 | 11728      | 6.27       |        |          |              |   |        |            |            |        |          |              |

Figure S219 LCMS spectrum of compound NPD-3292

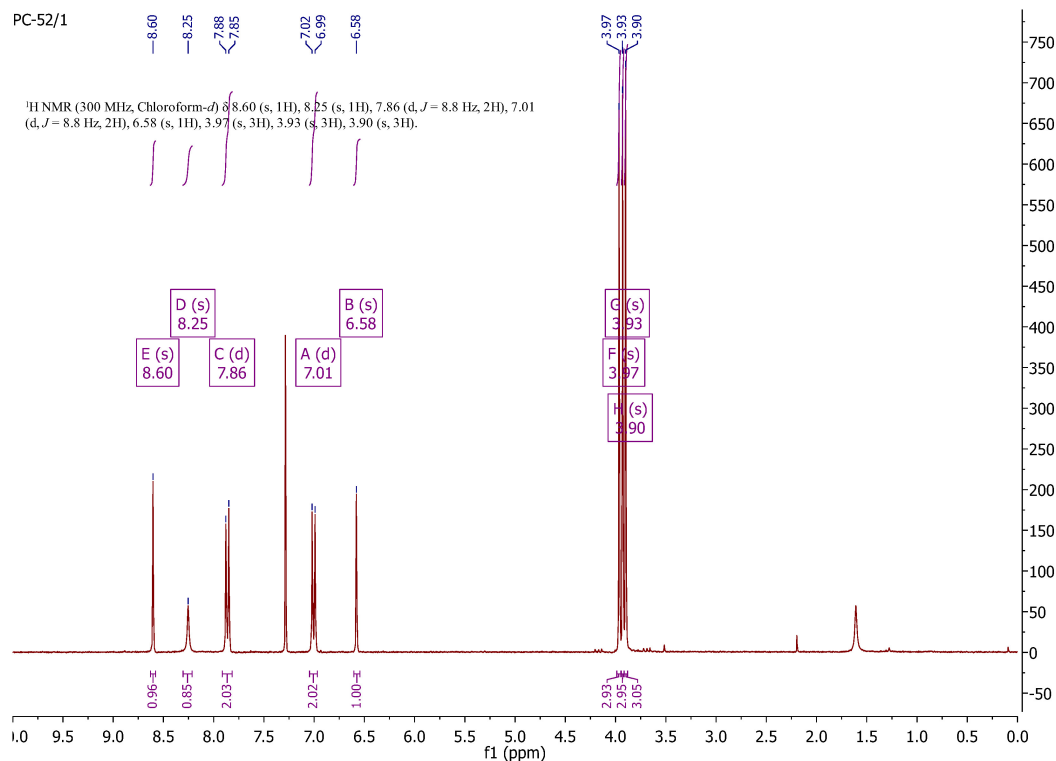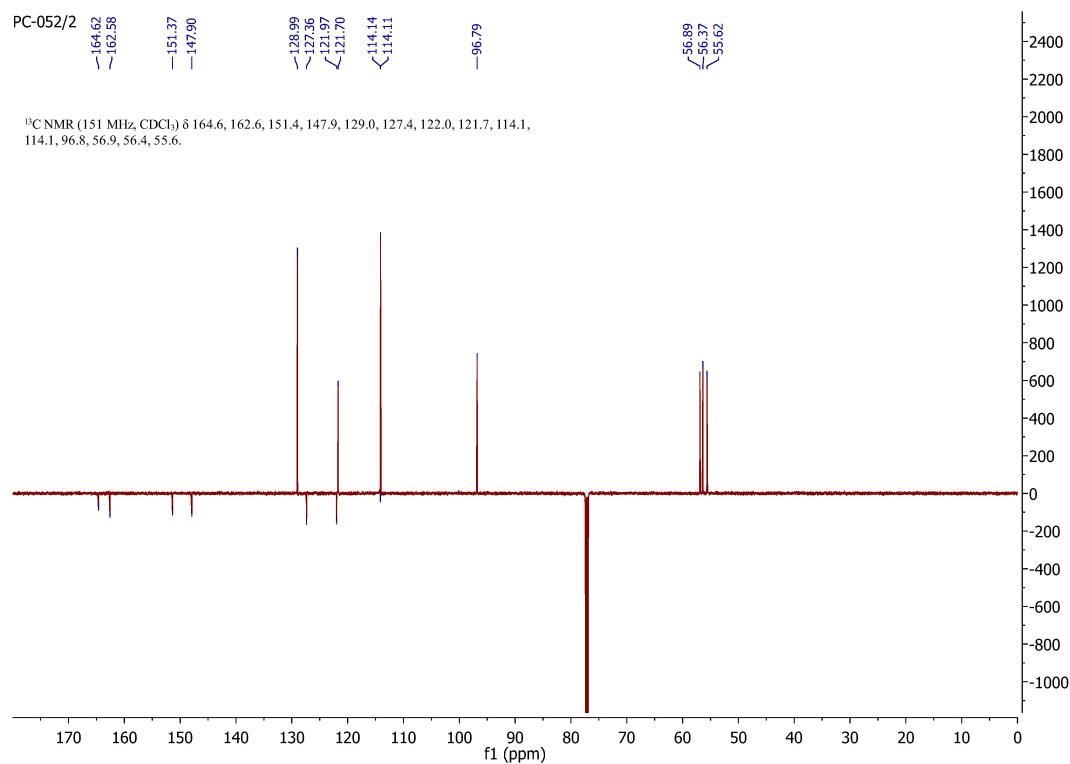

Acquired by : Admin  
Date Acquired : 26/2/2018 10:10:45 AM  
Sample Name : PC-157  
Sample ID :  
Tray# : 1  
Vial# : 2  
Injection Volume : 1  
Data File : C:\LabSolutions\Data\2018\2018-wk09\PC-157.lcd  
Background File : Blanco\_26022018.lcd  
Method File : Method SCAN ACID standard.lcm  
Report Format : DefaultLCMS.lcr  
Tuning File : C:\LabSolutions\Tuning\Tuning-ESI-pos-neg01072015a.lct  
Processed by : Admin  
Modified Date : 26/2/2018 10:30:55 AM

Medicinal Chemistry  
Vrije Universiteit Amsterdam

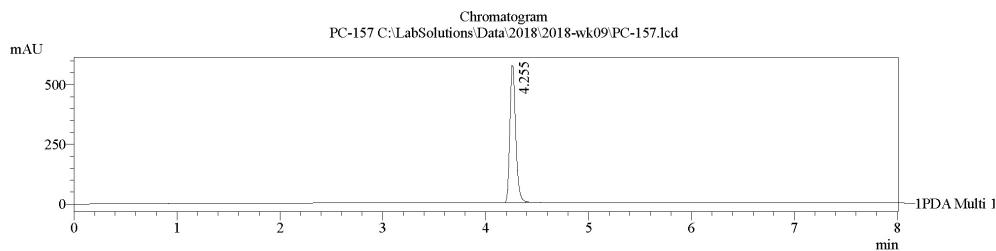

1 PDA Multi 1 / 254nm 4nm

PDA Ch1 254nm 4nm

| Peak# | Name | Ret. Time | Area    | Area %  |
|-------|------|-----------|---------|---------|
| 1     |      | 4.255     | 2260471 | 100.000 |

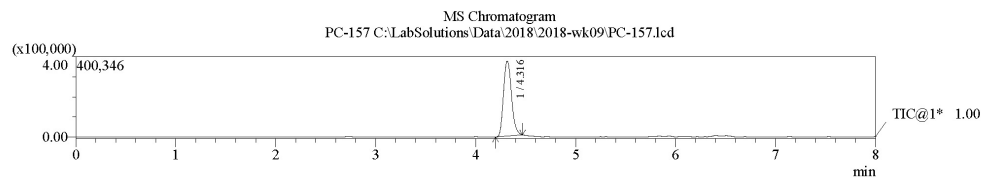

#1 Ret.Time:Averaged 4.310-4.330(Scan#:432-434)

Mass Peaks:5 Base Peak:292.05(246719) Polarity:Pos Segment1 - Event1

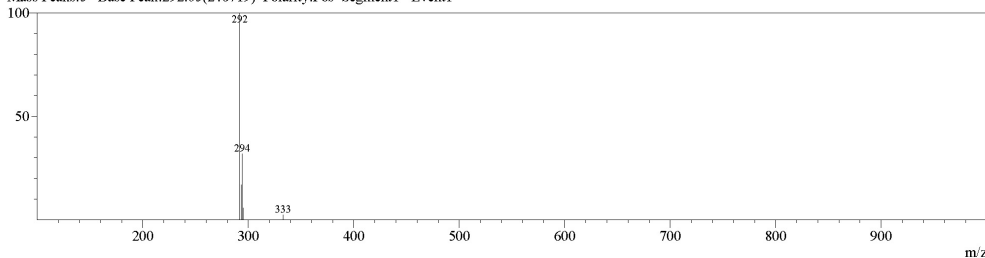

MS Spectrum Table

#1 Ret.Time:

BG Mode:Calc 4.200<=>4.470(421<=>448)

Mass Peaks:5 Base Peak:292.05(246719) Polarity:Pos Segment1 - Event1

| # | m/z    | Abs.Inten. | Rel.Inten. | Charge | Polarity | Monoisotopic | # | m/z    | Abs.Inten. | Rel.Inten. | Charge | Polarity | Monoisotopic |
|---|--------|------------|------------|--------|----------|--------------|---|--------|------------|------------|--------|----------|--------------|
| 1 | 292.05 | 246719     | 100.00     |        |          |              | 4 | 295.00 | 13930      | 5.65       |        |          |              |
| 2 | 293.05 | 41250      | 16.72      |        |          |              | 5 | 333.05 | 5381       | 2.18       |        |          |              |
| 3 | 294.05 | 78405      | 31.78      |        |          |              |   |        |            |            |        |          |              |

Figure S222 LCMS spectrum of compound NPD-3293

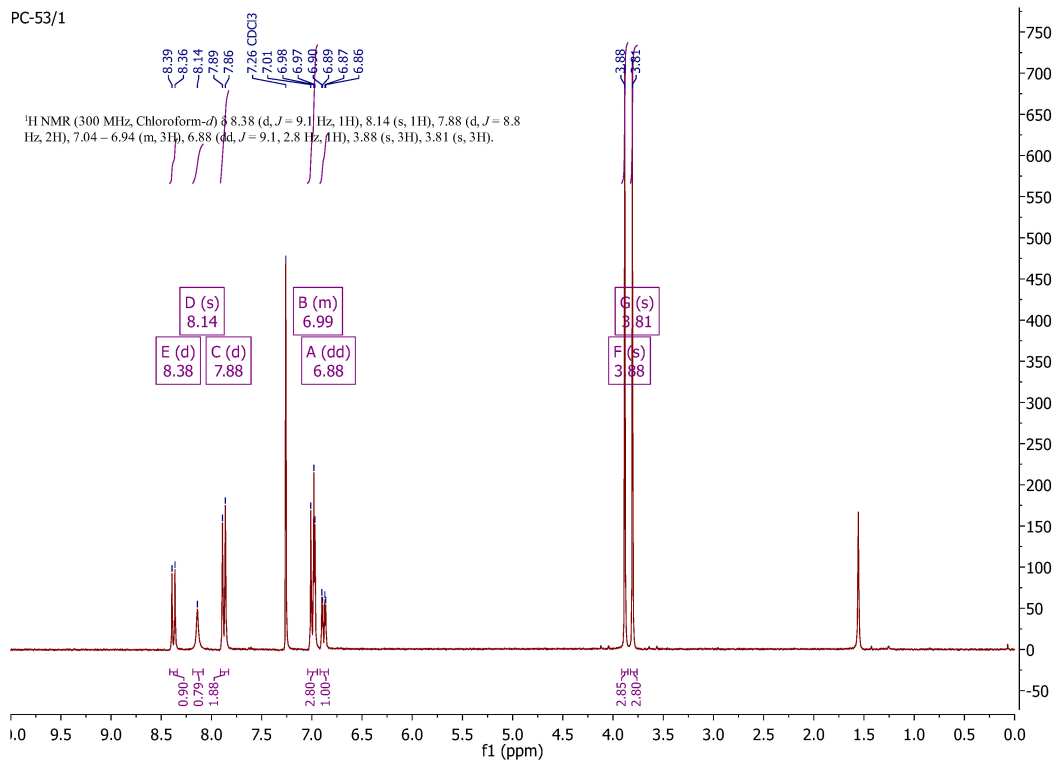

Figure S223  $^1\text{H}$  NMR spectrum of compound NPD-3293

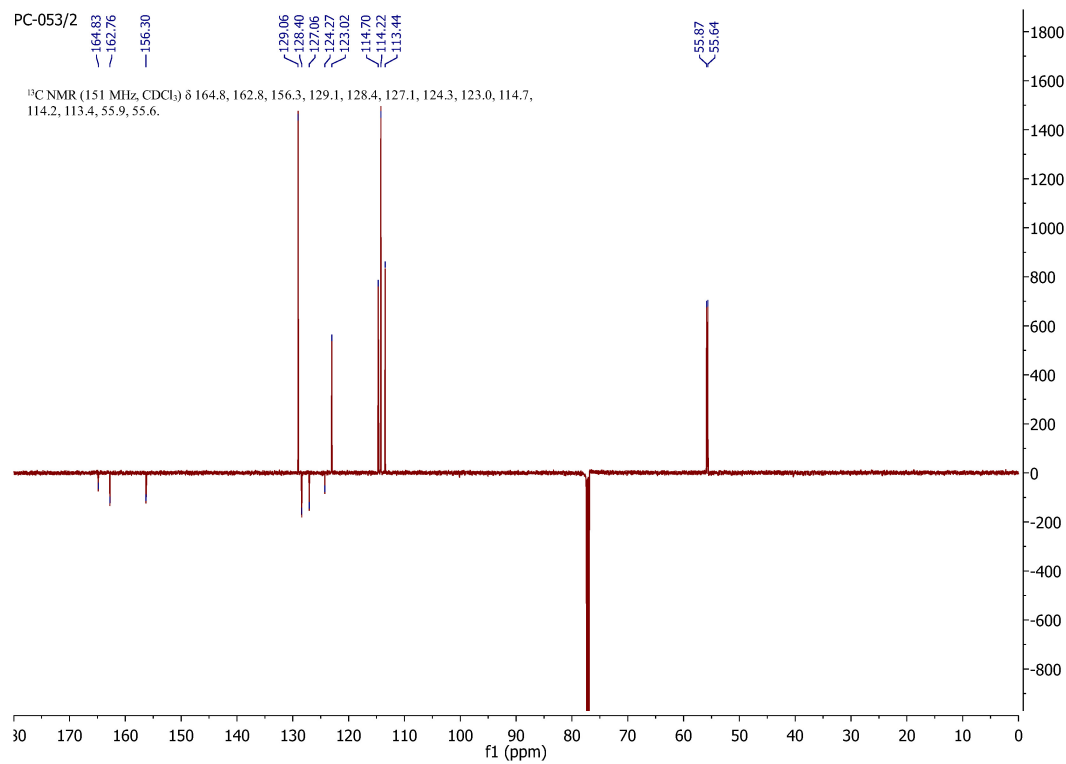

Figure S224  $^{13}\text{C}$  NMR spectrum of compound NPD-3293

Acquired by : Admin  
 Date Acquired : 21/2/2018 3:44:46 PM  
 Sample Name : PC-159  
 Sample ID :  
 Tray# : 1  
 Vial# : 32  
 Injection Volume : 1  
 Data File : C:\LabSolutions\Data\2018\2018-wk08\PC-159.lcd  
 Background File : blanco 21022018.lcd  
 Method File : Method SCAN ACID standard.lcm  
 Report Format : DefaultLCMS.lcr  
 Tuning File : C:\LabSolutions\Tuning\Tuning-ESI-pos-neg01072015a.lct  
 Processed by : Admin  
 Modified Date : 21/2/2018 3:58:32 PM

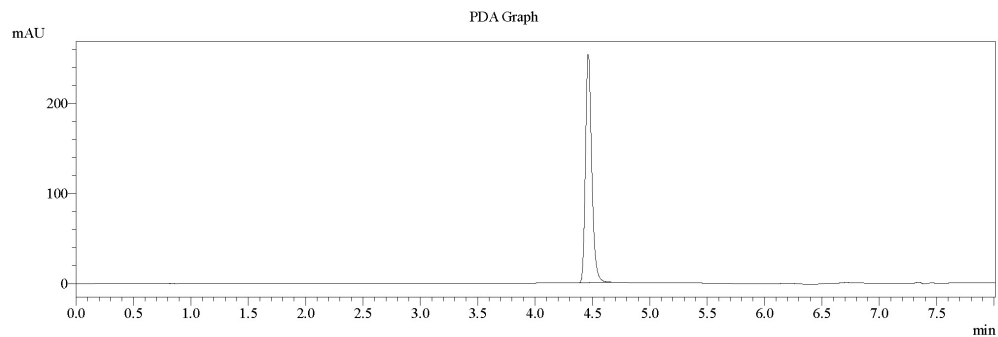

PDA Ch1 254nm 4nm

| Peak# | Name | Ret. Time | Area   | Area %  |
|-------|------|-----------|--------|---------|
| 1     |      | 4.458     | 971595 | 100.000 |

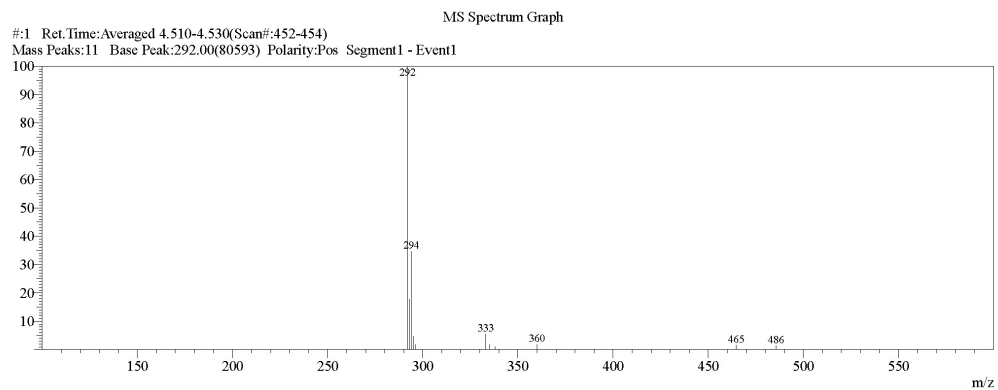

MS Spectrum Table

#1 Ret.Time:  
 BG Mode:Calc 4.420<=>4.650(443<=>466)

| # | m/z    | Abs.Inten. | Rel.Inten. | Charge | Polarity | Monoisotopic | #  | m/z    | Abs.Inten. | Rel.Inten. | Charge | Polarity | Monoisotopic |
|---|--------|------------|------------|--------|----------|--------------|----|--------|------------|------------|--------|----------|--------------|
| 1 | 292.00 | 80593      | 100.00     |        |          |              | 7  | 335.10 | 1402       | 1.74       |        |          |              |
| 2 | 293.00 | 14279      | 17.72      |        |          |              | 8  | 338.00 | 903        | 1.12       |        |          |              |
| 3 | 294.00 | 27976      | 34.71      |        |          |              | 9  | 359.95 | 1511       | 1.87       |        |          |              |
| 4 | 295.10 | 3835       | 4.76       |        |          |              | 10 | 464.80 | 1265       | 1.57       |        |          |              |
| 5 | 296.10 | 1420       | 1.76       |        |          |              | 11 | 485.80 | 1108       | 1.37       |        |          |              |
| 6 | 333.00 | 4410       | 5.47       |        |          |              |    |        |            |            |        |          |              |

**Figure S225 LCMS spectrum of compound NPD-3294**

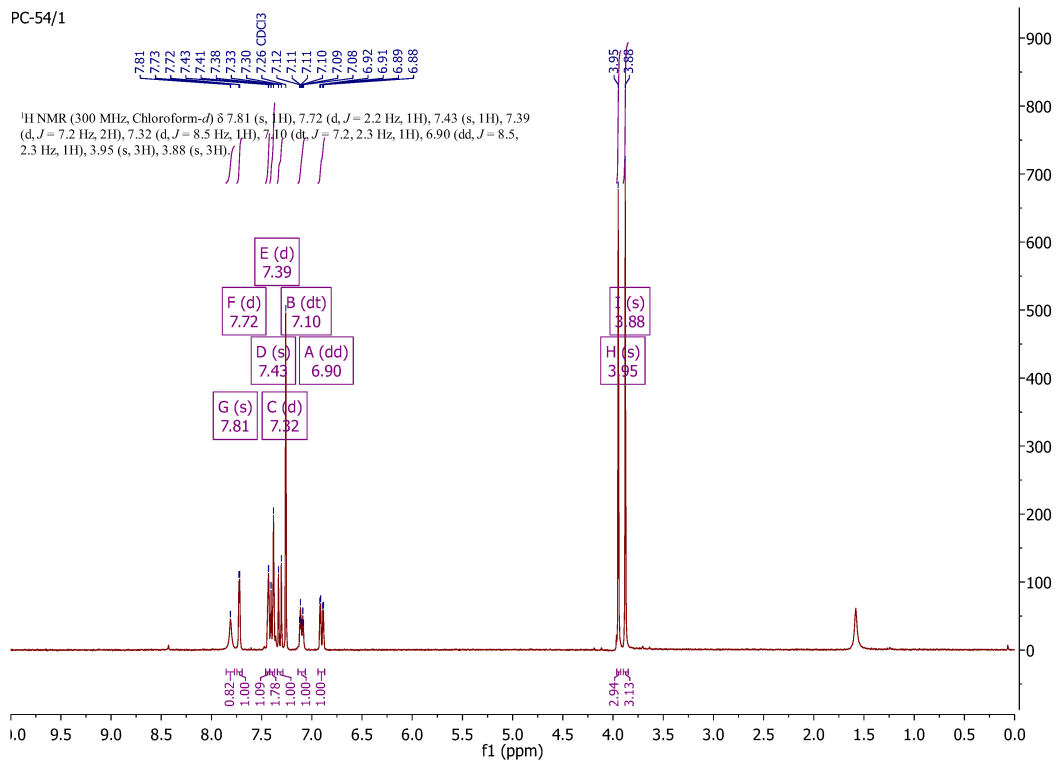

Figure S226  $^1\text{H}$  NMR spectrum of compound NPD-3294

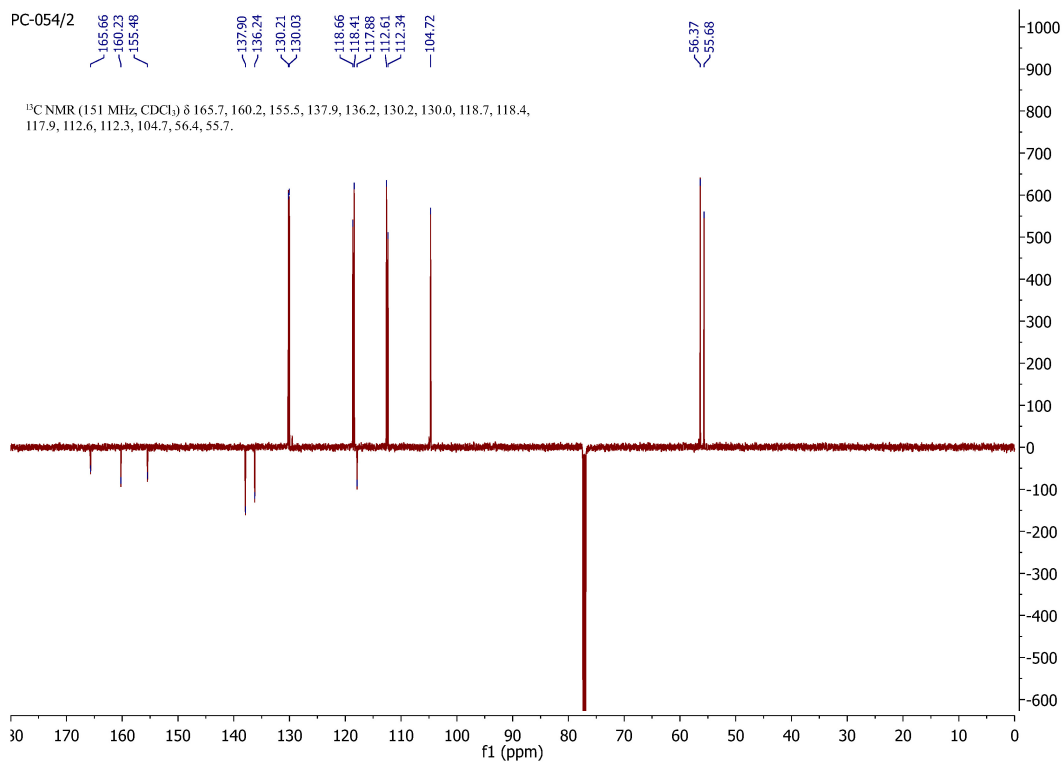

Figure S227  $^{13}\text{C}$  NMR spectrum of compound NPD-3294



Acquired by : Admin  
Date Acquired : 26/2/2018 10:19:23 AM  
Sample Name : PC-161  
Sample ID :  
Tray# : 1  
Vial# : 3  
Injection Volume : 1  
Data File : C:\LabSolutions\Data\2018\2018-wk09\PC-161.lcd  
Background File : Blanco\_26022018.lcd  
Method File : Method SCAN ACID standard.lcm  
Report Format : DefaultLCMS.lcr  
Tuning File : C:\LabSolutions\Tuning\Tuning-ESI-pos-neg01072015a.lct  
Processed by : Admin  
Modified Date : 26/2/2018 10:31:42 AM

Medicinal Chemistry  
Vrije Universiteit Amsterdam

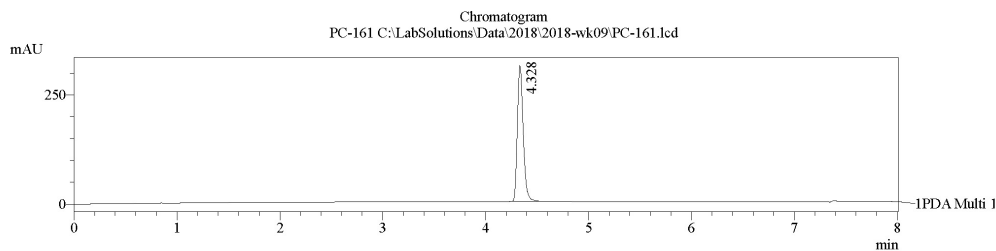

1 PDA Multi 1 / 254nm 4nm

PDA Ch1 254nm 4nm

| Peak# | Name | Ret. Time | Area    | Area %  |
|-------|------|-----------|---------|---------|
| 1     |      | 4.328     | 1216400 | 100.000 |

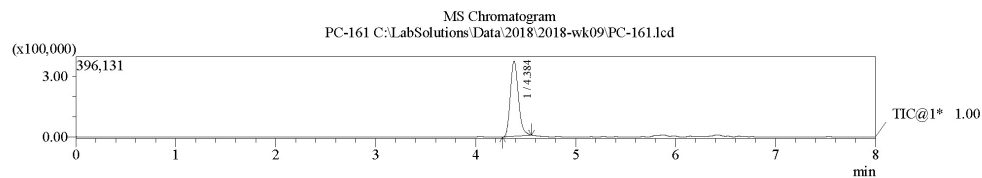

#1 Ret.Time:Averaged 4.370-4.390(Scan#:438-440)

Mass Peaks:7 Base Peak:292.00(245124) Polarity:Pos Segment1 - Event1

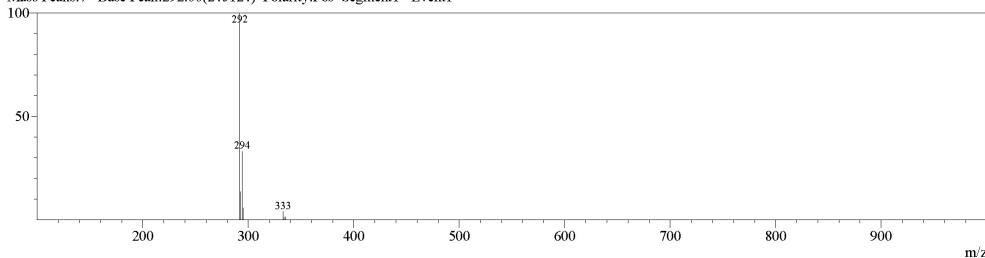

MS Spectrum Table

#1 Ret.Time:

BG Mode:Calc 4.270<->4.560(428<->457)

Mass Peaks:7 Base Peak:292.00(245124) Polarity:Pos Segment1 - Event1

| # | m/z    | Abs.Inten. | Rel.Inten. | Charge | Polarity | Monoisotopic | # | m/z    | Abs.Inten. | Rel.Inten. | Charge | Polarity | Monoisotopic |
|---|--------|------------|------------|--------|----------|--------------|---|--------|------------|------------|--------|----------|--------------|
| 1 | 292.00 | 245124     | 100.00     |        |          |              | 5 | 333.10 | 9442       | 3.85       |        |          |              |
| 2 | 293.00 | 33269      | 13.57      |        |          |              | 6 | 334.00 | 2712       | 1.11       |        |          |              |
| 3 | 294.00 | 80877      | 32.99      |        |          |              | 7 | 335.10 | 3083       | 1.26       |        |          |              |
| 4 | 295.00 | 14030      | 5.72       |        |          |              |   |        |            |            |        |          |              |

Figure S228 LCMS spectrum of compound NPD-3295

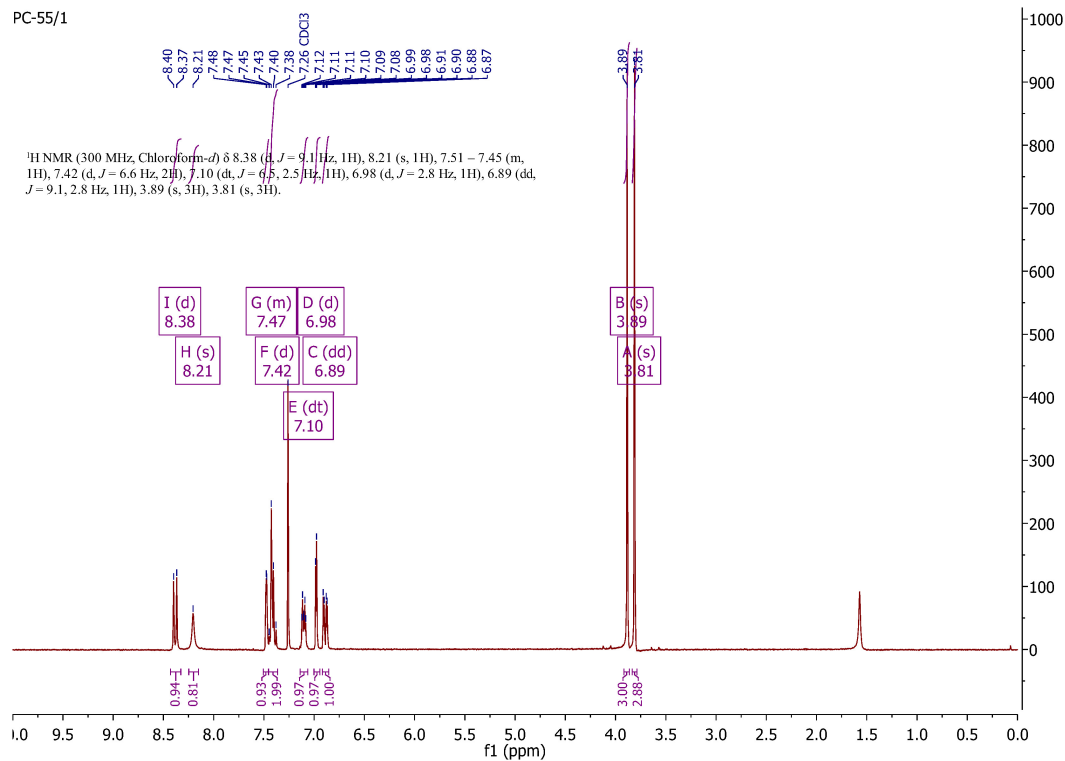

Figure S229 <sup>1</sup>H NMR spectrum of compound NPD-3295

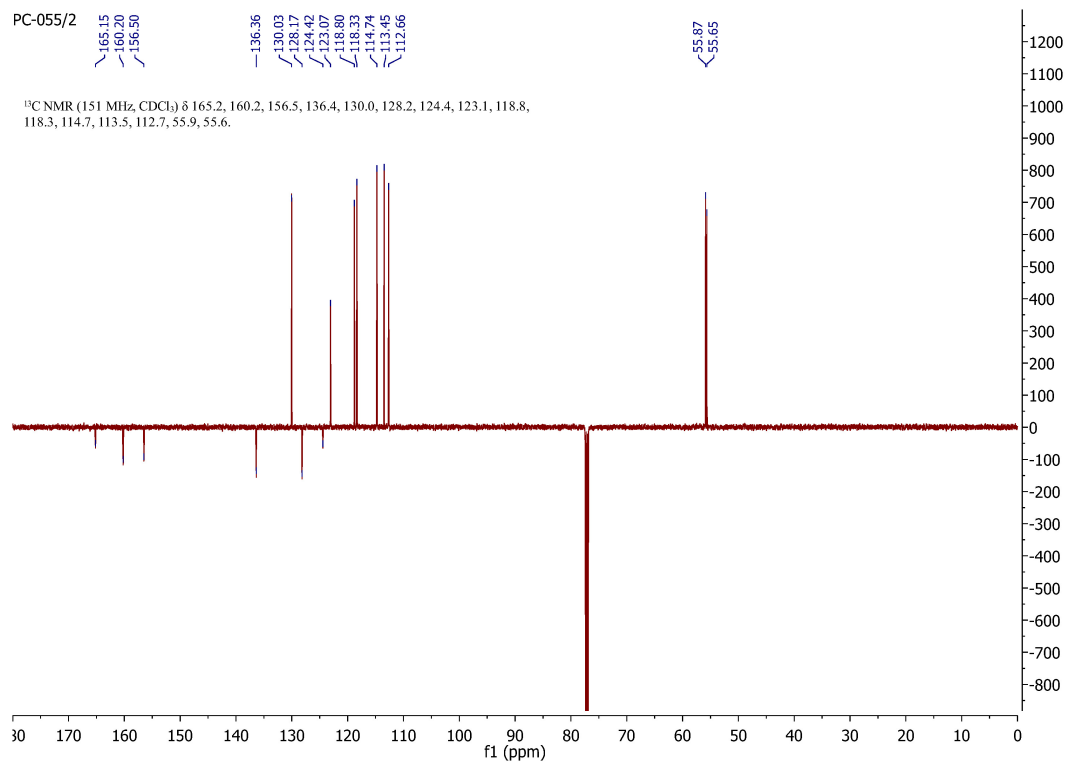

Figure S230 <sup>13</sup>C NMR spectrum of compound NPD-3295

Acquired by : Admin  
 Date Acquired : 26/2/2018 10:28:00 AM  
 Sample Name : PC-162  
 Sample ID :  
 Tray# : 1  
 Vial# : 4  
 Injection Volume :  
 Data File : C:\LabSolutions\Data\2018\2018-wk09\PC-162.lcd  
 Background File : Blanco\_26022018.lcd  
 Method File : Method SCAN ACID standard.lcm  
 Report Format : DefaultL.CMS.lcr  
 Tuning File : C:\LabSolutions\Tuning\Tuning-ESI-pos-neg01072015a.lct  
 Processed by : Admin  
 Modified Date : 26/2/2018 10:43:14 AM

Medicinal Chemistry  
 Vrije Universiteit Amsterdam

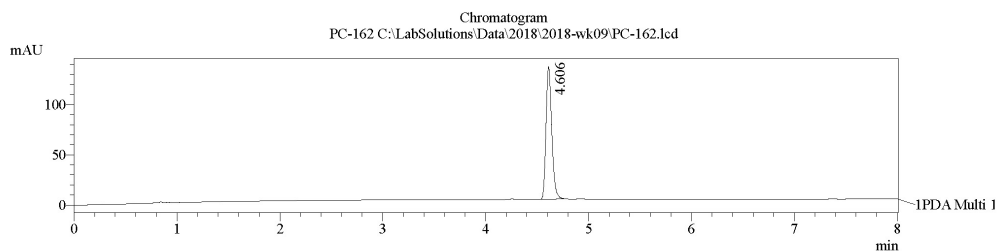

1 PDA Multi 1 / 254nm 4nm

PDA Ch1 254nm 4nm

| Peak# | Name | Ret. Time | Area   | Area %  |
|-------|------|-----------|--------|---------|
| 1     |      | 4.606     | 514067 | 100.000 |

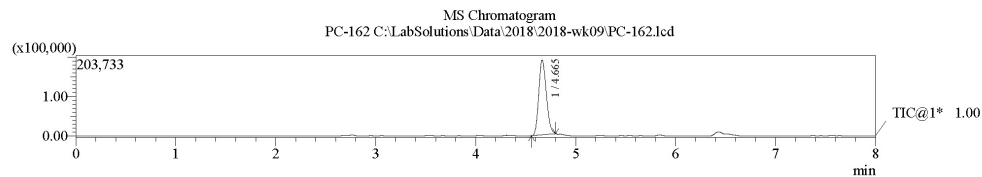

MS Spectrum Graph

#1 Ret.Time:Averaged 4.660-4.680(Scan#:467-469)

Mass Peaks:8 Base Peak:306.05(112146) Polarity:Pos Segment1 - Event1

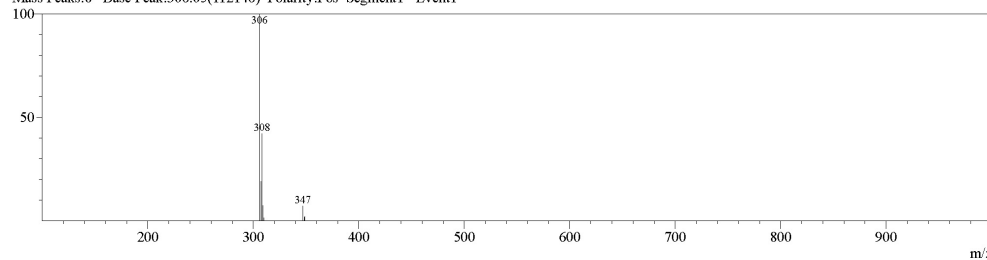

MS Spectrum Table

#1 Ret.Time:

BG Mode:Calc 4.560<=>4.800(457<=>481)

Mass Peaks:8 Base Peak:306.05(112146) Polarity:Pos Segment1 - Event1

| # | m/z    | Abs.Inten. | Rel.Inten. | Charge | Polarity | Monoisotopic | # | m/z    | Abs.Inten. | Rel.Inten. | Charge | Polarity | Monoisotopic |
|---|--------|------------|------------|--------|----------|--------------|---|--------|------------|------------|--------|----------|--------------|
| 1 | 306.05 | 112146     | 100.00     |        |          |              | 5 | 310.05 | 1551       | 1.38       |        |          |              |
| 2 | 307.05 | 21393      | 19.08      |        |          |              | 6 | 347.15 | 8050       | 7.18       |        |          |              |
| 3 | 308.05 | 47234      | 42.12      |        |          |              | 7 | 348.20 | 1764       | 1.57       |        |          |              |
| 4 | 309.05 | 8193       | 7.31       |        |          |              | 8 | 349.00 | 2376       | 2.12       |        |          |              |

Figure S231 LCMS spectrum of compound NPD-3296

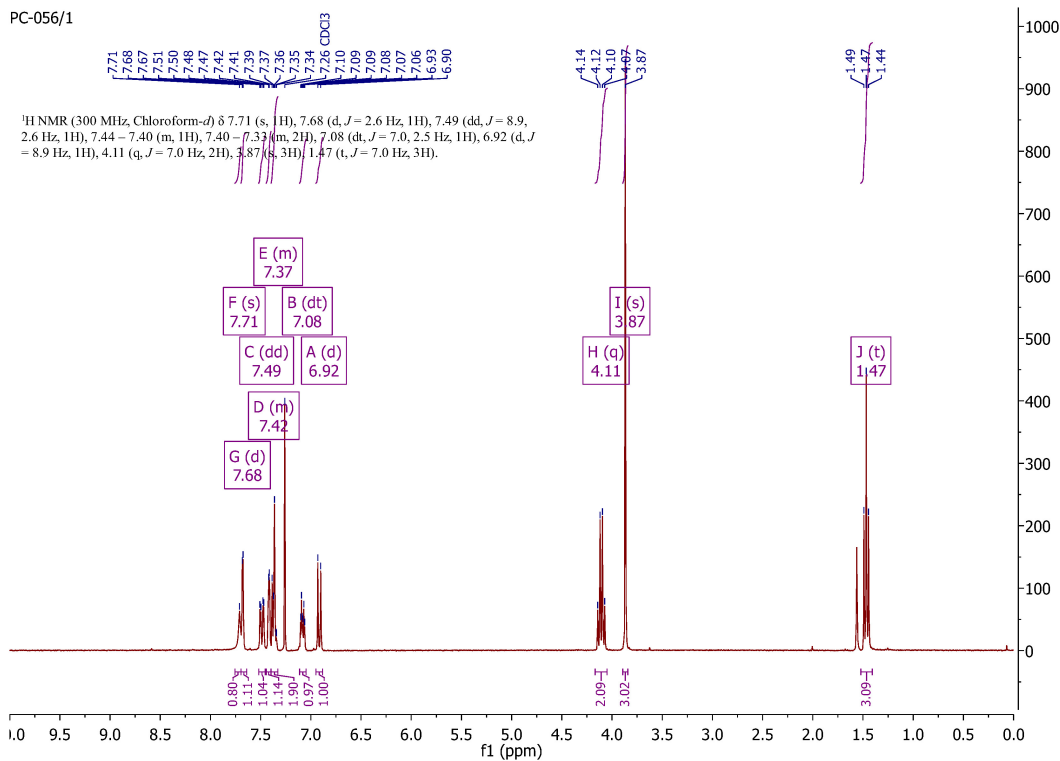

Figure S232  $^1\text{H}$  NMR spectrum of compound NPD-3296

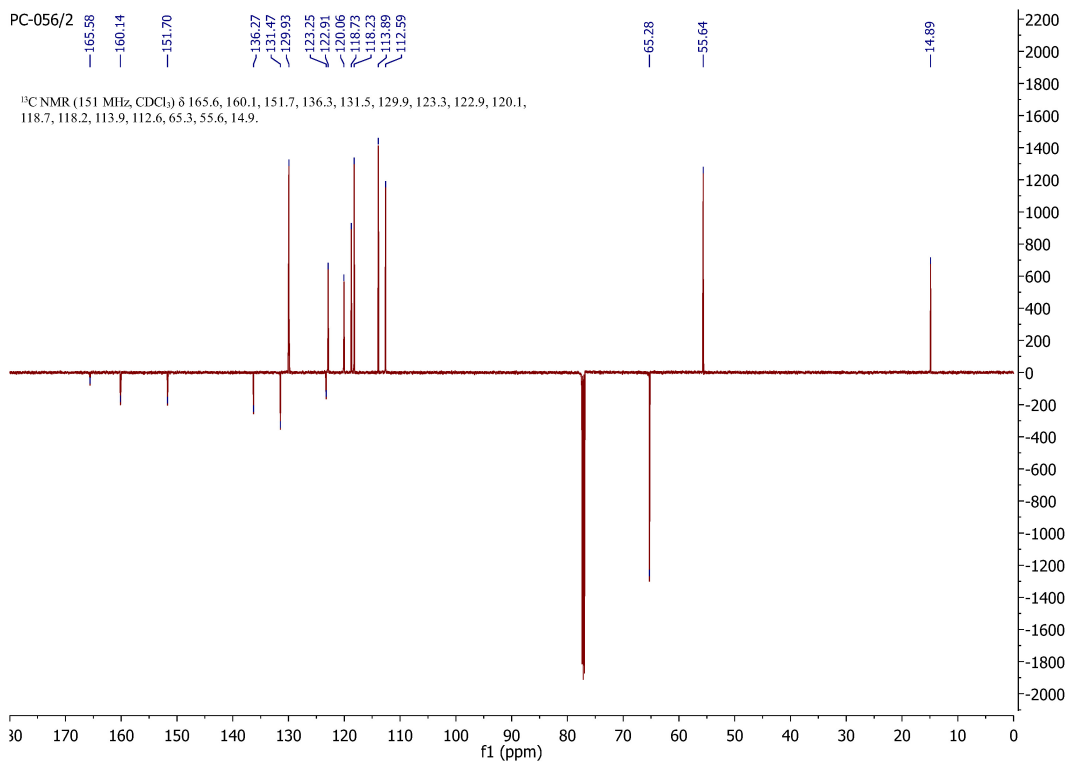

Figure S233  $^{13}\text{C}$  NMR spectrum of compound NPD-3296

Acquired by : Admin  
 Date Acquired : 26/2/2018 11:45:35 AM  
 Sample Name : PC-163  
 Sample ID :  
 Tray# : 1  
 Vial# : 8  
 Injection Volume : 3  
 Data File : C:\LabSolutions\Data\2018\2018-wk09\PC-163-1.lcd  
 Background File : Blanco\_26022018.lcd  
 Method File : Method SCAN ACID standard.lcm  
 Report Format : DefaultLCMS.lcr  
 Tuning File : C:\LabSolutions\Tuning\Tuning-ESI-pos-neg01072015a.lct  
 Processed by : Admin  
 Modified Date : 26/2/2018 12:23:22 PM

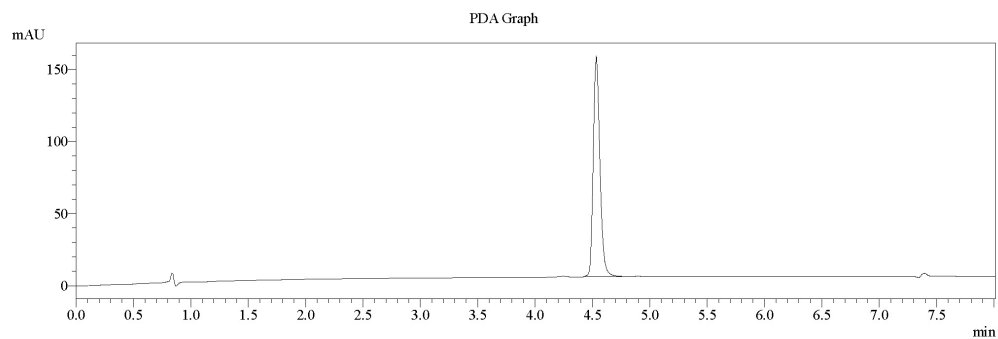

PDA Ch1 254nm 4nm

| Peak# | Name | Ret. Time | Area   | Area %  |
|-------|------|-----------|--------|---------|
| 1     |      | 4.528     | 608948 | 100.000 |

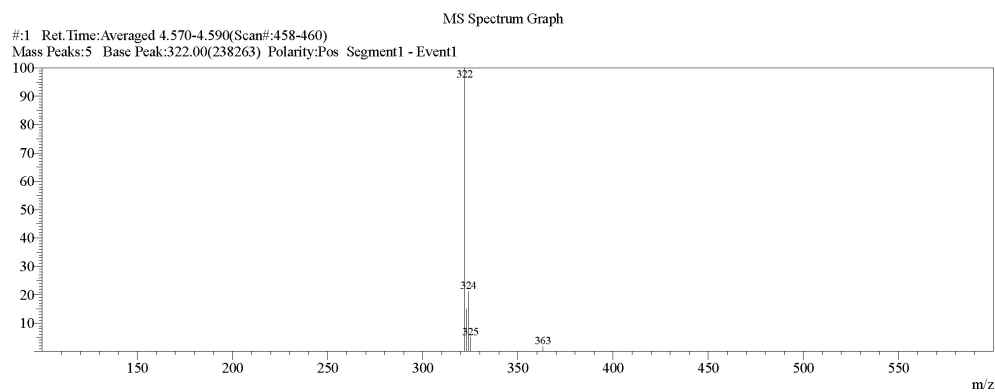

MS Spectrum Table

#1 Ret.Time:  
 BG Mode:Calc 4.470<=>4.740(448<=>475)  
 Mass Peaks:5 Base Peak:322.00(238263) Polarity:Pos Segment1 - Event1

| # | m/z    | Abs.Inten. | Rel.Inten. | Charge | Polarity | Monoisotopic | # | m/z    | Abs.Inten. | Rel.Inten. | Charge | Polarity | Monoisotopic |
|---|--------|------------|------------|--------|----------|--------------|---|--------|------------|------------|--------|----------|--------------|
| 1 | 322.00 | 238263     | 100.00     |        |          |              | 4 | 325.05 | 11620      | 4.88       |        |          |              |
| 2 | 323.10 | 35687      | 14.98      |        |          |              | 5 | 363.05 | 4028       | 1.69       |        |          |              |
| 3 | 324.05 | 50159      | 21.05      |        |          |              |   |        |            |            |        |          |              |

**Figure S234 LCMS spectrum of compound NPD-3297**

PC-057/1

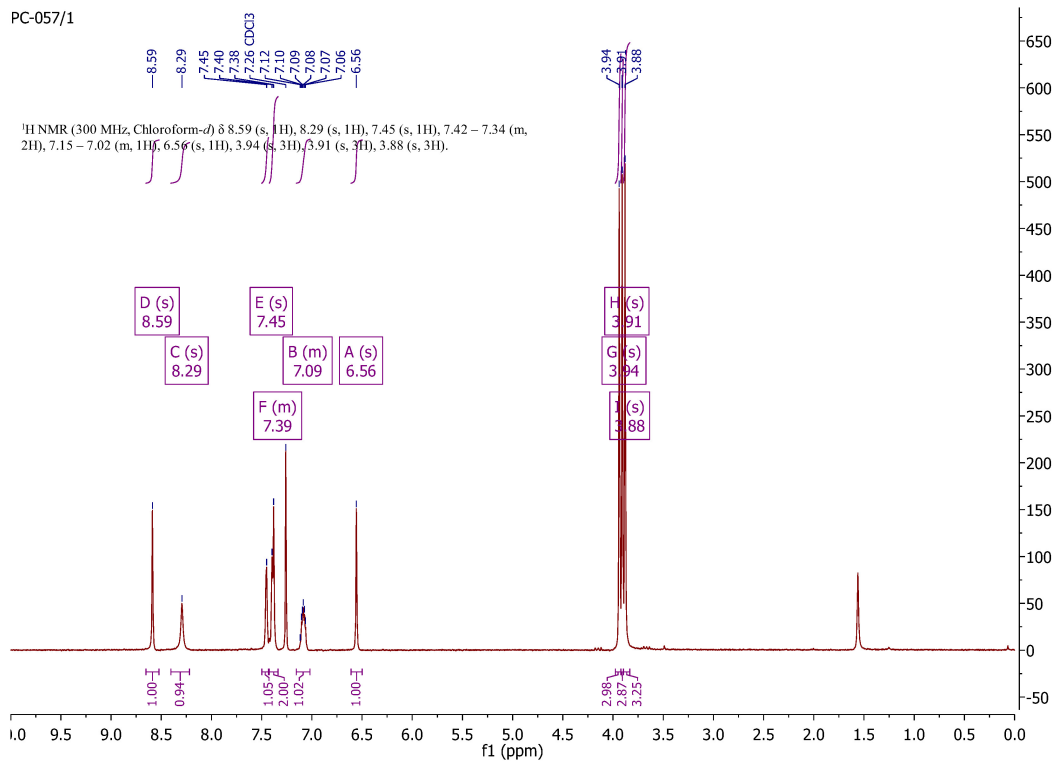Figure S235 <sup>1</sup>H NMR spectrum of compound NPD-3297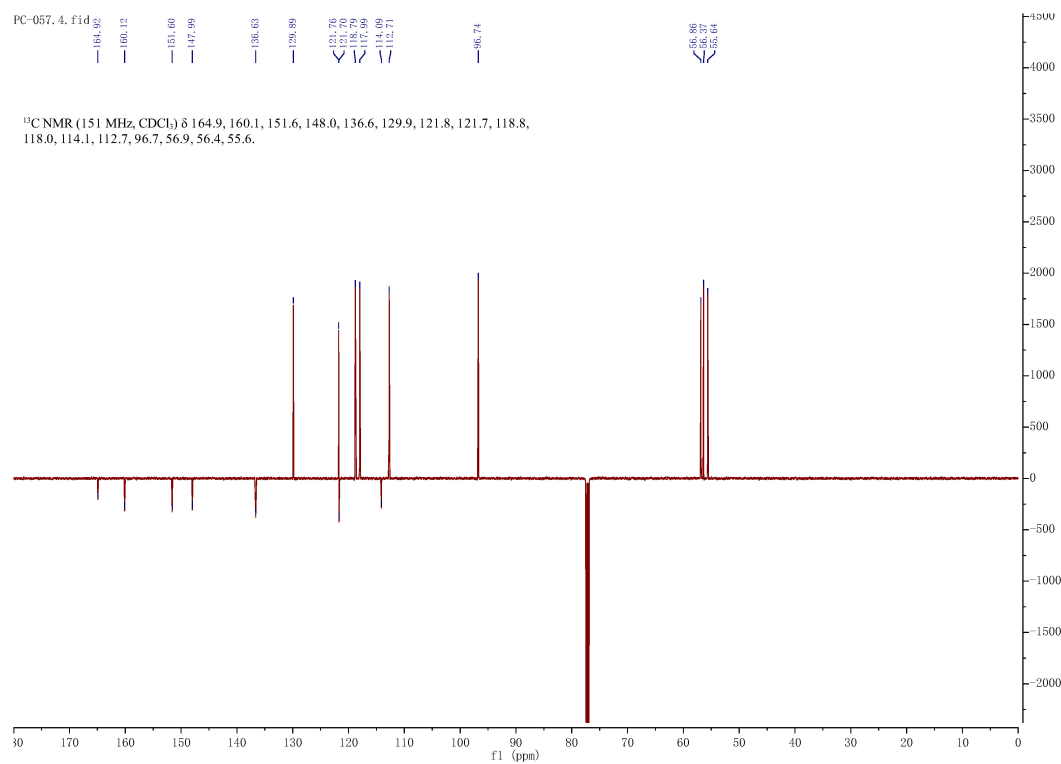Figure S236 <sup>13</sup>C NMR spectrum of compound NPD-3297

Acquired by : Admin  
 Date Acquired : 26/2/2018 11:11:08 AM  
 Sample Name : PC-165  
 Sample ID :  
 Tray# : 1  
 Vial# : 9  
 Injection Volume : 1  
 Data File : C:\LabSolutions\Data\2018\2018-wk09\PC-165.lcd  
 Background File : Blanco\_26022018.lcd  
 Method File : Method SCAN ACID standard.lcm  
 Report Format : DefaultLCMS.lcr  
 Tuning File : C:\LabSolutions\Tuning\Tuning-ESI-pos-neg01072015a.lct  
 Processed by : Admin  
 Modified Date : 26/2/2018 11:23:02 AM

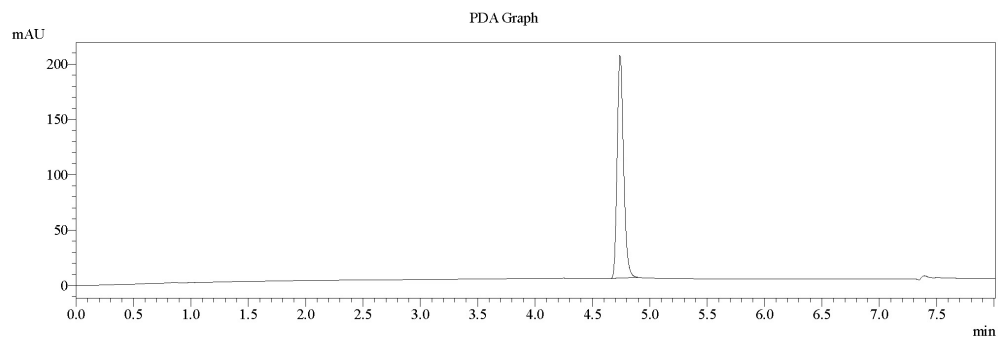

PDA Ch1 254nm 4nm

| Peak# | Name | Ret. Time | Area   | Area %  |
|-------|------|-----------|--------|---------|
| 1     |      | 4.735     | 787463 | 100.000 |

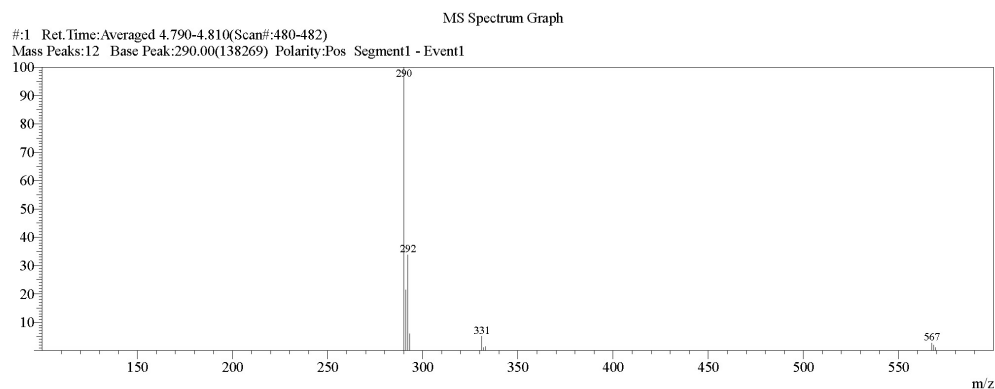

MS Spectrum Table

#1 Ret.Time:  
 BG Mode:Calc 4.690<->4.930(470<->494)  
 Mass Peaks:12 Base Peak:290.00(138269) Polarity:Pos Segment1 - Event1

| # | m/z    | Abs.Inten. | Rel.Inten. | Charge | Polarity | Monoisotopic | #  | m/z    | Abs.Inten. | Rel.Inten. | Charge | Polarity | Monoisotopic |
|---|--------|------------|------------|--------|----------|--------------|----|--------|------------|------------|--------|----------|--------------|
| 1 | 290.00 | 138269     | 100.00     |        |          |              | 7  | 333.15 | 2105       | 1.52       |        |          |              |
| 2 | 291.05 | 29704      | 21.48      |        |          |              | 8  | 567.40 | 3766       | 2.72       |        |          |              |
| 3 | 292.10 | 46657      | 33.74      |        |          |              | 9  | 568.50 | 2826       | 2.04       |        |          |              |
| 4 | 293.10 | 8236       | 5.96       |        |          |              | 10 | 569.45 | 1539       | 1.11       |        |          |              |
| 5 | 331.00 | 6970       | 5.04       |        |          |              | 11 | 688.20 | 1420       | 1.03       |        |          |              |
| 6 | 332.00 | 1636       | 1.18       |        |          |              | 12 | 690.25 | 2169       | 1.57       |        |          |              |

**Figure S237 LCMS spectrum of compound NPD-3298**

PC-058/1

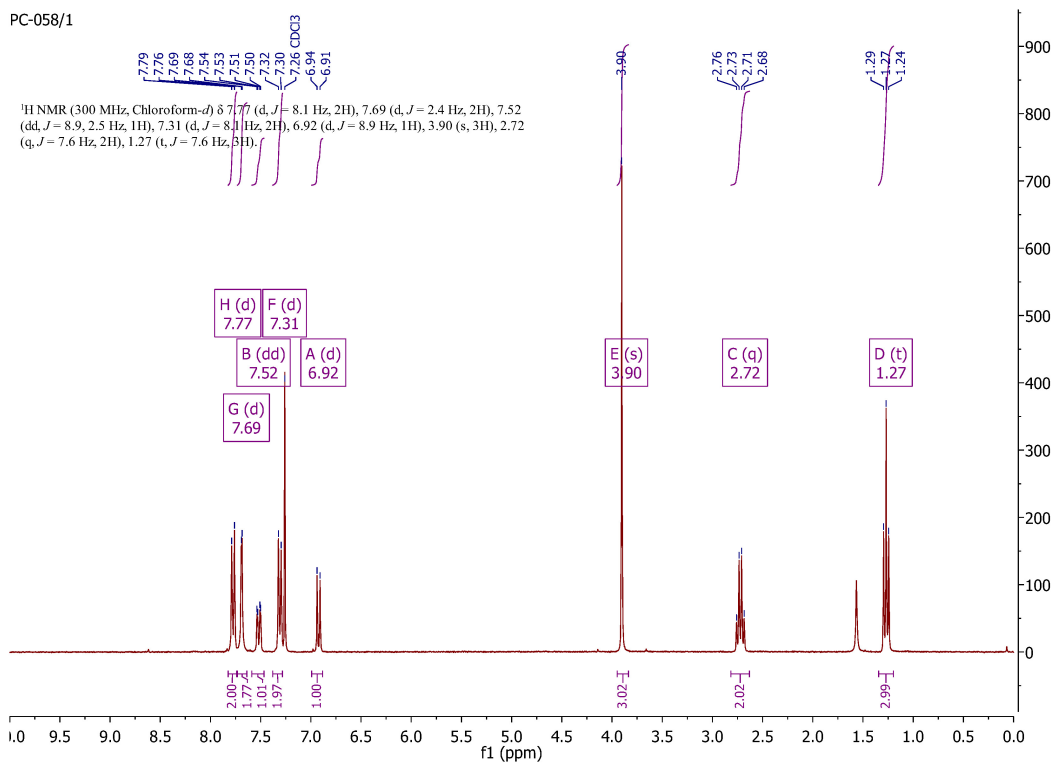Figure S238 <sup>1</sup>H NMR spectrum of compound NPD-3298

PC-058/2

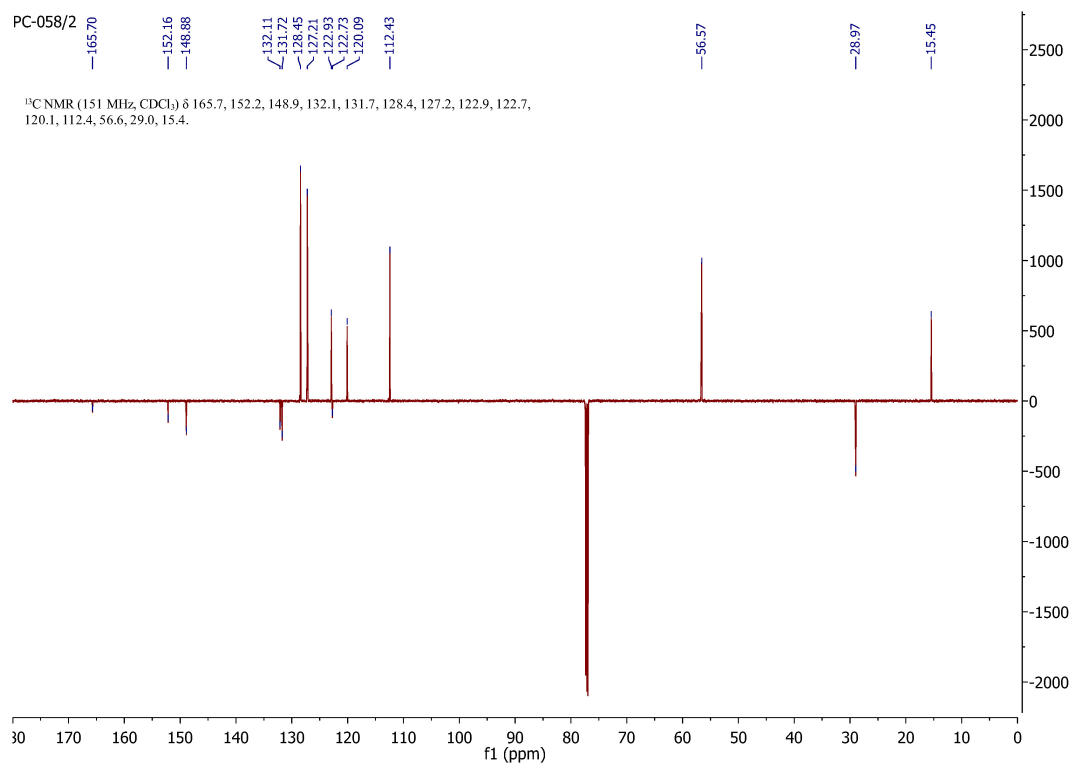Figure S239 <sup>13</sup>C NMR spectrum of compound NPD-3298



Acquired by : Admin  
 Date Acquired : 26/2/2018 11:19:45 AM  
 Sample Name : PC-166  
 Sample ID :  
 Tray# : 1  
 Vial# : 10  
 Injection Volume : 1  
 Data File : C:\LabSolutions\Data\2018\2018-wk09\PC-166.Lcd  
 Background File : Blanco\_26022018.Lcd  
 Method File : Method SCAN ACID standard.lcm  
 Report Format : DefaultLCMS.lcr  
 Tuning File : C:\LabSolutions\Tuning\Tuning-ESI-pos-neg01072015a.lct  
 Processed by : Admin  
 Modified Date : 26/2/2018 12:24:34 PM

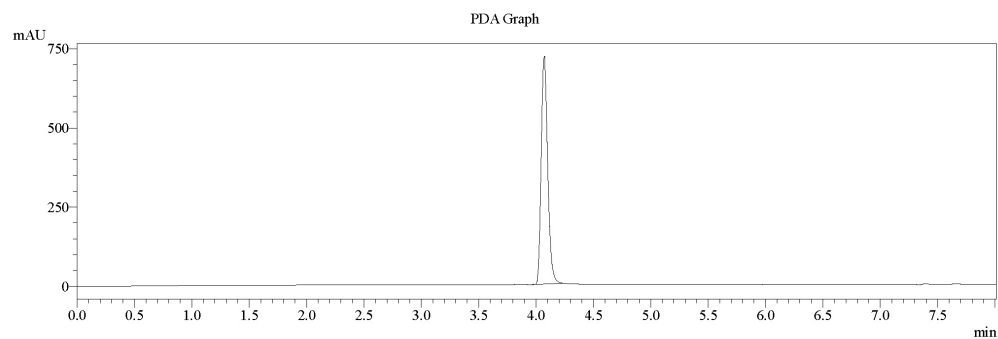

PDA Ch1 254nm 4nm

| Peak# | Name | Ret. Time | Area    | Area %  |
|-------|------|-----------|---------|---------|
| 1     |      | 4.065     | 2796959 | 100.000 |

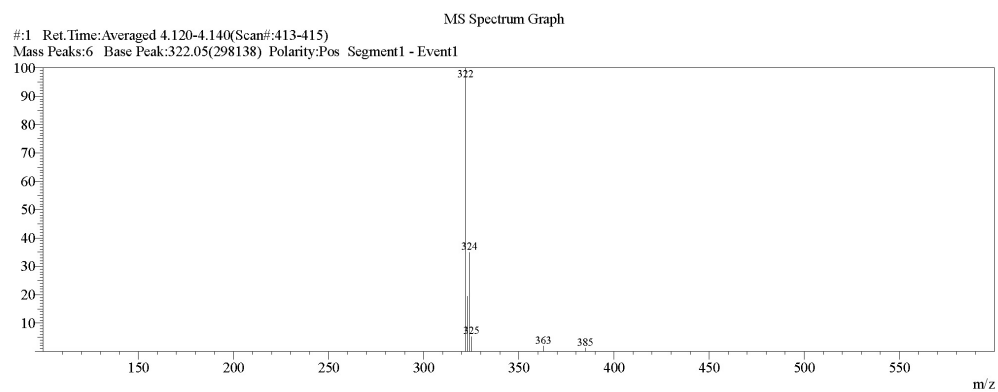

MS Spectrum Table

#1 Ret.Time:  
 BG Mode:Calc 4.020<->4.310(403<->432)  
 Mass Peaks:6 Base Peak:322.05(298138) Polarity:Pos Segment1 - Event1

| # | m/z    | Abs.Inten. | Rel.Inten. | Charge | Polarity | Monoisotopic | # | m/z    | Abs.Inten. | Rel.Inten. | Charge | Polarity | Monoisotopic |
|---|--------|------------|------------|--------|----------|--------------|---|--------|------------|------------|--------|----------|--------------|
| 1 | 322.05 | 298138     | 100.00     |        |          |              | 4 | 325.05 | 15475      | 5.19       |        |          |              |
| 2 | 323.05 | 57859      | 19.41      |        |          |              | 5 | 363.05 | 5473       | 1.84       |        |          |              |
| 3 | 324.05 | 104210     | 34.95      |        |          |              | 6 | 384.95 | 3319       | 1.11       |        |          |              |

**Figure S240 LCMS spectrum of compound NPD-3299**

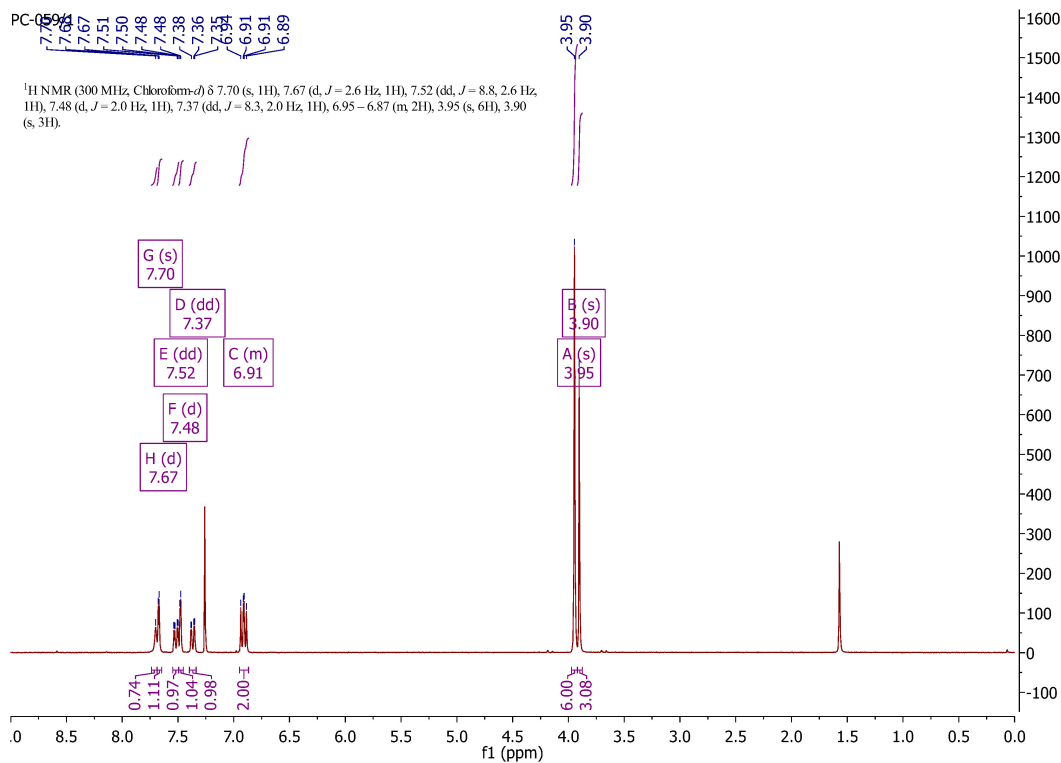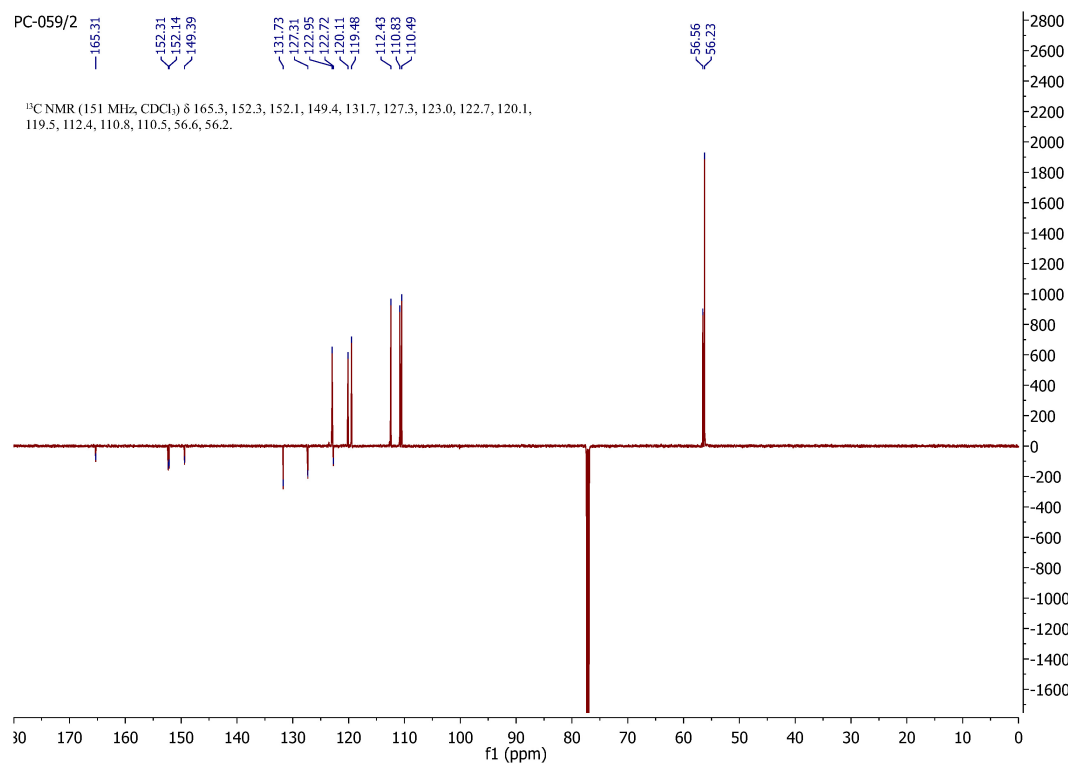

Acquired by : Admin  
 Date Acquired : 26/2/2018 11:36:57 AM  
 Sample Name : PC-167  
 Sample ID :  
 Tray# : 1  
 Vial# : 11  
 Injection Volume : 1  
 Data File : C:\LabSolutions\Data\2018\2018-wk09\PC-167.Lcd  
 Background File : Blanco\_26022018.Lcd  
 Method File : Method SCAN ACID standard.lcm  
 Report Format : DefaultLCMS.lcr  
 Tuning File : C:\LabSolutions\Tuning\Tuning-ESI-pos-neg01072015a.lct  
 Processed by : Admin  
 Modified Date : 26/2/2018 12:25:13 PM

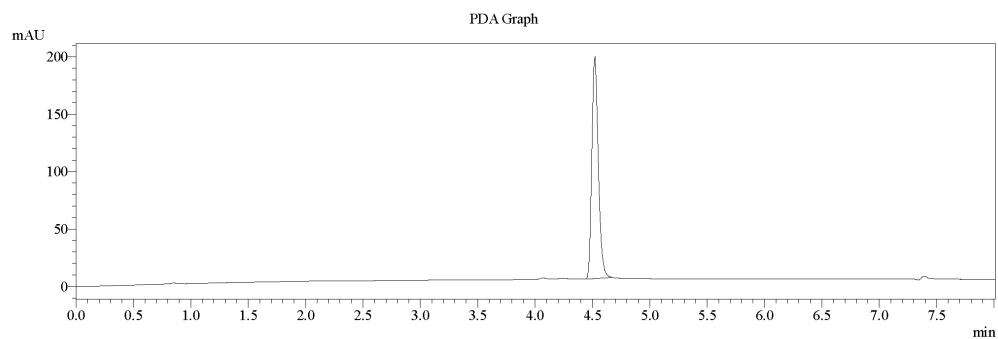

PDA Ch1 254nm 4nm

| Peak# | Name | Ret. Time | Area   | Area %  |
|-------|------|-----------|--------|---------|
| 1     |      | 4.515     | 752916 | 100.000 |

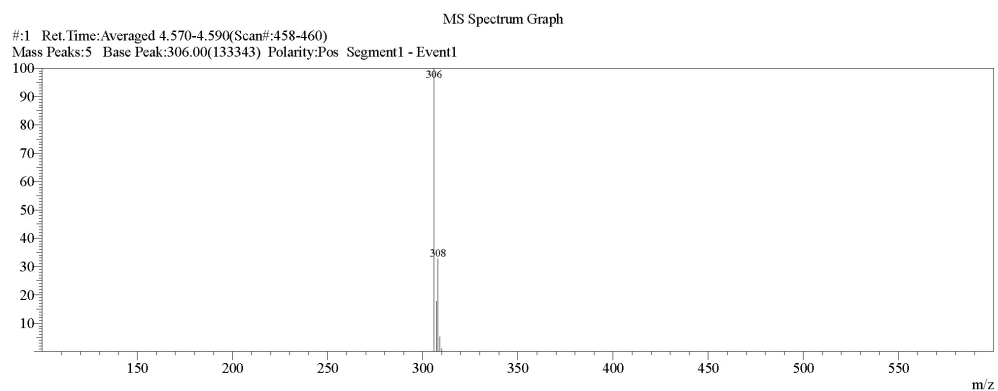

MS Spectrum Table

#1 Ret.Time:  
 BG Mode:Calc 4.470<->4.710(448<->472)  
 Mass Peaks:5 Base Peak:306.00(133343) Polarity:Pos Segment1 - Event1

| # | m/z    | Abs.Inten. | Rel.Inten. | Charge | Polarity | Monoisotopic | # | m/z    | Abs.Inten. | Rel.Inten. | Charge | Polarity | Monoisotopic |
|---|--------|------------|------------|--------|----------|--------------|---|--------|------------|------------|--------|----------|--------------|
| 1 | 306.00 | 133343     | 100.00     |        |          |              | 4 | 309.05 | 7035       | 5.28       |        |          |              |
| 2 | 307.05 | 23782      | 17.84      |        |          |              | 5 | 310.05 | 1413       | 1.06       |        |          |              |
| 3 | 308.05 | 43538      | 32.65      |        |          |              |   |        |            |            |        |          |              |

**Figure S243 LCMS spectrum of compound NPD-3300**

PC-060/1

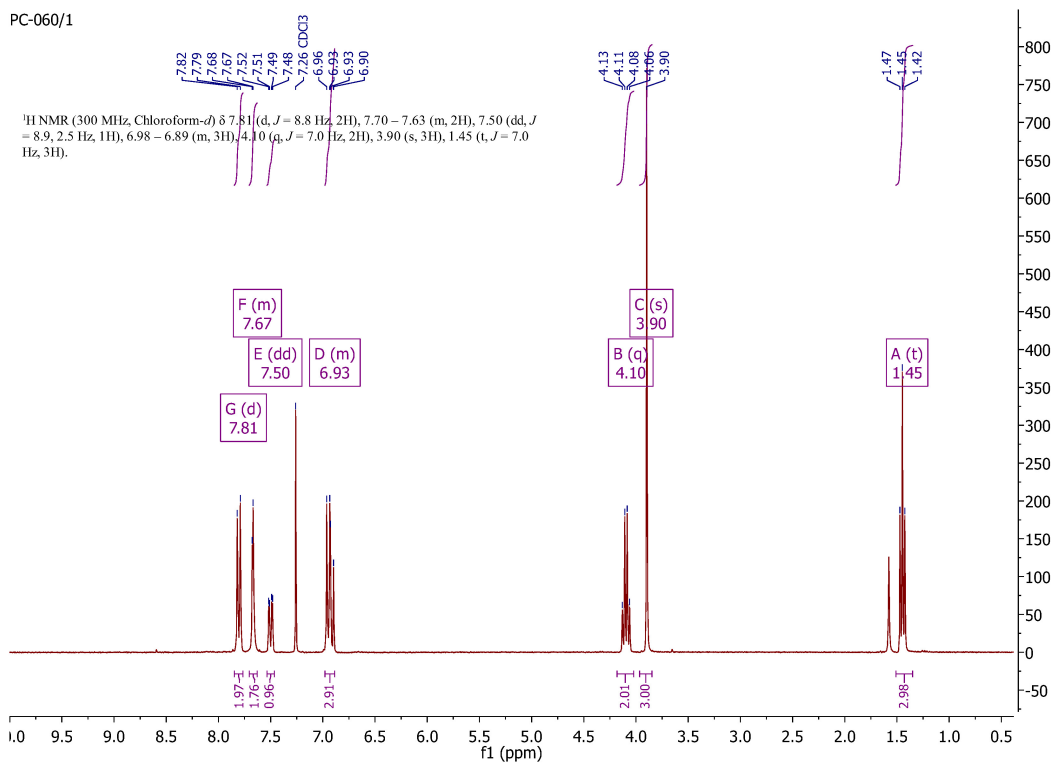Figure S244 <sup>1</sup>H NMR spectrum of compound NPD-3300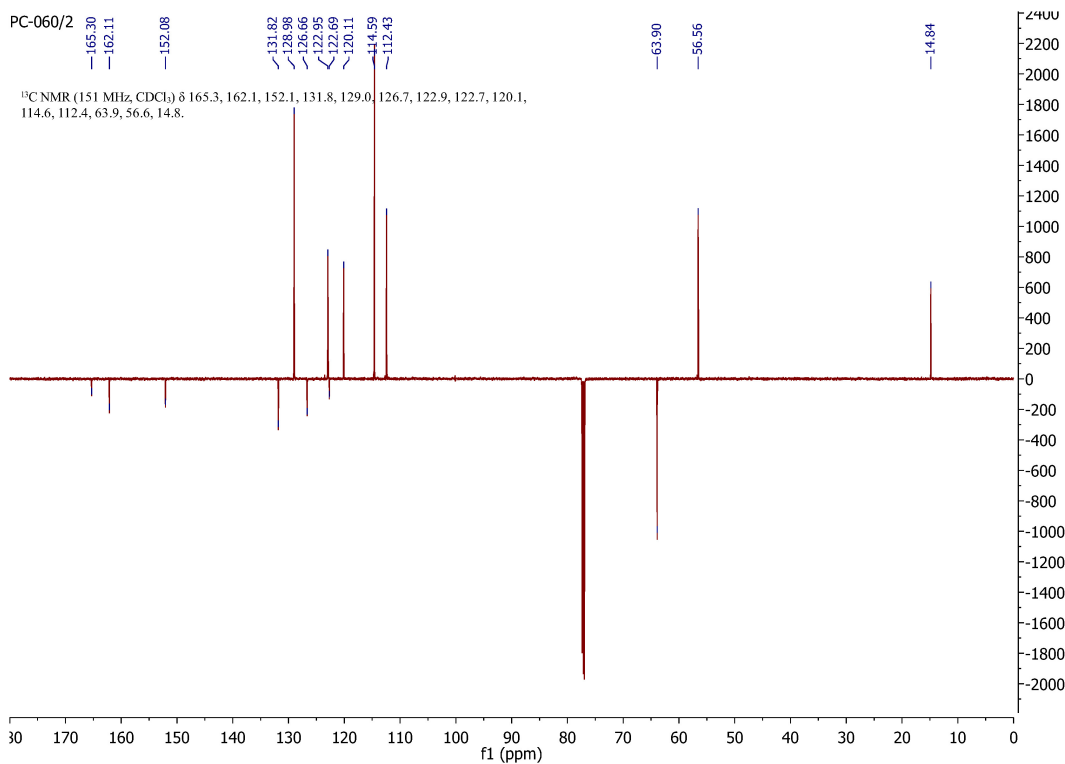Figure S245 <sup>13</sup>C NMR spectrum of compound NPD-3300

Acquired by : Admin  
 Date Acquired : 26/2/2018 12:45:53 PM  
 Sample Name : PC-168  
 Sample ID :  
 Tray# : 1  
 Vial# : 17  
 Injection Volume : 3  
 Data File : C:\LabSolutions\Data\2018\2018-wk09\PC-168.lcd  
 Background File : Blanco\_26022018.lcd  
 Method File : Method SCAN ACID standard.lcm  
 Report Format : Default LCMS.lcr  
 Tuning File : C:\LabSolutions\Tuning\Tuning-ESI-pos-neg01072015a.lct  
 Processed by : Admin  
 Modified Date : 26/2/2018 1:36:46 PM

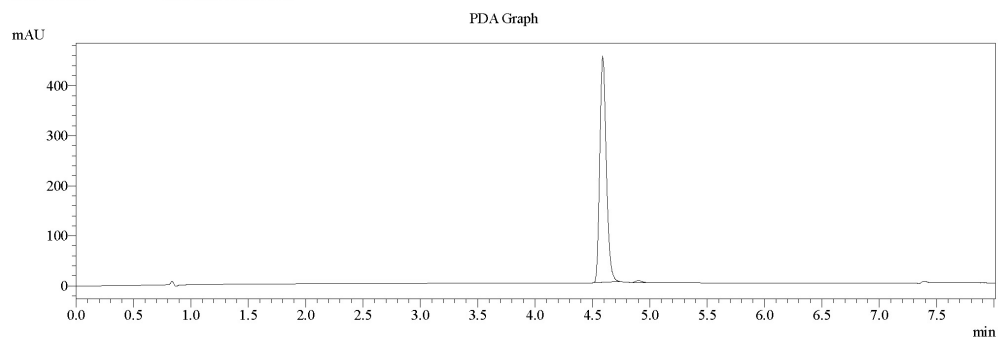

PDA Ch1 254nm 4nm

| Peak# | Name | Ret. Time | Area    | Area % |
|-------|------|-----------|---------|--------|
| 1     |      | 4.585     | 1795958 | 99.263 |
| 2     |      | 4.895     | 13330   | 0.737  |

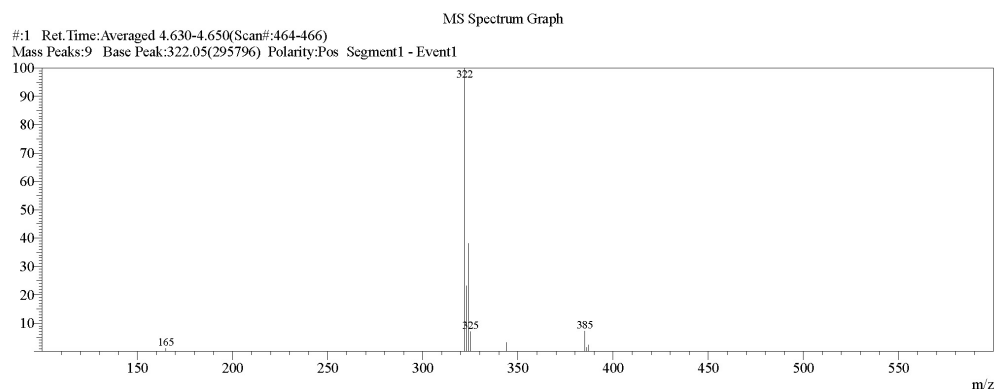

MS Spectrum Table

#1 Ret.Time:  
 BG Mode:Calc 4.530<->4.810(454<->482)  
 Mass Peaks:9 Base Peak:322.05(295796) Polarity:Pos Segment1 - Event1

| # | m/z    | Abs.Inten. | Rel.Inten. | Charge | Polarity | Monoisotopic | # | m/z    | Abs.Inten. | Rel.Inten. | Charge | Polarity | Monoisotopic |
|---|--------|------------|------------|--------|----------|--------------|---|--------|------------|------------|--------|----------|--------------|
| 1 | 164.95 | 3424       | 1.16       |        |          |              | 6 | 344.05 | 9240       | 3.12       |        |          |              |
| 2 | 322.05 | 295796     | 100.00     |        |          |              | 7 | 385.05 | 21226      | 7.18       |        |          |              |
| 3 | 323.00 | 68808      | 23.26      |        |          |              | 8 | 386.15 | 4237       | 1.43       |        |          |              |
| 4 | 323.95 | 112837     | 38.15      |        |          |              | 9 | 387.15 | 6883       | 2.33       |        |          |              |
| 5 | 325.05 | 20903      | 7.07       |        |          |              |   |        |            |            |        |          |              |

**Figure S246 LCMS spectrum of compound NPD-3301**

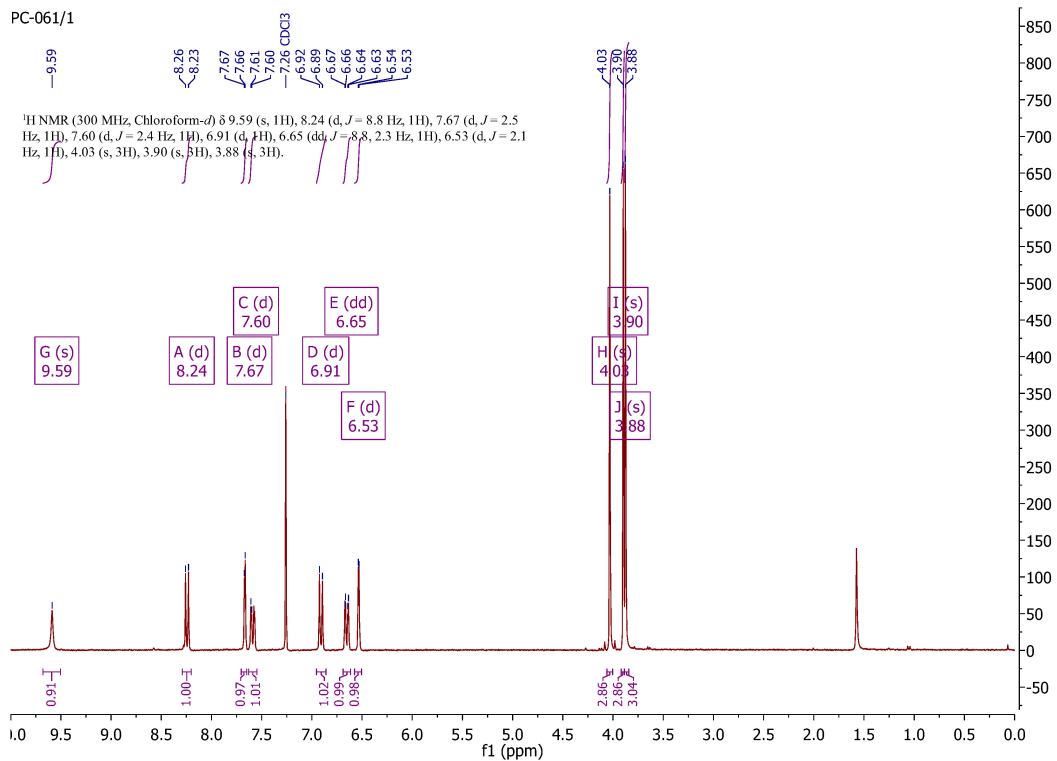

Figure S247  $^1\text{H}$  NMR spectrum of compound NPD-3301

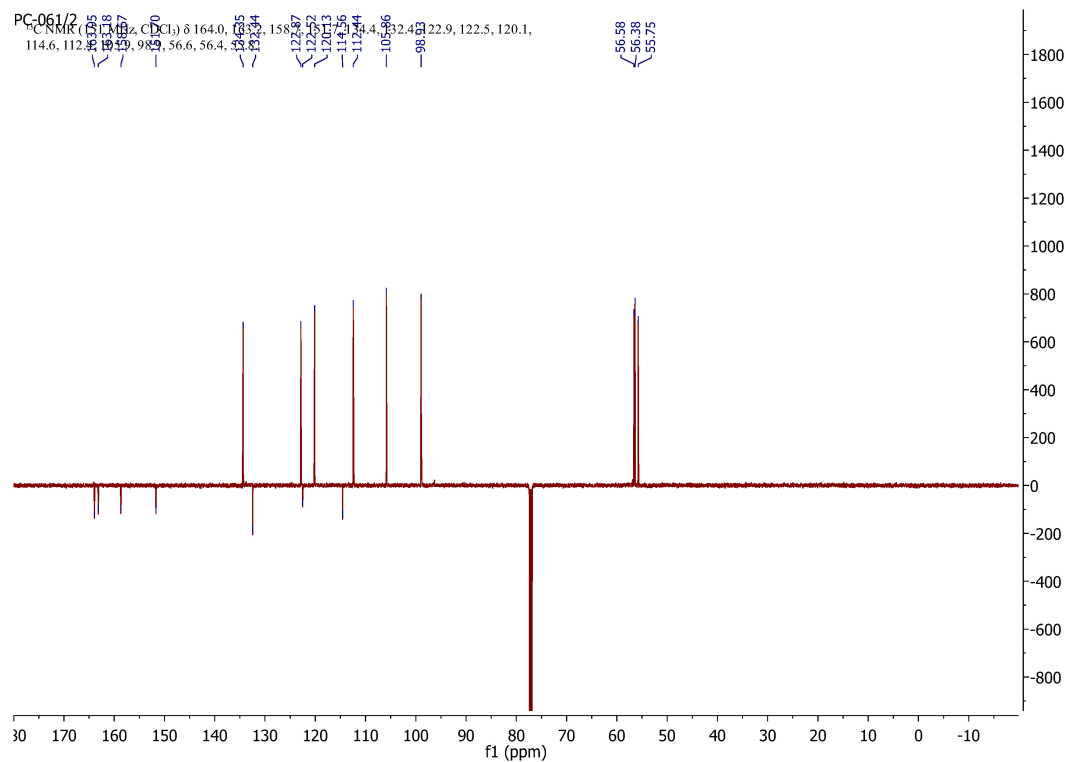

Figure S248  $^{13}\text{C}$  NMR spectrum of compound NPD-3301

Acquired by : Admin  
 Date Acquired : 26/2/2018 12:54:30 PM  
 Sample Name : PC-169  
 Sample ID :  
 Tray# : 1  
 Vial# : 18  
 Injection Volume : 3  
 Data File : C:\LabSolutions\Data\2018\2018-wk09\PC-169.lcd  
 Background File : Blanco\_26022018.lcd  
 Method File : Method SCAN ACID standard.lcm  
 Report Format : DefaultLCMS.rpt  
 Tuning File : C:\LabSolutions\Tuning\Tuning-ESI-pos-neg01072015a.lct  
 Processed by : Admin  
 Modified Date : 26/2/2018 1:37:38 PM

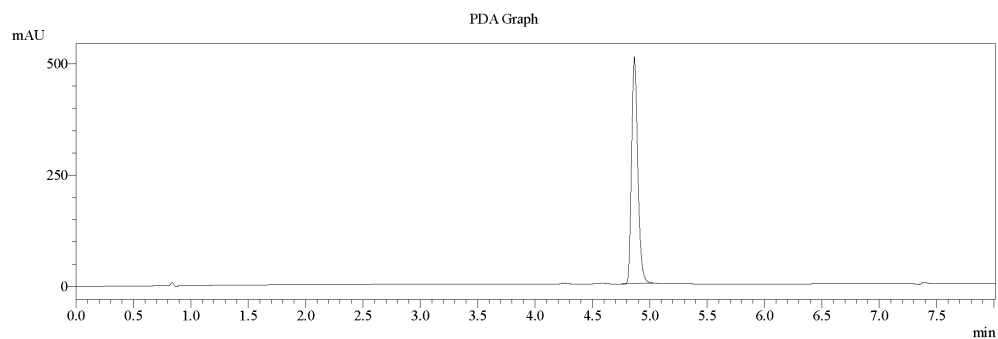

PDA Ch1 254nm 4nm

| Peak# | Name | Ret. Time | Area    | Area %  |
|-------|------|-----------|---------|---------|
| 1     |      | 4.860     | 1917737 | 100.000 |

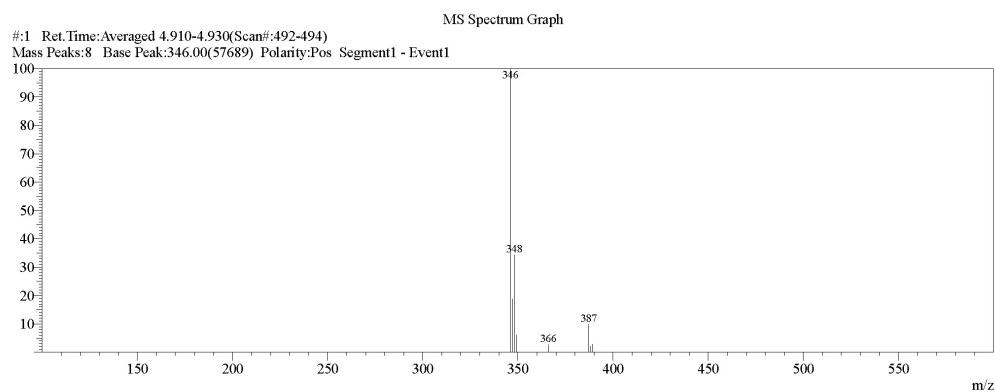

MS Spectrum Table

#1 Ret.Time:  
 BG Mode:Calc 4.810<=>5.090(482<=>510)  
 Mass Peaks:8 Base Peak:346.00(57689) Polarity:Pos Segment1 - Event1

| # | m/z    | Abs.Inten. | Rel.Inten. | Charge | Polarity | Monoisotopic | # | m/z    | Abs.Inten. | Rel.Inten. | Charge | Polarity | Monoisotopic |
|---|--------|------------|------------|--------|----------|--------------|---|--------|------------|------------|--------|----------|--------------|
| 1 | 346.00 | 57689      | 100.00     |        |          |              | 5 | 366.05 | 1538       | 2.67       |        |          |              |
| 2 | 347.05 | 10904      | 18.90      |        |          |              | 6 | 387.10 | 5665       | 9.82       |        |          |              |
| 3 | 348.00 | 19782      | 34.29      |        |          |              | 7 | 388.00 | 1231       | 2.13       |        |          |              |
| 4 | 349.05 | 3498       | 6.06       |        |          |              | 8 | 389.15 | 1638       | 2.84       |        |          |              |

**Figure S249 LCMS spectrum of compound NPD-3302**

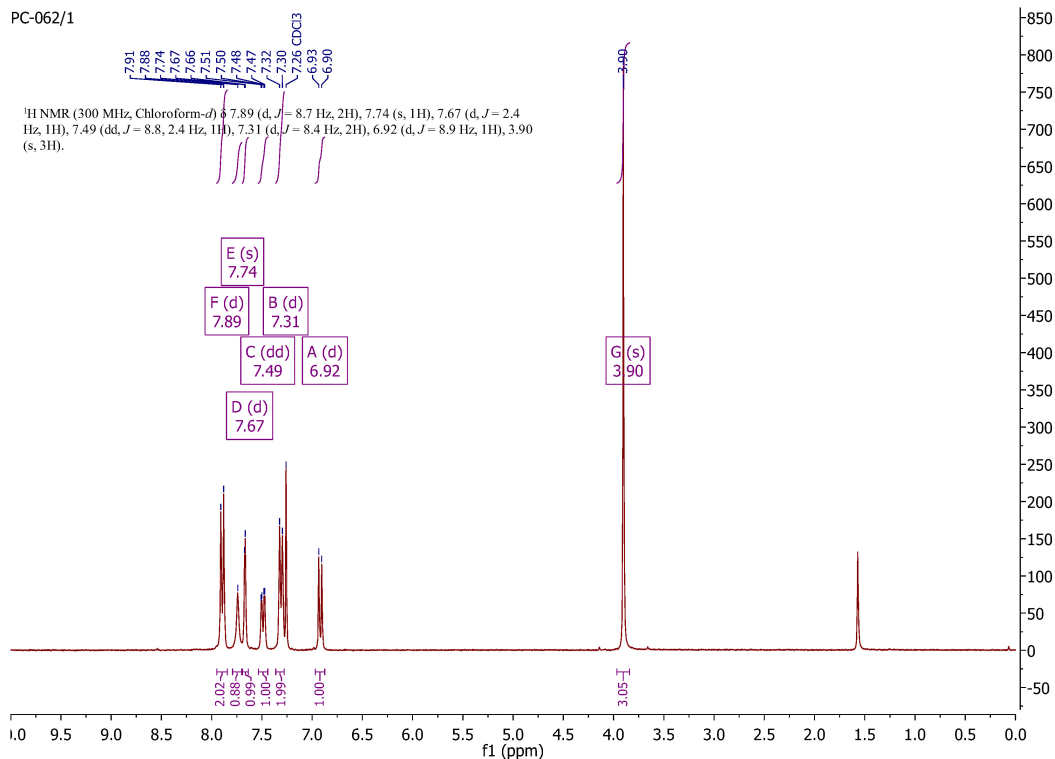

Figure S250 <sup>1</sup>H NMR spectrum of compound NPD-3302

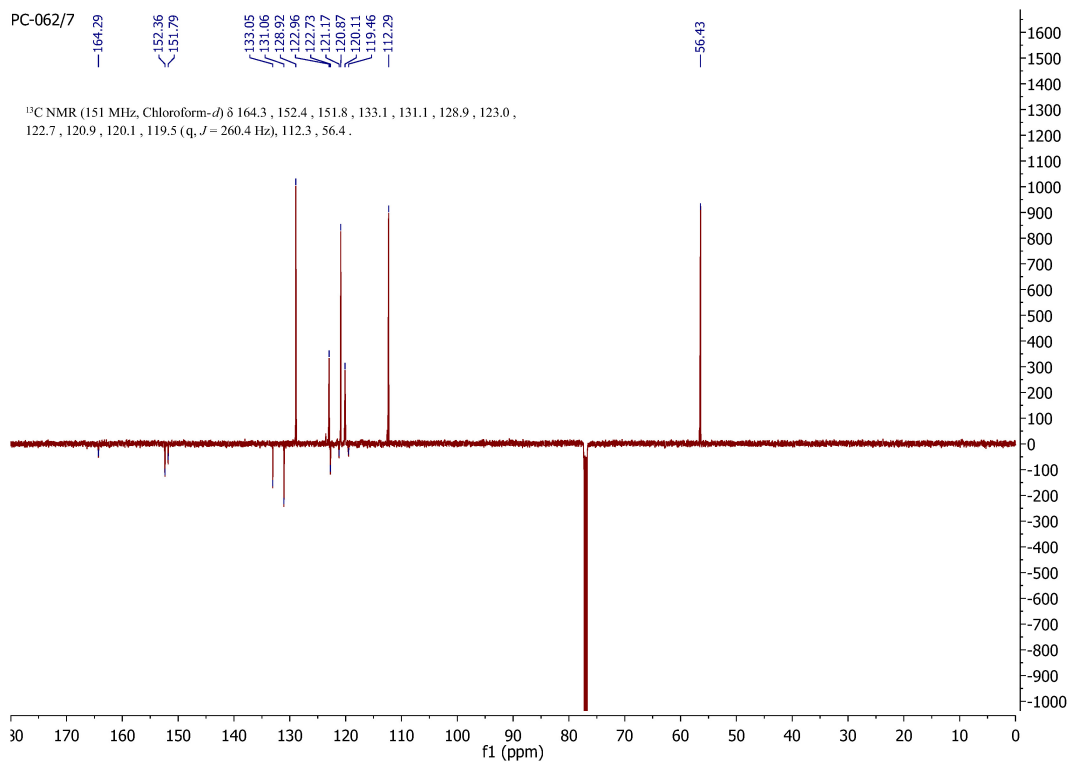

Figure S251 <sup>13</sup>C NMR spectrum of compound NPD-3302



Acquired by : Admin  
 Date Acquired : 28/2/2018 10:45:33 AM  
 Sample Name : PC-170-3  
 Sample ID :  
 Tray# : 1  
 Vial# : 6  
 Injection Volume : 3  
 Data File : C:\LabSolutions\Data\2018\2018-wk09\PC-170-3.lcd  
 Background File : blanco 28022018.lcd  
 Method File : Method SCAN ACID standard.lcm  
 Report Format : Default1.CMS.lcr  
 Tuning File : C:\LabSolutions\Tuning\Tuning-ESI-pos-neg01072015a.lct  
 Processed by : Admin  
 Modified Date : 28/2/2018 11:27:33 AM

Medicinal Chemistry  
 Vrije Universiteit Amsterdam

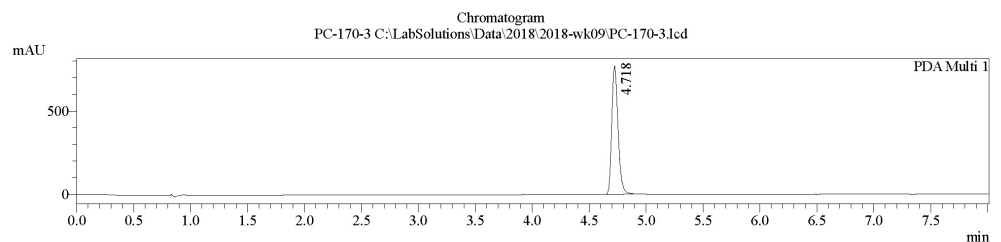

PeakTable

| Peak# | Name | Ret. Time | Area    | Area %  |
|-------|------|-----------|---------|---------|
| 1     |      | 4.718     | 2912045 | 100.000 |

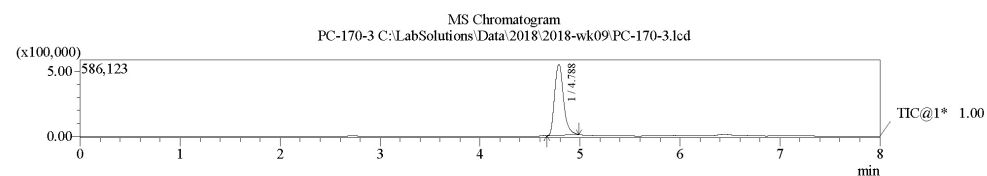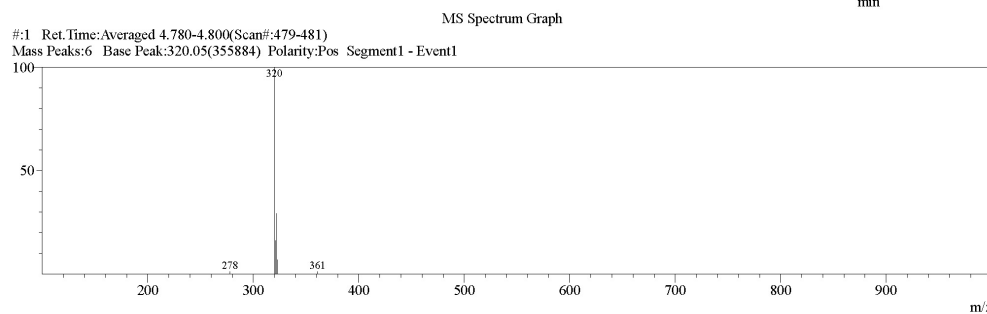

MS Spectrum Table

| # | m/z    | Abs.Inten. | Rel.Inten. | Charge | Polarity | Monoisotopic |
|---|--------|------------|------------|--------|----------|--------------|
| 1 | 278.00 | 4713       | 1.32       |        |          |              |
| 2 | 320.05 | 355884     | 100.00     |        |          |              |
| 3 | 321.05 | 57697      | 16.21      |        |          |              |
| 4 | 322.05 | 104423     | 29.34      |        |          |              |
| 5 | 323.05 | 24296      | 6.83       |        |          |              |
| 6 | 361.15 | 4157       | 1.17       |        |          |              |

Figure S252 LCMS spectrum of compound NPD-3303

PC-063/1

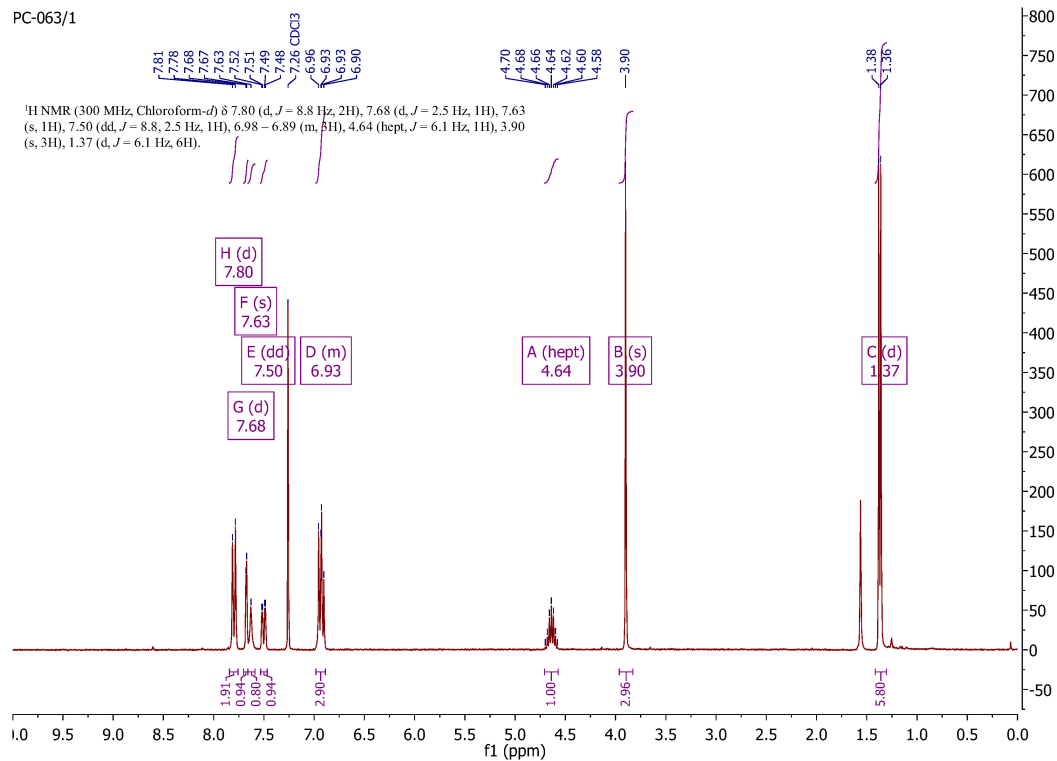Figure S253 <sup>1</sup>H NMR spectrum of compound NPD-3303

PC-063/2

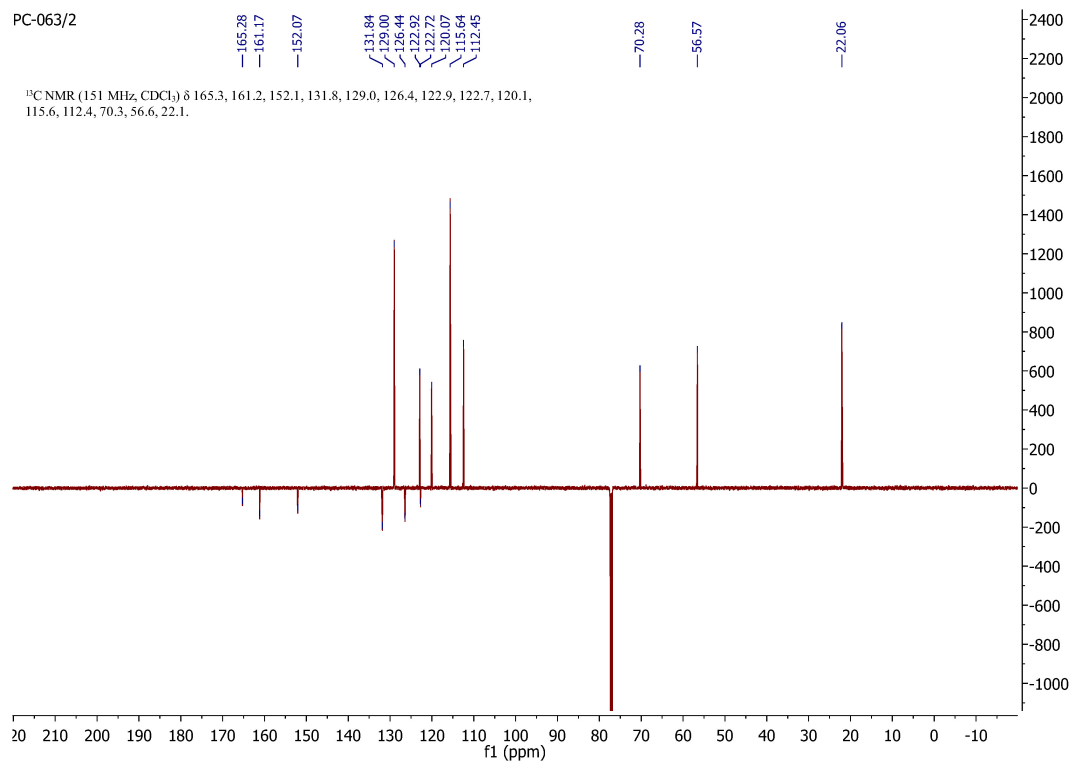Figure S254 <sup>13</sup>C NMR spectrum of compound NPD-3303

Acquired by : Admin  
 Date Acquired : 26/2/2018 1:11:45 PM  
 Sample Name : PC-172  
 Sample ID :  
 Tray# : 1  
 Vial# : 20  
 Injection Volume : 3  
 Data File : C:\LabSolutions\Data\2018\2018-wk09\PC-172.Lcd  
 Background File : Blanco\_26022018.Lcd  
 Method File : Method SCAN ACID standard.lcm  
 Report Format : DefaultLCMS.lcr  
 Tuning File : C:\LabSolutions\Tuning\Tuning-ESI-pos-neg01072015a.lct  
 Processed by : Admin  
 Modified Date : 26/2/2018 1:39:01 PM

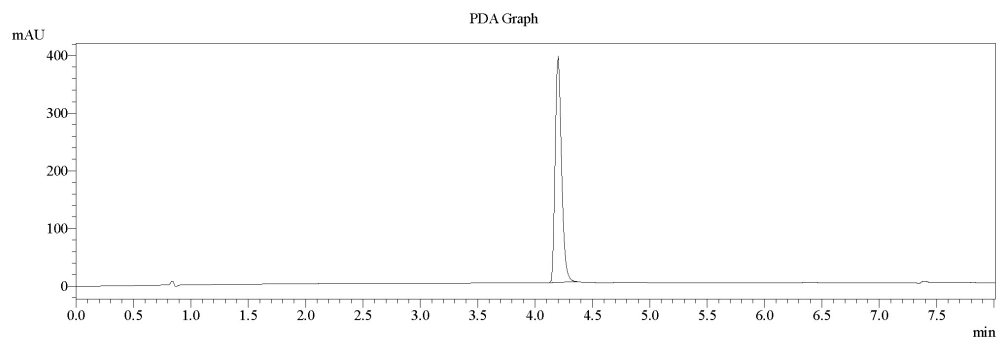

PDA Ch1 254nm 4nm

| Peak# | Name | Ret. Time | Area    | Area %  |
|-------|------|-----------|---------|---------|
| 1     |      | 4.195     | 1506868 | 100.000 |

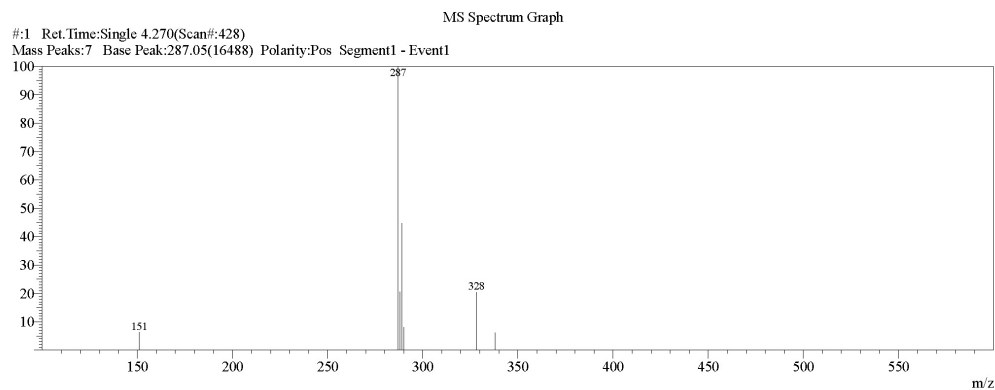

MS Spectrum Table

#1 Ret.Time:  
 BG Mode:None  
 Mass Peaks:7 Base Peak:287.05(16488) Polarity:Pos Segment1 - Event1

| # | m/z    | Abs.Inten. | Rel.Inten. | Charge | Polarity | Monoisotopic | # | m/z    | Abs.Inten. | Rel.Inten. | Charge | Polarity | Monoisotopic |
|---|--------|------------|------------|--------|----------|--------------|---|--------|------------|------------|--------|----------|--------------|
| 1 | 151.00 | 1034       | 6.27       |        |          |              | 5 | 290.00 | 1334       | 8.09       |        |          |              |
| 2 | 287.05 | 16488      | 100.00     |        |          |              | 6 | 328.15 | 3365       | 20.41      |        |          |              |
| 3 | 288.00 | 3385       | 20.53      |        |          |              | 7 | 338.00 | 1021       | 6.19       |        |          |              |
| 4 | 289.15 | 7381       | 44.77      |        |          |              |   |        |            |            |        |          |              |

**Figure S255 LCMS spectrum of compound NPD-3304**

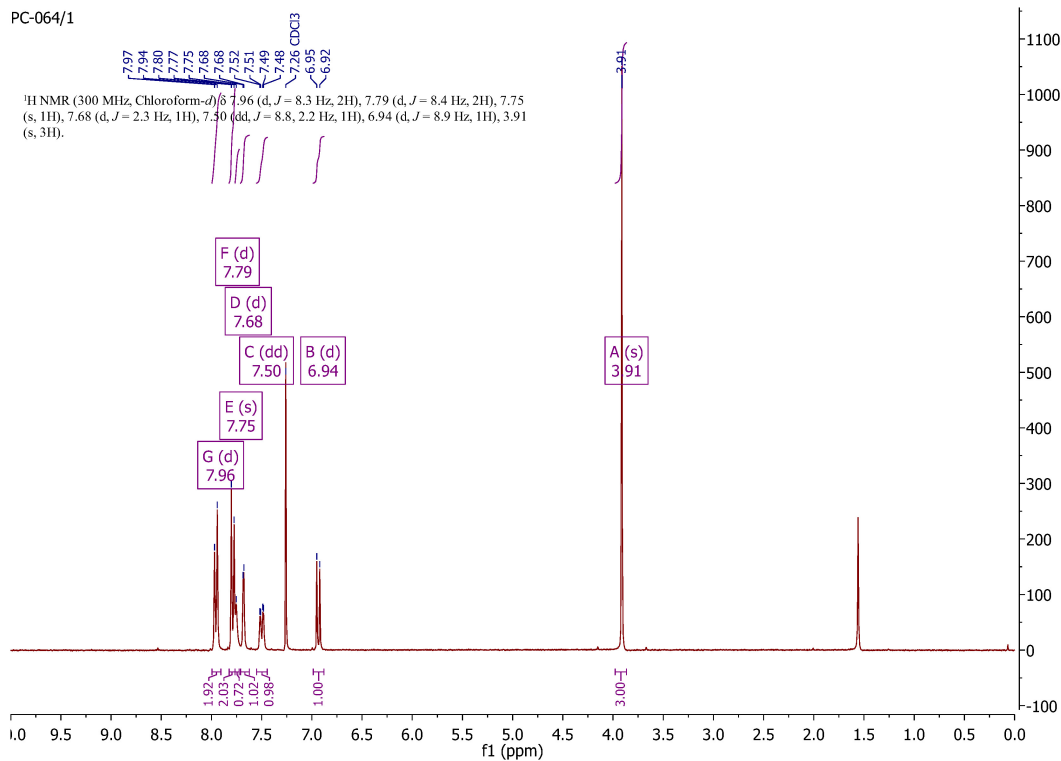

Figure S256  $^1\text{H}$  NMR spectrum of compound NPD-3304

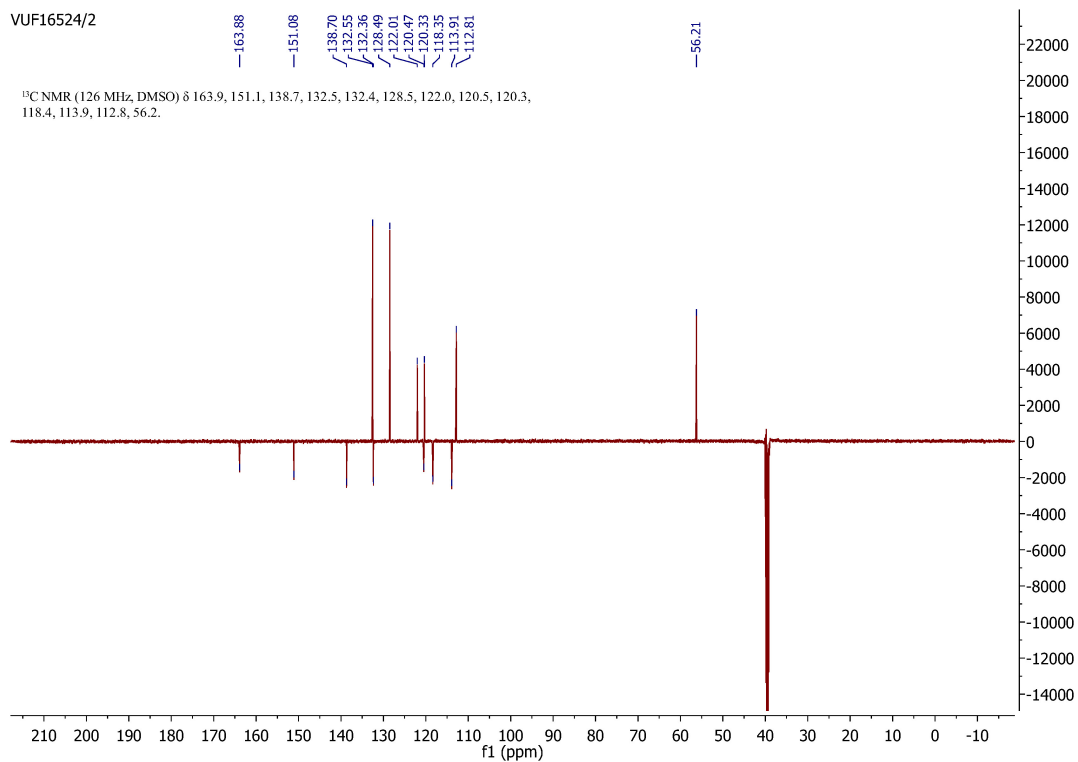

Figure S257  $^{13}\text{C}$  NMR spectrum of compound NPD-3304

## Reference:

1. Ashton, M.J.; Cook, D.C.; Fenton, G.; Karlsson, J.A.; Palfreyman, M.N.; Raeburn, D.; Ratcliffe, A.J.; Souness, J.E.; Thurairatnam, S.; Vicker, N. Selective Type IV Phosphodiesterase Inhibitors as Antiasthmatic Agents. The Syntheses and Biological Activities of 3-(Cyclopentyloxy)-4-Methoxybenzamides and Analogues. *J Med Chem* **1994**, *37*, 1696–1703, doi:10.1021/jm00037a021.
2. Lin, Y.; Huang, P.; Liu, S.; Sima, L.; Chen, L.; Wang, D. A Convenient Method for the Synthesis of Roflumilast. *Research on Chemical Intermediates* **2013**, *39*, 2107–2113, doi:10.1007/s11164-012-0742-3.
3. Felding, J.; Sørensen, M.D.; Poulsen, T.D.; Larsen, J.; Andersson, C.; Refer, P.; Engell, K.; Ladefoged, L.G.; Thormann, T.; Vinggaard, A.M.; et al. Discovery and Early Clinical Development of 2-{6-[2-(3,5-Dichloro-4-Pyridyl)Acetyl]-2,3-Dimethoxyphenoxy}- N -Propylacetamide (LEO 29102), a Soft-Drug Inhibitor of Phosphodiesterase 4 for Topical Treatment of Atopic Dermatitis. *J Med Chem* **2014**, *57*, 5893–5903, doi:10.1021/jm500378a.
4. Bland, N.D.; Wang, C.; Tallman, C.; Gustafson, A.E.; Wang, Z.; Ashton, T.D.; Ochiana, S.O.; McAllister, G.; Cotter, K.; Fang, A.P.; et al. Pharmacological Validation of Trypanosoma Brucei Phosphodiesterases B1 and B2 as Druggable Targets for African Sleeping Sickness. *J Med Chem* **2011**, *54*, 8188–8194, doi:10.1021/jm201148s.
5. Yao, L.; Xiao, Z. The Preparation Method of Roflumilast N Oxide 2016.
6. Zhou, Z.Z.; Ge, B.C.; Zhong, Q.P.; Huang, C.; Cheng, Y.F.; Yang, X.M.; Wang, H.T.; Xu, J.P. Development of Highly Potent Phosphodiesterase 4 Inhibitors with Anti-Neuroinflammation Potential: Design, Synthesis, and Structure-Activity Relationship Study of Catecholamides Bearing Aromatic Rings. *Eur J Med Chem* **2016**, *124*, 372–379, doi:10.1016/j.ejmech.2016.08.052.
7. Freitag, A.; Wessier, I.; Racké, K. Phosphodiesterase Inhibitors Suppress A2-Adrenoceptor-Mediated 5-Hydroxytryptamine Release from Tracheae of Newborn Rabbits. *Eur J Pharmacol* **1998**, *354*, 67–71, doi:10.1016/S0014-2999(98)00439-7.
8. Francis, S.H.; Sekhar, K.R.; Ke, H.; Corbin, J.D. Inhibition of Cyclic Nucleotide Phosphodiesterases by Methylxanthines and Related Compounds BT - Methylxanthines. In; Fredholm, B.B., Ed.; Springer Berlin Heidelberg: Berlin, Heidelberg, 2011; pp. 93–133 ISBN 978-3-642-13443-2.
9. Thompson, W.J. Cyclic Nucleotide Phosphodiesterases: Pharmacology, Biochemistry and Function. *Pharmacol Ther* **1991**, *51*, 13–33, doi:10.1016/0163-7258(91)90039-O.
10. Menniti, F.S.; Faraci, W.S.; Schmidt, C.J. Phosphodiesterases in the CNS: Targets for Drug Development. *Nat Rev Drug Discov* **2006**, *5*, 660–670, doi:10.1038/nrd2058.
11. Bell, A.S.; Terrett, N.K. Pyrazolo[4,3-d]Pyrimidine Derivatives and Pharmaceutical Compositions Containing Them 1999.
12. Maurice, D.H.; Ke, H.; Ahmad, F.; Wang, Y.; Chung, J.; Manganiello, V.C. Advances in Targeting Cyclic Nucleotide Phosphodiesterases. *Nat Rev Drug Discov* **2014**, *13*, 290–314, doi:10.1038/nrd4228.
13. Ruppert, D.; Weithmann, K.U. HL 725, an Extremely Potent Inhibitor of Platelet Phosphodiesterase and Induced Platelet Aggregation in Vitro. *Life Sci* **1982**, *31*, 2037–2043, doi:10.1016/0024-3205(82)90095-9.
14. Sircar, I.; Steffen, R.P.; Bobowski, G.; Burke, S.E.; Newton, R.S.; Weishaar, R.E.; Bristol, J.A.; Evans, D.B. Cardiotonic Agents. 9. Synthesis and Biological Evaluation of a Series of (E)-4,5-Dihydro-6-[2-[4-(1H-Imidazol-1-Yl)Phenyl]Ethenyl]-3(2H)-Pyridazinones: A Novel Class of Compounds with Positive Inotropic,

- Antithrombotic, and Vasodilatory Activities for the Treatment of Congestive Heart Failure. *J Med Chem* **1989**, 32, 342–350, doi:10.1021/jm00122a011.
15. Sudo, T.; Tachibana, K.; Toga, K.; Tochizawa, S.; Inoue, Y.; Kimura, Y.; Hidaka, H. Potent Effects of Novel Anti-Platelet Aggregatory Cilostamide Analogues on Recombinant Cyclic Nucleotide Phosphodiesterase Isozyme Activity. *Biochem Pharmacol* **2000**, 59, 347–356, doi:10.1016/S0006-2952(99)00346-9.
  16. Mata, M.; Pallardo, F.; Morcillo, E.J.; Cortijo, J. Piclamilast Inhibits the Pro-Apoptotic and Anti-Proliferative Responses of A549 Cells Exposed to H<sub>2</sub>O<sub>2</sub> via Mechanisms Involving AP-1 Activation. *Free Radic Res* **2012**, 46, 690–699, doi:10.3109/10715762.2012.669040.
  17. Sterk, G.J.; Hatzelmann, A.; Barsig, J.; Marx, D.; Kley, H.-P.; Christiaans, J.A.M.; Menge, W.M.P.B. Pyrrolidinedione Substituted Piperidine-Phthalazones as Pde4 Inhibitors 2004.
  18. Vellas, B.; Sol, O.; J. Snyder, P.; Ousset, P.-J.; Haddad, R.; Maurin, M.; Lemarie, J.-C.; Desire, L.; P. Pando, M. EHT0202 in Alzheimers Disease: A 3-Month, Randomized, Placebo- Controlled, Double-Blind Study. *Curr Alzheimer Res* 2011, 8, 203–212.
  19. Sterk, G.J.; Hatzelmann, A.; Marx, D.; Steinhilber, W. Phthalazinones Derivatives Useful as Pde4/7 Inhibitors 2002.
  20. de Koning, H.P.; Gould, M.K.; Sterk, G.J.; Tenor, H.; Kunz, S.; Luginbuehl, E.; Seebeck, T. Pharmacological Validation of Trypanosoma Brucei Phosphodiesterases as Novel Drug Targets. *J Infect Dis* **2012**, 206, 229–237, doi:10.1093/infdis/jir857.
  21. Orrling, K.M.; Jansen, C.; Vu, X.L.; Balmer, V.; Bregy, P.; Shanmugham, A.; England, P.; Bailey, D.; Cos, P.; Maes, L.; et al. Catechol Pyrazolinones as Trypanocidals: Fragment-Based Design, Synthesis, and Pharmacological Evaluation of Nanomolar Inhibitors of Trypanosomal Phosphodiesterase B1. *J Med Chem* **2012**, 55, 8745–8756, doi:10.1021/jm301059b.
  22. Weinbrenner, S.; Dunkern, T.; Marx, D.; Schmidt, B.; Stenget, T.; Flockerzi, D.; Kautz, U.; Hauser, D.; Diefenbach, J.; Christiaans, J.A.M.; et al. 6-Benzyl-2,3,4,7-Tetrahydro-Indolo[2,3-c]Quinoline Compounds Useful as Pde5 Inhibitors 2008.
  23. Haning, H.; Niewöhner, U.; Schenke, T.; Lampe, T.; Hillisch, A.; Bischoff, E. Comparison of Different Heterocyclic Scaffolds as Substrate Analog PDE5 Inhibitors. *Bioorg Med Chem Lett* **2005**, 15, 3900–3907, doi:10.1016/j.bmcl.2005.05.090.
  24. Choi, S.-H.; Choi, D.-H.; Song, K.-S.; Shin, K.-H.; Chun, B.-G. Zaprinast, an Inhibitor of CGMP-Selective Phosphodiesterases, Enhances the Secretion of TNF- $\alpha$  and IL-1 $\beta$  and the Expression of iNOS and MHC Class II Molecules in Rat Microglial Cells. *J Neurosci Res* **2002**, 67, 411–421, doi:https://doi.org/10.1002/jnr.10102.
  25. Smith, S.J.; Cieslinski, L.B.; Newton, R.; Donnelly, L.E.; Fenwick, P.S.; Nicholson, A.G.; Barnes, P.J.; Barnette, M.S.; Giembycz, M.A. Discovery of BRL 50481 [3-( $\beta$ -N,N-Dimethylsulfonamido)-4-Methyl-Nitrobenzene], a Selective Inhibitor of Phosphodiesterase 7: In Vitro Studies in Human Monocytes, Lung Macrophages, and CD8<sup>+</sup> T-Lymphocytes. *Mol Pharmacol* **2004**, 66, 1679 LP – 1689, doi:10.1124/mol.104.002246.
  26. Redondo, M.; Brea, J.; Perez, D.I.; Soteras, I.; Val, C.; Perez, C.; Morales-García, J.A.; Alonso-Gil, S.; Paul-Fernandez, N.; Martin-Alvarez, R.; et al. Effect of Phosphodiesterase 7 (PDE7) Inhibitors in Experimental Autoimmune Encephalomyelitis Mice. Discovery of a New Chemically Diverse Family of Compounds. *J Med Chem* **2012**, 55, 3274–3284, doi:10.1021/jm201720d.

27. García, A.M.; Brea, J.; Morales-García, J.A.; Perez, D.I.; González, A.; Alonso-Gil, S.; Gracia-Rubio, I.; Ros-Simó, C.; Conde, S.; Cadavid, M.I.; et al. Modulation of CAMP-Specific PDE without Emetogenic Activity: New Sulfide-Like PDE7 Inhibitors. *J Med Chem* **2014**, *57*, 8590–8607, doi:10.1021/jm501090m.
28. DeNinno, M.P.; Wright, S.W.; Visser, M.S.; Etienne, J.B.; Moore, D.E.; Olson, T. v.; Rocke, B.N.; Andrews, M.P.; Zarbo, C.; Millham, M.L.; et al. 1,5-Substituted Nipecotic Amides: Selective PDE8 Inhibitors Displaying Diastereomer-Dependent Microsomal Stability. *Bioorg Med Chem Lett* **2011**, *21*, 3095–3098, doi:10.1016/J.BMCL.2011.03.022.
29. Howard, B.L.; Harvey, K.L.; Stewart, R.J.; Azevedo, M.F.; Crabb, B.S.; Jennings, I.G.; Sanders, P.R.; Manallack, D.T.; Thompson, P.E.; Tonkin, C.J.; et al. Identification of Potent Phosphodiesterase Inhibitors That Demonstrate Cyclic Nucleotide-Dependent Functions in Apicomplexan Parasites. *ACS Chem Biol* **2015**, *10*, 1145–1154, doi:10.1021/cb501004q.
30. Blaazer, A.R.; Singh, A.K.; De Heuvel, E.; Edink, E.; Orrling, K.M.; Veerman, J.J.N.; Van Den Bergh, T.; Jansen, C.; Balasubramaniam, E.; Mooij, W.J.; et al. Targeting a Subpocket in Trypanosoma Brucei Phosphodiesterase B1 (TbrPDEB1) Enables the Structure-Based Discovery of Selective Inhibitors with Trypanocidal Activity. *J Med Chem* **2018**, *61*, 3870–3888, doi:10.1021/acs.jmedchem.7b01670.
31. Malamas, M.S.; Ni, Y.; Erdei, J.; Stange, H.; Schindler, R.; Lankau, H.-J.; Grunwald, C.; Fan, K.Y.; Parris, K.; Langen, B.; et al. Highly Potent, Selective, and Orally Active Phosphodiesterase 10A Inhibitors. *J Med Chem* **2011**, *54*, 7621–7638, doi:10.1021/jm2009138.
32. Ceyhan, O.; Birsoy, K.; Hoffman, C.S. Identification of Biologically Active PDE11-Selective Inhibitors Using a Yeast-Based High-Throughput Screen. *Chem Biol* **2012**, *19*, 155–163, doi:10.1016/J.CHEMBIOL.2011.12.010.
33. Rose, A.S.; Bradley, A.R.; Valasatava, Y.; Duarte, J.M.; Prlić, A.; Rose, P.W. NGL Viewer: Web-Based Molecular Graphics for Large Complexes. *Bioinformatics* **2018**, *34*, 3755–3758, doi:10.1093/bioinformatics/bty419.
